# Supplementary material for: Blocking Kir6.2 channels with SpTx1 potentiates glucose-stimulated insulin secretion from murine pancreatic β cells and lowers blood glucose in diabetic mice
Source: eLife. 2022 Feb 25;11:e77026. doi: 10.7554/eLife.77026 (PMC8880991; doi:10.7554/eLife.77026)
Supplement: Figure 1—source data 1. [file elife-77026-fig1-data1.xlsx]

## Sheet: Figure 1
A	DMSO	Mouse 1	Mouse 2	Mouse 3	Mouse 4	Mouse 5	Mean	SEM	Glibenclamide	Mouse 1	Mouse 2	Mouse 3	Mouse 4	Mouse 5	Mean	SEM
	Minutes	Female	Female	Female	Male	Male	n=5	n=5	Minutes	Female	Female	Female	Male	Male	n=5	n=5
	0	177.5	162.5	138	231	188	179.4	15.3943	0	158.5	133.5	162	199.5	179.5	166.6	11.0254
	5	166	148.5	127	208.5	183.5	166.7	14.0309	5	140.5	103.5	156	195	184	155.8	16.2808
	10	162.5	154	131	225	210	176.5	17.6734	10	207	147.5	176.5	225	235.5	198.3	16.1683
	15	173.5	195.5	148	222	227.5	193.3	14.9035	15	183.5	148	206	226	201	192.9	13.1095
	25	232	199	197	215	198	208.2	6.80735	25	191.5	146	182	188.5	169.5	175.5	8.28704
	40	174.5	185	191.5	236	181	193.6	10.9538	40	166.5	185	188.5	169.5	177.5	177.4	4.25558
	70	180	187	151	216	167	180.2	10.8508	70	110	142	142.5	176.5	124.5	139.1	11.1326
	120	165.5	167	153	256.5	168.5	182.1	18.8025	120	90.5	95.5	95.5	106	107.5	99	3.30151
B	saline	Mouse 1	Mouse 2	Mouse 3	Mouse 4	Mouse 5	Mean	SEM	SpTx1	Mouse 1	Mouse 2	Mouse 3	Mouse 4	Mouse 5	Mean	SEM
	Minutes	Male	Female	Female	Female	Female	n=5	n=5	Minutes	Male	Male	Male	Male	Female	n=5	n=5
	0	175.5	169	171	203.5	153.5	174.5	8.14095	0	183.5	206.5	196.5	136	137.5	172	14.8476
	5	185	200.5	175	221	186.5	193.6	7.96461	5	191	185	210.5	170.5	150.5	181.5	10.0635
	10	162	218	151	197	196.5	184.9	12.3495	10	144.5	132.5	172.5	157	185.5	158.4	9.48472
	15	177	234.5	182.5	196.5	214.5	201	10.5901	15	153	134	211	161.5	189	169.7	13.5993
	25	186	177	226.5	223.5	189	200.4	10.2462	25	195	208	173.5	183	176.5	187.2	6.37691
	40	184.5	169.5	264.5	233	254.5	221.2	18.8981	40	192.5	150	192	186	188.5	181.8	8.03835
	70	162.5	182	236.5	225.5	170.5	195.4	14.962	70	135.5	120.5	220.5	181	163	164.1	17.5879
	120	161.5	167.5	182	174	154.5	167.9	4.7786	120	168.5	124.5	163	144	144.5	148.9	7.81569
C	Secreted insulin (ng/mL)					Total insulin (ng/mL)					Amount of insulin (secreted/total)
	[Glucose]	[SpTx1]	Run 1	Run 2	Run 3	[Glucose]	[SpTx1]	Run 1	Run 2	Run 3	[Glucose]	[SpTx1]	Run 1	Run 2	Run 3	Mean	SEM
	7G	0 µM	4.63275	4.72688	6.90661	7G	0 µM	1286.69	1269.44	1501.82	7G	0 µM	0.360051	0.372358	0.459883	0.39743	0.0314275
		0.2 µM	3.57075	0.849659	2.19868		0.2 µM	584.269	596.014	878.267		0.2 µM	0.611149	0.142557	0.250343	0.334683	0.141691
		0.7 µM	1.52737	1.93525	1.7816		0.7 µM	516.193	522.079	597.887		0.7 µM	0.295891	0.370682	0.297982	0.321518	0.0245893
		1.0 µM	3.63035	0.393759	3.46604		1.0 µM	549.538	568.355	757.068		1.0 µM	0.660619	0.0692805	0.457823	0.395907	0.173489
	15G	0 µM	10.6337	10.4379	9.50251	15G	0 µM	917.998	941.058	971.928	15G	0 µM	1.15836	1.10917	0.977697	1.08174	0.0539249
		0.2 µM	4.6903	4.6947	6.44748		0.2 µM	581.433	604.611	779.022		0.2 µM	0.806679	0.776482	0.827638	0.8036	0.0148473
		0.7 µM	5.01138	11.7396	6.18092		0.7 µM	705.672	714.472	950.072		0.7 µM	0.710158	1.64311	0.650574	1.00128	0.321377
		1.0 µM	7.52204	6.78052	9.26055		1.0 µM	747.03	763.889	1025.46		1.0 µM	1.00693	0.887631	0.903063	0.93254	0.0374588
