# Supplementary material for: Blocking Kir6.2 channels with SpTx1 potentiates glucose-stimulated insulin secretion from murine pancreatic β cells and lowers blood glucose in diabetic mice
Source: eLife. 2022 Feb 25;11:e77026. doi: 10.7554/eLife.77026 (PMC8880991; doi:10.7554/eLife.77026)
Supplement: Figure 2—source data 1. [file elife-77026-fig2-data1.xlsx]

## Sheet: Figure 2
A					Vm (V)								Vm (mV)
	Condition				islet 1	islet 2	islet 3	islet 4	islet 5	islet 6	Mean	SEM	Mean	SEM
	buffer without Glucose				-0.0908835	-0.0729571	-0.0796077	-0.0833486	-0.0831563	-0.0852705	-0.0825373	0.00243949	-82.5373	2.43949
	15 mM Glucose				-0.0649386	-0.0339173	-0.0417697	-0.0405553	-0.034155	-0.0430224	-0.0430597	0.00465296	-43.0597	4.65296
	buffer without Glucose				-0.0903175	-0.0741279	-0.0857824	-0.0828596	-0.0848917	-0.0877858	-0.0842942	0.00228367	-84.2942	2.28367
	0.2 uM SpTx in 0mM Glucose				-0.0908857	-0.0763435	-0.0862287	-0.0862809	-0.0838846	-0.0922063	-0.0859716	0.00231111	-85.9716	2.31111
	0.4 uM Glibenclamide in 0 mM Glucose				-0.0504347	-0.0206053	-0.0450109	-0.0368378	-0.052937	-0.0577705	-0.0439327	0.0055091	-43.9327	5.5091
B					Vm (V)					Vm (mV)
	Condition				islet 1	islet 2	islet 3	Mean	SEM	Mean	SEM
	5 mM Glucose				-0.0704149	-0.0804519	-0.0838485	-0.0782384	0.00403278	-78.2384	4.03278
	15 mM Glucose				-0.0418886	-0.0374632	-0.0450777	-0.0414765	0.00220775	-41.4765	2.20775
	5 mM Glucose				-0.0731401	-0.067926	-0.0889626	-0.0766762	0.00632489	-76.6762	6.32489
	0.2 uM SpTx1 in 5 mM Glucose				-0.0828021	-0.0732019	-0.0884007	-0.0814682	0.00443792	-81.4682	4.43792
	0.2 uM Glibenclamide in 5 mM Glucose				-0.0533524	-0.0330605	-0.0402974	-0.0422368	0.00593748	-42.2368	5.93748
C					Vm (V)								Vm (mV)
	Condition				islet 1	islet 2	islet 3	islet 4	islet 5	islet 6	Mean	SEM	Mean	SEM
	8 mM Glucose				-0.0711864	-0.0744964	-0.0784332	-0.0731932	-0.0784356	-0.0686026	-0.0740579	0.00160472	-74.0579	1.60472
	15 mM Glucose				-0.0470986	-0.05038	-0.0491588	-0.0449184	-0.0453313	-0.0276323	-0.0440866	0.0034029	-44.0866	3.4029
	8 mM Glucose				-0.0689594	-0.0757768	-0.0729725	-0.0706478	-0.0751865	-0.0641554	-0.0712831	0.00177849	-71.2831	1.77849
	0.2 uM SpTx in 8 mM Glucose				-0.0886806	-0.0724093	-0.0850111	-0.0665897	-0.0859695	-0.0724093	-0.0785116	0.0037322	-78.5116	3.7322
	0.4 uM Glibenclamide in 8 mM Glucose				-0.0466874	-0.0479855	-0.0427164	n/a	-0.0531055	-0.0321047	-0.0445199	0.00352002	-44.5199	3.52002
