# Supplementary material for: Blocking Kir6.2 channels with SpTx1 potentiates glucose-stimulated insulin secretion from murine pancreatic β cells and lowers blood glucose in diabetic mice
Source: eLife. 2022 Feb 25;11:e77026. doi: 10.7554/eLife.77026 (PMC8880991; doi:10.7554/eLife.77026)
Supplement: Figure 3—figure supplement 1—source data 1. [file elife-77026-fig3-figsupp1-data1.xlsx]

## Sheet: Figure 3-figure supplement 1
[SpTx1]	hKir6.2+hSUR1			[SpTx1]	mKir6.2+mSUR1			[SpTx1]	hKir6.2+mSUR1			[SpTx1]	mKir6.2+hSUR1			[SpTx1] in Molar	hKir6.2bgd			[SpTx1] in Molar	mKir6.2bgd
Molar	I/I0	SEM		Molar	I/I0	SEM		Molar	I/I0	SEM		Molar	I/I0	SEM
3e-09	0.80212	0.01343		3e-08	0.92475	0.01121		1e-09	0.92	0.0134		3e-08	0.93475	0.01331			I/I0	SEM			I/I0	SEM
1e-08	0.55742	0.03873		1e-07	0.8505	0.01398		3e-09	0.82212	0.01643		1e-07	0.83205	0.01478		1e-09	0.936	0.02063		1e-08	0.94925	0.01894
3e-08	0.3735	0.0133		3e-07	0.703	0.02632		1e-08	0.58742	0.03573		3e-07	0.6803	0.02345		3e-09	0.8698	0.02094		3e-08	0.88856	0.02049
1e-07	0.12667	0.00995		1e-06	0.43725	0.04143		3e-08	0.3935	0.0333		1e-06	0.40725	0.03012		1e-08	0.6272	0.02026		1e-07	0.75	0.02232
3e-07	0.04283	0.00785		3e-06	0.263	0.0295		1e-07	0.15667	0.01795		3e-06	0.232	0.02134		3e-08	0.4278	0.01974		3e-07	0.49478	0.04236
								3e-07	0.03283	0.00735		1e-05	0.091	0.0321		1e-07	0.2154	0.02093		1e-06	0.3075	0.03842
																3e-07	0.101	0.02634		3e-06	0.15196	0.02108
[SpTx1] in Molar	hKir6.2bgd+S103G+A107N+E108V			[SpTx1] in Molar	hKir6.2bgd+S103G+A107N			[SpTx1] in Molar	hKir6.2bgd+S103G+E108V			[SpTx1] in Molar	hKir6.2bgd+A107N+E108V			[SpTx1] in Molar	hKir6.2bgd+S103G			[SpTx1] in Molar	hKir6.2bgd+A107N
																	I/I0	SEM			I/I0	SEM
	I/I0	SEM			I/I0	SEM			I/I0	SEM			I/I0	SEM		1e-09	0.925	0.032		1e-09	0.941	0.024
3e-08	0.88	0.0293		1e-09	0.945	0.032		1e-08	0.937	0.024		1e-08	0.954	0.032		3e-09	0.8326	0.042		3e-09	0.886	0.032
1e-07	0.706	0.026		3e-09	0.856	0.042		3e-08	0.876	0.032		3e-08	0.88	0.031		1e-08	0.64332	0.038		1e-08	0.724	0.023
3e-07	0.51	0.031		1e-08	0.632	0.038		1e-07	0.732	0.023		1e-07	0.753	0.025		3e-08	0.45343	0.0267		3e-08	0.457	0.026
1e-06	0.272	0.0217		3e-08	0.443	0.0267		3e-07	0.476	0.026		3e-07	0.49	0.023		1e-07	0.2243	0.022		1e-07	0.269	0.021
3e-06	0.14	0.035		1e-07	0.23	0.022		1e-06	0.289	0.021		1e-06	0.299	0.016		3e-07	0.1252	0.021		3e-07	0.121	0.018
				3e-07	0.12	0.021		3e-06	0.142	0.018		3e-06	0.174	0.021
[SpTx1] in Molar	hKir6.2bgd+E108V			[SpTx1]	mKir6.2bgd+V108E		mKir6.2bgd+G103S+N107A+V108E			[SpTx1]	mKir6.2V108E + mSUR1			[SpTx1]	hKir6.2E108V + hSUR1				[SpTx1]	hKir6.2bgd		mKir6.2bgd+N107YV108
	I/I0	SEM		Molar	I/I0	SEM	I/I0	SEM											Molar	I/I0	SEM	I/I0	SEM
3e-08	0.86925	0.02721		1e-09	0.90975	0.03214	0.922	0.01625		Molar	I/I0	SEM		Molar	I/I0	SEM			1e-09	0.936	0.02063	0.923	0.013
1e-07	0.72425	0.02006		3e-09	0.8026	0.02407	0.778	0.02988		1e-09	0.955	0.0122		3e-08	0.95475	0.01631			3e-09	0.8698	0.02094	0.823	0.015
3e-07	0.4525	0.05309		1e-08	0.4874	0.04794	0.4816	0.02548		3e-09	0.90212	0.01643		1e-07	0.86205	0.01365			1e-08	0.6272	0.02026	0.573	0.023
1e-06	0.24733	0.07433		3e-08	0.2908	0.04974	0.322	0.01453		1e-08	0.63742	0.03573		3e-07	0.6403	0.01454			3e-08	0.4278	0.01974	0.3845	0.021
3e-06	0.20425	0.04492		1e-07	0.1798	0.05187	0.199	0.01488		3e-08	0.4235	0.0333		1e-06	0.43073	0.02457			1e-07	0.2154	0.02093	0.1656	0.016
				3e-07	0.13167	0.03234	0.1142	0.01567		1e-07	0.17667	0.01795		3e-06	0.2142	0.02345			3e-07	0.101	0.02634	0.06534	0.011
										3e-07	0.04363	0.00735		1e-05	0.08632	0.03241
