# Supplementary material for: Blocking Kir6.2 channels with SpTx1 potentiates glucose-stimulated insulin secretion from murine pancreatic β cells and lowers blood glucose in diabetic mice
Source: eLife. 2022 Feb 25;11:e77026. doi: 10.7554/eLife.77026 (PMC8880991; doi:10.7554/eLife.77026)
Supplement: Figure 3—source data 1. [file elife-77026-fig3-data1.xlsx]

## Sheet: Figure 3
	A		B		C		D			E							F
	hKir6.2+hSUR1		mKir6.2+mSUR1		hKir6.2+mSUR1		mKir6.2+hSUR1			[SpTx1]	hKir6.2+hSUR1		[SpTx1]	mKir6.2+mSUR1			[SpTx1]	hKir6.2+mSUR1		[SpTx1]	mKir6.2+hSUR1
position	control	10 nM SpTx1	control	1 uM SpTx1	control	10 nM SpTx1	control	1 uM SpTx1		Molar	I/I0	SEM	Molar	I/I0	SEM		Molar	I/I0	SEM	Molar	I/I0	SEM
0	0.44861	0.24719	0.25635	0.1709	0.0885	0.07141	0.06104	0.07874		3e-09	0.80212	0.01343	3e-08	0.92475	0.01121		1e-09	0.92	0.0134	3e-08	0.93475	0.01331
0.1	0.44861	0.2655	0.2533	0.19531	0.07568	0.08728	0.07813	0.07629		1e-08	0.55742	0.03873	1e-07	0.8505	0.01398		3e-09	0.82212	0.01643	1e-07	0.83205	0.01478
0.2	0.46082	0.2594	0.27161	0.21057	0.0824	0.09277	0.05554	0.08606		3e-08	0.3735	0.0133	3e-07	0.703	0.02632		1e-08	0.58742	0.03573	3e-07	0.6803	0.02345
0.3	0.47913	0.28076	0.26245	0.21362	0.09521	0.09766	0.07996	0.10864		1e-07	0.12667	0.00995	1e-06	0.43725	0.04143		3e-08	0.3935	0.0333	1e-06	0.40725	0.03012
0.4	0.43335	0.26855	0.27466	0.18005	0.07874	0.10193	0.07263	0.11108		3e-07	0.04283	0.00785	3e-06	0.263	0.0295		1e-07	0.15667	0.01795	3e-06	0.232	0.02134
0.5	0.46692	0.2533	0.24719	0.18921	0.08362	0.09155	0.09338	0.08179									3e-07	0.03283	0.00735	1e-05	0.091	0.0321
0.6	0.46997	0.24109	0.26245	0.20142	0.0885	0.0885	0.07385	0.09033
0.7	0.45166	0.2533	0.2594	0.19226	0.09338	0.10864	0.07202	0.09338
0.8	0.4425	0.25024	0.2594	0.177	0.07874	0.08606	0.06592	0.07385
0.9	0.46997	0.26245	0.27466	0.15869	0.09399	0.09216	0.08362	0.0946
1	0.46387	0.25635	0.2533	0.19836	0.07935	0.08484	0.0647	0.08728
1.1	0.46997	0.24719	0.26855	0.17395	0.09155	0.10376	0.06836	0.09338
1.2	0.45471	0.24719	0.25635	0.17395	0.08911	0.10437	0.07019	0.08423
1.3	0.45471	0.27161	0.26855	0.18005	0.08545	0.09033	0.06531	0.09705
1.4	0.4425	0.21362	0.2594	0.177	0.08057	0.08301	0.06653	0.09399
1.5	0.44556	0.27466	0.25024	0.17395	0.08423	0.09766	0.07935	0.08789
1.6	0.45776	0.2594	0.24109	0.19226	0.07751	0.08728	0.05981	0.09033
1.7	0.46387	0.25635	0.25635	0.17395	0.09827	0.09155	0.05859	0.09827
1.8	0.43945	0.24414	0.24414	0.17395	0.08911	0.10437	0.06897	0.09888
1.9	0.47302	0.27466	0.27161	0.18005	0.07751	0.09949	0.07263	0.08179
2	0.4364	0.24414	0.25024	0.18616	0.07996	0.08423	0.07568	0.08606
2.1	0.46082	0.25024	0.24719	0.17395	0.07202	0.07324	0.07446	0.08911
2.2	0.45471	0.25024	0.2594	0.18311	0.0824	0.10742	0.08118	0.08667
2.3	0.46082	0.25024	0.26245	0.18616	0.09399	0.10193	0.06226	0.10437
2.4	0.4425	0.2594	0.2594	0.19226	0.08179	0.10742	0.08118	0.07813
2.5	0.43945	0.24109	0.26245	0.16785	0.08118	0.09216	0.08423	0.08789
2.6	0.46082	0.25635	0.26855	0.18616	0.08484	0.08606	0.06775	0.09033
2.7	0.46387	0.23499	0.24719	0.18005	0.08667	0.0946	0.07263	0.10864
2.8	0.47302	0.26245	0.26855	0.16785	0.08545	0.09705	0.07202	0.09521
2.9	0.42419	0.26855	0.25024	0.18005	0.0885	0.09644	0.0769	0.08118
3	0.45471	0.24109	0.26245	0.16785	0.08789	0.0946	0.07263	0.08667
3.1	0.46082	0.28381	0.25024	0.18311	0.07019	0.10193	0.07324	0.09766
3.2	0.45471	0.21973	0.2655	0.18616	0.07996	0.09399	0.05188	0.09644
3.3	0.45166	0.24109	0.2533	0.18616	0.08606	0.08972	0.07202	0.09216
3.4	0.46387	0.22583	0.25635	0.17395	0.07507	0.10803	0.0824	0.08179
3.5	0.4364	0.25635	0.25635	0.18921	0.09216	0.09888	0.06287	0.0885
3.6	0.45166	0.24719	0.2655	0.16785	0.09949	0.09033	0.07568	0.09338
3.7	0.45166	0.22583	0.27161	0.177	0.07813	0.11414	0.0769	0.09521
3.8	0.44556	0.25024	0.26245	0.1709	0.07935	0.09949	0.07568	0.08179
3.9	0.43945	0.24414	0.24719	0.1709	0.08301	0.0946	0.07202	0.11169
4	0.44556	0.25024	0.2655	0.1709	0.08179	0.09949	0.07568	0.08789
4.1	0.44861	0.24109	0.2533	0.177	0.09583	0.13	0.0824	0.09094
4.2	0.45471	0.24719	0.26245	0.18921	0.09216	0.08972	0.06592	0.09766
4.3	0.43945	0.24109	0.26855	0.18616	0.07568	0.09766	0.06287	0.08606
4.4	0.46387	0.25635	0.24719	0.17395	0.07874	0.10132	0.07568	0.0946
4.5	0.4303	0.24719	0.25635	0.1709	0.09521	0.09155	0.06592	0.09277
4.6	0.45166	0.26245	0.24719	0.18311	0.08606	0.10803	0.05798	0.09338
4.7	0.45776	0.22278	0.2594	0.19226	0.08423	0.09583	0.07874	0.08545
4.8	0.44556	0.25635	0.26855	0.177	0.09033	0.10498	0.08118	0.10315
4.9	0.43335	0.2594	0.26855	0.16479	0.08179	0.10864	0.06104	0.0769
5	0.4425	0.25024	0.26245	0.20142	0.08667	0.11841	0.08789	0.11353
5.1	0.45166	0.21362	0.27161	0.18311	0.08545	0.11353	0.06775	0.08545
5.2	0.47302	0.2533	0.25635	0.15869	0.08301	0.11353	0.07568	0.09094
5.3	0.4425	0.26245	0.25635	0.18616	0.07996	0.10559	0.06409	0.08301
5.4	0.47302	0.23499	0.2533	0.18005	0.07629	0.10559	0.07629	0.10071
5.5	0.46082	0.2533	0.2655	0.18311	0.08118	0.10254	0.07385	0.08118
5.6	0.44861	0.25024	0.2533	0.18005	0.09521	0.10437	0.07324	0.08972
5.7	0.4364	0.2594	0.25635	0.18311	0.07507	0.10437	0.07751	0.06836
5.8	0.46387	0.23193	0.2655	0.18311	0.07019	0.11292	0.07507	0.09644
5.9	0.44556	0.2533	0.25635	0.1709	0.08667	0.10193	0.08911	0.08362
6	0.4425	0.25024	0.26245	0.18616	0.08667	0.09338	0.07324	0.0824
6.1	0.45471	0.23499	0.24719	0.18921	0.08972	0.11963	0.0885	0.08972
6.2	0.44861	0.23193	0.2655	0.17395	0.09338	0.09155	0.06897	0.09094
6.3	0.46082	0.23804	0.26855	0.18311	0.09216	0.10132	0.08362	0.08118
6.4	0.45166	0.25024	0.2594	0.18311	0.08911	0.1062	0.0769	0.09583
6.5	0.4425	0.23499	0.26245	0.16785	0.07751	0.09949	0.06714	0.0824
6.6	0.44861	0.23804	0.2533	0.18616	0.08789	0.10132	0.08728	0.09338
6.7	0.43335	0.24109	0.2655	0.17395	0.09094	0.11414	0.06592	0.08179
6.8	0.45166	0.23193	0.26855	0.19226	0.07935	0.10498	0.06897	0.08484
6.9	0.45166	0.25024	0.2533	0.177	0.08972	0.10376	0.08545	0.07629
7	0.45166	0.26245	0.28076	0.177	0.09277	0.10559	0.07385	0.08972
7.1	0.46997	0.24414	0.25024	0.18921	0.09094	0.10742	0.07629	0.07629
7.2	0.41809	0.25024	0.28992	0.18005	0.08545	0.1123	0.07202	0.07935
7.3	0.47302	0.21667	0.26245	0.18616	0.07996	0.09338	0.06531	0.06897
7.4	0.44861	0.2533	0.26855	0.18616	0.09705	0.09094	0.08606	0.08545
7.5	0.44556	0.23499	0.27161	0.18005	0.08179	0.09338	0.06958	0.08057
7.6	0.46387	0.26245	0.28992	0.18921	0.06287	0.1062	0.07568	0.08789
7.7	0.42725	0.23804	0.26245	0.19226	0.08789	0.08484	0.07813	0.09521
7.8	0.45776	0.22583	0.28076	0.18005	0.09277	0.09949	0.07324	0.07629
7.9	0.46997	0.25024	0.25635	0.177	0.08179	0.10742	0.07019	0.07324
8	0.41809	0.25024	0.2655	0.18311	0.08362	0.09277	0.07813	0.08362
8.1	0.45471	0.24414	0.27161	0.18005	0.09216	0.1062	0.06287	0.0769
8.2	0.46082	0.24414	0.28381	0.19836	0.08911	0.08911	0.07874	0.06836
8.3	0.45166	0.23804	0.28076	0.18311	0.08606	0.10498	0.06348	0.07385
8.4	0.45166	0.24414	0.27466	0.18921	0.0824	0.09827	0.09888	0.07324
8.5	0.4364	0.23804	0.28687	0.1709	0.0946	0.09583	0.06714	0.07813
8.6	0.44861	0.22888	0.27771	0.19226	0.08484	0.09827	0.07874	0.07629
8.7	0.4425	0.24719	0.27466	0.18005	0.09399	0.09277	0.07263	0.08362
8.8	0.45166	0.23499	0.2655	0.19836	0.07935	0.10681	0.07629	0.07935
8.9	0.45471	0.2533	0.27466	0.18311	0.0824	0.09827	0.0708	0.0708
9	0.46692	0.23804	0.25635	0.18005	0.08362	0.08484	0.06653	0.07263
9.1	0.4425	0.2533	0.29602	0.18311	0.07629	0.10742	0.08972	0.08667
9.2	0.44556	0.22278	0.2655	0.19531	0.09338	0.08362	0.06775	0.07202
9.3	0.45166	0.27161	0.28381	0.19836	0.07202	0.11658	0.08728	0.0824
9.4	0.4425	0.23804	0.27466	0.21057	0.08789	0.09399	0.07629	0.07446
9.5	0.44861	0.23193	0.26855	0.19226	0.08972	0.08606	0.07568	0.07446
9.6	0.46387	0.25024	0.27771	0.19531	0.08728	0.08423	0.07202	0.09155
9.7	0.4364	0.25635	0.28381	0.18921	0.08301	0.09033	0.08484	0.07507
9.8	0.45471	0.2655	0.28381	0.21057	0.0885	0.10315	0.08301	0.08057
9.9	0.42114	0.23499	0.27771	0.20142	0.09338	0.09399	0.08545	0.06531
10	0.46997	0.23499	0.29297	0.19226	0.10132	0.08179	0.08545	0.07874
10.1	0.43945	0.2594	0.26245	0.19531	0.08972	0.1001	0.06104	0.06592
10.2	0.44556	0.2594	0.29602	0.18005	0.06653	0.09338	0.06104	0.08118
10.3	0.45166	0.23193	0.27771	0.22888	0.09705	0.09766	0.08179	0.07751
10.4	0.42725	0.23193	0.28381	0.19226	0.0824	0.09827	0.08423	0.08301
10.5	0.45166	0.25024	0.28687	0.18311	0.08118	0.09399	0.06714	0.06592
10.6	0.45471	0.24719	0.28687	0.20752	0.09338	0.08057	0.07202	0.07568
10.7	0.4425	0.27161	0.27771	0.18921	0.08057	0.09399	0.06592	0.06897
10.8	0.46387	0.23804	0.28992	0.18005	0.07019	0.08423	0.06592	0.07568
10.9	0.4303	0.2533	0.28076	0.21057	0.08362	0.08667	0.07385	0.0647
11	0.44861	0.25024	0.29907	0.19836	0.07202	0.09827	0.07935	0.06714
11.1	0.43335	0.25024	0.27466	0.20142	0.10681	0.08911	0.07629	0.07324
11.2	0.46997	0.26245	0.27771	0.19531	0.07996	0.1062	0.07446	0.06592
11.3	0.46082	0.24414	0.26855	0.19531	0.1001	0.07507	0.07202	0.08301
11.4	0.46387	0.2533	0.29907	0.18005	0.08606	0.08728	0.07141	0.06897
11.5	0.4364	0.25024	0.28687	0.19226	0.08057	0.0824	0.07629	0.07202
11.6	0.44861	0.26245	0.26855	0.20142	0.07263	0.08423	0.08179	0.07935
11.7	0.46082	0.27771	0.27771	0.20752	0.09094	0.08789	0.06897	0.07874
11.8	0.4303	0.2655	0.28992	0.20142	0.08545	0.0946	0.08362	0.06531
11.9	0.45776	0.25635	0.2594	0.20447	0.08606	0.07385	0.0647	0.07568
12	0.47302	0.2655	0.28076	0.19836	0.09033	0.09705	0.06409	0.08057
12.1	0.45166	0.23499	0.28076	0.21362	0.07813	0.09033	0.06531	0.07019
12.2	0.46692	0.26245	0.26855	0.19531	0.08606	0.07813	0.07385	0.06775
12.3	0.45471	0.28381	0.29602	0.19531	0.07568	0.08606	0.08423	0.08301
12.4	0.46387	0.2655	0.27771	0.19531	0.07385	0.08118	0.07813	0.07263
12.5	0.44556	0.23193	0.28381	0.18311	0.08667	0.08911	0.07813	0.06287
12.6	0.47302	0.27771	0.27771	0.20142	0.0769	0.08484	0.07385	0.07568
12.7	0.43335	0.2533	0.26855	0.20752	0.07751	0.08423	0.08057	0.0824
12.8	0.46387	0.24719	0.28687	0.18616	0.09521	0.09644	0.06958	0.07507
12.9	0.45471	0.2533	0.27771	0.21057	0.07202	0.0824	0.07324	0.06836
13	0.42419	0.25635	0.27161	0.18921	0.08789	0.08362	0.08057	0.07568
13.1	0.45776	0.24719	0.2594	0.19836	0.09277	0.0769	0.07568	0.07996
13.2	0.46692	0.25024	0.26855	0.19226	0.08362	0.07263	0.07263	0.07324
13.3	0.46692	0.25635	0.26245	0.20752	0.08606	0.08484	0.07263	0.07751
13.4	0.43335	0.26245	0.29907	0.19836	0.07568	0.08606	0.06836	0.06226
13.5	0.44556	0.24414	0.27466	0.18921	0.09094	0.07263	0.08545	0.0885
13.6	-14.0015	-14.0869	-10.9833	-11.7432	-7.15454	-7.49207	-7.3999	-7.30713
13.7	-49.1028	-49.9542	-42.2516	-42.2516	-20	-20	-20	-20
13.8	-37.3566	-33.5571	-26.001	-23.8678	-20	-20	-20	-20
13.9	-25.8331	-20.7733	-18.1091	-15.6342	-20	-20	-20	-20
14	-20.4681	-15.5029	-15.7227	-12.7747	-19.2706	-20	-20	-19.4818
14.1	-17.2302	-12.4847	-13.974	-10.5866	-15.8862	-18.0072	-18.0261	-15.7581
14.2	-15.0818	-10.4462	-12.7594	-9.10339	-13.2605	-15.6329	-15.5505	-12.9883
14.3	-13.6139	-9.03625	-12.0697	-8.22144	-11.2897	-13.9123	-13.7854	-10.9467
14.4	-12.6617	-8.10242	-11.6516	-7.66907	-9.80042	-12.644	-12.5067	-9.41528
14.5	-12.0056	-7.4646	-11.3861	-7.2937	-8.68103	-11.7279	-11.5381	-8.31848
14.6	-11.5387	-7.04346	-11.2122	-7.01904	-7.84485	-11.0382	-10.8618	-7.49512
14.7	-11.2579	-6.75049	-11.1328	-6.86646	-7.1936	-10.5432	-10.3693	-6.88965
14.8	-11.0443	-6.55518	-11.0626	-6.75049	-6.70898	-10.1648	-9.99023	-6.45691
14.9	-10.8948	-6.40869	-11.029	-6.66504	-6.33118	-9.89258	-9.74548	-6.09375
15	-10.8154	-6.27136	-11.0382	-6.63147	-6.06812	-9.70215	-9.53796	-5.85876
15.1	-10.73	-6.23169	-11.029	-6.56433	-5.86243	-9.54895	-9.38049	-5.66711
15.2	-10.7239	-6.18286	-11.0321	-6.54297	-5.68909	-9.43726	-9.30237	-5.52002
15.3	-10.7025	-6.14929	-11.0535	-6.53076	-5.59326	-9.37134	-9.20471	-5.42786
15.4	-10.6964	-6.11267	-11.0626	-6.5155	-5.49255	-9.3219	-9.17786	-5.33813
15.5	-10.6903	-6.13098	-11.0962	-6.50024	-5.40466	-9.28528	-9.14368	-5.29541
15.6	-10.6934	-6.12793	-11.1023	-6.49719	-5.37292	-9.2688	-9.11682	-5.25269
15.7	-10.7025	-6.11877	-11.1267	-6.48499	-5.36072	-9.25903	-9.11987	-5.23193
15.8	-10.73	-6.13403	-11.142	-6.47583	-5.30396	-9.24805	-9.0979	-5.20386
15.9	-10.7391	-6.15845	-11.1694	-6.48193	-5.29663	-9.27246	-9.13452	-5.19958
16	-10.7483	-6.13098	-11.1755	-6.46667	-5.28748	-9.27185	-9.13147	-5.18127
16.1	-10.7849	-6.14014	-11.2213	-6.48193	-5.29785	-9.27612	-9.14368	-5.20691
16.2	-10.7727	-6.13708	-11.2518	-6.48193	-5.28381	-9.2981	-9.16931	-5.19531
16.3	-10.8215	-6.1554	-11.2488	-6.46057	-5.27893	-9.31458	-9.19312	-5.20142
16.4	-10.8154	-6.15845	-11.2549	-6.46362	-5.31006	-9.33228	-9.19312	-5.20142
16.5	-10.8521	-6.1554	-11.2976	-6.45752	-5.31494	-9.34265	-9.21021	-5.22644
16.6	-10.8673	-6.17981	-11.3129	-6.45752	-5.30212	-9.375	-9.26086	-5.21851
16.7	-10.8643	-6.19202	-11.319	-6.46057	-5.32288	-9.39636	-9.26697	-5.23315
16.8	-10.8917	-6.16455	-11.3495	-6.46057	-5.33142	-9.4043	-9.2804	-5.25146
16.9	-10.9161	-6.18286	-11.3464	-6.45752	-5.33752	-9.42444	-9.30908	-5.26062
17	-10.9436	-6.21338	-11.3648	-6.45752	-5.36133	-9.45251	-9.32983	-5.27832
17.1	-10.9467	-6.19507	-11.377	-6.45142	-5.37598	-9.47205	-9.32678	-5.28198
17.2	-10.9802	-6.21643	-11.4288	-6.43311	-5.37415	-9.47937	-9.36523	-5.28442
17.3	-10.9741	-6.21338	-11.4166	-6.44226	-5.37964	-9.49768	-9.38354	-5.31311
17.4	-11.0077	-6.22559	-11.4258	-6.43616	-5.41504	-9.51965	-9.39209	-5.3064
17.5	-11.0046	-6.23169	-11.4533	-6.44226	-5.40649	-9.53918	-9.4281	-5.30701
17.6	-11.0077	-6.23779	-11.4746	-6.45447	-5.42175	-9.54285	-9.44214	-5.34119
17.7	-11.0443	-6.24084	-11.4838	-6.427	-5.43396	-9.55688	-9.43481	-5.34241
17.8	-11.0718	-6.23474	-11.4929	-6.43616	-5.448	-9.57458	-9.4635	-5.35278
17.9	-11.0779	-6.23474	-11.5204	-6.43921	-5.45105	-9.59717	-9.48486	-5.35767
18	-11.0657	-6.27136	-11.5356	-6.43921	-5.45715	-9.60632	-9.4873	-5.35645
18.1	-11.1175	-6.27441	-11.5326	-6.42395	-5.4834	-9.6405	-9.53186	-5.37231
18.2	-11.1359	-6.24695	-11.5631	-6.44531	-5.4834	-9.64172	-9.52759	-5.36438
18.3	-11.1175	-6.24695	-11.5723	-6.427	-5.50476	-9.64966	-9.54712	-5.39124
18.4	-11.1298	-6.29272	-11.5723	-6.4209	-5.50049	-9.67102	-9.55139	-5.39978
18.5	-11.1572	-6.27747	-11.615	-6.43005	-5.5072	-9.68811	-9.55872	-5.4187
18.6	-11.1725	-6.29883	-11.6272	-6.42395	-5.51025	-9.68628	-9.58313	-5.41687
18.7	-11.1633	-6.3385	-11.6303	-6.41174	-5.53833	-9.71619	-9.57336	-5.42175
18.8	-11.1786	-6.28052	-11.6547	-6.40869	-5.53772	-9.72412	-9.59595	-5.42786
18.9	-11.203	-6.31714	-11.6577	-6.41479	-5.53406	-9.7229	-9.60754	-5.43152
19	-11.2122	-6.30798	-11.6638	-6.40869	-5.55237	-9.74365	-9.63074	-5.43213
19.1	-11.2305	-6.32324	-11.7004	-6.41785	-5.54749	-9.75342	-9.6228	-5.44678
19.2	-11.2091	-6.30493	-11.6882	-6.40869	-5.55542	-9.76074	-9.64172	-5.45715
19.3	-11.2518	-6.33545	-11.7188	-6.41479	-5.56885	-9.7583	-9.65027	-5.47852
19.4	-11.261	-6.31409	-11.7127	-6.40564	-5.56702	-9.79553	-9.66797	-5.4718
19.5	-11.2884	-6.3385	-11.7401	-6.40869	-5.5896	-9.79858	-9.68262	-5.47729
19.6	-11.2671	-6.35986	-11.734	-6.39954	-5.59143	-9.81201	-9.68933	-5.47974
19.7	-11.2976	-6.3446	-11.7676	-6.40869	-5.59204	-9.8114	-9.69666	-5.48645
19.8	-11.3281	-6.35376	-11.7584	-6.38428	-5.60486	-9.82483	-9.72168	-5.48401
19.9	-11.3129	-6.34766	-11.795	-6.41785	-5.60974	-9.82483	-9.71863	-5.49866
20	-11.3251	-6.35681	-11.7859	-6.38428	-5.62073	-9.85107	-9.73083	-5.51575
20.1	-11.3342	-6.36902	-11.8164	-6.39954	-5.6311	-9.86816	-9.74121	-5.50964
20.2	-11.3495	-6.35986	-11.8347	-6.38733	-5.62561	-9.85535	-9.74304	-5.52551
20.3	-11.3617	-6.38123	-11.8317	-6.39343	-5.64026	-9.87854	-9.76318	-5.51147
20.4	-11.3678	-6.38123	-11.8256	-6.38733	-5.62561	-9.86328	-9.77478	-5.52246
20.5	-11.3831	-6.37817	-11.8561	-6.37512	-5.63904	-9.87488	-9.77112	-5.54749
20.6	-11.3953	-6.37512	-11.8774	-6.39038	-5.65369	-9.89807	-9.80103	-5.53101
20.7	-11.4105	-6.38123	-11.8713	-6.38733	-5.64636	-9.89014	-9.78577	-5.54871
20.8	-11.4197	-6.40259	-11.8927	-6.37207	-5.64148	-9.8999	-9.80591	-5.5603
20.9	-11.4166	-6.39038	-11.8744	-6.37512	-5.64941	-9.91211	-9.7998	-5.54199
21	-11.4441	-6.38428	-11.8927	-6.36902	-5.6665	-9.92615	-9.83704	-5.5481
21.1	-11.438	-6.38733	-11.9171	-6.37207	-5.67261	-9.91638	-9.81201	-5.56702
21.2	-11.4319	-6.41174	-11.9049	-6.37512	-5.66467	-9.9353	-9.82788	-5.5719
21.3	-11.4746	-6.40259	-11.9385	-6.35681	-5.68115	-9.93469	-9.84741	-5.578
21.4	-11.4716	-6.41479	-11.9354	-6.35376	-5.68726	-9.94934	-9.85352	-5.58716
21.5	-11.4655	-6.39343	-11.9568	-6.35986	-5.69092	-9.96155	-9.85413	-5.57007
21.6	-11.4899	-6.40869	-11.9537	-6.37207	-5.69092	-9.93469	-9.85657	-5.58533
21.7	-11.4777	-6.40564	-11.9507	-6.3324	-5.68787	-9.94873	-9.85474	-5.59814
21.8	-11.5082	-6.42395	-11.9842	-6.35071	-5.70557	-9.97009	-9.87854	-5.57556
21.9	-11.5112	-6.41174	-11.9751	-6.35681	-5.69031	-9.96521	-9.87549	-5.59082
22	-11.5204	-6.4209	-11.9934	-6.35071	-5.70862	-9.9884	-9.86877	-5.59265
22.1	-11.5326	-6.43005	-11.9873	-6.35681	-5.72083	-9.98352	-9.8938	-5.59143
22.2	-11.5356	-6.39343	-12.0148	-6.35681	-5.71167	-9.9707	-9.89319	-5.59326
22.3	-11.554	-6.46667	-12.0117	-6.34155	-5.72693	-9.99329	-9.89502	-5.59448
22.4	-11.5723	-6.45752	-12.0361	-6.35071	-5.71655	-10.0024	-9.89441	-5.61096
22.5	-11.5509	-6.42395	-12.0239	-6.3385	-5.72449	-10	-9.90845	-5.61707
22.6	-11.5784	-6.43311	-12.0544	-6.3385	-5.70923	-10.0043	-9.91333	-5.62195
22.7	-11.5814	-6.45142	-12.0483	-6.33545	-5.74036	-10.0165	-9.91882	-5.6189
22.8	-11.5906	-6.45142	-12.0453	-6.32324	-5.72205	-10.0092	-9.92981	-5.61707
22.9	-11.6028	-6.46973	-12.0727	-6.34155	-5.72388	-10.0238	-9.93103	-5.62988
23	-11.6089	-6.43921	-12.0666	-6.32935	-5.72693	-10.022	-9.94202	-5.63171
23.1	-11.6303	-6.43921	-12.0666	-6.32324	-5.73486	-10.0287	-9.92371	-5.62988
23.2	-11.6242	-6.47278	-12.085	-6.31104	-5.73792	-10.0397	-9.94934	-5.63477
23.3	-11.6211	-6.46362	-12.085	-6.32935	-5.76233	-10.0336	-9.94812	-5.63538
23.4	-11.6486	-6.46973	-12.085	-6.31409	-5.73853	-10.0384	-9.953	-5.63538
23.5	-11.6547	-6.46667	-12.0819	-6.31409	-5.74829	-10.0549	-9.94019	-5.62622
23.6	-11.6425	-6.46362	-12.1063	-6.32324	-5.7605	-10.0525	-9.95728	-5.62744
23.7	-11.6577	-6.48193	-12.1185	-6.32629	-5.76172	-10.047	-9.97864	-5.6543
23.8	-11.6699	-6.46667	-12.1429	-6.30798	-5.77454	-10.069	-9.95911	-5.63293
23.9	-11.6699	-6.48804	-12.1124	-6.31104	-5.7489	-10.0818	-9.97864	-5.64148
24	-11.6699	-6.48193	-12.1338	-6.30798	-5.76416	-10.072	-9.98108	-5.64758
24.1	-11.6974	-6.46362	-12.1429	-6.29272	-5.77393	-10.0806	-9.98535	-5.65552
24.2	-11.6821	-6.47583	-12.1613	-6.30188	-5.76416	-10.0854	-9.98169	-5.65979
24.3	-11.7096	-6.48193	-12.1399	-6.30493	-5.76538	-10.0977	-10.0024	-5.65002
24.4	-11.7127	-6.48499	-12.1429	-6.30798	-5.78308	-10.1056	-9.98474	-5.6604
24.5	-11.7127	-6.46973	-12.1765	-6.30493	-5.75867	-10.0964	-9.9884	-5.67444
24.6	-11.734	-6.50024	-12.1735	-6.28967	-5.77087	-10.0873	-9.98901	-5.66711
24.7	-11.7127	-6.49719	-12.1887	-6.30493	-5.78247	-10.0879	-10.0104	-5.66772
24.8	-11.7401	-6.50024	-12.1918	-6.28357	-5.77271	-10.1044	-9.99695	-5.67932
24.9	-11.7279	-6.5033	-12.1948	-6.28662	-5.77087	-10.116	-10.0073	-5.67261
25	-11.7676	-6.47888	-12.1857	-6.28662	-5.77209	-10.1135	-10.0165	-5.67749
25.1	-11.7554	-6.49109	-12.1979	-6.29578	-5.79041	-10.1148	-10.0159	-5.6665
25.2	-11.7706	-6.51245	-12.2009	-6.27441	-5.78186	-10.1056	-10.0128	-5.68176
25.3	-11.7828	-6.49109	-12.2253	-6.27441	-5.79163	-10.1404	-10.0165	-5.68237
25.4	-11.7828	-6.51245	-12.2192	-6.29578	-5.77881	-10.1245	-10.0128	-5.67322
25.5	-11.7645	-6.5033	-12.2223	-6.25916	-5.79712	-10.1184	-10.0427	-5.67505
25.6	-11.795	-6.49414	-12.2253	-6.27441	-5.7959	-10.1349	-10.0183	-5.66711
25.7	-11.7828	-6.51855	-12.2406	-6.26221	-5.78491	-10.1172	-10.025	-5.6842
25.8	-11.7859	-6.50635	-12.2345	-6.28357	-5.79041	-10.1312	-10.0256	-5.68787
25.9	-11.8011	-6.49414	-12.2345	-6.2561	-5.802	-10.1325	-10.0397	-5.67627
26	-11.8042	-6.5033	-12.2559	-6.26831	-5.79285	-10.1514	-10.0403	-5.68054
26.1	-11.8256	-6.5033	-12.2406	-6.24695	-5.79895	-10.1416	-10.0409	-5.67993
26.2	-11.8408	-6.5155	-12.2681	-6.25	-5.79895	-10.1538	-10.0409	-5.70618
26.3	-11.8317	-6.5033	-12.2681	-6.2439	-5.7959	-10.1526	-10.0507	-5.68054
26.4	-11.8286	-6.52161	-12.2498	-6.26221	-5.79895	-10.152	-10.0427	-5.69519
26.5	-11.85	-6.49109	-12.2589	-6.24695	-5.79224	-10.1514	-10.0311	-5.70007
26.6	-11.8317	-6.5094	-12.2742	-6.2561	-5.80444	-10.152	-10.0421	-5.69763
26.7	-11.8408	-6.5033	-12.262	-6.25	-5.80627	-10.1611	-10.0464	-5.69031
26.8	-11.8622	-6.50635	-12.2803	-6.24695	-5.80811	-10.1575	-10.0562	-5.68665
26.9	-11.8774	-6.53076	-12.2803	-6.25916	-5.81665	-10.1593	-10.0531	-5.69031
27	-11.8652	-6.52771	-12.2833	-6.23169	-5.802	-10.1733	-10.0647	-5.69153
27.1	-11.8835	-6.53076	-12.2894	-6.25916	-5.80811	-10.1721	-10.0549	-5.69214
27.2	-11.8927	-6.50024	-12.2864	-6.25916	-5.81787	-10.1672	-10.0659	-5.69397
27.3	-11.8988	-6.52771	-12.3108	-6.22864	-5.81116	-10.1764	-10.08	-5.7019
27.4	-11.9019	-6.55212	-12.3016	-6.24695	-5.80139	-10.1672	-10.0592	-5.72021
27.5	-11.9019	-6.53687	-12.3138	-6.24084	-5.80933	-10.1849	-10.0781	-5.71167
27.6	-11.9141	-6.53381	-12.3077	-6.22864	-5.82031	-10.1562	-10.0775	-5.71411
27.7	-11.908	-6.5155	-12.323	-6.2561	-5.80994	-10.191	-10.0818	-5.69275
27.8	-11.911	-6.52466	-12.3261	-6.25	-5.81299	-10.1941	-10.0684	-5.7135
27.9	-11.9202	-6.55518	-12.3169	-6.22864	-5.82153	-10.1849	-10.0909	-5.7196
28	-11.9141	-6.52771	-12.3352	-6.24695	-5.82825	-10.1947	-10.0732	-5.69458
28.1	-11.9354	-6.52161	-12.3627	-6.23474	-5.81421	-10.1825	-10.0806	-5.70618
28.2	-11.9354	-6.53992	-12.3291	-6.23169	-5.81665	-10.18	-10.0745	-5.70374
28.3	-11.9446	-6.55823	-12.3413	-6.24695	-5.82703	-10.1819	-10.1025	-5.71289
28.4	-11.9446	-6.53381	-12.3474	-6.2439	-5.81482	-10.2051	-10.0928	-5.71655
28.5	-11.9446	-6.53076	-12.3596	-6.22253	-5.82092	-10.2075	-10.097	-5.71106
28.6	-11.9263	-6.53076	-12.3505	-6.22253	-5.8313	-10.2002	-10.0928	-5.71411
28.7	-11.9568	-6.53076	-12.3474	-6.23779	-5.79956	-10.1929	-10.0891	-5.72205
28.8	-11.9324	-6.54297	-12.3627	-6.22253	-5.83618	-10.2118	-10.1031	-5.71045
28.9	-11.9659	-6.51855	-12.3779	-6.22253	-5.82458	-10.2069	-10.094	-5.7135
29	-11.9629	-6.54907	-12.384	-6.22559	-5.8374	-10.2142	-10.0989	-5.71472
29.1	-11.9629	-6.55823	-12.3749	-6.21033	-5.82031	-10.2118	-10.0977	-5.72693
29.2	-11.9995	-6.53992	-12.3749	-6.22253	-5.84412	-10.224	-10.1074	-5.71655
29.3	-11.9659	-6.53992	-12.3901	-6.21338	-5.81604	-10.1965	-10.1031	-5.71411
29.4	-11.9751	-6.54297	-12.3871	-6.21338	-5.82886	-10.2222	-10.0995	-5.71533
29.5	-11.9934	-6.53687	-12.3871	-6.21338	-5.82275	-10.21	-10.0934	-5.71228
29.6	-11.9842	-6.54907	-12.384	-6.20117	-5.81787	-10.221	-10.108	-5.72388
29.7	-11.9934	-6.53076	-12.4085	-6.20728	-5.82703	-10.2173	-10.0922	-5.71777
29.8	-12.0422	-6.55823	-12.3993	-6.22559	-5.81238	-10.2338	-10.1044	-5.72388
29.9	-11.9904	-6.54602	-12.4054	-6.20728	-5.82458	-10.224	-10.1135	-5.70618
30	-12.0148	-6.54602	-12.4054	-6.21338	-5.84045	-10.224	-10.1019	-5.72327
30.1	-12.027	-6.55823	-12.4054	-6.19812	-5.82092	-10.2368	-10.108	-5.72754
30.2	-12.0117	-6.54297	-12.4054	-6.19812	-5.83313	-10.238	-10.1117	-5.73792
30.3	-12.027	-6.56433	-12.4329	-6.21643	-5.82886	-10.2338	-10.1111	-5.69702
30.4	-12.0422	-6.54602	-12.4237	-6.19507	-5.83069	-10.2374	-10.1233	-5.72327
30.5	-12.027	-6.56433	-12.4146	-6.20117	-5.84656	-10.221	-10.0964	-5.71472
30.6	-12.0361	-6.54602	-12.4237	-6.19812	-5.84839	-10.2399	-10.1239	-5.71472
30.7	-12.0178	-6.53076	-12.4329	-6.19812	-5.84167	-10.2216	-10.1245	-5.7135
30.8	-12.0422	-6.54907	-12.4359	-6.19202	-5.83923	-10.2179	-10.1251	-5.7135
30.9	-12.0514	-6.55518	-12.4329	-6.20117	-5.849	-10.2332	-10.1178	-5.72327
31	-12.0727	-6.56433	-12.439	-6.17371	-5.8313	-10.235	-10.1227	-5.72205
31.1	-12.0575	-6.56433	-12.4268	-6.19812	-5.84473	-10.2252	-10.1343	-5.72021
31.2	-12.0422	-6.55518	-12.442	-6.21033	-5.84534	-10.2508	-10.1257	-5.70923
31.3	-12.0727	-6.53687	-12.442	-6.20728	-5.83313	-10.2197	-10.1233	-5.7251
31.4	-12.0514	-6.56433	-12.4359	-6.19507	-5.83191	-10.2295	-10.1263	-5.71838
31.5	-12.0911	-6.56433	-12.4542	-6.19812	-5.83069	-10.2356	-10.1172	-5.69702
31.6	-12.085	-6.56128	-12.4329	-6.19507	-5.84656	-10.2277	-10.1233	-5.70618
31.7	-12.0789	-6.56433	-12.4542	-6.19812	-5.84412	-10.2319	-10.1361	-5.72388
31.8	-12.0911	-6.56433	-12.4664	-6.17371	-5.85938	-10.2484	-10.1263	-5.72998
31.9	-12.0819	-6.56128	-12.4512	-6.19202	-5.84595	-10.2478	-10.1361	-5.72449
32	-12.0972	-6.55518	-12.4664	-6.18286	-5.83923	-10.2338	-10.1404	-5.70984
32.1	-12.1002	-6.5918	-12.4634	-6.17981	-5.84229	-10.2441	-10.144	-5.71777
32.2	-12.1033	-6.55212	-12.4664	-6.18896	-5.84167	-10.2429	-10.1318	-5.70557
32.3	-12.0972	-6.56433	-12.4664	-6.17676	-5.83862	-10.2417	-10.1233	-5.71228
32.4	-12.1094	-6.56433	-12.4786	-6.17981	-5.84595	-10.2386	-10.1392	-5.70923
32.5	-12.0819	-6.57959	-12.4664	-6.17371	-5.84717	-10.2338	-10.1282	-5.71289
32.6	-12.1063	-6.54602	-12.4756	-6.19202	-5.84167	-10.2484	-10.1373	-5.70984
32.7	-12.1063	-6.56128	-12.4664	-6.18286	-5.84106	-10.2386	-10.1325	-5.71106
32.8	-12.1033	-6.57043	-12.4908	-6.18286	-5.85083	-10.2466	-10.1343	-5.71899
32.9	-12.1216	-6.58569	-12.4847	-6.18591	-5.86548	-10.2423	-10.1386	-5.72693
33	-12.1185	-6.56433	-12.497	-6.17371	-5.83801	-10.2533	-10.1489	-5.71533
33.1	-12.1185	-6.56738	-12.4725	-6.18591	-5.85022	-10.2429	-10.1221	-5.72205
33.2	-12.1368	-6.58875	-12.5092	-6.17371	-5.84229	-10.2179	-10.1465	-5.70862
33.3	-12.1185	-6.58569	-12.497	-6.17981	-5.84534	-10.238	-10.163	-5.71472
33.4	-12.1368	-6.57043	-12.497	-6.15845	-5.83252	-10.2264	-10.1544	-5.70007
33.5	-12.1491	-6.61621	-12.4847	-6.19507	-5.849	-10.2399	-10.1569	-5.68909
33.6	-12.146	-6.58875	-12.5061	-6.17065	-5.82947	-10.246	-10.1477	-5.71106
33.7	-12.1552	-6.57654	-12.5122	-6.17676	-5.85022	-10.2557	-10.163	-5.70129
33.8	-12.1246	-6.58264	-12.5	-6.15845	-5.84412	-10.2527	-10.1599	-5.71777
33.9	-12.1552	-6.57043	-12.5214	-6.17371	-5.85571	-10.2472	-10.1471	-5.69702
34	-12.1521	-6.5918	-12.5214	-6.17981	-5.8606	-10.2417	-10.1489	-5.70618
34.1	-12.1216	-6.57959	-12.5061	-6.17371	-5.82275	-10.2637	-10.1447	-5.70374
34.2	-12.146	-6.57959	-12.5	-6.18286	-5.85632	-10.2411	-10.1471	-5.69824
34.3	-12.1735	-6.5918	-12.5244	-6.19202	-5.84351	-10.238	-10.1752	-5.70618
34.4	-12.1613	-6.57654	-12.5397	-6.18591	-5.83923	-10.2808	-10.1532	-5.71228
34.5	-12.1704	-6.60706	-12.5214	-6.17676	-5.84229	-10.2313	-10.1562	-5.69946
34.6	-12.1491	-6.58875	-12.5183	-6.1676	-5.85083	-10.249	-10.1544	-5.7019
34.7	-12.1704	-6.57349	-12.5397	-6.17676	-5.86304	-10.2472	-10.1727	-5.70618
34.8	-12.1491	-6.58569	-12.5427	-6.17676	-5.83801	-10.2478	-10.1666	-5.70801
34.9	-12.1826	-6.56738	-12.5275	-6.17065	-5.84167	-10.2515	-10.155	-5.70862
35	-12.1704	-6.57959	-12.5427	-6.17065	-5.84473	-10.2472	-10.152	-5.70068
35.1	-12.1826	-6.58569	-12.5519	-6.1676	-5.83313	-10.2325	-10.1685	-5.69763
35.2	-12.1765	-6.57959	-12.5519	-6.16455	-5.85144	-10.2466	-10.1672	-5.70984
35.3	-12.1857	-6.57654	-12.5397	-6.16455	-5.849	-10.2338	-10.1605	-5.69214
35.4	-12.1979	-6.56433	-12.5427	-6.17676	-5.83679	-10.2454	-10.1459	-5.70984
35.5	-12.1857	-6.57654	-12.5427	-6.1615	-5.849	-10.2399	-10.1642	-5.70435
35.6	-12.1948	-6.57959	-12.5397	-6.17371	-5.83374	-10.2563	-10.1453	-5.71594
35.7	-12.1918	-6.57349	-12.5397	-6.14929	-5.85266	-10.257	-10.1642	-5.70251
35.8	-12.2162	-6.604	-12.5519	-6.15845	-5.84412	-10.2441	-10.1648	-5.70435
35.9	-12.2101	-6.5979	-12.558	-6.15845	-5.82947	-10.2655	-10.1758	-5.70496
36	-12.2162	-6.56738	-12.561	-6.1615	-5.85632	-10.2393	-10.1709	-5.69519
36.1	-12.1979	-6.58875	-12.5519	-6.1615	-5.83923	-10.2472	-10.1678	-5.70618
36.2	-12.2253	-6.58569	-12.558	-6.1615	-5.85144	-10.2441	-10.1727	-5.71472
36.3	-12.2162	-6.58264	-12.558	-6.1615	-5.83984	-10.2527	-10.1727	-5.69519
36.4	-12.1948	-6.57959	-12.561	-6.1615	-5.85632	-10.2441	-10.1605	-5.69702
36.5	-12.2009	-6.59485	-12.5702	-6.1615	-5.83435	-10.2661	-10.1776	-5.71838
36.6	-12.2559	-6.58875	-12.5641	-6.15845	-5.849	-10.2484	-10.1562	-5.71167
36.7	-12.2162	-6.60706	-12.5702	-6.17981	-5.85266	-10.2399	-10.163	-5.69092
36.8	-12.2223	-6.5918	-12.561	-6.1676	-5.83008	-10.2502	-10.1874	-5.70251
36.9	-12.2437	-6.58569	-12.5793	-6.15845	-5.83435	-10.2472	-10.1605	-5.71472
37	-12.2376	-6.62842	-12.558	-6.17065	-5.83252	-10.2741	-10.177	-5.70801
37.1	-12.2498	-6.61011	-12.5885	-6.1554	-5.849	-10.2441	-10.1508	-5.69824
37.2	-12.2498	-6.61621	-12.5488	-6.17065	-5.84839	-10.2557	-10.188	-5.7074
37.3	-12.2437	-6.59485	-12.5763	-6.1676	-5.82642	-10.2521	-10.163	-5.70251
37.4	-12.2467	-6.60095	-12.5702	-6.14929	-5.83679	-10.2582	-10.1965	-5.69275
37.5	-12.2528	-6.58875	-12.5702	-6.1554	-5.83252	-10.2545	-10.1642	-5.70374
37.6	-12.265	-6.61316	-12.5671	-6.1554	-5.83496	-10.2508	-10.1617	-5.7074
37.7	-12.2681	-6.5979	-12.5702	-6.1554	-5.83923	-10.2631	-10.155	-5.69397
37.8	-12.2467	-6.60706	-12.5793	-6.1554	-5.84534	-10.2484	-10.1733	-5.69763
37.9	-12.2528	-6.5979	-12.5732	-6.15234	-5.83618	-10.2466	-10.1709	-5.70862
38	-12.262	-6.60095	-12.5732	-6.15234	-5.8429	-10.2338	-10.1691	-5.69641
38.1	-12.2711	-6.58569	-12.5702	-6.14014	-5.85693	-10.2454	-10.1764	-5.70435
38.2	-12.262	-6.62231	-12.5732	-6.1554	-5.8374	-10.2368	-10.1611	-5.70007
38.3	-12.265	-6.604	-12.5824	-6.1615	-5.83984	-10.2539	-10.1752	-5.69458
38.4	-12.2772	-6.604	-12.5793	-6.1554	-5.83862	-10.2295	-10.1849	-5.69275
38.5	-12.2742	-6.604	-12.5641	-6.14319	-5.83557	-10.2466	-10.1685	-5.71106
38.6	-12.2864	-6.60706	-12.5671	-6.14929	-5.84656	-10.2563	-10.1862	-5.69702
38.7	-12.2498	-6.61926	-12.5854	-6.15845	-5.82581	-10.2417	-10.1886	-5.71655
38.8	-12.2894	-6.60095	-12.5641	-6.1554	-5.84351	-10.249	-10.1849	-5.69824
38.9	-12.2803	-6.61316	-12.6007	-6.14624	-5.84045	-10.2447	-10.1782	-5.69519
39	-12.2894	-6.61011	-12.5946	-6.15234	-5.83191	-10.2588	-10.1752	-5.70862
39.1	-12.2864	-6.61316	-12.5763	-6.13098	-5.8313	-10.2594	-10.1825	-5.71106
39.2	-12.3016	-6.5918	-12.5793	-6.14624	-5.83435	-10.2624	-10.1752	-5.70251
39.3	-12.2986	-6.60706	-12.5824	-6.14014	-5.83496	-10.2759	-10.1923	-5.71655
39.4	-12.2925	-6.61316	-12.5946	-6.14929	-5.85144	-10.2698	-10.1599	-5.69641
39.5	-12.2833	-6.61011	-12.5885	-6.13708	-5.83435	-10.2533	-10.1788	-5.71716
39.6	-12.32	-6.61011	-12.5702	-6.12488	-5.8313	-10.2484	-10.1544	-5.70068
39.7	-12.2925	-6.5979	-12.5885	-6.12793	-5.849	-10.2533	-10.1666	-5.70862
39.8	-12.3047	-6.61621	-12.5824	-6.14319	-5.84106	-10.2631	-10.1599	-5.6958
39.9	-12.2925	-6.5979	-12.5915	-6.14319	-5.8374	-10.2551	-10.1788	-5.69946
40	-12.323	-6.604	-12.5824	-6.13708	-5.82886	-10.2631	-10.177	-5.7019
40.1	-12.2864	-6.61011	-12.5915	-6.12793	-5.83984	-10.2393	-10.1959	-5.70801
40.2	-12.3138	-6.61621	-12.5702	-6.13708	-5.83679	-10.2692	-10.1904	-5.6842
40.3	-12.2955	-6.60706	-12.5702	-6.13708	-5.83618	-10.2484	-10.1739	-5.70251
40.4	-12.3108	-6.58875	-12.5854	-6.14014	-5.84229	-10.2893	-10.1898	-5.70679
40.5	-12.3077	-6.61011	-12.5763	-6.13708	-5.85449	-10.2637	-10.1886	-5.69214
40.6	-12.3077	-6.60095	-12.5763	-6.13098	-5.8374	-10.2533	-10.1825	-5.70984
40.7	-12.3322	-6.60095	-12.5885	-6.13403	-5.8429	-10.2692	-10.1758	-5.70679
40.8	-12.2955	-6.62537	-12.5885	-6.12488	-5.83435	-10.2661	-10.1862	-5.70923
40.9	-12.3535	-6.5979	-12.5824	-6.12793	-5.84106	-10.2557	-10.191	-5.71167
41	-12.3169	-6.61011	-12.5946	-6.14929	-5.83435	-10.2508	-10.1715	-5.69519
41.1	-12.32	-6.61621	-12.5977	-6.11572	-5.84167	-10.2624	-10.1855	-5.71472
41.2	-12.3291	-6.58875	-12.5977	-6.12488	-5.82092	-10.2673	-10.1892	-5.70679
41.3	-12.3261	-6.604	-12.5885	-6.13098	-5.82947	-10.2515	-10.1825	-5.71228
41.4	-12.3352	-6.5979	-12.6038	-6.13098	-5.84167	-10.2673	-10.166	-5.71716
41.5	-12.3383	-6.60095	-12.5915	-6.12793	-5.84045	-10.26	-10.1794	-5.70923
41.6	-12.3627	-6.59485	-12.5977	-6.11572	-5.83618	-10.2655	-10.1636	-5.71289
41.7	-12.3566	-6.5979	-12.5793	-6.11877	-5.82764	-10.2783	-10.1746	-5.69946
41.8	-12.3352	-6.604	-12.5854	-6.12488	-5.83801	-10.2631	-10.1959	-5.70068
41.9	-12.3627	-6.61926	-12.5915	-6.12793	-5.84717	-10.2795	-10.199	-5.70435
42	-12.3291	-6.604	-12.5915	-6.12488	-5.83252	-10.2679	-10.1709	-5.70862
42.1	-12.3505	-6.604	-12.5915	-6.10962	-5.83618	-10.2612	-10.1685	-5.68481
42.2	-12.3352	-6.60095	-12.5793	-6.13098	-5.8374	-10.2789	-10.1868	-5.70313
42.3	-12.3474	-6.62537	-12.6068	-6.12488	-5.82214	-10.2814	-10.188	-5.71411
42.4	-12.3413	-6.604	-12.5977	-6.10657	-5.849	-10.2698	-10.18	-5.71289
42.5	-12.3505	-6.61621	-12.6038	-6.11267	-5.84045	-10.2722	-10.1886	-5.70679
42.6	-12.3688	-6.58569	-12.5824	-6.11267	-5.83313	-10.2808	-10.177	-5.69397
42.7	-12.3596	-6.5918	-12.5793	-6.11267	-5.83557	-10.2765	-10.1862	-5.71228
42.8	-12.3566	-6.58875	-12.5915	-6.10352	-5.8374	-10.2783	-10.1697	-5.70007
42.9	-12.3962	-6.604	-12.6068	-6.10046	-5.82886	-10.2759	-10.1776	-5.70618
43	-12.3444	-6.60706	-12.5702	-6.11877	-5.82336	-10.282	-10.166	-5.71472
43.1	-12.381	-6.61011	-12.5977	-6.11267	-5.84229	-10.2673	-10.1788	-5.7196
43.2	-12.3901	-6.59485	-12.5854	-6.10657	-5.83435	-10.293	-10.1758	-5.70496
43.3	-12.3688	-6.5918	-12.5946	-6.11267	-5.81665	-10.293	-10.1819	-5.70618
43.4	-12.3901	-6.5979	-12.5915	-6.11267	-5.84229	-10.2777	-10.1904	-5.69397
43.5	-12.3871	-6.60095	-12.5854	-6.12488	-5.82336	-10.2887	-10.1794	-5.69336
43.6	-12.3627	-6.57654	-12.5824	-6.10352	-5.83984	-10.285	-10.1886	-5.70496
43.7	-12.3718	-6.60095	-12.5854	-6.11267	-5.82886	-10.2979	-10.1977	-5.69458
43.8	-12.3749	-6.604	-12.5854	-6.10657	-5.83252	-10.293	-10.1892	-5.70435
43.9	-12.3932	-6.60706	-12.5977	-6.10352	-5.82947	-10.2844	-10.1831	-5.70251
44	-12.3749	-6.60095	-12.5977	-6.11572	-5.82153	-10.2844	-10.1819	-5.71411
44.1	-12.4023	-6.58264	-12.5702	-6.09741	-5.83496	-10.2759	-10.188	-5.7019
44.2	-12.3871	-6.61621	-12.5854	-6.09741	-5.82458	-10.3033	-10.1929	-5.70801
44.3	-12.4023	-6.57654	-12.6007	-6.09436	-5.84167	-10.285	-10.1892	-5.70984
44.4	-12.3779	-6.5979	-12.5885	-6.10962	-5.82642	-10.285	-10.191	-5.70923
44.5	-12.3932	-6.61316	-12.5977	-6.09741	-5.82275	-10.2954	-10.1935	-5.70679
44.6	-12.3932	-6.59485	-12.6038	-6.11267	-5.83313	-10.2838	-10.1752	-5.70496
44.7	-12.3901	-6.60706	-12.5915	-6.09741	-5.83435	-10.2771	-10.177	-5.71411
44.8	-12.3962	-6.5918	-12.5946	-6.10657	-5.81726	-10.2881	-10.1697	-5.70557
44.9	-12.381	-6.57959	-12.5915	-6.10046	-5.82703	-10.2972	-10.1782	-5.69702
45	-12.4115	-6.59485	-12.5915	-6.09131	-5.82336	-10.2814	-10.1849	-5.69885
45.1	-12.3993	-6.58264	-12.6007	-6.09436	-5.8197	-10.2942	-10.1831	-5.71228
45.2	-12.4146	-6.58875	-12.5824	-6.10046	-5.8313	-10.2899	-10.18	-5.70862
45.3	-12.3871	-6.60706	-12.5915	-6.09436	-5.8197	-10.2881	-10.1862	-5.6958
45.4	-12.4146	-6.57349	-12.5854	-6.09131	-5.82581	-10.3046	-10.2106	-5.71472
45.5	-12.4023	-6.57959	-12.6007	-6.10352	-5.80933	-10.3003	-10.1843	-5.70923
45.6	-12.4054	-6.58875	-12.6068	-6.11267	-5.82397	-10.2985	-10.1727	-5.6897
45.7	-12.4115	-6.57043	-12.6038	-6.09741	-5.82703	-10.3009	-10.1697	-5.70862
45.8	-12.4146	-6.57959	-12.6007	-6.10046	-5.83313	-10.3027	-10.1971	-5.70618
45.9	-12.4085	-6.58264	-12.5915	-6.09436	-5.82275	-10.296	-10.191	-5.70374
46	-12.4237	-6.5918	-12.5885	-6.10046	-5.82886	-10.2899	-10.1807	-5.69702
46.1	-12.4176	-6.58569	-12.6068	-6.10352	-5.82031	-10.2936	-10.2008	-5.70801
46.2	-12.4237	-6.56738	-12.5946	-6.09131	-5.81909	-10.2936	-10.199	-5.70862
46.3	-12.4146	-6.5918	-12.5946	-6.09436	-5.83618	-10.3003	-10.1898	-5.7074
46.4	-12.4176	-6.57654	-12.5732	-6.10046	-5.82703	-10.3058	-10.188	-5.69641
46.5	-12.4237	-6.57959	-12.5977	-6.09131	-5.8136	-10.2985	-10.1947	-5.70557
46.6	-12.4329	-6.58264	-12.6007	-6.09131	-5.82886	-10.3125	-10.1996	-5.71106
46.7	-12.4176	-6.5979	-12.5885	-6.10657	-5.80811	-10.2997	-10.2081	-5.70984
46.8	-12.4237	-6.56738	-12.5854	-6.08521	-5.82581	-10.3095	-10.1825	-5.70313
46.9	-12.4207	-6.58875	-12.6007	-6.08826	-5.83008	-10.3064	-10.2014	-5.70557
47	-12.4176	-6.57654	-12.5793	-6.09131	-5.80444	-10.2979	-10.202	-5.70251
47.1	-12.4176	-6.58264	-12.6038	-6.08826	-5.82153	-10.2997	-10.191	-5.68848
47.2	-12.4237	-6.59485	-12.5824	-6.09131	-5.81299	-10.2918	-10.1862	-5.67932
47.3	-12.4329	-6.58875	-12.5854	-6.08215	-5.82642	-10.3143	-10.1898	-5.70496
47.4	-12.4146	-6.57959	-12.5946	-6.10046	-5.81299	-10.2972	-10.1996	-5.67993
47.5	-12.4298	-6.58875	-12.5885	-6.08826	-5.82336	-10.3143	-10.1825	-5.68542
47.6	-12.4359	-6.55212	-12.5854	-6.08826	-5.82031	-10.282	-10.2087	-5.68787
47.7	-12.4359	-6.57654	-12.5824	-6.09741	-5.80872	-10.2918	-10.1971	-5.69092
47.8	-12.4237	-6.58264	-12.5915	-6.08521	-5.81848	-10.2924	-10.188	-5.69458
47.9	-12.439	-6.57959	-12.5793	-6.08826	-5.82703	-10.293	-10.2014	-5.69275
48	-12.4207	-6.56738	-12.5763	-6.08826	-5.80139	-10.2972	-10.1849	-5.69702
48.1	-12.4542	-6.57959	-12.5946	-6.09741	-5.82764	-10.2905	-10.1953	-5.68481
48.2	-12.442	-6.57654	-12.5854	-6.08215	-5.81116	-10.2918	-10.1965	-5.67505
48.3	-12.4268	-6.58875	-12.6007	-6.08826	-5.81665	-10.2985	-10.1904	-5.69153
48.4	-12.4512	-6.55518	-12.6007	-6.09741	-5.82397	-10.2918	-10.2051	-5.69519
48.5	-12.4481	-6.58875	-12.5977	-6.08521	-5.80627	-10.2948	-10.1959	-5.67749
48.6	-12.4512	-6.58264	-12.5946	-6.06689	-5.83496	-10.296	-10.188	-5.6897
48.7	-12.4634	-6.57654	-12.5946	-6.09741	-5.81299	-10.2783	-10.1941	-5.67871
48.8	-12.4481	-6.59485	-12.6007	-6.10046	-5.82336	-10.304	-10.2002	-5.67932
48.9	-12.439	-6.56128	-12.5946	-6.08521	-5.81848	-10.3052	-10.1898	-5.68604
49	-12.4207	-6.55518	-12.5946	-6.08521	-5.82642	-10.2741	-10.2045	-5.68298
49.1	-12.442	-6.57349	-12.6221	-6.08826	-5.81848	-10.2869	-10.1996	-5.68787
49.2	-12.4573	-6.58875	-12.6007	-6.08521	-5.81726	-10.3033	-10.1941	-5.68665
49.3	-12.4634	-6.58875	-12.5946	-6.09436	-5.81482	-10.2924	-10.2002	-5.67444
49.4	-12.4542	-6.56433	-12.6129	-6.06689	-5.81299	-10.2881	-10.1916	-5.66711
49.5	-12.4603	-6.58264	-12.5763	-6.09131	-5.80933	-10.2936	-10.2057	-5.65796
49.6	-12.4451	-6.58875	-12.5946	-6.073	-5.82642	-10.3082	-10.1953	-5.69336
49.7	-12.4573	-6.57654	-12.6038	-6.08215	-5.8252	-10.3009	-10.2045	-5.67261
49.8	-12.4481	-6.57043	-12.5977	-6.08215	-5.80688	-10.3003	-10.191	-5.65918
49.9	-12.4603	-6.58264	-12.5793	-6.08826	-5.81116	-10.2795	-10.2039	-5.67078
50	-12.4634	-6.57349	-12.616	-6.08215	-5.82092	-10.2905	-10.1984	-5.66284
50.1	-12.4573	-6.5918	-12.6007	-6.0791	-5.80383	-10.2942	-10.1971	-5.6842
50.2	-12.4664	-6.57349	-12.5946	-6.0791	-5.81238	-10.2759	-10.2112	-5.67871
50.3	-12.4664	-6.58875	-12.6099	-6.09741	-5.81421	-10.2948	-10.2057	-5.6543
50.4	-12.4725	-6.55212	-12.6038	-6.09131	-5.80383	-10.307	-10.1874	-5.65979
50.5	-12.4664	-6.58569	-12.6099	-6.09131	-5.81482	-10.2789	-10.2142	-5.66833
50.6	-12.4878	-6.56128	-12.6099	-6.0791	-5.79346	-10.293	-10.1874	-5.68054
50.7	-12.4573	-6.57043	-12.5946	-6.0791	-5.81787	-10.2972	-10.2057	-5.6665
50.8	-12.4817	-6.58569	-12.5946	-6.0791	-5.80566	-10.2881	-10.1947	-5.67627
50.9	-12.4725	-6.55518	-12.6221	-6.10657	-5.79895	-10.2918	-10.188	-5.65247
51	-12.4817	-6.56433	-12.5977	-6.08826	-5.79895	-10.2893	-10.2094	-5.67017
51.1	-12.4634	-6.58264	-12.6068	-6.09741	-5.81299	-10.2771	-10.2124	-5.66589
51.2	-12.4908	-6.57654	-12.619	-6.08826	-5.79468	-10.3015	-10.2051	-5.65247
51.3	-12.4786	-6.55518	-12.5915	-6.08826	-5.8252	-10.2844	-10.2039	-5.67078
51.4	-12.4756	-6.57654	-12.6007	-6.08521	-5.80994	-10.2802	-10.2142	-5.65063
51.5	-12.5092	-6.56433	-12.6007	-6.08826	-5.80811	-10.3003	-10.1996	-5.65369
51.6	-12.4817	-6.58569	-12.5885	-6.08826	-5.80505	-10.3058	-10.2008	-5.65674
51.7	-12.4817	-6.56128	-12.6038	-6.09741	-5.81726	-10.2942	-10.1923	-5.6543
51.8	-12.497	-6.56433	-12.6068	-6.10657	-5.81055	-10.2893	-10.1959	-5.66467
51.9	-12.4817	-6.53992	-12.616	-6.06995	-5.81116	-10.2802	-10.2112	-5.66284
52	-12.4847	-6.56128	-12.6038	-6.0791	-5.80139	-10.2948	-10.2063	-5.67139
52.1	-12.5122	-6.57043	-12.6129	-6.09131	-5.8136	-10.2936	-10.2045	-5.65002
52.2	-12.4817	-6.55518	-12.6038	-6.0791	-5.80933	-10.2863	-10.1941	-5.65369
52.3	-12.4878	-6.57959	-12.6007	-6.07605	-5.81726	-10.2911	-10.1935	-5.66956
52.4	-12.5092	-6.55518	-12.6129	-6.08521	-5.79346	-10.3003	-10.1807	-5.65552
52.5	-12.4939	-6.57043	-12.6038	-6.09436	-5.80383	-10.2875	-10.2051	-5.65186
52.6	-12.4908	-6.55823	-12.5854	-6.09131	-5.80872	-10.2667	-10.2087	-5.65491
52.7	-12.5092	-6.56738	-12.6007	-6.10657	-5.78979	-10.2979	-10.1971	-5.65613
52.8	-12.4817	-6.56433	-12.6221	-6.08521	-5.81299	-10.2893	-10.1855	-5.64575
52.9	-12.4908	-6.56738	-12.5946	-6.09131	-5.79407	-10.2936	-10.199	-5.65002
53	-12.503	-6.55212	-12.5977	-6.10657	-5.80444	-10.2954	-10.2026	-5.67139
53.1	-12.4908	-6.56738	-12.619	-6.073	-5.81177	-10.2777	-10.188	-5.64148
53.2	-12.4817	-6.56738	-12.5977	-6.09741	-5.81665	-10.2887	-10.1752	-5.66101
53.3	-12.4908	-6.58569	-12.6129	-6.08826	-5.79163	-10.2808	-10.1849	-5.67139
53.4	-12.4817	-6.58569	-12.6099	-6.06995	-5.7959	-10.2741	-10.2057	-5.66284
53.5	-12.5061	-6.56433	-12.6007	-6.10046	-5.8075	-10.2954	-10.1947	-5.65857
53.6	-12.5	-6.56128	-12.5977	-6.08826	-5.79651	-10.2893	-10.1935	-5.64026
53.7	-12.4817	-6.57654	-12.6038	-6.09131	-5.80444	-10.271	-10.1971	-5.65918
53.8	-12.497	-6.58264	-12.6038	-6.09131	-5.79712	-10.2924	-10.199	-5.65552
53.9	-12.5	-6.56128	-12.6038	-6.08826	-5.79529	-10.2716	-10.2063	-5.6488
54	-12.5	-6.57349	-12.5915	-6.08521	-5.80017	-10.2765	-10.1898	-5.66406
54.1	-12.5	-6.56433	-12.5977	-6.06995	-5.79773	-10.2875	-10.1929	-5.65002
54.2	-12.5	-6.56738	-12.5977	-6.09131	-5.80261	-10.2783	-10.1971	-5.65063
54.3	-12.5122	-6.56433	-12.6068	-6.08826	-5.79651	-10.2863	-10.1813	-5.65125
54.4	-12.5122	-6.57043	-12.6068	-6.08215	-5.80994	-10.2753	-10.1984	-5.65063
54.5	-12.4908	-6.56738	-12.6068	-6.073	-5.80261	-10.2991	-10.2057	-5.64636
54.6	-12.5	-6.56738	-12.6007	-6.09131	-5.81177	-10.285	-10.2014	-5.65308
54.7	-12.5092	-6.56128	-12.6099	-6.0791	-5.81299	-10.2954	-10.1904	-5.64026
54.8	-12.497	-6.56738	-12.5885	-6.06689	-5.79895	-10.2832	-10.1892	-5.65552
54.9	-12.5122	-6.55212	-12.5885	-6.08521	-5.80261	-10.293	-10.1813	-5.65979
55	-12.4939	-6.57043	-12.6129	-6.06689	-5.82153	-10.2789	-10.1923	-5.65369
55.1	-12.5183	-6.54907	-12.6007	-6.07605	-5.78674	-10.2582	-10.1977	-5.65125
55.2	-12.5214	-6.55823	-12.5977	-6.0791	-5.7959	-10.2893	-10.2069	-5.64026
55.3	-12.5153	-6.55518	-12.6068	-6.08521	-5.80566	-10.2979	-10.1886	-5.65613
55.4	-12.5183	-6.56738	-12.6099	-6.09436	-5.80872	-10.2673	-10.1862	-5.63904
55.5	-12.5122	-6.54602	-12.5915	-6.06995	-5.81116	-10.2673	-10.1977	-5.65308
55.6	-12.5244	-6.55823	-12.5915	-6.06995	-5.78613	-10.2954	-10.1965	-5.66162
55.7	-12.5092	-6.55212	-12.6068	-6.08215	-5.82031	-10.282	-10.1855	-5.64941
55.8	-12.503	-6.53992	-12.6068	-6.08215	-5.80322	-10.2893	-10.1898	-5.6427
55.9	-12.5366	-6.55212	-12.6007	-6.073	-5.78918	-10.2881	-10.2002	-5.67017
56	-12.5366	-6.56128	-12.6007	-6.08215	-5.79407	-10.2673	-10.1794	-5.64636
56.1	-12.5183	-6.54907	-12.5977	-6.07605	-5.80444	-10.2692	-10.1996	-5.65247
56.2	-12.5122	-6.55212	-12.5915	-6.06995	-5.80261	-10.2789	-10.202	-5.65063
56.3	-12.5153	-6.55823	-12.6007	-6.06995	-5.78918	-10.2808	-10.1746	-5.63843
56.4	-12.5061	-6.54297	-12.6068	-6.06995	-5.79651	-10.2948	-10.188	-5.65063
56.5	-12.5397	-6.53687	-12.6068	-6.0791	-5.79468	-10.2759	-10.2002	-5.63721
56.6	-12.5122	-6.55823	-12.5915	-6.08215	-5.78735	-10.2734	-10.1776	-5.64148
56.7	-12.5244	-6.55823	-12.6038	-6.06995	-5.80261	-10.282	-10.1916	-5.63477
56.8	-12.5183	-6.54297	-12.5885	-6.06079	-5.78735	-10.3003	-10.1837	-5.65247
56.9	-12.5	-6.53992	-12.6007	-6.0791	-5.80505	-10.2911	-10.2033	-5.65186
57	-12.5336	-6.54602	-12.5977	-6.07605	-5.80383	-10.2948	-10.2008	-5.63965
57.1	-12.5214	-6.54297	-12.5854	-6.06384	-5.79529	-10.2802	-10.1862	-5.6488
57.2	-12.5092	-6.52466	-12.5977	-6.06384	-5.79773	-10.293	-10.1977	-5.6543
57.3	-12.5214	-6.55212	-12.5885	-6.073	-5.78735	-10.2777	-10.18	-5.63354
57.4	-12.5366	-6.55212	-12.5946	-6.073	-5.7959	-10.2899	-10.1941	-5.64697
57.5	-12.5275	-6.54297	-12.5854	-6.06079	-5.80139	-10.2783	-10.202	-5.64758
57.6	-12.5366	-6.55823	-12.5946	-6.06689	-5.78735	-10.2789	-10.1947	-5.63782
57.7	-12.5305	-6.54602	-12.5885	-6.06689	-5.80261	-10.2936	-10.1886	-5.6488
57.8	-12.5458	-6.54602	-12.5854	-6.08215	-5.79834	-10.3021	-10.1996	-5.63782
57.9	-12.497	-6.54297	-12.5824	-6.06079	-5.78064	-10.2832	-10.1837	-5.65735
58	-12.5488	-6.54297	-12.5946	-6.073	-5.79651	-10.2942	-10.1868	-5.65186
58.1	-12.5458	-6.52771	-12.5946	-6.06689	-5.78857	-10.2911	-10.2081	-5.64636
58.2	-12.5244	-6.52771	-12.5763	-6.05164	-5.77271	-10.2753	-10.2014	-5.65857
58.3	-12.5397	-6.53992	-12.5854	-6.06689	-5.80994	-10.2887	-10.1892	-5.65552
58.4	-12.5366	-6.55212	-12.5885	-6.06689	-5.79529	-10.3009	-10.1916	-5.65186
58.5	-12.5305	-6.53381	-12.5885	-6.08215	-5.78003	-10.2869	-10.1965	-5.66162
58.6	-12.5458	-6.53687	-12.5977	-6.06079	-5.79285	-10.2979	-10.188	-5.64026
58.7	-12.5305	-6.5155	-12.6007	-6.05774	-5.7843	-10.2924	-10.2014	-5.64331
58.8	-12.5305	-6.53381	-12.5793	-6.073	-5.79163	-10.2936	-10.1965	-5.63904
58.9	-12.5305	-6.55212	-12.5824	-6.06995	-5.79773	-10.2747	-10.1996	-5.62378
59	-12.5336	-6.52161	-12.5854	-6.05774	-5.79834	-10.2991	-10.1984	-5.65369
59.1	-12.5549	-6.53992	-12.5977	-6.06384	-5.78979	-10.2838	-10.2045	-5.6488
59.2	-12.5275	-6.54297	-12.5763	-6.05164	-5.78857	-10.2832	-10.202	-5.63599
59.3	-12.5305	-6.54602	-12.5854	-6.04248	-5.79285	-10.2924	-10.1788	-5.64209
59.4	-12.5214	-6.52466	-12.5915	-6.05469	-5.79529	-10.2954	-10.2026	-5.65308
59.5	-12.5305	-6.52466	-12.5732	-6.05774	-5.78552	-10.2875	-10.2045	-5.6366
59.6	-12.5488	-6.52466	-12.5671	-6.04858	-5.77209	-10.2905	-10.2033	-5.65002
59.7	-12.558	-6.53992	-12.5885	-6.06384	-5.78064	-10.2802	-10.1862	-5.64453
59.8	-12.5305	-6.53381	-12.5854	-6.03943	-5.77087	-10.3088	-10.1916	-5.65125
59.9	-12.5366	-6.54602	-12.5793	-6.04553	-5.78064	-10.2795	-10.1965	-5.63293
60	-12.5397	-6.52466	-12.5702	-6.05164	-5.76904	-10.2899	-10.1935	-5.63293
60.1	-12.561	-6.54602	-12.5854	-6.05469	-5.77515	-10.2863	-10.2045	-5.63782
60.2	-12.5458	-6.53687	-12.5763	-6.05774	-5.77026	-10.2911	-10.1959	-5.6189
60.3	-12.5397	-6.53687	-12.6068	-6.03943	-5.78674	-10.2875	-10.1868	-5.63477
60.4	-12.5488	-6.52771	-12.5977	-6.05469	-5.77393	-10.2948	-10.188	-5.62439
60.5	-12.5549	-6.49719	-12.5854	-6.05469	-5.77087	-10.2924	-10.1953	-5.64514
60.6	-12.5549	-6.54297	-12.5793	-6.04858	-5.77942	-10.296	-10.1855	-5.64209
60.7	-12.5641	-6.53381	-12.5915	-6.04553	-5.7782	-10.2985	-10.2051	-5.64514
60.8	-12.5488	-6.52161	-12.5793	-6.06079	-5.7843	-10.2979	-10.1916	-5.62317
60.9	-12.5397	-6.53687	-12.5793	-6.03638	-5.76111	-10.3101	-10.2081	-5.64392
61	-12.5671	-6.52161	-12.5763	-6.04248	-5.79407	-10.2905	-10.1849	-5.6604
61.1	-12.5519	-6.53076	-12.5793	-6.04858	-5.7782	-10.3076	-10.202	-5.64392
61.2	-12.558	-6.52161	-12.5793	-6.04858	-5.76782	-10.3021	-10.1941	-5.63721
61.3	-12.5458	-6.52161	-12.5915	-6.04248	-5.78613	-10.3174	-10.2075	-5.64331
61.4	-12.5488	-6.51245	-12.5824	-6.05774	-5.78491	-10.3003	-10.1886	-5.62683
61.5	-12.5641	-6.5155	-12.5793	-6.03333	-5.77576	-10.2979	-10.2026	-5.62561
61.6	-12.5366	-6.5094	-12.5793	-6.05469	-5.7782	-10.2856	-10.1984	-5.62927
61.7	-12.558	-6.5094	-12.5793	-6.04858	-5.77454	-10.2777	-10.1892	-5.63599
61.8	-12.5427	-6.5033	-12.5763	-6.04553	-5.78247	-10.293	-10.1941	-5.62988
61.9	-12.5519	-6.51245	-12.5763	-6.03333	-5.77515	-10.3003	-10.1965	-5.62927
62	-12.5366	-6.50024	-12.5763	-6.04858	-5.77271	-10.2972	-10.2075	-5.63293
62.1	-12.5641	-6.5155	-12.5854	-6.03333	-5.77393	-10.3131	-10.1904	-5.63232
62.2	-12.5549	-6.48804	-12.5793	-6.05469	-5.78125	-10.2966	-10.2148	-5.62744
62.3	-12.5336	-6.50635	-12.6038	-6.03943	-5.77393	-10.3259	-10.1874	-5.63049
62.4	-12.5397	-6.5094	-12.6007	-6.05774	-5.78064	-10.2942	-10.1971	-5.64087
62.5	-12.558	-6.51855	-12.6007	-6.03638	-5.76294	-10.3046	-10.1916	-5.6311
62.6	-12.5549	-6.49719	-12.5854	-6.05469	-5.76843	-10.2997	-10.1996	-5.62256
62.7	-12.5397	-6.50635	-12.5763	-6.04858	-5.77332	-10.2979	-10.1984	-5.63904
62.8	-12.561	-6.5155	-12.5915	-6.05469	-5.76355	-10.3033	-10.1959	-5.63599
62.9	-12.5519	-6.49719	-12.5824	-6.03333	-5.75867	-10.3168	-10.1953	-5.62073
63	-12.5549	-6.5033	-12.6068	-6.03943	-5.77942	-10.2918	-10.1953	-5.65063
63.1	-12.5458	-6.50635	-12.5793	-6.05469	-5.77087	-10.3015	-10.1959	-5.63049
63.2	-12.558	-6.5094	-12.5854	-6.04858	-5.76965	-10.3058	-10.188	-5.64941
63.3	-12.5702	-6.48804	-12.5824	-6.03943	-5.77148	-10.3027	-10.2026	-5.62927
63.4	-12.561	-6.50024	-12.5854	-6.04248	-5.77698	-10.3003	-10.1929	-5.62744
63.5	-12.5793	-6.5094	-12.5763	-6.06079	-5.75684	-10.3314	-10.2014	-5.63171
63.6	-12.5519	-6.5155	-12.5946	-6.03027	-5.75562	-10.3082	-10.1947	-5.62927
63.7	-12.5732	-6.49414	-12.5763	-6.04248	-5.76172	-10.3155	-10.1929	-5.61096
63.8	-12.5793	-6.5155	-12.5763	-6.05469	-5.75867	-10.2948	-10.1984	-5.61584
63.9	-12.5488	-6.47278	-12.5854	-6.03943	-5.77332	-10.3192	-10.1916	-5.63232
64	-12.5641	-6.51245	-12.5671	-6.03943	-5.75806	-10.3021	-10.1935	-5.63232
64.1	-12.5641	-6.50635	-12.5793	-6.03943	-5.76904	-10.3052	-10.2057	-5.61157
64.2	-12.561	-6.50024	-12.5977	-6.04858	-5.74463	-10.307	-10.2081	-5.62439
64.3	-12.5397	-6.5094	-12.5732	-6.04553	-5.7666	-10.285	-10.1825	-5.62256
64.4	-12.558	-6.49109	-12.5915	-6.04858	-5.75012	-10.321	-10.2033	-5.61035
64.5	-12.5854	-6.49719	-12.5915	-6.04248	-5.76477	-10.2918	-10.2008	-5.61829
64.6	-12.5366	-6.50024	-12.5793	-6.04553	-5.75623	-10.3174	-10.2039	-5.61646
64.7	-12.5763	-6.50024	-12.5763	-6.03943	-5.77637	-10.3015	-10.1923	-5.6366
64.8	-12.5641	-6.49109	-12.5915	-6.04248	-5.76416	-10.3253	-10.2081	-5.62805
64.9	-12.5671	-6.49414	-12.5915	-6.04858	-5.75256	-10.3143	-10.1977	-5.62195
65	-12.5641	-6.5155	-12.5793	-6.05164	-5.76965	-10.3143	-10.2026	-5.61829
65.1	-12.5671	-6.49719	-12.5854	-6.03638	-5.77759	-10.2948	-10.2136	-5.63477
65.2	-12.5641	-6.5033	-12.5946	-6.04248	-5.75867	-10.3064	-10.199	-5.61401
65.3	-12.5763	-6.48193	-12.5824	-6.05164	-5.76416	-10.293	-10.1996	-5.61829
65.4	-12.5763	-6.49719	-12.5885	-6.02722	-5.76782	-10.3027	-10.1947	-5.61218
65.5	-12.5702	-6.48193	-12.6038	-6.05164	-5.77148	-10.3131	-10.2039	-5.62744
65.6	-12.5549	-6.49109	-12.5854	-6.02722	-5.75806	-10.3058	-10.1874	-5.6189
65.7	-12.5671	-6.48804	-12.5732	-6.05164	-5.75867	-10.2991	-10.199	-5.62012
65.8	-12.5824	-6.49109	-12.5946	-6.05469	-5.77271	-10.3217	-10.2008	-5.59753
65.9	-12.5549	-6.49109	-12.6038	-6.03333	-5.75317	-10.3168	-10.199	-5.61279
66	-12.5641	-6.49109	-12.5854	-6.05164	-5.76538	-10.2875	-10.1843	-5.61462
66.1	-12.5671	-6.47583	-12.561	-6.03943	-5.75439	-10.3143	-10.2014	-5.60913
66.2	-12.5824	-6.47278	-12.5854	-6.05164	-5.76477	-10.2966	-10.2039	-5.61768
66.3	-12.5641	-6.46362	-12.5854	-6.03943	-5.74829	-10.304	-10.2246	-5.58838
66.4	-12.5732	-6.50024	-12.5854	-6.03943	-5.75439	-10.2893	-10.202	-5.60913
66.5	-12.5763	-6.46667	-12.5763	-6.05469	-5.76782	-10.2869	-10.1996	-5.59937
66.6	-12.5702	-6.50024	-12.5946	-6.04553	-5.76843	-10.2942	-10.2057	-5.6073
66.7	-12.5702	-6.49414	-12.5763	-6.05774	-5.75928	-10.3033	-10.1953	-5.60364
66.8	-12.5671	-6.49719	-12.5793	-6.05164	-5.76111	-10.293	-10.1935	-5.60425
66.9	-12.5671	-6.48499	-12.5854	-6.03638	-5.75623	-10.2905	-10.1977	-5.60486
67	-12.561	-6.47888	-12.5824	-6.03638	-5.74341	-10.3009	-10.1892	-5.60974
67.1	-12.5702	-6.47278	-12.6007	-6.05774	-5.76294	-10.2789	-10.1996	-5.59814
67.2	-12.5763	-6.49414	-12.5885	-6.04858	-5.73914	-10.304	-10.2039	-5.59998
67.3	-12.5793	-6.50024	-12.5763	-6.04858	-5.75439	-10.3033	-10.1855	-5.5957
67.4	-12.558	-6.47583	-12.5915	-6.04248	-5.76416	-10.2991	-10.1904	-5.59998
67.5	-12.561	-6.47583	-12.5977	-6.04553	-5.76172	-10.2856	-10.2045	-5.59814
67.6	-12.558	-6.47278	-12.5793	-6.06079	-5.75012	-10.3064	-10.2075	-5.59692
67.7	-12.5824	-6.5033	-12.5977	-6.04248	-5.74768	-10.3003	-10.1959	-5.6012
67.8	-12.5641	-6.46973	-12.6038	-6.05774	-5.75256	-10.3192	-10.1965	-5.58594
67.9	-12.5702	-6.47888	-12.5946	-6.04858	-5.74829	-10.2838	-10.1758	-5.60852
68	-12.5641	-6.48499	-12.5915	-6.03943	-5.75317	-10.2924	-10.2026	-5.59509
68.1	-12.5793	-6.47583	-12.5946	-6.05164	-5.74646	-10.3003	-10.2252	-5.60242
68.2	-12.5671	-6.46973	-12.5915	-6.03943	-5.7489	-10.2972	-10.2094	-5.58411
68.3	-12.5854	-6.50024	-12.6129	-6.04248	-5.74524	-10.3149	-10.1904	-5.59021
68.4	-12.5793	-6.47278	-12.6007	-6.04553	-5.76416	-10.2826	-10.2033	-5.58533
68.5	-12.5824	-6.46973	-12.5824	-6.03943	-5.74951	-10.3076	-10.202	-5.59387
68.6	-12.561	-6.47278	-12.6007	-6.06079	-5.74341	-10.2966	-10.1984	-5.58594
68.7	-12.5671	-6.46973	-12.5946	-6.03333	-5.755	-10.296	-10.199	-5.57434
68.8	-12.5854	-6.49414	-12.6007	-6.02722	-5.74524	-10.2875	-10.191	-5.5957
68.9	-12.558	-6.48193	-12.5977	-6.04553	-5.74097	-10.2649	-10.1874	-5.57434
69	-12.5702	-6.45752	-12.5885	-6.04248	-5.75195	-10.2972	-10.1868	-5.58777
69.1	-12.5732	-6.48193	-12.5854	-6.05164	-5.75012	-10.3027	-10.1965	-5.58899
69.2	-12.5854	-6.48193	-12.5824	-6.03333	-5.74219	-10.2808	-10.1929	-5.58472
69.3	-12.5671	-6.46057	-12.6068	-6.05164	-5.74097	-10.2722	-10.2008	-5.59021
69.4	-12.558	-6.47278	-12.5915	-6.05774	-5.75867	-10.3021	-10.2026	-5.59387
69.5	-12.5671	-6.47278	-12.5977	-6.04248	-5.73914	-10.2948	-10.1843	-5.60425
69.6	-12.558	-6.47888	-12.5946	-6.04553	-5.74463	-10.2759	-10.202	-5.58411
69.7	-12.5763	-6.48499	-12.5915	-6.04248	-5.74524	-10.2918	-10.1977	-5.60486
69.8	-12.5641	-6.47583	-12.6038	-6.04248	-5.7489	-10.2972	-10.2057	-5.58838
69.9	-12.5702	-6.48499	-12.5885	-6.04553	-5.73853	-10.2936	-10.1965	-5.58838
70	-12.5824	-6.48499	-12.5824	-6.02722	-5.74829	-10.2802	-10.1868	-5.59753
70.1	-12.5702	-6.47583	-12.6038	-6.05164	-5.74097	-10.2899	-10.1929	-5.59387
70.2	-12.5824	-6.49414	-12.5854	-6.04553	-5.7428	-10.2722	-10.1929	-5.59631
70.3	-12.5854	-6.48193	-12.5977	-6.03638	-5.7251	-10.2942	-10.1825	-5.58167
70.4	-12.5854	-6.47583	-12.5946	-6.04858	-5.72693	-10.2802	-10.1746	-5.58899
70.5	-12.5702	-6.45752	-12.5854	-6.04248	-5.75317	-10.2863	-10.1807	-5.57373
70.6	-12.5915	-6.48499	-12.5915	-6.04248	-5.73792	-10.2802	-10.1874	-5.57861
70.7	-12.561	-6.46362	-12.5946	-6.04248	-5.72693	-10.2985	-10.1965	-5.60181
70.8	-12.5793	-6.47583	-12.5977	-6.03333	-5.74158	-10.2924	-10.1977	-5.57434
70.9	-12.6068	-6.47888	-12.5915	-6.03943	-5.74768	-10.2838	-10.202	-5.5896
71	-12.561	-6.45142	-12.6099	-6.03638	-5.73547	-10.2814	-10.1868	-5.57678
71.1	-12.6007	-6.46973	-12.5885	-6.03027	-5.73181	-10.296	-10.199	-5.59509
71.2	-12.561	-6.46667	-12.5763	-6.04248	-5.73364	-10.2863	-10.1947	-5.58655
71.3	-12.5702	-6.46057	-12.6007	-6.03943	-5.73608	-10.2948	-10.2087	-5.58167
71.4	-12.5977	-6.46362	-12.5824	-6.04248	-5.7251	-10.2887	-10.1782	-5.57922
71.5	-12.5977	-6.46667	-12.5793	-6.04553	-5.7251	-10.2936	-10.1977	-5.5896
71.6	-12.5885	-6.47278	-12.5915	-6.03333	-5.74341	-10.2863	-10.1868	-5.60364
71.7	-12.5977	-6.45142	-12.6007	-6.03638	-5.74036	-10.3009	-10.1886	-5.57251
71.8	-12.5946	-6.46362	-12.5915	-6.03638	-5.73853	-10.2802	-10.1825	-5.59265
71.9	-12.5854	-6.47278	-12.5946	-6.03638	-5.72998	-10.2936	-10.1807	-5.57678
72	-12.5915	-6.45752	-12.5854	-6.05774	-5.72937	-10.2887	-10.1916	-5.59021
72.1	-12.5946	-6.46362	-12.5915	-6.03638	-5.73364	-10.2789	-10.191	-5.578
72.2	-12.5977	-6.47583	-12.5854	-6.04858	-5.72693	-10.2863	-10.1849	-5.5835
72.3	-12.5854	-6.46057	-12.5793	-6.05469	-5.72205	-10.2747	-10.2008	-5.5835
72.4	-12.5946	-6.46667	-12.5885	-6.02722	-5.72876	-10.2863	-10.1862	-5.59082
72.5	-12.5885	-6.45752	-12.5946	-6.03943	-5.71899	-10.282	-10.2026	-5.56458
72.6	-12.6038	-6.46362	-12.5854	-6.03333	-5.72327	-10.2728	-10.1971	-5.5835
72.7	-12.5702	-6.45142	-12.5793	-6.03943	-5.73792	-10.2918	-10.1898	-5.59143
72.8	-12.6068	-6.48804	-12.5763	-6.03943	-5.72693	-10.2832	-10.1886	-5.58838
72.9	-12.5915	-6.43616	-12.5854	-6.04553	-5.72327	-10.2789	-10.1959	-5.57495
73	-12.6007	-6.46362	-12.5854	-6.03027	-5.72693	-10.282	-10.1941	-5.57739
73.1	-12.6068	-6.45447	-12.6129	-6.02722	-5.71655	-10.3082	-10.18	-5.6073
73.2	-12.6038	-6.47888	-12.5793	-6.02417	-5.72998	-10.285	-10.1862	-5.55542
73.3	-12.6068	-6.45447	-12.5854	-6.03943	-5.71594	-10.2741	-10.1764	-5.578
73.4	-12.5702	-6.46057	-12.561	-6.04248	-5.71838	-10.2887	-10.1874	-5.57739
73.5	-12.5946	-6.44836	-12.5915	-6.04248	-5.72937	-10.2808	-10.1825	-5.57861
73.6	-12.5915	-6.46667	-12.5763	-6.03943	-5.7251	-10.2832	-10.1739	-5.58044
73.7	-12.5763	-6.47278	-12.5793	-6.01807	-5.7135	-10.2838	-10.1788	-5.57129
73.8	-12.6068	-6.46362	-12.5824	-6.03027	-5.7251	-10.304	-10.1977	-5.57861
73.9	-12.5977	-6.46057	-12.5732	-6.03027	-5.72998	-10.2789	-10.191	-5.59265
74	-12.5732	-6.45447	-12.5732	-6.03638	-5.71167	-10.3009	-10.1904	-5.5658
74.1	-12.5824	-6.46057	-12.5793	-6.03943	-5.72266	-10.2771	-10.1886	-5.57434
74.2	-12.5885	-6.44531	-12.5702	-6.03638	-5.71777	-10.2863	-10.1758	-5.56152
74.3	-12.6038	-6.43921	-12.5732	-6.01196	-5.72327	-10.2747	-10.199	-5.57434
74.4	-12.5946	-6.45447	-12.5793	-6.03027	-5.7312	-10.2856	-10.1733	-5.58228
74.5	-12.5885	-6.46667	-12.5763	-6.03333	-5.70801	-10.2863	-10.1843	-5.58044
74.6	-12.5915	-6.46362	-12.5763	-6.02722	-5.71716	-10.2765	-10.1965	-5.5658
74.7	-12.6251	-6.44226	-12.5824	-6.03638	-5.71533	-10.2753	-10.1666	-5.57129
74.8	-12.5885	-6.43311	-12.5793	-6.03027	-5.71899	-10.2942	-10.188	-5.57617
74.9	-12.5915	-6.44836	-12.5885	-6.02112	-5.71045	-10.2918	-10.1904	-5.57617
75	-12.619	-6.43005	-12.5824	-6.02417	-5.7074	-10.2954	-10.1855	-5.58533
75.1	-12.5885	-6.43311	-12.5824	-6.02722	-5.71045	-10.296	-10.1813	-5.57434
75.2	-12.5946	-6.44531	-12.5763	-6.03943	-5.71289	-10.2875	-10.2008	-5.56824
75.3	-12.6038	-6.44226	-12.5824	-6.02417	-5.71655	-10.2936	-10.1849	-5.58472
75.4	-12.5793	-6.43311	-12.5702	-6.03027	-5.71228	-10.3003	-10.1874	-5.57007
75.5	-12.6099	-6.45142	-12.5519	-6.01807	-5.70068	-10.2948	-10.1892	-5.56824
75.6	-12.619	-6.44531	-12.5854	-6.01807	-5.71899	-10.2802	-10.1843	-5.57129
75.7	-12.5793	-6.44226	-12.5732	-6.01501	-5.7135	-10.293	-10.1868	-5.55786
75.8	-12.619	-6.43311	-12.5671	-6.02417	-5.72815	-10.2838	-10.1746	-5.58228
75.9	-12.5915	-6.43311	-12.5763	-6.01807	-5.72937	-10.3009	-10.1996	-5.57068
76	-12.5946	-6.43616	-12.5549	-6.00586	-5.70435	-10.3015	-10.1953	-5.56213
76.1	-12.6038	-6.43311	-12.5702	-6.02417	-5.71777	-10.3046	-10.1892	-5.58777
76.2	-12.5915	-6.41479	-12.5549	-6.02417	-5.71167	-10.2991	-10.1855	-5.57251
76.3	-12.6099	-6.43921	-12.5641	-6.01501	-5.71838	-10.2918	-10.1898	-5.5896
76.4	-12.6038	-6.42395	-12.5549	-6.00891	-5.71655	-10.2924	-10.1965	-5.5719
76.5	-12.6099	-6.4209	-12.5732	-6.02112	-5.71838	-10.2899	-10.1971	-5.56702
76.6	-12.6099	-6.44531	-12.558	-6.02417	-5.72266	-10.282	-10.1825	-5.56824
76.7	-12.6068	-6.43311	-12.5732	-6.02722	-5.69885	-10.2966	-10.1807	-5.56641
76.8	-12.6068	-6.41479	-12.561	-6.00891	-5.70984	-10.304	-10.177	-5.57861
76.9	-12.5946	-6.43005	-12.5519	-6.02417	-5.71777	-10.2991	-10.1929	-5.56519
77	-12.619	-6.43005	-12.561	-6.01501	-5.70862	-10.2948	-10.188	-5.578
77.1	-12.6068	-6.43311	-12.561	-6.03943	-5.70374	-10.2991	-10.2087	-5.58044
77.2	-12.6068	-6.39648	-12.561	-6.01196	-5.69153	-10.2924	-10.213	-5.58228
77.3	-12.6038	-6.43616	-12.5549	-6.00586	-5.71777	-10.3119	-10.1874	-5.59387
77.4	-12.5946	-6.4209	-12.558	-6.01807	-5.71167	-10.2954	-10.1947	-5.56702
77.5	-12.6007	-6.43005	-12.5458	-6.02112	-5.70129	-10.3162	-10.2033	-5.57922
77.6	-12.6068	-6.427	-12.558	-6.00281	-5.70984	-10.293	-10.1855	-5.5896
77.7	-12.6038	-6.43005	-12.561	-6.02112	-5.69214	-10.3009	-10.1703	-5.57617
77.8	-12.6068	-6.41785	-12.5488	-6.02417	-5.70618	-10.3064	-10.21	-5.56702
77.9	-12.6282	-6.427	-12.5519	-6.01196	-5.69153	-10.3101	-10.1837	-5.5719
78	-12.6129	-6.42395	-12.5519	-6.02112	-5.70496	-10.3186	-10.2039	-5.57556
78.1	-12.6251	-6.41479	-12.5549	-6.02112	-5.71106	-10.3033	-10.191	-5.55603
78.2	-12.6221	-6.39038	-12.561	-6.01501	-5.71899	-10.3125	-10.1923	-5.59082
78.3	-12.5977	-6.40869	-12.5458	-6.01501	-5.70923	-10.3052	-10.1892	-5.56335
78.4	-12.5915	-6.41479	-12.5519	-6.02417	-5.71045	-10.2985	-10.1977	-5.5719
78.5	-12.6099	-6.41785	-12.5488	-5.99976	-5.71228	-10.3052	-10.1788	-5.57312
78.6	-12.5885	-6.41479	-12.5519	-6.03027	-5.70557	-10.2905	-10.2051	-5.5658
78.7	-12.6007	-6.39648	-12.5488	-6.03333	-5.70618	-10.3143	-10.202	-5.58838
78.8	-12.6129	-6.38733	-12.5641	-6.01807	-5.71655	-10.2948	-10.2112	-5.57251
78.9	-12.6038	-6.40259	-12.5732	-6.00891	-5.71411	-10.3052	-10.1837	-5.56824
79	-12.6129	-6.40564	-12.5549	-6.02417	-5.70679	-10.3107	-10.18	-5.58472
79.1	-12.6129	-6.39954	-12.5519	-6.02112	-5.70862	-10.3168	-10.1947	-5.5603
79.2	-12.5824	-6.39343	-12.5488	-6.01501	-5.69702	-10.2997	-10.2008	-5.57007
79.3	-12.6068	-6.40869	-12.5427	-6.02722	-5.70435	-10.3223	-10.1996	-5.5481
79.4	-12.5915	-6.40869	-12.5549	-6.01501	-5.70984	-10.2838	-10.1758	-5.57312
79.5	-12.6099	-6.40869	-12.5366	-6.01807	-5.70923	-10.3241	-10.1892	-5.55542
79.6	-12.5977	-6.39648	-12.558	-6.01807	-5.69397	-10.3076	-10.1849	-5.57251
79.7	-12.6038	-6.38428	-12.5336	-6.01501	-5.69275	-10.318	-10.2039	-5.55725
79.8	-12.6312	-6.39343	-12.5549	-6.02112	-5.71655	-10.3119	-10.1959	-5.56396
79.9	-12.6007	-6.39954	-12.5397	-6.01196	-5.70435	-10.3137	-10.199	-5.54749
80	-12.6343	-6.40564	-12.5397	-6.02112	-5.71655	-10.3076	-10.1984	-5.57678
80.1	-12.6038	-6.38123	-12.5519	-5.99976	-5.69885	-10.3113	-10.1886	-5.56091
80.2	-12.6129	-6.39038	-12.5641	-6.00281	-5.69824	-10.3162	-10.1959	-5.56213
80.3	-12.6312	-6.39038	-12.5458	-6.02112	-5.70374	-10.2972	-10.2039	-5.55664
80.4	-12.6221	-6.39038	-12.5671	-6.01501	-5.69458	-10.3223	-10.1947	-5.54993
80.5	-12.5915	-6.39648	-12.5366	-6.02112	-5.7019	-10.3217	-10.1916	-5.55725
80.6	-12.6007	-6.38428	-12.5427	-6.00891	-5.70679	-10.3095	-10.1953	-5.55054
80.7	-12.616	-6.39648	-12.561	-6.03027	-5.67566	-10.3046	-10.1904	-5.54932
80.8	-12.619	-6.39954	-12.5397	-6.01501	-5.69336	-10.3119	-10.1935	-5.55664
80.9	-12.6129	-6.38123	-12.5427	-6.01501	-5.70007	-10.3064	-10.202	-5.5603
81	-12.6221	-6.39648	-12.558	-6.01196	-5.70374	-10.296	-10.1965	-5.54016
81.1	-12.5977	-6.38733	-12.5458	-6.01807	-5.68909	-10.3101	-10.2039	-5.55237
81.2	-12.619	-6.36902	-12.5549	-6.01501	-5.69153	-10.3162	-10.2063	-5.53467
81.3	-12.6251	-6.37512	-12.5519	-6.01807	-5.70007	-10.3003	-10.202	-5.55359
81.4	-12.6068	-6.39038	-12.561	-6.01807	-5.6958	-10.3076	-10.1923	-5.54626
81.5	-12.6129	-6.38123	-12.5458	-6.01807	-5.68726	-10.3247	-10.2002	-5.53894
81.6	-12.6343	-6.39648	-12.561	-6.00891	-5.69458	-10.3088	-10.1923	-5.53345
81.7	-12.6068	-6.37817	-12.5549	-6.02112	-5.69153	-10.307	-10.2045	-5.53711
81.8	-12.6038	-6.37207	-12.5458	-6.00891	-5.7019	-10.3095	-10.1916	-5.54199
81.9	-12.619	-6.39343	-12.558	-6.00891	-5.69519	-10.307	-10.1965	-5.54749
82	-12.6221	-6.39343	-12.5519	-6.01807	-5.69397	-10.307	-10.2069	-5.54565
82.1	-12.6007	-6.38428	-12.5488	-6.01501	-5.69458	-10.3162	-10.1977	-5.54932
82.2	-12.6068	-6.39343	-12.5702	-6.00891	-5.69397	-10.285	-10.1916	-5.52673
82.3	-12.616	-6.37207	-12.5641	-6.00281	-5.68787	-10.3217	-10.1874	-5.54932
82.4	-12.5885	-6.36902	-12.558	-6.01501	-5.68726	-10.3101	-10.1971	-5.54504
82.5	-12.6251	-6.38123	-12.558	-6.01501	-5.68237	-10.3021	-10.1935	-5.5426
82.6	-12.6129	-6.36292	-12.5641	-6.02112	-5.69153	-10.3168	-10.199	-5.5249
82.7	-12.619	-6.38123	-12.5549	-6.02112	-5.68787	-10.3192	-10.1996	-5.54016
82.8	-12.6038	-6.37817	-12.5427	-6.01196	-5.67932	-10.2972	-10.1892	-5.53467
82.9	-12.619	-6.37207	-12.5702	-6.00586	-5.68787	-10.3021	-10.2008	-5.55115
83	-12.6068	-6.36902	-12.5488	-6.00891	-5.68359	-10.3113	-10.1868	-5.53467
83.1	-12.6404	-6.38123	-12.5488	-5.99365	-5.68115	-10.3009	-10.1892	-5.53467
83.2	-12.616	-6.38123	-12.5488	-6.02722	-5.68481	-10.3064	-10.2069	-5.52551
83.3	-12.6129	-6.38428	-12.5671	-6.01196	-5.67993	-10.2948	-10.1855	-5.53528
83.4	-12.5854	-6.36597	-12.5549	-6.00891	-5.68115	-10.3095	-10.188	-5.52246
83.5	-12.6282	-6.39343	-12.558	-6.01196	-5.6897	-10.3033	-10.2069	-5.55237
83.6	-12.6038	-6.37512	-12.5458	-6.01196	-5.69641	-10.3058	-10.1855	-5.53589
83.7	-12.6221	-6.36902	-12.5671	-6.00586	-5.69458	-10.307	-10.1984	-5.5481
83.8	-12.5946	-6.39038	-12.5488	-6.00281	-5.6781	-10.307	-10.2057	-5.53223
83.9	-12.6282	-6.36292	-12.5458	-6.04248	-5.67749	-10.293	-10.1782	-5.52734
84	-12.619	-6.35681	-12.5458	-6.02112	-5.6958	-10.3046	-10.2002	-5.53284
84.1	-12.6038	-6.39343	-12.5427	-6.00891	-5.68909	-10.3095	-10.1892	-5.53528
84.2	-12.616	-6.35071	-12.5458	-6.01501	-5.67993	-10.2826	-10.1929	-5.52429
84.3	-12.6099	-6.39343	-12.5488	-6.00586	-5.67993	-10.3046	-10.1947	-5.53406
84.4	-12.6099	-6.36292	-12.5519	-6.02722	-5.672	-10.3027	-10.1892	-5.51636
84.5	-12.619	-6.36902	-12.5458	-6.02112	-5.67932	-10.296	-10.2155	-5.52307
84.6	-12.6129	-6.36292	-12.5397	-6.03027	-5.67383	-10.3046	-10.1837	-5.52246
84.7	-12.6038	-6.36597	-12.558	-6.02112	-5.67688	-10.3033	-10.2094	-5.53894
84.8	-12.616	-6.36902	-12.5488	-6.02112	-5.67078	-10.2905	-10.1959	-5.52734
84.9	-12.6251	-6.37207	-12.5427	-6.02417	-5.67444	-10.3095	-10.2161	-5.52856
85	-12.6038	-6.35681	-12.5488	-6.02112	-5.68359	-10.2979	-10.1843	-5.5188
85.1	-12.619	-6.36597	-12.5519	-6.02722	-5.68237	-10.3033	-10.199	-5.52185
85.2	-12.6373	-6.37512	-12.5427	-6.02417	-5.68787	-10.2875	-10.1904	-5.52185
85.3	-12.6099	-6.38428	-12.5397	-6.02722	-5.6842	-10.2991	-10.2057	-5.52002
85.4	-12.5946	-6.37512	-12.5397	-6.01196	-5.67871	-10.2863	-10.1831	-5.51025
85.5	-12.6129	-6.37512	-12.5549	-6.02417	-5.67261	-10.2893	-10.188	-5.51575
85.6	-12.6404	-6.38123	-12.5458	-6.02722	-5.66467	-10.2985	-10.2039	-5.51636
85.7	-12.6038	-6.36902	-12.5427	-6.02417	-5.672	-10.2979	-10.21	-5.52856
85.8	-12.6251	-6.37512	-12.5397	-6.01196	-5.68176	-10.3052	-10.1849	-5.52185
85.9	-12.6099	-6.36597	-12.5427	-6.03638	-5.66895	-10.2802	-10.1947	-5.52307
86	-12.616	-6.35986	-12.5458	-6.02722	-5.67749	-10.2954	-10.1837	-5.50842
86.1	-12.6129	-6.37207	-12.5397	-6.03027	-5.66956	-10.2954	-10.1929	-5.5304
86.2	-12.5946	-6.34766	-12.5397	-6.02112	-5.66711	-10.2826	-10.191	-5.5188
86.3	-12.6068	-6.38428	-12.5397	-6.02417	-5.67383	-10.2844	-10.2094	-5.51575
86.4	-12.6251	-6.38123	-12.5458	-6.04248	-5.67505	-10.2856	-10.177	-5.51819
86.5	-12.6099	-6.37512	-12.5549	-6.01807	-5.672	-10.2802	-10.1977	-5.50903
86.6	-12.6068	-6.36597	-12.5519	-6.02112	-5.672	-10.2838	-10.1782	-5.51575
86.7	-12.5915	-6.36902	-12.5336	-6.03638	-5.66772	-10.2985	-10.2039	-5.50842
86.8	-12.6099	-6.36902	-12.5397	-6.02722	-5.67505	-10.2881	-10.1935	-5.51514
86.9	-12.5915	-6.38123	-12.5305	-6.01501	-5.66223	-10.2685	-10.2081	-5.51086
87	-12.6068	-6.38123	-12.5519	-6.03333	-5.672	-10.2948	-10.1788	-5.52185
87.1	-12.6099	-6.37207	-12.5397	-6.02417	-5.67932	-10.2795	-10.1849	-5.51636
87.2	-12.6221	-6.38123	-12.558	-6.02112	-5.66284	-10.2728	-10.1813	-5.53467
87.3	-12.6129	-6.36902	-12.5336	-6.02112	-5.66223	-10.2795	-10.1904	-5.50537
87.4	-12.6099	-6.37207	-12.5549	-6.03638	-5.65857	-10.2783	-10.2051	-5.53101
87.5	-12.6099	-6.37512	-12.558	-6.01807	-5.66772	-10.2844	-10.1898	-5.53162
87.6	-12.6038	-6.37512	-12.5366	-6.01807	-5.67444	-10.2875	-10.199	-5.51208
87.7	-12.5915	-6.3446	-12.5366	-6.01196	-5.66406	-10.2722	-10.1813	-5.5072
87.8	-12.6373	-6.38733	-12.5458	-6.02722	-5.6665	-10.307	-10.1855	-5.51819
87.9	-12.6251	-6.35376	-12.558	-6.03638	-5.65491	-10.2777	-10.191	-5.51331
88	-12.6129	-6.35071	-12.5153	-6.01501	-5.66772	-10.2972	-10.1959	-5.52124
88.1	-12.6312	-6.35071	-12.5488	-6.01807	-5.672	-10.2832	-10.1837	-5.51453
88.2	-12.6038	-6.35071	-12.5397	-6.01196	-5.66162	-10.2692	-10.1941	-5.51697
88.3	-12.616	-6.36292	-12.5366	-6.03333	-5.66528	-10.2777	-10.1764	-5.5249
88.4	-12.6312	-6.35071	-12.5397	-6.02417	-5.66711	-10.2698	-10.1837	-5.51331
88.5	-12.6038	-6.35681	-12.5458	-6.02417	-5.66772	-10.2869	-10.1819	-5.50537
88.6	-12.6099	-6.34766	-12.5214	-6.02417	-5.672	-10.2747	-10.1965	-5.52307
88.7	-12.616	-6.37817	-12.5305	-6.01501	-5.65918	-10.2991	-10.1855	-5.51392
88.8	-12.6099	-6.35071	-12.5305	-6.03333	-5.65369	-10.2905	-10.1971	-5.50781
88.9	-12.616	-6.34766	-12.5366	-6.02722	-5.66467	-10.2698	-10.1947	-5.50964
89	-12.6129	-6.35071	-12.5458	-6.03638	-5.65491	-10.2747	-10.1941	-5.51086
89.1	-12.6068	-6.37207	-12.5183	-6.01501	-5.65002	-10.2869	-10.1874	-5.51086
89.2	-12.6404	-6.35376	-12.5244	-6.02417	-5.67383	-10.2716	-10.2063	-5.5072
89.3	-12.619	-6.35986	-12.5336	-6.03027	-5.66895	-10.2808	-10.1947	-5.51147
89.4	-12.616	-6.35681	-12.5397	-6.00586	-5.6665	-10.2869	-10.1904	-5.53345
89.5	-12.6312	-6.35681	-12.5336	-6.02722	-5.6604	-10.2808	-10.1984	-5.50964
89.6	-12.5915	-6.35986	-12.5092	-6.01807	-5.6604	-10.2734	-10.1752	-5.50842
89.7	-12.6221	-6.36292	-12.5244	-6.02112	-5.65979	-10.2728	-10.1868	-5.51147
89.8	-12.619	-6.3385	-12.5336	-6.00891	-5.6665	-10.2863	-10.1965	-5.52551
89.9	-12.6312	-6.3446	-12.5214	-6.01807	-5.66528	-10.3027	-10.1758	-5.51147
90	-12.6129	-6.34155	-12.5244	-6.02112	-5.64575	-10.2661	-10.1825	-5.51575
90.1	-12.6068	-6.32019	-12.5183	-6.03027	-5.66101	-10.282	-10.1843	-5.52002
90.2	-12.6221	-6.34766	-12.5122	-6.01501	-5.64514	-10.296	-10.1782	-5.5127
90.3	-12.6282	-6.35681	-12.5	-6.02112	-5.65063	-10.2887	-10.1898	-5.5127
90.4	-12.6007	-6.34766	-12.5183	-6.00891	-5.66772	-10.285	-10.1776	-5.52246
90.5	-12.6251	-6.35071	-12.5214	-6.01196	-5.65674	-10.293	-10.1862	-5.50781
90.6	-12.5915	-6.34155	-12.503	-6.02112	-5.65308	-10.2741	-10.1892	-5.50232
90.7	-12.6068	-6.3446	-12.5336	-6.01807	-5.66833	-10.3027	-10.1916	-5.5304
90.8	-12.6373	-6.35071	-12.5214	-6.02112	-5.65308	-10.2856	-10.1752	-5.50598
90.9	-12.6282	-6.33545	-12.5244	-6.01196	-5.66528	-10.2875	-10.1904	-5.51453
91	-12.6038	-6.36292	-12.5153	-6.00586	-5.64941	-10.2765	-10.1965	-5.51331
91.1	-12.6099	-6.34155	-12.5122	-6.01196	-5.65674	-10.2979	-10.1923	-5.5188
91.2	-12.616	-6.3385	-12.5214	-5.99976	-5.64392	-10.2905	-10.1794	-5.49072
91.3	-12.6129	-6.35986	-12.5183	-6.02417	-5.64697	-10.2844	-10.1996	-5.50781
91.4	-12.6282	-6.3385	-12.5214	-6.00586	-5.65308	-10.2783	-10.2081	-5.52429
91.5	-12.6251	-6.3324	-12.503	-6.01501	-5.65613	-10.2875	-10.1855	-5.51453
91.6	-12.6221	-6.3446	-12.5122	-6.00891	-5.64514	-10.2826	-10.1862	-5.49988
91.7	-12.6312	-6.34766	-12.5122	-6.00891	-5.64636	-10.3033	-10.1807	-5.50293
91.8	-12.6038	-6.32935	-12.5061	-6.00891	-5.65918	-10.282	-10.2002	-5.51453
91.9	-12.6251	-6.31714	-12.5	-6.00891	-5.63843	-10.2887	-10.1923	-5.51453
92	-12.6099	-6.3385	-12.5061	-6.00586	-5.64697	-10.2948	-10.1697	-5.51575
92.1	-12.6251	-6.3385	-12.5122	-6.01196	-5.64026	-10.3003	-10.1929	-5.50476
92.2	-12.6099	-6.3324	-12.5061	-6.00891	-5.65125	-10.2777	-10.1843	-5.51086
92.3	-12.619	-6.34766	-12.5183	-6.00586	-5.65857	-10.296	-10.1947	-5.51819
92.4	-12.616	-6.32935	-12.5092	-5.99976	-5.64453	-10.293	-10.1746	-5.49133
92.5	-12.6099	-6.32935	-12.5	-5.99365	-5.63965	-10.2881	-10.1977	-5.49866
92.6	-12.6221	-6.31714	-12.5244	-5.9906	-5.65552	-10.2643	-10.177	-5.49927
92.7	-12.6282	-6.32935	-12.503	-5.9906	-5.64636	-10.2991	-10.1855	-5.5188
92.8	-12.6221	-6.32629	-12.5122	-6.01196	-5.63354	-10.2954	-10.1923	-5.5188
92.9	-12.6129	-6.32629	-12.5153	-5.9906	-5.63049	-10.2826	-10.188	-5.50842
93	-12.6373	-6.32324	-12.5061	-6.00281	-5.64514	-10.2954	-10.2014	-5.51208
93.1	-12.6129	-6.32019	-12.5092	-5.99365	-5.6427	-10.2954	-10.1825	-5.52124
93.2	-12.6312	-6.32019	-12.5092	-5.9906	-5.65613	-10.296	-10.1831	-5.50354
93.3	-12.6221	-6.32019	-12.5122	-5.9906	-5.63538	-10.2985	-10.1721	-5.49377
93.4	-12.6282	-6.32019	-12.5092	-5.9845	-5.64392	-10.2899	-10.1758	-5.50171
93.5	-12.619	-6.30493	-12.5061	-5.9967	-5.62927	-10.2954	-10.1843	-5.50476
93.6	-12.6251	-6.31104	-12.5	-6.01196	-5.63049	-10.307	-10.1752	-5.49561
93.7	-12.619	-6.30493	-12.5183	-5.98145	-5.64087	-10.2972	-10.18	-5.50781
93.8	-12.6221	-6.29883	-12.5092	-6.00281	-5.64331	-10.2979	-10.1941	-5.50232
93.9	-12.6434	-6.32935	-12.5092	-6.00281	-5.65002	-10.3046	-10.1904	-5.51025
94	-12.6343	-6.3324	-12.5244	-5.9967	-5.64575	-10.2924	-10.1947	-5.51636
94.1	-12.6251	-6.3324	-12.5122	-6.00586	-5.63721	-10.2875	-10.188	-5.50781
94.2	-12.6343	-6.30798	-12.5	-5.9967	-5.64819	-10.3082	-10.1746	-5.49805
94.3	-12.619	-6.3324	-12.503	-5.99365	-5.6488	-10.304	-10.2051	-5.50598
94.4	-12.6068	-6.31714	-12.5122	-5.9845	-5.63354	-10.2783	-10.18	-5.5072
94.5	-12.6282	-6.30188	-12.497	-6.00586	-5.64148	-10.2924	-10.1849	-5.52063
94.6	-12.6465	-6.30188	-12.5153	-5.99365	-5.64087	-10.282	-10.1855	-5.50659
94.7	-12.6099	-6.30798	-12.5122	-5.9906	-5.6488	-10.307	-10.1862	-5.50476
94.8	-12.6221	-6.30188	-12.5	-5.99365	-5.65186	-10.2942	-10.1788	-5.49866
94.9	-12.6099	-6.31714	-12.5092	-5.98755	-5.6366	-10.3046	-10.1947	-5.50354
95	-12.6129	-6.29272	-12.5122	-5.9906	-5.6427	-10.3052	-10.1929	-5.49805
95.1	-12.6465	-6.29883	-12.5092	-6.00281	-5.62561	-10.2948	-10.1782	-5.51636
95.2	-12.6343	-6.29883	-12.4939	-5.9967	-5.64514	-10.2972	-10.1868	-5.51147
95.3	-12.6221	-6.30798	-12.5122	-5.9845	-5.65308	-10.3162	-10.1855	-5.50903
95.4	-12.619	-6.30493	-12.503	-5.99365	-5.62805	-10.3076	-10.1892	-5.49622
95.5	-12.6343	-6.29272	-12.5183	-5.98145	-5.63232	-10.3131	-10.1843	-5.50049
95.6	-12.619	-6.31104	-12.5183	-5.98755	-5.64697	-10.2997	-10.1916	-5.50476
95.7	-12.6221	-6.30188	-12.5092	-5.97839	-5.64453	-10.3021	-10.1776	-5.50964
95.8	-12.616	-6.29272	-12.5153	-5.99365	-5.65125	-10.3082	-10.1831	-5.48584
95.9	-12.616	-6.29883	-12.503	-5.9845	-5.63904	-10.3052	-10.1868	-5.50049
96	-12.6099	-6.29883	-12.5244	-5.9845	-5.62988	-10.3088	-10.1782	-5.48889
96.1	-12.6221	-6.28662	-12.5122	-6.00586	-5.64514	-10.2985	-10.1855	-5.49438
96.2	-12.616	-6.30798	-12.5244	-5.97839	-5.62561	-10.304	-10.1697	-5.49377
96.3	-12.6007	-6.28662	-12.5183	-5.99976	-5.63416	-10.3021	-10.1678	-5.51575
96.4	-12.6343	-6.29272	-12.503	-5.98755	-5.63171	-10.3046	-10.1764	-5.48706
96.5	-12.6129	-6.28662	-12.5214	-6.00281	-5.63538	-10.2985	-10.1819	-5.49988
96.6	-12.619	-6.29272	-12.5275	-5.99365	-5.63782	-10.3168	-10.1764	-5.51208
96.7	-12.6312	-6.28967	-12.5061	-5.99976	-5.6311	-10.2936	-10.1794	-5.50293
96.8	-12.6343	-6.27441	-12.5061	-5.9845	-5.64026	-10.3076	-10.1819	-5.49377
96.9	-12.6282	-6.28662	-12.5214	-5.99365	-5.625	-10.3174	-10.1709	-5.48523
97	-12.6099	-6.29272	-12.5214	-5.98145	-5.62805	-10.3137	-10.1892	-5.48889
97.1	-12.6221	-6.28052	-12.5183	-5.97839	-5.63477	-10.3113	-10.1569	-5.50049
97.2	-12.6404	-6.28052	-12.4939	-5.9906	-5.63232	-10.3082	-10.1916	-5.48584
97.3	-12.6251	-6.27441	-12.503	-5.9845	-5.63293	-10.3058	-10.1849	-5.49622
97.4	-12.616	-6.27136	-12.5092	-5.97839	-5.63232	-10.3076	-10.1642	-5.49744
97.5	-12.6282	-6.28357	-12.5183	-5.98755	-5.63904	-10.3137	-10.163	-5.48706
97.6	-12.6282	-6.28357	-12.5214	-5.99365	-5.62622	-10.2911	-10.1971	-5.47546
97.7	-12.5977	-6.28052	-12.497	-5.98145	-5.6311	-10.3235	-10.1739	-5.49316
97.8	-12.616	-6.27136	-12.5153	-6.00586	-5.64026	-10.3033	-10.1916	-5.49072
97.9	-12.619	-6.28052	-12.5	-5.99976	-5.625	-10.307	-10.1959	-5.47607
98	-12.6343	-6.28662	-12.5183	-5.97839	-5.61401	-10.3027	-10.1868	-5.50232
98.1	-12.619	-6.27747	-12.5092	-5.99976	-5.62805	-10.2875	-10.1746	-5.49377
98.2	-12.6129	-6.26831	-12.5122	-5.97839	-5.64087	-10.3095	-10.1764	-5.48035
98.3	-12.6373	-6.26221	-12.5061	-6.00281	-5.62622	-10.3155	-10.1929	-5.49561
98.4	-12.6129	-6.27136	-12.5214	-5.97839	-5.63843	-10.2777	-10.1819	-5.49683
98.5	-12.6373	-6.26831	-12.5244	-5.99365	-5.62744	-10.3095	-10.1782	-5.47852
98.6	-12.6068	-6.29578	-12.5336	-5.99365	-5.6311	-10.2979	-10.1874	-5.4895
98.7	-12.619	-6.26221	-12.5153	-5.97229	-5.62012	-10.2734	-10.1807	-5.48279
98.8	-12.6282	-6.28357	-12.5244	-6.00586	-5.6366	-10.3095	-10.1831	-5.4718
98.9	-12.6251	-6.27136	-12.5305	-5.9845	-5.6189	-10.2832	-10.1782	-5.4834
99	-12.6068	-6.27136	-12.5214	-5.97839	-5.62256	-10.318	-10.177	-5.47791
99.1	-12.6099	-6.26221	-12.5275	-5.99365	-5.61523	-10.3021	-10.1904	-5.47974
99.2	-12.6251	-6.26831	-12.5366	-5.9967	-5.62744	-10.2979	-10.1715	-5.4657
99.3	-12.6373	-6.28967	-12.5305	-5.9967	-5.62317	-10.3009	-10.1794	-5.48523
99.4	-12.6221	-6.26526	-12.5336	-5.9967	-5.62378	-10.2899	-10.1758	-5.47607
99.5	-12.6221	-6.26526	-12.5275	-5.99365	-5.63477	-10.2856	-10.1892	-5.49377
99.6	-12.6251	-6.27747	-12.5183	-5.99976	-5.62805	-10.307	-10.1776	-5.47852
99.7	-12.5977	-6.27136	-12.5366	-5.98145	-5.61035	-10.2911	-10.1862	-5.46814
99.8	-12.6251	-6.26526	-12.5122	-6.00586	-5.62561	-10.2905	-10.191	-5.47241
99.9	-12.6282	-6.26221	-12.5214	-5.9845	-5.62683	-10.3101	-10.1825	-5.48035
100	-12.619	-6.27136	-12.5305	-5.98755	-5.62256	-10.2814	-10.188	-5.4657
100.1	-12.619	-6.27747	-12.5366	-5.98755	-5.61768	-10.2942	-10.1794	-5.47729
100.2	-12.6251	-6.25916	-12.5305	-5.99365	-5.62012	-10.2972	-10.1849	-5.48218
100.3	-12.6373	-6.26221	-12.5305	-5.99365	-5.61829	-10.2808	-10.18	-5.47546
100.4	-12.6099	-6.25	-12.5275	-5.9967	-5.62866	-10.3082	-10.1837	-5.48035
100.5	-12.616	-6.25916	-12.5244	-5.99365	-5.60791	-10.2966	-10.1703	-5.46509
100.6	-12.6282	-6.24695	-12.5153	-6.00281	-5.61707	-10.2942	-10.1788	-5.47424
100.7	-12.619	-6.27747	-12.5122	-5.9967	-5.62195	-10.2985	-10.1782	-5.45532
100.8	-12.6221	-6.2561	-12.5366	-5.98755	-5.6073	-10.2881	-10.1916	-5.46631
100.9	-12.5977	-6.26221	-12.5244	-6.01196	-5.62866	-10.2899	-10.1819	-5.47424
101	-12.619	-6.28357	-12.5183	-6.00891	-5.61035	-10.2991	-10.1636	-5.47302
101.1	-12.6099	-6.25916	-12.5336	-5.99976	-5.63049	-10.2881	-10.1898	-5.46814
101.2	-12.6282	-6.25916	-12.5214	-6.00891	-5.62012	-10.3082	-10.1685	-5.46997
101.3	-12.6068	-6.2561	-12.5214	-5.99976	-5.62866	-10.2991	-10.1758	-5.4541
101.4	-12.6343	-6.2561	-12.5275	-6.00281	-5.62317	-10.2765	-10.2057	-5.45776
101.5	-12.619	-6.26526	-12.5336	-6.00586	-5.63171	-10.3003	-10.1892	-5.46326
101.6	-12.6099	-6.25	-12.5275	-5.9967	-5.62622	-10.2954	-10.1752	-5.46387
101.7	-12.6099	-6.25305	-12.5305	-6.01807	-5.61096	-10.3003	-10.191	-5.46997
101.8	-12.6343	-6.24695	-12.5092	-6.00586	-5.63354	-10.3101	-10.1825	-5.45349
101.9	-12.6221	-6.23779	-12.5305	-5.9967	-5.60974	-10.285	-10.1874	-5.47119
102	-12.619	-6.27441	-12.5183	-5.99976	-5.61523	-10.3027	-10.1868	-5.45349
102.1	-12.6007	-6.26221	-12.5305	-6.00891	-5.61523	-10.296	-10.1752	-5.45837
102.2	-12.619	-6.26526	-12.5214	-5.99976	-5.61157	-10.2985	-10.1819	-5.4541
102.3	-12.619	-6.25916	-12.5244	-5.9967	-5.60181	-10.2856	-10.1868	-5.44922
102.4	-12.6099	-6.26526	-12.5366	-6.00586	-5.62256	-10.2832	-10.1727	-5.46143
102.5	-12.616	-6.27441	-12.5183	-5.9967	-5.6073	-10.296	-10.1825	-5.45044
102.6	-12.6129	-6.23474	-12.5244	-6.00586	-5.60791	-10.2997	-10.1831	-5.448
102.7	-12.6221	-6.25305	-12.5305	-6.00891	-5.60364	-10.2869	-10.1746	-5.44739
102.8	-12.6221	-6.24695	-12.5183	-5.99365	-5.60608	-10.2777	-10.1849	-5.4303
102.9	-12.5977	-6.26221	-12.5427	-5.9967	-5.60547	-10.2826	-10.1862	-5.45898
103	-12.619	-6.24695	-12.5153	-5.9967	-5.62073	-10.2808	-10.1782	-5.45044
103.1	-12.6404	-6.25916	-12.5336	-6.00891	-5.60425	-10.2893	-10.1764	-5.44617
103.2	-12.619	-6.2561	-12.5336	-6.00586	-5.60791	-10.2814	-10.1819	-5.45532
103.3	-12.6038	-6.25305	-12.5153	-6.00281	-5.62378	-10.285	-10.166	-5.448
103.4	-12.6404	-6.25305	-12.5366	-6.00281	-5.59387	-10.2814	-10.1691	-5.46326
103.5	-12.5915	-6.24695	-12.5214	-5.9967	-5.61401	-10.2814	-10.1587	-5.45105
103.6	-12.6343	-6.25305	-12.5214	-5.98755	-5.61157	-10.2759	-10.1703	-5.45349
103.7	-12.616	-6.25305	-12.5305	-6.00891	-5.60059	-10.2759	-10.1977	-5.45105
103.8	-12.619	-6.25305	-12.5214	-6.00281	-5.60608	-10.2911	-10.1831	-5.44434
103.9	-12.6312	-6.24084	-12.5305	-5.99976	-5.61096	-10.2667	-10.1788	-5.44739
104	-12.6373	-6.25305	-12.5305	-6.01501	-5.59937	-10.2936	-10.1685	-5.45532
104.1	-12.6312	-6.2439	-12.5061	-5.99976	-5.61401	-10.2966	-10.1837	-5.45532
104.2	-12.6251	-6.25916	-12.5366	-5.9967	-5.60242	-10.2826	-10.1837	-5.44678
104.3	-12.6373	-6.22559	-12.5214	-6.00891	-5.5896	-10.2893	-10.1721	-5.43762
104.4	-12.619	-6.25	-12.5214	-5.9906	-5.60486	-10.2875	-10.1825	-5.43396
104.5	-12.6068	-6.23779	-12.5153	-5.99976	-5.60242	-10.2838	-10.1843	-5.45532
104.6	-12.6312	-6.23779	-12.5183	-6.00891	-5.61096	-10.2545	-10.1837	-5.45593
104.7	-12.619	-6.23779	-12.5183	-5.99976	-5.60364	-10.2936	-10.1758	-5.45471
104.8	-12.6099	-6.24084	-12.5275	-6.00586	-5.60364	-10.2972	-10.1916	-5.44189
104.9	-12.6312	-6.25305	-12.5244	-5.99365	-5.59387	-10.2631	-10.1837	-5.46387
105	-12.6099	-6.24695	-12.5183	-5.99365	-5.61218	-10.2899	-10.1929	-5.45349
105.1	-12.619	-6.23779	-12.5183	-6.00891	-5.59509	-10.2789	-10.1691	-5.44983
105.2	-12.6099	-6.23169	-12.5214	-5.9906	-5.61707	-10.2838	-10.1593	-5.45349
105.3	-12.6251	-6.25	-12.5061	-5.99976	-5.60486	-10.2741	-10.1953	-5.4425
105.4	-12.6282	-6.25	-12.5061	-5.9845	-5.6073	-10.2777	-10.1666	-5.46631
105.5	-12.6129	-6.24695	-12.5275	-6.00281	-5.60974	-10.2832	-10.1776	-5.46936
105.6	-12.6404	-6.26221	-12.5183	-5.9906	-5.60059	-10.2893	-10.1868	-5.44739
105.7	-12.6312	-6.25916	-12.5153	-6.00281	-5.60791	-10.2673	-10.1898	-5.43579
105.8	-12.6099	-6.2439	-12.5244	-6.00281	-5.61096	-10.2972	-10.1843	-5.44067
105.9	-12.6251	-6.22253	-12.5244	-6.01196	-5.60547	-10.2808	-10.1703	-5.45105
106	-12.6068	-6.25305	-12.5336	-5.9906	-5.59204	-10.2936	-10.1837	-5.43396
106.1	-12.6373	-6.23779	-12.5092	-6.00586	-5.62317	-10.2832	-10.1605	-5.44373
106.2	-12.6099	-6.22864	-12.5397	-5.9906	-5.58838	-10.2814	-10.1855	-5.46814
106.3	-12.6221	-6.26221	-12.5244	-5.99365	-5.61707	-10.2716	-10.1782	-5.45227
106.4	-12.6282	-6.23779	-12.5214	-5.9967	-5.59631	-10.285	-10.1733	-5.44189
106.5	-12.6068	-6.2561	-12.5183	-6.00281	-5.60059	-10.2924	-10.1813	-5.45654
106.6	-12.6312	-6.23169	-12.5183	-5.98145	-5.60852	-10.285	-10.1587	-5.4425
106.7	-12.616	-6.2561	-12.5183	-6.00586	-5.60425	-10.2863	-10.1739	-5.44373
106.8	-12.6251	-6.23474	-12.5183	-5.99365	-5.59814	-10.2893	-10.1868	-5.44739
106.9	-12.6221	-6.23169	-12.5092	-5.99365	-5.59326	-10.2673	-10.1788	-5.44189
107	-12.6404	-6.23169	-12.5092	-5.98755	-5.59143	-10.2918	-10.1831	-5.45288
107.1	-12.6312	-6.25	-12.5092	-5.98755	-5.60242	-10.2692	-10.1746	-5.44312
107.2	-12.6038	-6.21948	-12.4908	-5.99365	-5.59998	-10.3027	-10.1813	-5.43945
107.3	-12.619	-6.22864	-12.5061	-5.99365	-5.60242	-10.282	-10.1959	-5.44678
107.4	-12.6129	-6.22253	-12.5061	-5.9967	-5.58899	-10.2863	-10.1794	-5.4657
107.5	-12.6312	-6.23779	-12.497	-5.98755	-5.5957	-10.3009	-10.1929	-5.42969
107.6	-12.6343	-6.25	-12.4939	-5.99976	-5.6073	-10.2911	-10.2033	-5.45166
107.7	-12.6129	-6.2439	-12.503	-5.98145	-5.59937	-10.2899	-10.1794	-5.46509
107.8	-12.619	-6.21033	-12.497	-6.00586	-5.59448	-10.2893	-10.1825	-5.4425
107.9	-12.6343	-6.24084	-12.4847	-5.9967	-5.60852	-10.296	-10.1916	-5.44678
108	-12.6221	-6.24084	-12.5214	-6.00281	-5.6012	-10.2753	-10.1654	-5.45105
108.1	-12.6068	-6.20728	-12.4939	-5.99976	-5.6073	-10.2966	-10.1697	-5.44678
108.2	-12.6221	-6.21643	-12.5122	-5.9967	-5.60974	-10.2771	-10.1904	-5.46021
108.3	-12.6343	-6.22253	-12.5	-6.00281	-5.59631	-10.2979	-10.1623	-5.44556
108.4	-12.5977	-6.24695	-12.5122	-5.9967	-5.59143	-10.2893	-10.1886	-5.44495
108.5	-12.616	-6.23169	-12.5061	-5.97839	-5.58105	-10.2881	-10.1666	-5.45837
108.6	-12.6312	-6.20422	-12.4878	-5.99365	-5.59021	-10.2954	-10.1923	-5.45471
108.7	-12.6373	-6.20422	-12.4878	-5.9906	-5.5957	-10.2899	-10.1623	-5.45776
108.8	-12.6221	-6.21643	-12.5	-5.99976	-5.59692	-10.3003	-10.1923	-5.44617
108.9	-12.6068	-6.21338	-12.4939	-5.98145	-5.58777	-10.2905	-10.1746	-5.44006
109	-12.6251	-6.22559	-12.5092	-5.9906	-5.59082	-10.2887	-10.1813	-5.45471
109.1	-12.6251	-6.20422	-12.4817	-5.9845	-5.61829	-10.2826	-10.1862	-5.45471
109.2	-12.6434	-6.21338	-12.4908	-5.97534	-5.58044	-10.2911	-10.1752	-5.4425
109.3	-12.6099	-6.22559	-12.4847	-5.9845	-5.59021	-10.2942	-10.1581	-5.46082
109.4	-12.6343	-6.21643	-12.4878	-5.98755	-5.60547	-10.296	-10.1623	-5.45898
109.5	-12.6343	-6.20117	-12.4847	-5.9845	-5.58533	-10.2948	-10.1837	-5.45471
109.6	-12.6251	-6.20422	-12.4817	-5.98145	-5.59509	-10.3015	-10.1782	-5.45837
109.7	-12.619	-6.20117	-12.4756	-5.97229	-5.59753	-10.2863	-10.1874	-5.45166
109.8	-12.6312	-6.20117	-12.5	-5.98145	-5.58228	-10.3021	-10.155	-5.4425
109.9	-12.6099	-6.21643	-12.4908	-5.98145	-5.59509	-10.2728	-10.1502	-5.4364
110	-12.6251	-6.17371	-12.4817	-5.97534	-5.57861	-10.2826	-10.1776	-5.45593
110.1	-12.6312	-6.20422	-12.4847	-5.9906	-5.5896	-10.2905	-10.1825	-5.45654
110.2	-12.5946	-6.20117	-12.4878	-5.97229	-5.57007	-10.3003	-10.1807	-5.44678
110.3	-12.6099	-6.21033	-12.4878	-5.9845	-5.58167	-10.3113	-10.1825	-5.44128
110.4	-12.6221	-6.19812	-12.4817	-5.97839	-5.57617	-10.2887	-10.1739	-5.45654
110.5	-12.6099	-6.19812	-12.4725	-5.99365	-5.59387	-10.2985	-10.1691	-5.45837
110.6	-12.6007	-6.20728	-12.4908	-5.97839	-5.58594	-10.3003	-10.1849	-5.44495
110.7	-12.619	-6.20422	-12.4878	-5.98145	-5.58289	-10.3021	-10.166	-5.4541
110.8	-12.619	-6.19812	-12.4817	-5.97534	-5.58472	-10.3003	-10.1929	-5.44983
110.9	-12.5946	-6.20117	-12.4817	-5.98145	-5.56946	-10.2997	-10.1758	-5.45593
111	-12.6282	-6.18286	-12.4847	-5.9845	-5.58289	-10.2948	-10.1746	-5.4303
111.1	-12.6038	-6.20422	-12.4756	-5.97839	-5.58838	-10.285	-10.1739	-5.45105
111.2	-12.6221	-6.21643	-12.4664	-5.98145	-5.58167	-10.3021	-10.1849	-5.44922
111.3	-12.616	-6.19507	-12.4756	-5.97839	-5.57678	-10.2991	-10.177	-5.43945
111.4	-12.6343	-6.20117	-12.4725	-5.97839	-5.58167	-10.2997	-10.1813	-5.4425
111.5	-12.616	-6.20422	-12.4664	-5.98755	-5.58105	-10.2936	-10.1733	-5.43396
111.6	-12.616	-6.18591	-12.4817	-5.96924	-5.57007	-10.2954	-10.18	-5.44739
111.7	-12.6251	-6.20117	-12.4817	-5.96924	-5.57007	-10.3143	-10.1758	-5.44128
111.8	-12.6099	-6.17676	-12.4634	-5.97534	-5.59204	-10.3052	-10.1813	-5.448
111.9	-12.619	-6.19507	-12.4878	-5.98145	-5.57129	-10.2832	-10.1794	-5.43274
112	-12.6007	-6.17065	-12.4756	-5.96619	-5.57739	-10.3027	-10.1886	-5.44617
112.1	-12.6129	-6.19812	-12.4756	-5.97839	-5.58289	-10.3113	-10.1892	-5.43884
112.2	-12.616	-6.18591	-12.4786	-5.98145	-5.58716	-10.2991	-10.1691	-5.43518
112.3	-12.6068	-6.17676	-12.4847	-5.98145	-5.59692	-10.2893	-10.1837	-5.44312
112.4	-12.6221	-6.17371	-12.4725	-5.96924	-5.58105	-10.3088	-10.1947	-5.43823
112.5	-12.6129	-6.19202	-12.4786	-5.98145	-5.57983	-10.2869	-10.1733	-5.44373
112.6	-12.619	-6.19202	-12.4756	-5.95703	-5.57617	-10.304	-10.1813	-5.44434
112.7	-12.6129	-6.18591	-12.4847	-5.98755	-5.5719	-10.3021	-10.1788	-5.43091
112.8	-12.6068	-6.20422	-12.4756	-5.98145	-5.58228	-10.2832	-10.1782	-5.43701
112.9	-12.6129	-6.18896	-12.4756	-5.98145	-5.57129	-10.3033	-10.1691	-5.44434
113	-12.5885	-6.17981	-12.4847	-5.98145	-5.58167	-10.2924	-10.1837	-5.44617
113.1	-12.6343	-6.17981	-12.4786	-5.97229	-5.578	-10.3064	-10.1593	-5.4425
113.2	-12.5946	-6.17981	-12.4817	-5.99365	-5.56885	-10.2997	-10.1648	-5.4248
113.3	-12.6221	-6.19202	-12.4786	-5.97534	-5.56274	-10.3003	-10.1923	-5.43884
113.4	-12.619	-6.18896	-12.4695	-5.9845	-5.58105	-10.2997	-10.1746	-5.4425
113.5	-12.5885	-6.16455	-12.4847	-5.97534	-5.57129	-10.307	-10.1825	-5.448
113.6	12.5763	17.2058	5.78308	15.6525	7.70203	4.52698	4.42139	8.37402
113.7	95.6665	99.9969	73.0469	84.5825	19.9994	19.9994	19.9994	19.9994
113.8	59.3109	56.3538	44.0704	43.1183	19.9994	19.9994	19.9994	19.9994
113.9	31.9031	28.4424	24.0448	25.6867	19.9994	19.9994	19.9994	19.9994
114	21.6309	19.0125	18.988	19.6442	19.9994	19.9994	19.9994	19.9994
114.1	16.449	14.0472	15.5792	14.8254	19.9994	19.9994	19.9994	19.9994
114.2	12.915	10.5102	12.8204	11.4929	19.9994	19.9994	19.9994	19.9994
114.3	10.3882	8.06274	11.026	9.41467	17.1179	17.796	17.6703	16.452
114.4	8.6853	6.38123	9.84802	8.03833	14.1107	15.1306	14.8639	13.4241
114.5	7.48291	5.2124	9.03625	7.09229	11.8036	13.0731	12.7576	11.1542
114.6	6.65283	4.39148	8.44421	6.38428	10.047	11.449	11.1792	9.4696
114.7	6.05164	3.82996	8.00476	5.90515	8.68896	10.249	9.96643	8.1897
114.8	5.59998	3.41797	7.67822	5.52979	7.65076	9.28711	9.03015	7.2113
114.9	5.29175	3.13416	7.41882	5.26733	6.86523	8.54065	8.30261	6.47583
115	5.04456	2.88391	7.23267	5.08118	6.21826	7.9718	7.74536	5.90393
115.1	4.87671	2.75879	7.07092	4.93774	5.73914	7.52136	7.30286	5.43945
115.2	4.75159	2.64282	6.9458	4.83093	5.35339	7.15149	6.96228	5.12451
115.3	4.65698	2.55432	6.87256	4.75464	5.05371	6.88538	6.6748	4.8407
115.4	4.5929	2.49939	6.78711	4.70886	4.78943	6.64307	6.4801	4.64111
115.5	4.53491	2.45667	6.71692	4.67834	4.60815	6.46179	6.297	4.47998
115.6	4.47388	2.40479	6.68335	4.63562	4.46167	6.3092	6.15784	4.3457
115.7	4.43726	2.40173	6.63452	4.61731	4.3457	6.19629	6.04309	4.24866
115.8	4.44946	2.39258	6.57349	4.62341	4.23584	6.09131	5.95886	4.14917
115.9	4.40369	2.35596	6.55212	4.60815	4.16565	6.00403	5.87219	4.08142
116	4.38232	2.35596	6.52161	4.599	4.09363	5.92041	5.79346	4.02893
116.1	4.36707	2.33459	6.5033	4.61121	4.03198	5.87036	5.74585	3.98132
116.2	4.37012	2.33154	6.49414	4.60815	3.99231	5.81116	5.69824	3.95996
116.3	4.32434	2.32849	6.47583	4.63562	3.95874	5.76965	5.64697	3.91907
116.4	4.3396	2.32849	6.44531	4.63562	3.92822	5.71716	5.59875	3.88672
116.5	4.3396	2.31628	6.42395	4.62952	3.90137	5.66895	5.58044	3.88
116.6	4.29688	2.32849	6.41479	4.64172	3.87817	5.65796	5.54443	3.85071
116.7	4.30298	2.32239	6.39038	4.65393	3.84338	5.6012	5.50659	3.84277
116.8	4.29382	2.31323	6.36902	4.67224	3.82751	5.58777	5.48035	3.81348
116.9	4.26025	2.31018	6.37207	4.67224	3.8092	5.56152	5.45349	3.79822
117	4.27551	2.30713	6.35071	4.66919	3.79578	5.5304	5.42969	3.7915
117.1	4.26331	2.30103	6.3324	4.6814	3.78967	5.51758	5.3949	3.77502
117.2	4.245	2.32849	6.32324	4.69055	3.77991	5.51086	5.37781	3.75916
117.3	4.23584	2.29797	6.30493	4.70581	3.76648	5.4657	5.37537	3.75488
117.4	4.23279	2.30103	6.29883	4.6936	3.75366	5.45654	5.33142	3.75122
117.5	4.22363	2.31628	6.28357	4.69666	3.7439	5.43274	5.3302	3.73779
117.6	4.23584	2.32544	6.27136	4.70276	3.72375	5.41504	5.3064	3.71887
117.7	4.19922	2.29492	6.25	4.70886	3.72925	5.38086	5.27283	3.72253
117.8	4.21143	2.31018	6.25916	4.70581	3.71704	5.37292	5.27039	3.7146
117.9	4.20532	2.30408	6.22559	4.73022	3.68958	5.34302	5.23987	3.71582
118	4.17786	2.31018	6.22559	4.73022	3.703	5.35217	5.23132	3.69507
118.1	4.17175	2.30408	6.19812	4.73022	3.69629	5.3241	5.20752	3.68896
118.2	4.17175	2.29187	6.18286	4.73022	3.68469	5.31921	5.20081	3.68347
118.3	4.15955	2.29187	6.17676	4.74243	3.66882	5.30151	5.18433	3.66455
118.4	4.17786	2.31018	6.17065	4.73633	3.67676	5.271	5.16846	3.67615
118.5	4.15649	2.28577	6.1676	4.75769	3.66638	5.26855	5.17151	3.67676
118.6	4.12903	2.27661	6.14319	4.75159	3.65906	5.24841	5.15198	3.66211
118.7	4.12903	2.30408	6.13403	4.76074	3.64685	5.24353	5.13428	3.66272
118.8	4.14124	2.30103	6.11572	4.76379	3.63464	5.2356	5.13	3.6615
118.9	4.12598	2.29797	6.12183	4.76685	3.64929	5.20996	5.11475	3.64868
119	4.11987	2.30103	6.11572	4.76379	3.63281	5.20935	5.11108	3.63525
119.1	4.12292	2.29492	6.07605	4.76685	3.63892	5.19836	5.10315	3.64441
119.2	4.11987	2.27966	6.08521	4.76074	3.63403	5.18005	5.06775	3.63403
119.3	4.09546	2.29187	6.07605	4.78516	3.63464	5.16174	5.06592	3.63037
119.4	4.09851	2.28271	6.07605	4.75464	3.62488	5.16296	5.06409	3.61938
119.5	4.0802	2.27966	6.06079	4.75769	3.62488	5.14832	5.04639	3.62427
119.6	4.08936	2.29797	6.04553	4.78516	3.61206	5.13733	5.04639	3.6261
119.7	4.09241	2.30103	6.03638	4.776	3.61755	5.13916	5.02197	3.61511
119.8	4.0802	2.28577	6.02417	4.76379	3.60291	5.1178	5.01892	3.61084
119.9	4.0802	2.27661	6.02417	4.76685	3.59741	5.10986	5.00854	3.60535
120	4.0802	2.27051	6.01196	4.7699	3.59985	5.10071	5.00305	3.59436
120.1	4.06494	2.28577	6.00281	4.75769	3.5791	5.08362	5.00549	3.60168
120.2	4.02527	2.27051	6.00586	4.77905	3.58521	5.07446	4.97864	3.60413
120.3	4.05579	2.27356	5.9845	4.79736	3.58276	5.08972	4.97009	3.57788
120.4	4.04358	2.27051	5.9845	4.7821	3.5791	5.06897	4.96887	3.5968
120.5	4.03442	2.29187	5.9845	4.7699	3.58032	5.06592	4.94873	3.58887
120.6	4.02832	2.28882	5.95398	4.78516	3.57788	5.03906	4.93835	3.57422
120.7	4.02527	2.28577	5.95398	4.78821	3.58398	5.03479	4.95605	3.57422
120.8	4.02222	2.27966	5.94482	4.776	3.56873	5.04272	4.93103	3.56934
120.9	4.01917	2.28577	5.94482	4.776	3.56934	5.02869	4.93469	3.573
121	4.01306	2.30408	5.92346	4.78516	3.56201	5.02319	4.91516	3.57422
121.1	4.01611	2.27356	5.93567	4.77905	3.56628	5.0116	4.92371	3.57361
121.2	3.9978	2.27966	5.91431	4.79126	3.55103	5.01465	4.91699	3.56628
121.3	4.00391	2.28882	5.92041	4.78516	3.56018	5.0061	4.90723	3.57178
121.4	4.00391	2.29187	5.9021	4.7821	3.55408	4.9939	4.89929	3.55225
121.5	4.01306	2.2644	5.90515	4.78516	3.55286	4.99756	4.8877	3.55774
121.6	3.9917	2.28577	5.89294	4.79431	3.54919	5.00122	4.88281	3.55164
121.7	3.97644	2.27966	5.89905	4.78821	3.54492	4.98108	4.87793	3.54797
121.8	3.9856	2.26746	5.89905	4.79126	3.54492	4.96826	4.87549	3.5437
121.9	3.97339	2.29492	5.88684	4.77295	3.5376	4.96338	4.86938	3.55164
122	3.97034	2.27966	5.88074	4.79126	3.55042	4.95789	4.85901	3.54858
122.1	3.97034	2.30103	5.88074	4.78821	3.53699	4.95422	4.8584	3.54614
122.2	3.95508	2.28271	5.85022	4.7821	3.52417	4.95544	4.85107	3.53943
122.3	3.97034	2.29187	5.85327	4.79736	3.52661	4.94568	4.83765	3.53638
122.4	3.94592	2.28882	5.85632	4.7821	3.54187	4.93164	4.82971	3.53577
122.5	3.97339	2.2644	5.85632	4.79736	3.52844	4.92676	4.83154	3.54248
122.6	3.93677	2.27661	5.85632	4.78516	3.53943	4.92981	4.82361	3.54614
122.7	3.95813	2.27051	5.84412	4.77905	3.52417	4.92676	4.82727	3.53027
122.8	3.93677	2.28577	5.84412	4.80652	3.52844	4.92371	4.81262	3.53271
122.9	3.93982	2.28882	5.84412	4.77905	3.52661	4.91394	4.82117	3.51746
123	3.92456	2.28882	5.82886	4.78821	3.526	4.9176	4.80347	3.53516
123.1	3.93677	2.30103	5.8197	4.79431	3.51685	4.90723	4.81506	3.52966
123.2	3.92761	2.28271	5.8197	4.78821	3.52295	4.9054	4.7998	3.52173
123.3	3.93372	2.28577	5.8197	4.78516	3.52966	4.91272	4.79065	3.5321
123.4	3.92456	2.29797	5.81055	4.79126	3.51624	4.89624	4.7876	3.51501
123.5	3.91846	2.28271	5.81055	4.79126	3.526	4.88647	4.79553	3.52783
123.6	3.91541	2.28577	5.8075	4.79736	3.51318	4.89258	4.78027	3.52844
123.7	3.9032	2.29492	5.80139	4.78821	3.52173	4.8822	4.78577	3.53271
123.8	3.90625	2.27051	5.8075	4.78516	3.5083	4.88159	4.7876	3.52173
123.9	3.89099	2.28271	5.79224	4.80042	3.51257	4.86633	4.78027	3.50708
124	3.9093	2.30713	5.80139	4.79126	3.50159	4.87915	4.77173	3.5199
124.1	3.89709	2.28271	5.79224	4.80042	3.50647	4.87183	4.76196	3.51807
124.2	3.89099	2.27661	5.78308	4.80347	3.51807	4.86694	4.77051	3.5199
124.3	3.88794	2.29187	5.78613	4.77905	3.51746	4.85046	4.76379	3.51074
124.4	3.87878	2.29187	5.79224	4.79126	3.50098	4.86755	4.76501	3.50342
124.5	3.89099	2.27661	5.76172	4.78516	3.5144	4.86267	4.75769	3.51318
124.6	3.88794	2.29492	5.77698	4.80042	3.51074	4.85107	4.75159	3.51257
124.7	3.88794	2.31323	5.77698	4.81873	3.50342	4.84985	4.74487	3.5022
124.8	3.86658	2.27966	5.75562	4.776	3.48938	4.84619	4.73938	3.49976
124.9	3.88184	2.29492	5.74951	4.80652	3.50891	4.84619	4.73938	3.49854
125	3.85437	2.31934	5.75867	4.79126	3.51074	4.85352	4.74365	3.50525
125.1	3.87878	2.27966	5.75256	4.80042	3.49731	4.83093	4.74976	3.49915
125.2	3.87878	2.28882	5.76172	4.79736	3.5144	4.83582	4.74609	3.50525
125.3	3.86963	2.29492	5.75867	4.80347	3.50159	4.82117	4.72351	3.51563
125.4	3.86658	2.31018	5.75256	4.79126	3.50281	4.83337	4.7406	3.49487
125.5	3.85742	2.29187	5.74951	4.79736	3.50769	4.82239	4.72351	3.50342
125.6	3.86353	2.27966	5.74036	4.79736	3.49792	4.83093	4.73328	3.50159
125.7	3.85437	2.27966	5.73425	4.78821	3.50525	4.81628	4.72961	3.49304
125.8	3.87573	2.29187	5.7312	4.81873	3.49548	4.823	4.71252	3.48572
125.9	3.83606	2.30713	5.7373	4.82178	3.51257	4.82361	4.71619	3.48999
126	3.84521	2.27051	5.7251	4.80652	3.49609	4.82605	4.72168	3.50281
126.1	3.84827	2.29187	5.73425	4.81873	3.49426	4.80042	4.71863	3.51379
126.2	3.84827	2.30408	5.7251	4.80042	3.49731	4.81628	4.70398	3.5022
126.3	3.82996	2.28577	5.7251	4.81567	3.50525	4.82361	4.72229	3.49609
126.4	3.8208	2.30713	5.72205	4.80957	3.4906	4.81445	4.70825	3.48267
126.5	3.82996	2.29187	5.71289	4.81567	3.49426	4.79675	4.70825	3.49609
126.6	3.83606	2.32239	5.71594	4.82483	3.49976	4.81323	4.71008	3.5022
126.7	3.8269	2.30713	5.71594	4.80957	3.49365	4.8053	4.70337	3.48328
126.8	3.8208	2.29797	5.71289	4.82178	3.50769	4.7937	4.69238	3.4967
126.9	3.81775	2.30103	5.72815	4.80957	3.49121	4.80042	4.70032	3.49243
127	3.8208	2.30408	5.69458	4.81567	3.48755	4.80164	4.68201	3.49426
127.1	3.82385	2.29492	5.70068	4.79736	3.49609	4.7998	4.68872	3.48999
127.2	3.79028	2.31323	5.70068	4.82178	3.50525	4.78821	4.69299	3.48328
127.3	3.8208	2.30103	5.69763	4.80042	3.50037	4.77783	4.68079	3.49487
127.4	3.83301	2.31628	5.69763	4.82178	3.48816	4.77722	4.6759	3.48877
127.5	3.79333	2.29797	5.69153	4.82483	3.48938	4.78516	4.68994	3.48755
127.6	3.81165	2.29492	5.70068	4.82788	3.49792	4.79126	4.67957	3.49487
127.7	3.80554	2.31018	5.70068	4.81873	3.48999	4.77356	4.67407	3.48083
127.8	3.80859	2.31628	5.70068	4.81567	3.49609	4.76563	4.68506	3.48145
127.9	3.79333	2.30103	5.69763	4.80652	3.4845	4.78577	4.68079	3.48938
128	3.79028	2.31934	5.68542	4.82483	3.49426	4.77783	4.67224	3.49304
128.1	3.79028	2.31323	5.67627	4.82178	3.4967	4.76868	4.6698	3.48694
128.2	3.77502	2.31323	5.69458	4.82483	3.49792	4.79309	4.67468	3.48999
128.3	3.79333	2.32849	5.68237	4.81262	3.4967	4.76685	4.65515	3.49487
128.4	3.78723	2.31628	5.68542	4.81567	3.49792	4.77844	4.6637	3.48267
128.5	3.79333	2.31628	5.67627	4.81873	3.49182	4.76257	4.66187	3.48145
128.6	3.78723	2.31628	5.68237	4.83398	3.50098	4.77844	4.66309	3.49731
128.7	3.78113	2.32239	5.67322	4.83093	3.48511	4.77478	4.66858	3.47351
128.8	3.79333	2.30103	5.67017	4.81873	3.48633	4.76807	4.66187	3.49976
128.9	3.77502	2.33154	5.66711	4.81567	3.50403	4.76379	4.66553	3.48267
129	3.79028	2.31628	5.67932	4.82788	3.49365	4.76501	4.66248	3.49121
129.1	3.79944	2.31934	5.66406	4.82178	3.48145	4.75952	4.67041	3.48755
129.2	3.77197	2.32239	5.66711	4.84009	3.48999	4.76074	4.65942	3.48938
129.3	3.78418	2.32849	5.66406	4.83398	3.48999	4.76624	4.66309	3.49731
129.4	3.78723	2.30713	5.66406	4.82178	3.4967	4.7583	4.65332	3.49609
129.5	3.77808	2.31934	5.66101	4.83093	3.5022	4.75159	4.65393	3.47717
129.6	3.76282	2.32239	5.66101	4.80957	3.47839	4.74304	4.65515	3.50098
129.7	3.77808	2.32239	5.63965	4.82788	3.50342	4.7583	4.65942	3.48511
129.8	3.75977	2.33154	5.65491	4.82178	3.49487	4.75952	4.65149	3.5022
129.9	3.77502	2.32239	5.65491	4.82178	3.48694	4.74609	4.64539	3.48206
130	3.75671	2.31628	5.65186	4.83704	3.49792	4.7467	4.63989	3.49731
130.1	3.74756	2.33154	5.65491	4.83398	3.50159	4.74426	4.64355	3.49182
130.2	3.75977	2.33154	5.65186	4.83704	3.49487	4.7406	4.63745	3.48694
130.3	3.74756	2.31934	5.65491	4.83704	3.48694	4.73938	4.65332	3.48755
130.4	3.76282	2.32239	5.64575	4.82178	3.4906	4.74182	4.64905	3.479
130.5	3.74756	2.31934	5.64575	4.82178	3.50342	4.74609	4.64722	3.50281
130.6	3.72925	2.33765	5.65186	4.84009	3.49304	4.74304	4.63989	3.48633
130.7	3.75671	2.31628	5.62744	4.83093	3.48816	4.73999	4.64355	3.49548
130.8	3.75061	2.33765	5.65186	4.80957	3.50708	4.7406	4.64111	3.49731
130.9	3.71704	2.32849	5.6427	4.82483	3.49976	4.72595	4.64355	3.50281
131	3.75061	2.31934	5.63354	4.82178	3.49182	4.7467	4.63318	3.49731
131.1	3.76282	2.32544	5.6427	4.82483	3.49792	4.73511	4.64172	3.4906
131.2	3.72925	2.34375	5.6366	4.82483	3.49426	4.73999	4.62769	3.50464
131.3	3.73535	2.33154	5.62134	4.81873	3.50098	4.74731	4.63318	3.4967
131.4	3.74451	2.33459	5.6366	4.82788	3.51807	4.73145	4.63867	3.49365
131.5	3.73535	2.33459	5.6427	4.84314	3.49182	4.75403	4.63623	3.49487
131.6	3.7262	2.32544	5.63354	4.82483	3.48572	4.73389	4.62769	3.48389
131.7	3.7262	2.34375	5.62744	4.82483	3.49792	4.73572	4.62585	3.49976
131.8	3.7384	2.32239	5.62439	4.83398	3.49304	4.73267	4.62341	3.50342
131.9	3.7262	2.32239	5.61829	4.82788	3.49854	4.74792	4.63806	3.50098
132	3.74146	2.35596	5.61218	4.82788	3.48694	4.73022	4.62097	3.49609
132.1	3.7323	2.36206	5.62134	4.82483	3.49976	4.74304	4.62769	3.50647
132.2	3.70483	2.31018	5.61829	4.83093	3.50037	4.73816	4.61853	3.50891
132.3	3.73535	2.34985	5.60913	4.82178	3.49915	4.73633	4.62952	3.49792
132.4	3.7323	2.3468	5.62744	4.81873	3.49182	4.72717	4.6228	3.50159
132.5	3.70789	2.32849	5.60608	4.83704	3.49304	4.71985	4.62769	3.50159
132.6	3.7323	2.35901	5.61218	4.81873	3.51074	4.73389	4.63745	3.49976
132.7	3.70483	2.33765	5.61523	4.84009	3.49976	4.73267	4.63074	3.5083
132.8	3.69568	2.33765	5.60608	4.83093	3.49243	4.729	4.63562	3.4967
132.9	3.72314	2.34985	5.61829	4.81567	3.49731	4.73083	4.61365	3.51685
133	3.71399	2.3407	5.62134	4.83704	3.49915	4.73511	4.62524	3.51257
133.1	3.71094	2.33459	5.60913	4.82788	3.48938	4.74243	4.62646	3.51685
133.2	3.71094	2.34985	5.60608	4.83398	3.50342	4.729	4.63806	3.51929
133.3	3.70178	2.33154	5.60608	4.82483	3.49304	4.73145	4.62158	3.50708
133.4	3.69873	2.32849	5.60608	4.81873	3.5022	4.73755	4.63318	3.51196
133.5	3.70178	2.36206	5.60913	4.82178	3.51257	4.72229	4.62097	3.526
133.6	3.71094	2.3468	5.61218	4.83398	3.50281	4.73511	4.61853	3.50159
133.7	3.69263	2.34985	5.59998	4.82178	3.49304	4.73511	4.62708	3.50586
133.8	3.70789	2.3407	5.60303	4.82788	3.49609	4.73206	4.6228	3.51868
133.9	3.70178	2.35291	5.60913	4.81873	3.5083	4.72412	4.62036	3.51807
134	3.67737	2.3468	5.60608	4.83398	3.49426	4.71863	4.62341	3.50891
134.1	3.69263	2.35291	5.59998	4.82178	3.4967	4.73572	4.62158	3.50891
134.2	3.70789	2.34375	5.59387	4.83398	3.50037	4.72595	4.6167	3.51074
134.3	3.68958	2.35596	5.59692	4.82483	3.50403	4.73022	4.62219	3.51929
134.4	3.68652	2.3468	5.60608	4.81262	3.50159	4.73145	4.61975	3.5083
134.5	3.69568	2.36511	5.59998	4.82788	3.50891	4.72717	4.62585	3.51685
134.6	3.68347	2.3468	5.59692	4.81262	3.50037	4.72534	4.61182	3.52173
134.7	3.66211	2.36206	5.58777	4.82483	3.50647	4.73633	4.61365	3.50159
134.8	3.68652	2.34375	5.60608	4.84619	3.4906	4.73816	4.61426	3.51501
134.9	3.69873	2.35291	5.58472	4.81262	3.50525	4.72961	4.62646	3.51868
135	3.68347	2.34375	5.60303	4.83093	3.50464	4.74609	4.61304	3.5199
135.1	3.68042	2.3407	5.60303	4.82788	3.49976	4.72107	4.62524	3.51624
135.2	3.68042	2.35596	5.57251	4.82483	3.50525	4.73083	4.62402	3.52356
135.3	3.68958	2.36511	5.56946	4.83093	3.49854	4.72717	4.63257	3.52722
135.4	3.67737	2.35291	5.59692	4.83093	3.49243	4.7168	4.60632	3.51929
135.5	3.67737	2.35291	5.60608	4.83398	3.49792	4.73755	4.62158	3.52173
135.6	3.68958	2.36511	5.61218	4.82483	3.50037	4.73022	4.63318	3.52295
135.7	3.67126	2.35291	5.59082	4.83398	3.50403	4.72656	4.63074	3.51196
135.8	3.67432	2.36511	5.60303	4.85229	3.50342	4.72961	4.63379	3.51196
135.9	3.68652	2.37427	5.59082	4.83093	3.50098	4.73572	4.63379	3.52722
136	3.67432	2.34985	5.59387	4.83398	3.51257	4.73999	4.62891	3.52966
136.1	3.67126	2.34985	5.59082	4.84009	3.49976	4.7345	4.62341	3.52478
136.2	3.68652	2.36816	5.60608	4.82178	3.5199	4.73511	4.60999	3.52539
136.3	3.67126	2.35901	5.60608	4.83704	3.49854	4.73572	4.61426	3.51563
136.4	3.66821	2.36816	5.58472	4.84009	3.5083	4.72717	4.62158	3.52051
136.5	3.66211	2.35291	5.59692	4.82483	3.49487	4.73633	4.62463	3.51868
136.6	3.6499	2.37427	5.58777	4.84924	3.50586	4.73328	4.61548	3.52234
136.7	3.67432	2.35596	5.58472	4.83704	3.5083	4.7345	4.6283	3.52478
136.8	3.66821	2.35291	5.59387	4.82483	3.50708	4.72656	4.62646	3.52173
136.9	3.67126	2.36206	5.60608	4.81567	3.51257	4.73145	4.61304	3.52356
137	3.66821	2.3468	5.59387	4.82483	3.52051	4.729	4.63013	3.52539
137.1	3.65601	2.35291	5.58472	4.84009	3.49609	4.72534	4.61548	3.51929
137.2	3.65295	2.33459	5.60303	4.82483	3.50403	4.72717	4.62585	3.52661
137.3	3.66516	2.34985	5.59387	4.83704	3.50647	4.74365	4.62463	3.51807
137.4	3.63159	2.35291	5.59692	4.82483	3.49854	4.73694	4.61182	3.52356
137.5	3.66516	2.36206	5.58472	4.83398	3.5144	4.72595	4.60938	3.52295
137.6	3.65906	2.35596	5.58472	4.83704	3.50708	4.72534	4.61975	3.52417
137.7	3.62244	2.35291	5.59387	4.84009	3.51563	4.73206	4.62036	3.52905
137.8	3.67737	2.35901	5.58167	4.83093	3.51624	4.73145	4.62524	3.52539
137.9	3.66211	2.37732	5.58472	4.84924	3.49915	4.7229	4.62158	3.53943
138	3.6499	2.35901	5.59998	4.84314	3.50403	4.73755	4.60876	3.51807
138.1	3.65601	2.37122	5.58777	4.83398	3.50952	4.72412	4.60876	3.52539
138.2	3.62854	2.36816	5.58777	4.84619	3.50952	4.74182	4.62524	3.51746
138.3	3.6377	2.35901	5.59387	4.84924	3.51563	4.73267	4.6228	3.51746
138.4	3.63159	2.35901	5.59082	4.84619	3.50952	4.73206	4.60999	3.52051
138.5	3.64075	2.37122	5.59692	4.84619	3.5022	4.73755	4.62463	3.53333
138.6	3.64685	2.36206	5.58167	4.85229	3.51746	4.71863	4.62097	3.526
138.7	3.6499	2.36816	5.58777	4.82788	3.50586	4.74548	4.61609	3.52661
138.8	3.66211	2.38037	5.57861	4.8645	3.52356	4.73328	4.60754	3.52112
138.9	3.61328	2.35596	5.58167	4.84619	3.50464	4.73755	4.60632	3.53149
139	3.63159	2.35291	5.60303	4.84924	3.5083	4.72656	4.61975	3.53333
139.1	3.6438	2.36816	5.58472	4.84314	3.5083	4.72107	4.62219	3.54431
139.2	3.64685	2.37122	5.59387	4.84619	3.50952	4.71802	4.61609	3.52539
139.3	3.62854	2.37122	5.58777	4.84314	3.51318	4.73206	4.61426	3.52966
139.4	3.63159	2.37732	5.58472	4.84924	3.50952	4.72107	4.62463	3.5144
139.5	3.64685	2.36511	5.59387	4.84619	3.51135	4.72412	4.61731	3.53516
139.6	3.62549	2.36206	5.60303	4.84924	3.51501	4.73267	4.61243	3.52478
139.7	3.6377	2.39258	5.59082	4.84314	3.50403	4.71558	4.61975	3.52051
139.8	3.62854	2.37122	5.58777	4.84924	3.5144	4.71985	4.60815	3.53088
139.9	3.63159	2.36511	5.60303	4.8584	3.51318	4.71802	4.62769	3.50769
140	3.61633	2.37427	5.59387	4.86145	3.5083	4.72046	4.61548	3.5321
140.1	3.63464	2.36511	5.60608	4.83704	3.52661	4.72961	4.61304	3.53455
140.2	3.61938	2.37732	5.62134	4.8584	3.5199	4.72534	4.6167	3.52844
140.3	3.6499	2.38953	5.60303	4.85535	3.52173	4.7345	4.61731	3.53149
140.4	3.62549	2.36511	5.60913	4.85535	3.51624	4.73206	4.61182	3.52905
140.5	3.64075	2.37732	5.60608	4.86755	3.51624	4.70642	4.61609	3.52417
140.6	3.62549	2.37732	5.59998	4.84924	3.51135	4.73877	4.60693	3.52661
140.7	3.61633	2.38037	5.61829	4.85229	3.51501	4.71619	4.6106	3.53943
140.8	3.61328	2.37427	5.59692	4.8584	3.52234	4.71497	4.61548	3.52234
140.9	3.62244	2.38953	5.59998	4.84619	3.51685	4.72168	4.60999	3.53821
141	3.62854	2.37427	5.61523	4.8645	3.53271	4.72595	4.61243	3.53027
141.1	3.61023	2.38037	5.61218	4.87366	3.50159	4.72229	4.60938	3.52173
141.2	3.62244	2.39258	5.59998	4.84314	3.50586	4.72107	4.60693	3.52112
141.3	3.63159	2.37122	5.59998	4.87061	3.51196	4.71497	4.60205	3.53455
141.4	3.61023	2.37732	5.61523	4.86755	3.51563	4.72168	4.60815	3.54248
141.5	3.60718	2.38037	5.59998	4.8584	3.51807	4.72046	4.60632	3.526
141.6	3.60107	2.38037	5.59082	4.8584	3.51929	4.73877	4.60571	3.53149
141.7	3.61938	2.38342	5.59692	4.8645	3.51257	4.72168	4.61182	3.50647
141.8	3.61938	2.38342	5.59998	4.84619	3.51013	4.70642	4.60754	3.53394
141.9	3.61633	2.38037	5.59692	4.86145	3.51929	4.72351	4.60266	3.52661
142	3.61328	2.37732	5.61218	4.86755	3.52539	4.70642	4.61304	3.53333
142.1	3.61633	2.41394	5.59387	4.8584	3.52539	4.72412	4.60144	3.526
142.2	3.60413	2.37122	5.59998	4.86755	3.53027	4.71313	4.61121	3.53027
142.3	3.6377	2.39563	5.59692	4.87671	3.51196	4.71619	4.60693	3.5199
142.4	3.61328	2.37122	5.60608	4.88586	3.51257	4.70337	4.60876	3.52905
142.5	3.61633	2.39563	5.60608	4.87366	3.52356	4.70947	4.60632	3.52539
142.6	3.60413	2.39258	5.59692	4.88586	3.50525	4.72168	4.60022	3.51929
142.7	3.57971	2.40173	5.60303	4.88281	3.51563	4.71436	4.60266	3.526
142.8	3.60413	2.39258	5.61218	4.87671	3.52112	4.71191	4.61121	3.52173
142.9	3.60718	2.38647	5.60303	4.8645	3.51624	4.70703	4.60632	3.51868
143	3.62549	2.37122	5.61218	4.88281	3.53027	4.70764	4.60449	3.52539
143.1	3.61328	2.38953	5.60608	4.89197	3.52722	4.7113	4.60388	3.53271
143.2	3.57666	2.38953	5.60913	4.89502	3.53027	4.70825	4.60022	3.53333
143.3	3.60107	2.39868	5.60913	4.87976	3.51074	4.69788	4.59473	3.52539
143.4	3.60413	2.40173	5.60303	4.88586	3.53027	4.71191	4.61792	3.52844
143.5	3.60413	2.39868	5.59998	4.87976	3.51501	4.72168	4.60083	3.53821
143.6	3.60413	2.40784	5.60303	4.87976	3.53149	4.69055	4.599	3.52356
143.7	3.61023	2.39868	5.60913	4.87671	3.53088	4.71924	4.60266	3.52783
143.8	3.60413	2.41089	5.60303	4.88281	3.51318	4.7052	4.59167	3.53088
143.9	3.60107	2.40173	5.60303	4.88892	3.52905	4.70703	4.59473	3.52539
144	3.60107	2.39563	5.61218	4.88586	3.52905	4.69116	4.59106	3.53699
144.1	3.58887	2.41394	5.60303	4.88892	3.52112	4.70154	4.59106	3.53455
144.2	3.60107	2.37732	5.59998	4.87366	3.52417	4.70642	4.59595	3.52783
144.3	3.60718	2.39868	5.61218	4.88281	3.52966	4.7113	4.60815	3.51929
144.4	3.60107	2.42004	5.61829	4.88586	3.53088	4.69543	4.60022	3.52478
144.5	3.60413	2.39868	5.60303	4.87366	3.53394	4.68994	4.59412	3.53394
144.6	3.58276	2.41089	5.59387	4.87976	3.5199	4.7113	4.60876	3.54431
144.7	3.60413	2.39258	5.61523	4.89807	3.53394	4.70947	4.60632	3.54065
144.8	3.58887	2.41699	5.61218	4.88892	3.52356	4.70642	4.58923	3.52844
144.9	3.61023	2.39868	5.61218	4.90112	3.52417	4.71069	4.59656	3.52722
145	3.59497	2.42615	5.61523	4.87366	3.53333	4.6936	4.59229	3.53271
145.1	3.57666	2.44141	5.61218	4.87976	3.526	4.69727	4.59229	3.53027
145.2	3.60413	2.41089	5.59692	4.90112	3.53088	4.71069	4.60632	3.53027
145.3	3.61023	2.39868	5.59387	4.89197	3.52783	4.71191	4.61182	3.54126
145.4	3.58276	2.41394	5.60303	4.87976	3.53516	4.69116	4.59045	3.53333
145.5	3.60718	2.4292	5.60913	4.90112	3.52417	4.69788	4.58496	3.53516
145.6	3.59192	2.41089	5.60303	4.89807	3.51807	4.6875	4.59045	3.54492
145.7	3.5675	2.40784	5.60303	4.87976	3.52295	4.70947	4.58618	3.52234
145.8	3.57056	2.43835	5.60913	4.87671	3.53333	4.70459	4.59106	3.53638
145.9	3.59192	2.4292	5.60913	4.90417	3.53333	4.69299	4.599	3.54431
146	3.61938	2.41394	5.58777	4.87976	3.52417	4.7052	4.58923	3.5321
146.1	3.60413	2.4353	5.59387	4.87976	3.53149	4.69788	4.5874	3.54675
146.2	3.57971	2.4231	5.59998	4.88586	3.53943	4.68445	4.58496	3.53455
146.3	3.59497	2.41394	5.60303	4.90417	3.5321	4.69238	4.59961	3.5376
146.4	3.58887	2.42615	5.59692	4.89807	3.5321	4.69543	4.59229	3.54065
146.5	3.58887	2.40784	5.59692	4.89197	3.526	4.67896	4.58435	3.54004
146.6	3.58887	2.42615	5.60608	4.88586	3.53516	4.69543	4.58801	3.54187
146.7	3.59192	2.4353	5.61829	4.89807	3.5437	4.70337	4.59229	3.5376
146.8	3.58276	2.4231	5.60608	4.89197	3.54004	4.69666	4.57581	3.54187
146.9	3.57971	2.42615	5.59692	4.89197	3.53577	4.68262	4.59106	3.53821
147	3.57971	2.4292	5.60303	4.88586	3.53149	4.69177	4.59167	3.54187
147.1	3.59192	2.43225	5.59387	4.89502	3.52478	4.68262	4.58984	3.52905
147.2	3.57056	2.41394	5.58777	4.89502	3.5321	4.69788	4.58679	3.53516
147.3	3.57971	2.44141	5.59082	4.89197	3.53027	4.6936	4.5813	3.54004
147.4	3.57666	2.44446	5.59998	4.89197	3.5321	4.68994	4.59595	3.54004
147.5	3.58887	2.44446	5.60303	4.89807	3.54126	4.68689	4.59106	3.54858
147.6	3.57056	2.41699	5.59998	4.89807	3.53516	4.69482	4.58618	3.54492
147.7	3.58887	2.44141	5.59082	4.88892	3.54065	4.69666	4.59229	3.54126
147.8	3.57361	2.4353	5.58777	4.90112	3.54919	4.70337	4.59534	3.5437
147.9	3.60718	2.43835	5.61218	4.89502	3.53638	4.6814	4.58313	3.56018
148	3.57361	2.44141	5.58472	4.90417	3.5321	4.69177	4.57397	3.54492
148.1	3.55835	2.43225	5.59998	4.89807	3.54004	4.68872	4.59534	3.55103
148.2	3.57361	2.4353	5.60913	4.88281	3.54187	4.69543	4.58557	3.55164
148.3	3.57056	2.42615	5.60608	4.90417	3.53271	4.69116	4.58923	3.55286
148.4	3.58582	2.44446	5.58167	4.88281	3.53943	4.68933	4.59106	3.5498
148.5	3.56445	2.4292	5.59082	4.87366	3.54126	4.69482	4.58496	3.55347
148.6	3.57361	2.44446	5.59387	4.91638	3.54919	4.6875	4.57642	3.54614
148.7	3.57361	2.4353	5.60303	4.87366	3.52844	4.69116	4.59229	3.55652
148.8	3.5675	2.43225	5.57556	4.90417	3.54248	4.68933	4.56909	3.5498
148.9	3.5614	2.42004	5.59692	4.88586	3.55164	4.68872	4.58801	3.5553
149	3.57361	2.43835	5.58472	4.89807	3.54553	4.69116	4.58252	3.55591
149.1	3.58276	2.4292	5.58777	4.91638	3.53882	4.68872	4.59045	3.54736
149.2	3.58887	2.44446	5.59998	4.88892	3.53821	4.70337	4.58679	3.56689
149.3	3.55835	2.4353	5.58472	4.89807	3.54004	4.69788	4.5929	3.55713
149.4	3.57666	2.43835	5.59692	4.89807	3.5437	4.70032	4.58252	3.55103
149.5	3.5614	2.45361	5.59692	4.88586	3.54126	4.69482	4.58801	3.56262
149.6	3.57056	2.4353	5.58777	4.89807	3.54065	4.69055	4.59534	3.56262
149.7	3.57056	2.42615	5.59082	4.89807	3.5437	4.70337	4.57947	3.55408
149.8	3.5675	2.45056	5.58472	4.89197	3.55042	4.70093	4.59045	3.56628
149.9	3.55225	2.42004	5.58472	4.89197	3.55164	4.6936	4.57581	3.56201
150	3.55835	2.4292	5.59387	4.91028	3.54675	4.69971	4.57886	3.55042
150.1	3.5614	2.44446	5.59387	4.88892	3.53882	4.70642	4.59045	3.55835
150.2	3.57666	2.45056	5.59692	4.87671	3.54553	4.69788	4.5874	3.56018
150.3	3.55835	2.45361	5.58472	4.90112	3.55103	4.6936	4.5636	3.56812
150.4	3.58582	2.44751	5.59082	4.89807	3.54614	4.69666	4.58435	3.56445
150.5	3.5614	2.42615	5.58777	4.91333	3.54126	4.68262	4.58557	3.56689
150.6	3.5675	2.43835	5.59387	4.89807	3.5437	4.71313	4.58313	3.56445
150.7	3.57971	2.4292	5.59082	4.88281	3.54614	4.69727	4.59412	3.55774
150.8	3.5675	2.45056	5.58777	4.87976	3.54675	4.70032	4.58679	3.55469
150.9	3.56445	2.44751	5.59082	4.88281	3.55164	4.69177	4.58496	3.56873
151	3.54614	2.44446	5.59082	4.89502	3.55225	4.6991	4.57214	3.57544
151.1	3.54919	2.44446	5.57861	4.87976	3.55469	4.68994	4.58801	3.56506
151.2	3.55835	2.45056	5.58777	4.88281	3.55774	4.69727	4.59412	3.56567
151.3	3.57971	2.44751	5.57861	4.89807	3.54004	4.69849	4.57275	3.57666
151.4	3.5553	2.43225	5.58777	4.87366	3.5437	4.69116	4.59167	3.56567
151.5	3.57361	2.45361	5.58777	4.89807	3.53149	4.69543	4.58374	3.56079
151.6	3.55225	2.44751	5.58167	4.89502	3.55103	4.6991	4.58862	3.5675
151.7	3.55225	2.45056	5.58472	4.87976	3.55347	4.69055	4.58435	3.57849
151.8	3.56445	2.44751	5.57556	4.91638	3.55591	4.70215	4.58801	3.56018
151.9	3.57361	2.44446	5.58472	4.88892	3.54858	4.70215	4.58191	3.57544
152	3.56445	2.46887	5.57861	4.89197	3.54675	4.70764	4.58923	3.58826
152.1	3.58276	2.4231	5.59082	4.88892	3.55408	4.69604	4.5874	3.58032
152.2	3.5553	2.45361	5.59387	4.89502	3.56018	4.7052	4.58313	3.5675
152.3	3.54004	2.45056	5.59692	4.89502	3.5498	4.70337	4.60327	3.55652
152.4	3.57971	2.44751	5.59082	4.91028	3.55469	4.69788	4.58069	3.57239
152.5	3.55225	2.44446	5.58472	4.88281	3.55408	4.7113	4.58252	3.5791
152.6	3.54614	2.44141	5.58472	4.88586	3.5498	4.71008	4.60327	3.56628
152.7	3.57666	2.45972	5.59387	4.90112	3.56323	4.70154	4.59351	3.57422
152.8	3.53394	2.44446	5.59082	4.87671	3.54858	4.70886	4.58557	3.57849
152.9	3.5675	2.47192	5.58167	4.91333	3.55164	4.7052	4.58923	3.57117
153	3.5614	2.43225	5.58777	4.90417	3.55896	4.70398	4.59534	3.57727
153.1	3.54309	2.44446	5.59082	4.88281	3.55408	4.70825	4.58069	3.56628
153.2	3.54004	2.45056	5.58777	4.89197	3.55469	4.70032	4.59534	3.56812
153.3	3.5553	2.4353	5.58777	4.89197	3.55225	4.69727	4.5929	3.58154
153.4	3.55835	2.44446	5.58472	4.87366	3.55713	4.71375	4.59656	3.57483
153.5	3.5675	2.44751	5.59692	4.90112	3.55408	4.69727	4.5929	3.57178
153.6	3.54004	2.46277	5.58167	4.87976	3.5675	4.70337	4.59961	3.58215
153.7	3.54004	2.44141	5.59387	4.89807	3.56445	4.71191	4.58923	3.57666
153.8	3.53394	2.45972	5.59082	4.89502	3.55713	4.7052	4.60144	3.56323
153.9	3.53699	2.45056	5.59387	4.90417	3.55896	4.70581	4.58923	3.56873
154	3.54309	2.43835	5.58777	4.89807	3.54919	4.70764	4.58984	3.5907
154.1	3.54614	2.44141	5.58167	4.88892	3.56628	4.70642	4.59778	3.57483
154.2	3.53699	2.46887	5.60303	4.90112	3.56201	4.70032	4.59229	3.58704
154.3	3.54309	2.43225	5.59082	4.88281	3.55591	4.71863	4.60449	3.58032
154.4	3.53699	2.45056	5.59387	4.88586	3.54858	4.70947	4.58984	3.57788
154.5	3.5675	2.46582	5.59387	4.90112	3.57056	4.7113	4.58557	3.5791
154.6	3.54919	2.44751	5.59082	4.87061	3.56262	4.6991	4.59534	3.56873
154.7	3.53699	2.48108	5.59082	4.91028	3.56018	4.70947	4.58313	3.57361
154.8	3.54919	2.4292	5.59692	4.89197	3.55591	4.70764	4.60022	3.57727
154.9	3.57056	2.46277	5.59082	4.89502	3.55774	4.70093	4.60083	3.58459
155	3.54309	2.46887	5.59998	4.90723	3.5614	4.71313	4.59778	3.58337
155.1	3.54309	2.45667	5.58777	4.89502	3.56262	4.70764	4.59534	3.57849
155.2	3.54004	2.46277	5.59387	4.89807	3.5614	4.70581	4.58801	3.57361
155.3	3.5614	2.47803	5.59692	4.88892	3.55042	4.70581	4.6106	3.57178
155.4	3.55225	2.44751	5.59387	4.88892	3.55164	4.71802	4.60632	3.5791
155.5	3.54004	2.45361	5.57861	4.90723	3.55774	4.69666	4.59534	3.58826
155.6	3.54004	2.45056	5.58777	4.89502	3.56201	4.70154	4.59595	3.57605
155.7	3.5675	2.45972	5.59692	4.88892	3.55652	4.7113	4.60266	3.57727
155.8	3.54004	2.45667	5.59082	4.88586	3.56323	4.71191	4.60022	3.58093
155.9	3.54309	2.43225	5.59082	4.90417	3.5614	4.6991	4.59961	3.56506
156	3.53088	2.46582	5.58777	4.91638	3.56506	4.70764	4.58679	3.58032
156.1	3.54919	2.47803	5.59692	4.89502	3.56323	4.71069	4.599	3.57666
156.2	3.52783	2.45056	5.59692	4.88892	3.55286	4.70154	4.599	3.57788
156.3	3.54919	2.46887	5.59692	4.88892	3.56995	4.70947	4.59473	3.58032
156.4	3.54614	2.45667	5.60608	4.89502	3.56201	4.70581	4.59473	3.57788
156.5	3.54614	2.46277	5.58472	4.92249	3.55713	4.70337	4.58801	3.58276
156.6	3.5553	2.45972	5.60608	4.90112	3.56812	4.71008	4.58984	3.57422
156.7	3.54004	2.45972	5.59082	4.90112	3.56934	4.71008	4.5929	3.58093
156.8	3.51868	2.45972	5.60913	4.90112	3.55835	4.69421	4.60266	3.5791
156.9	3.54919	2.48108	5.61829	4.90417	3.56445	4.70032	4.58984	3.57666
157	3.55835	2.47803	5.60303	4.89502	3.5553	4.70337	4.59412	3.58887
157.1	3.55225	2.48108	5.59998	4.91638	3.55774	4.70337	4.59534	3.58276
157.2	3.52173	2.45361	5.60913	4.89197	3.56445	4.70886	4.6051	3.5675
157.3	3.53699	2.46887	5.59692	4.91333	3.57178	4.69788	4.59106	3.58032
157.4	3.54919	2.48718	5.61829	4.91638	3.56201	4.70886	4.59045	3.57605
157.5	3.53699	2.47192	5.60608	4.89197	3.56384	4.70459	4.59473	3.56812
157.6	3.54309	2.48108	5.59387	4.90112	3.57178	4.70276	4.58801	3.57422
157.7	3.52783	2.48108	5.60608	4.90417	3.56812	4.70032	4.5874	3.57056
157.8	3.53088	2.46887	5.60608	4.91333	3.5614	4.68994	4.59534	3.57056
157.9	3.5614	2.46582	5.60303	4.89197	3.57422	4.70703	4.59778	3.59253
158	3.52478	2.47498	5.60303	4.91028	3.56873	4.69788	4.60022	3.57239
158.1	3.53088	2.47192	5.59998	4.92249	3.56567	4.70703	4.58557	3.56995
158.2	3.53088	2.47498	5.61218	4.89807	3.56873	4.68994	4.57886	3.58398
158.3	3.53394	2.46582	5.61523	4.90112	3.5675	4.69543	4.60083	3.57971
158.4	3.54614	2.48108	5.62439	4.91943	3.56384	4.70764	4.59656	3.57239
158.5	3.5614	2.48108	5.59387	4.91943	3.56384	4.69543	4.59229	3.5791
158.6	3.54309	2.48413	5.61523	4.91028	3.58032	4.69543	4.5813	3.57849
158.7	3.53699	2.44751	5.62439	4.91943	3.57239	4.71863	4.59595	3.58704
158.8	3.52173	2.48413	5.61829	4.89807	3.56567	4.6759	4.59167	3.573
158.9	3.54309	2.47803	5.61829	4.91638	3.57483	4.70154	4.58984	3.57056
159	3.52173	2.48413	5.61523	4.91638	3.56873	4.71069	4.58679	3.58459
159.1	3.55225	2.47803	5.61523	4.91943	3.56323	4.67896	4.58435	3.57544
159.2	3.53699	2.46887	5.62744	4.92249	3.57056	4.7052	4.58191	3.58521
159.3	3.53394	2.47803	5.61218	4.93164	3.56995	4.6991	4.58618	3.56934
159.4	3.53699	2.49939	5.62134	4.92554	3.57117	4.69543	4.58618	3.57483
159.5	3.5553	2.46277	5.60608	4.9408	3.56628	4.68933	4.60327	3.56689
159.6	3.52173	2.49939	5.61829	4.93469	3.57666	4.69666	4.60022	3.56445
159.7	3.52783	2.48413	5.61523	4.93774	3.57605	4.70459	4.59045	3.57422
159.8	3.54309	2.46277	5.61523	4.90723	3.56445	4.68506	4.60266	3.57178
159.9	3.52478	2.49023	5.62439	4.92249	3.56506	4.69666	4.58679	3.58215
160	3.53088	2.46887	5.63049	4.93774	3.57666	4.69788	4.59961	3.57971
160.1	3.52478	2.49634	5.60303	4.92249	3.57056	4.68384	4.58069	3.58765
160.2	3.53394	2.48718	5.61523	4.90723	3.57361	4.70154	4.58679	3.56628
160.3	3.53088	2.48718	5.60303	4.93164	3.58154	4.68689	4.58984	3.57727
160.4	3.53699	2.50549	5.59998	4.91943	3.58154	4.69788	4.5929	3.56934
160.5	3.52173	2.47498	5.61829	4.93774	3.57605	4.67773	4.58252	3.58337
160.6	3.53088	2.46887	5.59692	4.92249	3.57483	4.69482	4.58984	3.57788
160.7	3.54919	2.48718	5.61829	4.92249	3.56079	4.68811	4.58252	3.56262
160.8	3.51563	2.50854	5.61218	4.91638	3.58704	4.68994	4.57642	3.57239
160.9	3.53699	2.50244	5.60303	4.92554	3.56445	4.69177	4.59045	3.57056
161	3.53394	2.48718	5.61218	4.92859	3.56567	4.68018	4.58862	3.58093
161.1	3.53394	2.49939	5.60913	4.93774	3.57666	4.69604	4.57336	3.57727
161.2	3.53394	2.50244	5.60608	4.92859	3.58704	4.67468	4.58313	3.56873
161.3	3.53394	2.48718	5.59692	4.91943	3.58032	4.68872	4.58374	3.57666
161.4	3.52783	2.49329	5.59998	4.94995	3.58521	4.67957	4.58435	3.57605
161.5	3.52478	2.49023	5.61829	4.94385	3.56689	4.68628	4.58984	3.56689
161.6	3.53699	2.50244	5.58777	4.93774	3.57178	4.68933	4.58069	3.5791
161.7	3.54004	2.5238	5.61829	4.93164	3.59314	4.69116	4.58557	3.58093
161.8	3.54309	2.50854	5.60913	4.93469	3.57666	4.6759	4.57886	3.57544
161.9	3.50647	2.50854	5.59387	4.9408	3.57849	4.68689	4.58679	3.59131
162	3.53699	2.49939	5.60913	4.9469	3.56995	4.68567	4.56787	3.58704
162.1	3.52783	2.49939	5.59387	4.93774	3.57178	4.68323	4.58069	3.58765
162.2	3.52783	2.50854	5.59387	4.91943	3.5614	4.69482	4.59167	3.59131
162.3	3.54919	2.49939	5.59998	4.9408	3.57727	4.6814	4.58069	3.5907
162.4	3.51868	2.51465	5.59998	4.93774	3.57849	4.67896	4.56665	3.58521
162.5	3.53088	2.49023	5.59082	4.9408	3.57239	4.67957	4.58984	3.58337
162.6	3.53699	2.49023	5.59387	4.93164	3.57788	4.68506	4.57642	3.57727
162.7	3.54004	2.52075	5.59692	4.9408	3.58704	4.68506	4.57764	3.57483
162.8	3.52783	2.50854	5.61218	4.93774	3.58154	4.68689	4.5752	3.5907
162.9	3.51257	2.47498	5.58167	4.92859	3.57483	4.68506	4.58923	3.58093
163	3.54309	2.52991	5.60913	4.93774	3.58887	4.68567	4.57031	3.59192
163.1	3.53699	2.48413	5.61829	4.92859	3.58948	4.6759	4.5752	3.57544
163.2	3.52478	2.5116	5.59998	4.953	3.58582	4.67285	4.57947	3.58765
163.3	3.50647	2.5238	5.59998	4.93469	3.57849	4.68018	4.5874	3.60657
163.4	3.55225	2.50549	5.60608	4.94385	3.57361	4.67712	4.57031	3.58459
163.5	3.51868	2.49634	5.60303	4.93774	3.58398	4.67957	4.59045	3.59131
163.6	3.51563	2.50244	5.61523	4.953	3.58765	4.68262	4.57947	3.58337
163.7	3.50952	2.49939	5.59387	4.93469	3.58337	4.6759	4.56177	3.58826
163.8	3.54004	2.5177	5.60608	4.953	3.58521	4.68079	4.57947	3.58704
163.9	3.52783	2.52075	5.60913	4.93164	3.5791	4.67468	4.56482	3.58887
164	3.53699	2.50244	5.59692	4.94385	3.57727	4.68018	4.5752	3.58521
164.1	3.51257	2.49634	5.61523	4.93164	3.58337	4.6759	4.57825	3.58398
164.2	3.52783	2.50854	5.60303	4.96216	3.5907	4.68567	4.57886	3.60413
164.3	3.51563	2.49634	5.59082	4.93164	3.60046	4.68689	4.57458	3.60168
164.4	3.54004	2.52991	5.62744	4.92859	3.58398	4.67651	4.57458	3.60474
164.5	3.50952	2.50549	5.59387	4.94385	3.57605	4.67712	4.57336	3.59863
164.6	3.51257	2.34985	5.60913	4.94995	3.58154	4.67407	4.57703	3.5907
164.7	3.51868	2.55737	5.59998	4.93774	3.57361	4.67529	4.57947	3.59619
164.8	3.53088	2.53296	5.61829	4.92554	3.58337	4.68811	4.58008	3.58643
164.9	3.50647	2.52686	5.60608	4.95911	3.59985	4.6814	4.56787	3.59253
165	3.52173	2.51465	5.60913	4.9469	3.58337	4.68262	4.57886	3.60168
165.1	3.51563	2.52075	5.60303	4.93164	3.60168	4.67712	4.57642	3.59192
165.2	3.52478	2.51465	5.56946	4.93774	3.58093	4.68018	4.56482	3.59131
165.3	3.51257	2.53296	5.59082	4.93469	3.58826	4.68201	4.58069	3.6084
165.4	3.50952	2.50854	5.60303	4.9469	3.59009	4.67651	4.58435	3.59863
165.5	3.53394	2.48718	5.60303	4.93164	3.58337	4.69604	4.56177	3.60046
165.6	3.50952	2.52991	5.59998	4.953	3.57666	4.6698	4.56482	3.60352
165.7	3.52478	2.49939	5.61218	4.93774	3.59131	4.68689	4.57764	3.58582
165.8	3.51868	2.5238	5.59692	4.92859	3.59314	4.67957	4.57153	3.59863
165.9	3.51563	2.54517	5.59692	4.94385	3.60229	4.6759	4.57947	3.60657
166	3.52783	2.5177	5.60913	4.94385	3.59497	4.68384	4.56909	3.60291
166.1	3.51257	2.5116	5.60303	4.93774	3.59863	4.69543	4.58679	3.60107
166.2	3.53699	2.50854	5.59998	4.95605	3.61023	4.67468	4.57214	3.60168
166.3	3.50952	2.5238	5.60608	4.93774	3.59192	4.68079	4.58191	3.60962
166.4	3.52478	2.5177	5.60913	4.93774	3.59314	4.67896	4.57458	3.61633
166.5	3.52783	2.52686	5.60913	4.953	3.57849	4.67773	4.58679	3.60596
166.6	3.52478	2.52075	5.59998	4.93164	3.59558	4.67957	4.56726	3.62244
166.7	3.50647	2.50854	5.60303	4.93774	3.59314	4.68567	4.57581	3.61084
166.8	3.50952	2.5116	5.60913	4.94995	3.59619	4.69238	4.57336	3.61511
166.9	3.52478	2.54517	5.60303	4.93774	3.5968	4.68323	4.56848	3.61755
167	3.53088	2.5177	5.61829	4.92249	3.59863	4.6875	4.57581	3.61694
167.1	3.53088	2.5177	5.59387	4.94995	3.58948	4.67957	4.57764	3.60168
167.2	3.50952	2.5116	5.61523	4.94995	3.59558	4.68201	4.56909	3.61755
167.3	3.50037	2.53601	5.61218	4.92859	3.60046	4.68323	4.57336	3.59497
167.4	3.53088	2.52686	5.60303	4.9408	3.59558	4.68689	4.57214	3.61877
167.5	3.51563	2.52686	5.61218	4.92859	3.59009	4.68872	4.58801	3.60107
167.6	3.53088	2.51465	5.60913	4.93469	3.60535	4.68811	4.58008	3.62366
167.7	3.52173	2.53601	5.60303	4.92859	3.59009	4.68445	4.56848	3.62488
167.8	3.50952	2.49939	5.59998	4.92859	3.5907	4.68628	4.58984	3.62061
167.9	3.53088	2.52991	5.59998	4.94995	3.60291	4.6875	4.58069	3.61267
168	3.49731	2.5177	5.61218	4.92249	3.58887	4.68628	4.57397	3.61267
168.1	3.50647	2.54517	5.59998	4.92859	3.59802	4.69238	4.57703	3.6145
168.2	3.51868	2.52991	5.59387	4.93774	3.58826	4.68994	4.56848	3.6145
168.3	3.53394	2.53296	5.60608	4.93469	3.60107	4.68689	4.56726	3.61633
168.4	3.52783	2.53601	5.60303	4.92554	3.59375	4.69849	4.58374	3.61938
168.5	3.50342	2.50854	5.59387	4.9408	3.59802	4.68079	4.5874	3.6261
168.6	3.50952	2.53296	5.59387	4.94385	3.59375	4.69116	4.57825	3.61877
168.7	3.52783	2.52991	5.60913	4.953	3.60229	4.69971	4.57947	3.62488
168.8	3.53088	2.50854	5.60608	4.92859	3.60107	4.68018	4.58313	3.63281
168.9	3.50952	2.53601	5.60303	4.93774	3.61206	4.69604	4.59595	3.62305
169	3.49731	2.5238	5.59692	4.93774	3.60046	4.6936	4.57764	3.62793
169.1	3.51257	2.52686	5.61523	4.93774	3.59619	4.68994	4.59167	3.62915
169.2	3.50952	2.50854	5.61218	4.94385	3.60535	4.68994	4.58008	3.62915
169.3	3.52478	2.52991	5.61218	4.93774	3.60291	4.69971	4.58618	3.63342
169.4	3.51868	2.51465	5.61829	4.9408	3.60046	4.68323	4.59106	3.62366
169.5	3.51257	2.52075	5.59692	4.93774	3.59985	4.69971	4.5813	3.62488
169.6	3.48816	2.5238	5.61523	4.92859	3.60168	4.70276	4.58923	3.61328
169.7	3.53394	2.53296	5.60608	4.94995	3.60718	4.69421	4.57581	3.61145
169.8	3.50342	2.52991	5.62134	4.9408	3.59924	4.68872	4.58191	3.61206
169.9	3.51563	2.50244	5.60913	4.92859	3.60229	4.69543	4.58923	3.62183
170	3.51868	2.5116	5.60608	4.93774	3.60596	4.69604	4.58923	3.62183
170.1	3.49426	2.52686	5.60608	4.92859	3.59314	4.70337	4.59229	3.63037
170.2	3.53088	2.52991	5.62439	4.94385	3.61267	4.69177	4.57947	3.62549
170.3	3.50037	2.48718	5.63049	4.93469	3.60168	4.7052	4.58679	3.62427
170.4	3.51868	2.53296	5.6366	4.92554	3.60779	4.6875	4.58557	3.61694
170.5	3.49426	2.52686	5.61829	4.93164	3.60107	4.70032	4.57581	3.62854
170.6	3.51868	2.5116	5.60913	4.9469	3.60596	4.71069	4.57642	3.63037
170.7	3.50952	2.52686	5.63049	4.93774	3.61206	4.69299	4.58923	3.62671
170.8	3.50342	2.51465	5.61523	4.92249	3.63159	4.70154	4.57886	3.62305
170.9	3.50952	2.53906	5.62134	4.93164	3.59863	4.6936	4.58252	3.62854
171	3.50647	2.54211	5.61523	4.94385	3.61084	4.68994	4.58801	3.62488
171.1	3.50342	2.5116	5.62744	4.9469	3.59802	4.70215	4.59717	3.62427
171.2	3.53088	2.53601	5.61829	4.93469	3.60657	4.6875	4.57764	3.63037
171.3	3.50342	2.53906	5.63049	4.93164	3.60474	4.69788	4.58313	3.61633
171.4	3.50342	2.5238	5.63965	4.92249	3.60107	4.69543	4.58679	3.62244
171.5	3.51563	2.53601	5.63049	4.9469	3.60718	4.70398	4.58313	3.63037
171.6	3.51563	2.53296	5.62744	4.94385	3.60657	4.69788	4.59229	3.62305
171.7	3.50037	2.52991	5.65186	4.94385	3.61267	4.69666	4.58313	3.62854
171.8	3.49426	2.51465	5.61829	4.93469	3.60107	4.70215	4.58252	3.62549
171.9	3.50647	2.52686	5.63049	4.9408	3.61023	4.69788	4.58618	3.62488
172	3.51563	2.53296	5.64575	4.94385	3.60107	4.70642	4.59412	3.62793
172.1	3.49121	2.53296	5.63049	4.93774	3.59192	4.69788	4.58435	3.62305
172.2	3.52478	2.5177	5.63049	4.94385	3.60596	4.7052	4.58557	3.61694
172.3	3.50952	2.53906	5.64575	4.93164	3.60596	4.68994	4.59534	3.63464
172.4	3.51257	2.5116	5.63965	4.94385	3.59924	4.70215	4.57764	3.62549
172.5	3.52783	2.53906	5.64575	4.93164	3.61084	4.6991	4.5874	3.62305
172.6	3.47595	2.53601	5.64575	4.93774	3.60474	4.69604	4.5813	3.61633
172.7	3.52783	2.51465	5.6488	4.94385	3.60657	4.70337	4.5874	3.62427
172.8	3.50342	2.54517	5.6366	4.94385	3.60718	4.70459	4.59656	3.61877
172.9	3.51257	2.5177	5.61523	4.9469	3.60046	4.70093	4.5929	3.62976
173	3.48511	2.50549	5.6488	4.94385	3.6084	4.68445	4.58252	3.62183
173.1	3.50342	2.53906	5.63354	4.95911	3.60168	4.69482	4.58252	3.62854
173.2	3.49426	2.52991	5.6366	4.9469	3.60352	4.6991	4.6051	3.62793
173.3	3.50037	2.53906	5.64575	4.96216	3.61084	4.69666	4.58008	3.62915
173.4	3.51868	2.54211	5.65186	4.94995	3.60901	4.69849	4.5929	3.62
173.5	3.52478	2.53601	5.63354	4.96216	3.60901	4.6875	4.59839	3.62061
173.6	3.50342	2.55127	5.65491	4.953	3.61572	4.70459	4.58252	3.64258
173.7	3.50647	2.53296	5.66711	4.96521	3.60779	4.69727	4.57092	3.62976
173.8	3.50647	2.52686	5.6488	4.94385	3.61755	4.70154	4.57642	3.62793
173.9	3.50647	2.54517	5.66711	4.953	3.6145	4.69055	4.59106	3.62061
174	3.49426	2.53601	5.65186	4.953	3.61694	4.69177	4.59656	3.62244
174.1	3.50647	2.5177	5.65796	4.94995	3.60535	4.69666	4.58679	3.63342
174.2	3.52478	2.54822	5.65796	4.95911	3.60291	4.6991	4.5929	3.62
174.3	3.51257	2.52991	5.65491	4.93469	3.61816	4.6875	4.57153	3.62976
174.4	3.50647	2.54517	5.63965	4.953	3.61267	4.6936	4.58862	3.63159
174.5	3.49426	2.53906	5.66101	4.95911	3.60474	4.69116	4.57336	3.62366
174.6	3.50342	2.53906	5.66406	4.96216	3.61572	4.69727	4.58374	3.62366
174.7	3.50037	2.53296	5.65796	4.96521	3.60718	4.6875	4.58435	3.62976
174.8	3.50037	2.54822	5.65186	4.95911	3.61023	4.68689	4.5813	3.61389
174.9	3.50342	2.53601	5.67627	4.96826	3.61633	4.69604	4.58008	3.60535
175	3.50647	2.56653	5.65491	4.9408	3.61633	4.68384	4.59473	3.61328
175.1	3.50647	2.52991	5.66101	4.953	3.62061	4.69116	4.58252	3.62549
175.2	3.50342	2.53601	5.68542	4.96521	3.61572	4.68628	4.58496	3.62122
175.3	3.51563	2.55432	5.67017	4.95911	3.6084	4.68384	4.57825	3.61938
175.4	3.48816	2.55432	5.66711	4.96521	3.60596	4.68201	4.58496	3.61694
175.5	3.50647	2.52686	5.66406	4.94385	3.62549	4.68323	4.58801	3.63098
175.6	3.49426	2.56653	5.68542	4.96826	3.60901	4.69666	4.58374	3.60657
175.7	3.49121	2.54211	5.66711	4.96216	3.61938	4.6875	4.5813	3.6261
175.8	3.52783	2.53296	5.65796	4.96826	3.61877	4.68201	4.58069	3.62122
175.9	3.50037	2.55432	5.68542	4.96826	3.61877	4.69177	4.59106	3.63037
176	3.50342	2.56042	5.67322	4.96216	3.61023	4.67163	4.58435	3.61389
176.1	3.50647	2.52991	5.68542	4.96521	3.62122	4.69482	4.58496	3.61938
176.2	3.49121	2.53601	5.67627	4.97742	3.61816	4.68201	4.58191	3.60596
176.3	3.48511	2.54211	5.68237	4.96826	3.61084	4.6936	4.59412	3.62854
176.4	3.48816	2.53906	5.68542	4.96521	3.61694	4.68872	4.58557	3.61328
176.5	3.49731	2.53601	5.65491	4.97437	3.62427	4.66919	4.57153	3.61145
176.6	3.50647	2.57263	5.67017	4.96521	3.62488	4.69299	4.59045	3.61938
176.7	3.50952	2.54211	5.67932	4.97437	3.62854	4.67468	4.57581	3.61267
176.8	3.51257	2.53906	5.67017	4.94995	3.63098	4.67651	4.58679	3.6322
176.9	3.50952	2.54517	5.69153	4.96826	3.60901	4.68933	4.58069	3.61206
177	3.49121	2.54211	5.67017	4.97437	3.60413	4.66858	4.58008	3.62122
177.1	3.50647	2.54822	5.66711	4.95605	3.61389	4.68933	4.58679	3.62244
177.2	3.50037	2.54822	5.66101	4.98352	3.60352	4.68262	4.57153	3.60535
177.3	3.49426	2.56958	5.67932	4.96826	3.62793	4.68262	4.57214	3.62671
177.4	3.49731	2.56042	5.67627	4.96521	3.62122	4.66553	4.57153	3.61572
177.5	3.50952	2.53906	5.67627	4.96826	3.61328	4.67346	4.57092	3.60901
177.6	3.51257	2.53601	5.66406	4.98657	3.62183	4.66797	4.58679	3.62061
177.7	3.479	2.55127	5.66406	4.96521	3.61145	4.68201	4.58496	3.62122
177.8	3.48816	2.56042	5.67932	4.97742	3.62732	4.66553	4.57214	3.61389
177.9	3.50952	2.55737	5.67627	4.97437	3.62549	4.67224	4.58374	3.6261
178	3.50037	2.56042	5.67017	4.97742	3.62122	4.66858	4.58557	3.6145
178.1	3.50647	2.56042	5.67932	4.97742	3.61389	4.67834	4.57947	3.59802
178.2	3.50952	2.55737	5.67932	4.98352	3.62488	4.66797	4.57764	3.61755
178.3	3.48206	2.57874	5.68237	4.98352	3.60901	4.67834	4.57092	3.61877
178.4	3.51868	2.56958	5.68237	4.98657	3.61816	4.67224	4.56787	3.61145
178.5	3.49426	2.57874	5.68237	4.97437	3.62732	4.67224	4.57092	3.62
178.6	3.51257	2.56348	5.68237	4.98657	3.6145	4.67529	4.57947	3.6322
178.7	3.51563	2.55127	5.66711	4.97437	3.62427	4.68018	4.56482	3.62488
178.8	3.49731	2.54822	5.67017	4.97742	3.63464	4.67346	4.58313	3.61633
178.9	3.48816	2.56348	5.68848	4.98352	3.6145	4.6814	4.57458	3.63464
179	3.50647	2.57263	5.68237	4.96826	3.61755	4.66614	4.59229	3.62671
179.1	3.49731	2.56042	5.66711	4.96826	3.61877	4.67346	4.56787	3.62305
179.2	3.50037	2.56042	5.68237	4.98962	3.63403	4.66797	4.58008	3.62122
179.3	3.50647	2.56042	5.67322	4.99268	3.62244	4.67102	4.57825	3.61694
179.4	3.50342	2.55737	5.67627	4.97742	3.63098	4.68506	4.56848	3.61938
179.5	3.51868	2.55432	5.68542	4.98352	3.61938	4.67529	4.57458	3.63525
179.6	3.50037	2.57874	5.68542	4.97437	3.62671	4.66187	4.55994	3.62183
179.7	3.49426	2.56958	5.68542	4.98352	3.61511	4.6698	4.57214	3.62122
179.8	3.52478	2.56653	5.68848	4.99268	3.62061	4.66431	4.57031	3.62732
179.9	3.50342	2.57568	5.69153	4.98047	3.62976	4.68079	4.5813	3.63098
180	3.48816	2.53601	5.67627	4.97131	3.61816	4.67041	4.57092	3.63037
180.1	3.49426	2.58484	5.68542	4.98657	3.62	4.67712	4.56848	3.62793
180.2	3.51868	2.57263	5.68848	4.97437	3.63464	4.65515	4.57153	3.62671
180.3	3.479	2.57568	5.66406	4.97437	3.62976	4.66309	4.5575	3.62244
180.4	3.50342	2.55737	5.69153	4.98657	3.63159	4.65759	4.57703	3.63342
180.5	3.48206	2.58484	5.69153	4.98657	3.6322	4.6582	4.57397	3.62976
180.6	3.51868	2.53906	5.67932	4.95911	3.61206	4.67773	4.56543	3.6322
180.7	3.51563	2.59094	5.68542	4.98962	3.63098	4.67468	4.57886	3.62183
180.8	3.50952	2.57874	5.67932	4.98657	3.62549	4.67529	4.56909	3.63953
180.9	3.49731	2.55737	5.67627	4.97131	3.62854	4.67346	4.56909	3.62549
181	3.50037	2.57874	5.67932	4.97131	3.61877	4.66919	4.56848	3.63464
181.1	3.50952	2.55737	5.68542	4.97437	3.63098	4.67041	4.58435	3.63708
181.2	3.50647	2.57263	5.67017	4.96826	3.62549	4.66675	4.56909	3.63525
181.3	3.479	2.57263	5.67017	4.98352	3.62976	4.68323	4.56482	3.63831
181.4	3.48816	2.57874	5.67932	4.96826	3.62732	4.6759	4.57703	3.62671
181.5	3.49731	2.57568	5.69458	4.99268	3.6322	4.68079	4.56299	3.63953
181.6	3.50342	2.56042	5.66711	4.99268	3.62976	4.67651	4.5752	3.6261
181.7	3.52783	2.57568	5.68848	4.96826	3.62671	4.67407	4.57092	3.62854
181.8	3.50342	2.58789	5.66101	4.98047	3.61389	4.6698	4.55627	3.63892
181.9	3.49426	2.56653	5.65491	4.97437	3.63892	4.6698	4.57275	3.63525
182	3.50037	2.58179	5.65491	4.98352	3.63037	4.67712	4.57947	3.64746
182.1	3.50037	2.58179	5.65796	4.96826	3.62854	4.66797	4.57092	3.62366
182.2	3.49121	2.56348	5.66406	4.97742	3.62671	4.67529	4.57642	3.63647
182.3	3.48206	2.57874	5.66711	4.97131	3.64075	4.67224	4.57153	3.63342
182.4	3.50647	2.56042	5.66101	4.97437	3.63098	4.6759	4.5813	3.63464
182.5	3.479	2.57263	5.66711	4.98047	3.62732	4.67529	4.56665	3.6377
182.6	3.49731	2.56653	5.65491	4.96826	3.63708	4.67041	4.57886	3.64929
182.7	3.48511	2.58484	5.66711	4.98047	3.62671	4.67285	4.55933	3.64868
182.8	3.51257	2.57874	5.66406	4.97131	3.63403	4.67041	4.56909	3.64197
182.9	3.49731	2.57568	5.67322	4.95911	3.62305	4.68079	4.55933	3.64746
183	3.50037	2.57263	5.66711	4.95911	3.62793	4.67041	4.57947	3.65723
183.1	3.50342	2.57874	5.65186	4.98352	3.62976	4.67041	4.57825	3.63892
183.2	3.48206	2.58484	5.67322	4.98657	3.63159	4.68323	4.57153	3.63464
183.3	3.50952	2.57568	5.65796	4.98657	3.64563	4.66187	4.56177	3.64502
183.4	3.50037	2.55432	5.66711	4.98962	3.62915	4.67102	4.57458	3.64746
183.5	3.48511	2.58179	5.66101	4.97131	3.64075	4.67285	4.56299	3.65173
183.6	3.48511	2.56958	5.66101	4.97437	3.64075	4.68018	4.55933	3.64258
183.7	3.51257	2.59094	5.66101	4.97131	3.63525	4.67651	4.58435	3.64014
183.8	3.48511	2.57263	5.65796	4.97437	3.62732	4.6637	4.5752	3.64746
183.9	3.50037	2.57568	5.66406	4.99268	3.64441	4.67712	4.57581	3.65479
184	3.48816	2.58484	5.66406	4.97131	3.62854	4.67529	4.56909	3.64319
184.1	3.49731	2.58484	5.66101	4.97131	3.63403	4.68384	4.57275	3.65173
184.2	3.51868	2.57568	5.65491	4.97131	3.63708	4.68689	4.57825	3.64136
184.3	3.48206	2.55737	5.65796	4.96521	3.62976	4.68262	4.57092	3.65784
184.4	3.50342	2.6001	5.66101	4.96521	3.63831	4.68018	4.57397	3.64075
184.5	3.48206	2.58179	5.6427	4.98962	3.63403	4.68445	4.55322	3.64807
184.6	3.51257	2.58179	5.66711	4.96826	3.63403	4.67224	4.57214	3.6554
184.7	3.49731	2.55737	5.64575	4.95911	3.63831	4.67773	4.56787	3.6615
184.8	3.50037	2.57568	5.65491	4.97437	3.63159	4.69604	4.57642	3.65723
184.9	3.479	2.58484	5.63354	4.96826	3.64868	4.67834	4.56238	3.64563
185	3.49731	2.59094	5.64575	4.98352	3.63586	4.66553	4.56726	3.64441
185.1	3.49731	2.57874	5.65186	4.97131	3.64197	4.68201	4.57947	3.65417
185.2	3.50037	2.57874	5.65186	4.98657	3.64075	4.68506	4.5813	3.65479
185.3	3.48816	2.6062	5.6488	4.96826	3.63342	4.68567	4.57642	3.66394
185.4	3.51257	2.56958	5.63965	4.97742	3.64746	4.68689	4.57703	3.65417
185.5	3.49426	2.55737	5.64575	4.97437	3.62671	4.68384	4.57947	3.6499
185.6	3.51257	2.56653	5.64575	4.98657	3.64075	4.69666	4.57642	3.6676
185.7	3.48816	2.59705	5.6366	4.96216	3.64685	4.67834	4.57947	3.64563
185.8	3.48816	2.57263	5.63965	4.97742	3.63586	4.68811	4.58191	3.66211
185.9	3.50037	2.58484	5.66406	4.97742	3.64929	4.67834	4.57275	3.65479
186	3.50647	2.58789	5.63965	4.98047	3.63586	4.68811	4.57092	3.65417
186.1	3.49731	2.59094	5.63354	4.96826	3.63464	4.69177	4.57825	3.65356
186.2	3.49121	2.57874	5.63965	4.97742	3.65356	4.70093	4.57825	3.65906
186.3	3.50037	2.56958	5.63965	4.95605	3.63647	4.69177	4.5697	3.6554
186.4	3.50647	2.57568	5.61218	4.98352	3.63831	4.67834	4.58313	3.65967
186.5	3.48206	2.56348	5.63354	4.96826	3.63342	4.68262	4.56665	3.6554
186.6	3.4729	2.57874	5.62744	4.98047	3.63647	4.69116	4.57092	3.65967
186.7	3.50037	2.58789	5.62439	4.96521	3.65479	4.67834	4.58923	3.6499
186.8	3.48511	2.56653	5.6366	4.97131	3.63342	4.69177	4.56482	3.65051
186.9	3.48816	2.58484	5.6366	4.97437	3.6499	4.6936	4.58252	3.66699
187	3.47595	2.55432	5.63354	4.97131	3.63464	4.69299	4.57825	3.6615
187.1	3.48816	2.56958	5.63049	4.97742	3.64014	4.68384	4.5813	3.66516
187.2	3.48511	2.57263	5.62439	4.98047	3.63953	4.68872	4.59595	3.64075
187.3	3.50037	2.58179	5.6366	4.96216	3.66638	4.68994	4.57947	3.66638
187.4	3.49731	2.58484	5.6427	4.95911	3.65723	4.70276	4.5813	3.65662
187.5	3.46375	2.57874	5.6366	4.97131	3.65295	4.68323	4.58618	3.66272
187.6	3.52478	2.56348	5.6488	4.98352	3.63953	4.69055	4.58557	3.67615
187.7	3.48816	2.58179	5.63965	4.96826	3.63647	4.68933	4.5929	3.65295
187.8	3.49426	2.59705	5.62744	4.98352	3.6615	4.68628	4.58313	3.64807
187.9	3.49121	2.57874	5.63049	4.99878	3.6377	4.69604	4.56604	3.66028
188	3.479	2.56348	5.63965	4.96826	3.64502	4.69421	4.57764	3.65295
188.1	3.49426	2.57568	5.6488	4.97131	3.63647	4.70459	4.58008	3.65051
188.2	3.51257	2.57263	5.64575	4.97437	3.64746	4.69055	4.57275	3.64929
188.3	3.48206	2.57874	5.63049	4.99268	3.64563	4.69116	4.59167	3.66028
188.4	3.479	2.58789	5.63049	4.97131	3.64136	4.69788	4.58984	3.64929
188.5	3.51868	2.57568	5.6427	4.96216	3.64746	4.68079	4.58984	3.65784
188.6	3.48511	2.59705	5.6366	4.99573	3.63281	4.7113	4.58313	3.65356
188.7	3.479	2.56653	5.63965	4.98657	3.62793	4.69666	4.58618	3.6615
188.8	3.48511	2.59094	5.62439	4.97742	3.64624	4.68933	4.58618	3.65601
188.9	3.4729	2.58484	5.62744	4.97437	3.65356	4.69543	4.58801	3.66089
189	3.48511	2.58789	5.6427	4.98657	3.64014	4.69177	4.58801	3.65906
189.1	3.49731	2.59705	5.62439	4.96216	3.64624	4.6875	4.58557	3.66089
189.2	3.50037	2.58484	5.6427	4.98352	3.64868	4.69055	4.57825	3.66577
189.3	3.49426	2.57263	5.63354	4.95605	3.64502	4.6637	4.58069	3.66028
189.4	3.50037	2.54517	5.6366	4.98962	3.64685	4.69849	4.58252	3.65173
189.5	3.48511	2.59399	5.6366	4.96826	3.64319	4.69666	4.58435	3.66089
189.6	3.479	2.57874	5.62134	4.99573	3.65662	4.68079	4.58496	3.65906
189.7	3.49121	2.59094	5.62134	4.97437	3.65417	4.70276	4.58923	3.65479
189.8	3.49121	2.59094	5.6366	4.97742	3.66516	4.69727	4.57642	3.64563
189.9	3.50647	2.58179	5.61523	4.98352	3.65051	4.69177	4.58618	3.63831
190	3.48206	2.58484	5.6366	4.97437	3.64441	4.68201	4.5752	3.64441
190.1	3.4729	2.56958	5.64575	4.98047	3.65601	4.69727	4.5874	3.65417
190.2	3.51868	2.57874	5.6366	4.96826	3.6438	4.69238	4.58862	3.65173
190.3	3.46985	2.60315	5.63049	4.96521	3.65356	4.69543	4.58069	3.67004
190.4	3.50342	2.56653	5.6366	4.97742	3.6554	4.69299	4.57886	3.65601
190.5	3.479	2.57568	5.63354	4.98047	3.65234	4.67468	4.58801	3.65662
190.6	3.48816	2.58179	5.64575	4.98657	3.6554	4.69971	4.57397	3.65784
190.7	3.47595	2.6062	5.63049	4.98047	3.64563	4.69482	4.57886	3.6615
190.8	3.49426	2.56958	5.63049	4.97742	3.65417	4.68018	4.58557	3.64258
190.9	3.4729	2.58789	5.61218	4.98047	3.65051	4.67712	4.57458	3.65723
191	3.49426	2.58484	5.6366	4.98047	3.64746	4.6814	4.58252	3.65173
191.1	3.50342	2.58789	5.63354	4.98352	3.65295	4.69543	4.57764	3.64746
191.2	3.48816	2.59399	5.62134	4.98047	3.63892	4.68323	4.57397	3.64746
191.3	3.48816	2.58789	5.63354	4.97131	3.65417	4.69971	4.58252	3.65784
191.4	3.50037	2.59094	5.63049	4.98047	3.64624	4.68567	4.57275	3.65173
191.5	3.479	2.58179	5.63965	4.98352	3.65845	4.68628	4.58252	3.65112
191.6	3.50647	2.59705	5.61218	4.97437	3.65173	4.67163	4.57642	3.64807
191.7	3.47595	2.60315	5.6366	4.98352	3.66089	4.68445	4.57642	3.65479
191.8	3.46985	2.6001	5.62744	4.97437	3.65112	4.67407	4.59045	3.65112
191.9	3.50342	2.59094	5.6366	5.00793	3.6499	4.67896	4.58069	3.65417
192	3.50342	2.6062	5.6366	4.97437	3.6499	4.68201	4.57825	3.65417
192.1	3.48511	2.57874	5.60913	4.99878	3.6499	4.68872	4.57764	3.64502
192.2	3.50037	2.60315	5.63354	4.97742	3.65967	4.68628	4.57825	3.65173
192.3	3.50037	2.59705	5.62744	5.01099	3.65356	4.68689	4.58801	3.65784
192.4	3.49731	2.6062	5.63049	4.98962	3.65417	4.6875	4.58069	3.65051
192.5	3.4668	2.6062	5.64575	4.98962	3.65051	4.68506	4.58069	3.64685
192.6	3.48511	2.58789	5.61218	5.00183	3.6554	4.68933	4.5636	3.6438
192.7	3.50037	2.59094	5.63965	4.99268	3.66089	4.69116	4.57275	3.66699
192.8	3.479	2.59705	5.63049	5.00793	3.65845	4.67468	4.57214	3.64197
192.9	3.48511	2.59705	5.62744	4.99268	3.65479	4.68689	4.59106	3.64929
193	3.4729	2.6062	5.63354	4.99268	3.65906	4.68323	4.57642	3.63953
193.1	3.49426	2.61536	5.64575	5.00183	3.65356	4.68384	4.57581	3.6377
193.2	3.49121	2.58179	5.63354	4.99878	3.6554	4.68384	4.58069	3.6554
193.3	3.4729	2.57568	5.6427	4.98657	3.66272	4.67163	4.5813	3.64075
193.4	3.49121	2.59094	5.62744	5.00488	3.65723	4.68323	4.57153	3.64929
193.5	3.48816	2.59094	5.64575	4.98047	3.65662	4.67712	4.57031	3.65356
193.6	3.47595	2.60315	5.62744	4.99878	3.65967	4.67346	4.58191	3.64868
193.7	3.49731	2.59399	5.6427	4.99268	3.65479	4.67773	4.56848	3.64685
193.8	3.479	2.59705	5.61829	4.98657	3.65906	4.66553	4.57153	3.65051
193.9	3.46985	2.6001	5.63965	4.99573	3.66577	4.67896	4.5636	3.64258
194	3.48511	2.6062	5.63965	4.98962	3.66638	4.67407	4.56543	3.64502
194.1	3.48511	2.58484	5.64575	4.99573	3.65723	4.66919	4.56482	3.6377
194.2	3.479	2.60315	5.63965	4.98657	3.6731	4.67041	4.56482	3.65662
194.3	3.48206	2.58789	5.6427	4.99268	3.65784	4.67834	4.57764	3.64258
194.4	3.49121	2.59705	5.63965	4.99268	3.64929	4.66919	4.55688	3.66333
194.5	3.479	2.58484	5.6366	4.99573	3.65723	4.66858	4.57092	3.66638
194.6	3.49426	2.6123	5.6366	4.98352	3.6676	4.66125	4.56604	3.65295
194.7	3.49731	2.60315	5.67017	5.01099	3.66333	4.67407	4.56116	3.66394
194.8	3.49731	2.57568	5.6366	4.97131	3.65234	4.66614	4.56604	3.65845
194.9	3.4729	2.60925	5.65491	4.99573	3.66638	4.67407	4.56177	3.65112
195	3.49121	2.59399	5.64575	4.99573	3.6554	4.66797	4.56604	3.65723
195.1	3.48816	2.58789	5.6427	5.02014	3.66638	4.67224	4.56726	3.65173
195.2	3.48816	2.6001	5.63965	4.98657	3.64746	4.66064	4.56604	3.64624
195.3	3.50647	2.58179	5.63965	5.00183	3.65784	4.68567	4.57153	3.65234
195.4	3.47595	2.62451	5.6366	5.01404	3.67432	4.6637	4.55994	3.65601
195.5	3.47595	2.62146	5.62744	4.99573	3.6731	4.67163	4.57642	3.65723
195.6	3.50342	2.6062	5.6427	5.00183	3.65601	4.67896	4.57336	3.65479
195.7	3.48206	2.61536	5.66406	5.02014	3.65417	4.67102	4.57642	3.66394
195.8	3.48206	2.62146	5.6366	4.98962	3.66394	4.6637	4.55994	3.64807
195.9	3.50342	2.60315	5.62439	5.01404	3.65234	4.66614	4.57275	3.64868
196	3.479	2.63062	5.65491	4.98962	3.66577	4.65576	4.5636	3.65662
196.1	3.50647	2.59399	5.63965	5.00793	3.65356	4.6759	4.5575	3.65662
196.2	3.50037	2.6062	5.64575	4.99573	3.65417	4.65942	4.56604	3.64563
196.3	3.49121	2.61841	5.6366	5.00488	3.66028	4.67346	4.56177	3.6615
196.4	3.50342	2.62451	5.6488	5.00793	3.6499	4.66125	4.55688	3.6615
196.5	3.46375	2.64587	5.65186	4.98962	3.66821	4.66309	4.5575	3.65784
196.6	3.48206	2.60925	5.63965	4.99268	3.6676	4.66064	4.54651	3.66821
196.7	3.49121	2.62451	5.6427	5.00183	3.66455	4.67041	4.55383	3.65417
196.8	3.45764	2.59094	5.6488	4.99268	3.67126	4.66309	4.56726	3.65417
196.9	3.48816	2.62451	5.6427	4.99573	3.65723	4.67102	4.56421	3.66455
197	3.49731	2.6062	5.64575	5.00488	3.67004	4.64783	4.57214	3.64929
197.1	3.49426	2.60925	5.6427	5.00488	3.65479	4.66064	4.54224	3.65662
197.2	3.48511	2.63977	5.65491	4.98962	3.65417	4.65454	4.55933	3.66394
197.3	3.49121	2.60315	5.65491	4.99878	3.66516	4.66064	4.57825	3.66333
197.4	3.48511	2.62146	5.6427	4.99268	3.66272	4.66003	4.55994	3.65845
197.5	3.50342	2.62146	5.65491	5.00488	3.67188	4.65515	4.55688	3.67371
197.6	3.49121	2.6123	5.64575	4.98962	3.66394	4.66248	4.55322	3.66699
197.7	3.47595	2.62451	5.6427	5.00793	3.66028	4.66675	4.55688	3.65234
197.8	3.4729	2.61536	5.65186	4.99573	3.66699	4.66064	4.56848	3.67065
197.9	3.50342	2.6123	5.65796	5.00793	3.65662	4.66248	4.55688	3.66333
198	3.46985	2.60315	5.63354	4.99268	3.66882	4.66919	4.56177	3.65967
198.1	3.50342	2.62756	5.66711	5.00793	3.66577	4.66431	4.55994	3.67249
198.2	3.479	2.62451	5.64575	5.00183	3.66272	4.6759	4.57275	3.6731
198.3	3.48511	2.61536	5.6366	4.99878	3.65601	4.66003	4.5636	3.66455
198.4	3.48206	2.6062	5.63049	4.98962	3.66943	4.6637	4.55933	3.67004
198.5	3.48816	2.60315	5.65796	5.01099	3.67126	4.67224	4.55688	3.67188
198.6	3.50342	2.63062	5.63354	5.00183	3.66943	4.66858	4.55811	3.67371
198.7	3.49426	2.62451	5.6427	5.01404	3.66333	4.64172	4.5636	3.65784
198.8	3.479	2.60925	5.6427	4.99573	3.66211	4.66919	4.56787	3.65845
198.9	3.50037	2.60925	5.63965	5.02014	3.66089	4.66309	4.56787	3.6676
199	3.48816	2.62451	5.6366	4.99878	3.66943	4.66431	4.55383	3.65417
199.1	3.45459	2.6001	5.65491	4.99268	3.67188	4.66492	4.55933	3.6731
199.2	3.50037	2.61536	5.64575	5.00183	3.6676	4.67102	4.56543	3.66821
199.3	3.479	2.61536	5.65491	5.00183	3.67188	4.66553	4.5636	3.6731
199.4	3.50037	2.60925	5.65186	4.99268	3.66516	4.6759	4.5636	3.67676
199.5	3.48206	2.60925	5.65186	4.99268	3.67004	4.66675	4.56665	3.67126
199.6	3.49121	2.61536	5.67017	4.99878	3.66333	4.67834	4.55627	3.67981
[truncated: 104 more rows]
