# Supplementary material for: Blocking Kir6.2 channels with SpTx1 potentiates glucose-stimulated insulin secretion from murine pancreatic β cells and lowers blood glucose in diabetic mice
Source: eLife. 2022 Feb 25;11:e77026. doi: 10.7554/eLife.77026 (PMC8880991; doi:10.7554/eLife.77026)
Supplement: Figure 4—source data 1. [file elife-77026-fig4-data1.xlsx]

## Sheet: Figure 4
A	[SpTx1] in Molar	hKir6.2bgd		[SpTx1] in Molar	mKir6.2bgd		[SpTx1] in Molar	hKir6.2bgd+S103G+A107N+E108V
		I/I0	SEM		I/I0	SEM		I/I0	SEM
	1e-09	0.936	0.02063	1e-08	0.94925	0.01894	3e-08	0.88	0.0293
	3e-09	0.8698	0.02094	3e-08	0.88856	0.02049	1e-07	0.706	0.026
	1e-08	0.6272	0.02026	1e-07	0.75	0.02232	3e-07	0.51	0.031
	3e-08	0.4278	0.01974	3e-07	0.49478	0.04236	1e-06	0.272	0.0217
	1e-07	0.2154	0.02093	1e-06	0.3075	0.03842	3e-06	0.14	0.035
	3e-07	0.101	0.02634	3e-06	0.15196	0.02108
B	[SpTx1] in Molar	hKir6.2bgd+S103G+A107N		[SpTx1] in Molar	hKir6.2bgd+S103G+E108V		[SpTx1] in Molar	hKir6.2bgd+A107N+E108V
		I/I0	SEM		I/I0	SEM		I/I0	SEM
	1e-09	0.945	0.032	1e-08	0.937	0.024	1e-08	0.954	0.032
	3e-09	0.856	0.042	3e-08	0.876	0.032	3e-08	0.88	0.031
	1e-08	0.632	0.038	1e-07	0.732	0.023	1e-07	0.753	0.025
	3e-08	0.443	0.0267	3e-07	0.476	0.026	3e-07	0.49	0.023
	1e-07	0.23	0.022	1e-06	0.289	0.021	1e-06	0.299	0.016
	3e-07	0.12	0.021	3e-06	0.142	0.018	3e-06	0.174	0.021
C	[SpTx1] in Molar	hKir6.2bgd+S103G		[SpTx1] in Molar	hKir6.2bgd+A107N		[SpTx1] in Molar	hKir6.2bgd+E108V
		I/I0	SEM		I/I0	SEM		I/I0	SEM
	1e-09	0.925	0.032	1e-09	0.941	0.024	3e-08	0.86925	0.02721
	3e-09	0.8326	0.042	3e-09	0.886	0.032	1e-07	0.72425	0.02006
	1e-08	0.64332	0.038	1e-08	0.724	0.023	3e-07	0.4525	0.05309
	3e-08	0.45343	0.0267	3e-08	0.457	0.026	1e-06	0.24733	0.07433
	1e-07	0.2243	0.022	1e-07	0.269	0.021	3e-06	0.20425	0.04492
	3e-07	0.1252	0.021	3e-07	0.121	0.018
