# Supplementary material for: Blocking Kir6.2 channels with SpTx1 potentiates glucose-stimulated insulin secretion from murine pancreatic β cells and lowers blood glucose in diabetic mice
Source: eLife. 2022 Feb 25;11:e77026. doi: 10.7554/eLife.77026 (PMC8880991; doi:10.7554/eLife.77026)
Supplement: Figure 5—source data 1. [file elife-77026-fig5-data1.xlsx]

## Sheet: Figure 5
	A		B		C		D		E			F						G
position	mKir6.2bgd		mKir6.2bgd+G103S+N107A+V108E		mKir6.2bgd+V108E		mKir6.2V108E+mSUR1		hKir6.2E108V+hSUR1			[SpTx1]	mKir6.2bgd+V108E		mKir6.2bgd+G103S+N107A+V108E			[SpTx1]	mKir6.2V108E + mSUR1		[SpTx1]	hKir6.2E108V + hSUR1
	control	300nM SpTx1	control	10nM SpTx1	control	10nM SpTx1	control	10nM SpTx1	control	1uM SpTx1		Molar	I/I0	SEM	I/I0	SEM
0	0.19836	0.13733	0.13733	0.07019	-0.31433	-0.19226	0.16968	0.27527	0.23804	0.18982		1e-09	0.90975	0.03214	0.922	0.01625		Molar	I/I0	SEM	Molar	I/I0	SEM
0.1	0.20447	0.15564	0.14343	0.07019	-0.28687	-0.19226	0.16418	0.26733	0.25024	0.19043		3e-09	0.8026	0.02407	0.778	0.02988		1e-09	0.955	0.0122	3e-08	0.95475	0.01631
0.2	0.21973	0.18005	0.12512	0.07324	-0.29297	-0.1709	0.16907	0.29358	0.25269	0.19409		1e-08	0.4874	0.04794	0.4816	0.02548		3e-09	0.90212	0.01643	1e-07	0.86205	0.01365
0.3	0.24109	0.15869	0.14954	0.08545	-0.26245	-0.18005	0.16785	0.27039	0.24658	0.1947		3e-08	0.2908	0.04974	0.322	0.01453		1e-08	0.63742	0.03573	3e-07	0.6403	0.01454
0.4	0.21362	0.14954	0.16174	0.06714	-0.27771	-0.17395	0.177	0.27344	0.24536	0.18982		1e-07	0.1798	0.05187	0.199	0.01488		3e-08	0.4235	0.0333	1e-06	0.43073	0.02457
0.5	0.19836	0.15259	0.11902	0.07629	-0.28687	-0.16785	0.16846	0.28687	0.25024	0.20813		3e-07	0.13167	0.03234	0.1142	0.01567		1e-07	0.17667	0.01795	3e-06	0.2142	0.02345
0.6	0.25024	0.12512	0.14954	0.05798	-0.29602	-0.18311	0.15381	0.27649	0.26245	0.18555								3e-07	0.04363	0.00735	1e-05	0.08632	0.03241
0.7	0.20752	0.15259	0.13733	0.0824	-0.30212	-0.15259	0.17639	0.27527	0.2533	0.18188
0.8	0.21057	0.15869	0.15259	0.05798	-0.28076	-0.18616	0.16235	0.26794	0.24963	0.19104
0.9	0.19531	0.11902	0.14343	0.05493	-0.29602	-0.19836	0.16846	0.27405	0.24963	0.19714
1	0.24414	0.16479	0.15564	0.05188	-0.28076	-0.177	0.17029	0.28564	0.25024	0.18005
1.1	0.18921	0.10986	0.13428	0.07019	-0.32654	-0.18616	0.1593	0.271	0.24902	0.18982
1.2	0.21362	0.13733	0.14648	0.07019	-0.27466	-0.20447	0.16724	0.29663	0.23987	0.18433
1.3	0.20752	0.13123	0.13733	0.06104	-0.27466	-0.15564	0.16296	0.271	0.23865	0.18127
1.4	0.22583	0.16785	0.14343	0.07629	-0.27161	-0.18616	0.15564	0.28137	0.25391	0.18738
1.5	0.20752	0.14343	0.13733	0.05493	-0.28076	-0.19226	0.14709	0.29358	0.24536	0.1825
1.6	0.22888	0.12512	0.15564	0.07629	-0.29907	-0.18005	0.16663	0.26367	0.24902	0.18677
1.7	0.19226	0.13428	0.13733	0.05798	-0.28381	-0.18311	0.17151	0.27344	0.25452	0.17517
1.8	0.18921	0.12207	0.14954	0.05188	-0.28992	-0.18921	0.16907	0.29541	0.25452	0.20264
1.9	0.22278	0.13428	0.14648	0.07019	-0.29907	-0.16479	0.17029	0.28625	0.23621	0.17883
2	0.23193	0.14343	0.14648	0.05493	-0.28076	-0.20447	0.15503	0.28137	0.23804	0.18738
2.1	0.21973	0.12512	0.14343	0.07019	-0.30212	-0.177	0.16235	0.28198	0.25085	0.17395
2.2	0.23499	0.15259	0.15564	0.06104	-0.28687	-0.16479	0.1532	0.28625	0.25818	0.17944
2.3	0.21057	0.16174	0.14343	0.04883	-0.28381	-0.20752	0.16663	0.29236	0.25146	0.16541
2.4	0.22278	0.14648	0.14343	0.0885	-0.32349	-0.18616	0.16174	0.28564	0.2478	0.17578
2.5	0.20447	0.16174	0.14648	0.06104	-0.27161	-0.18921	0.16541	0.27832	0.23254	0.2063
2.6	0.21667	0.11597	0.14648	0.04883	-0.28992	-0.18616	0.16418	0.27466	0.24475	0.17944
2.7	0.24414	0.12207	0.15259	0.0885	-0.28687	-0.19226	0.16235	0.28259	0.24963	0.17517
2.8	0.20752	0.11902	0.15259	0.03967	-0.28992	-0.177	0.15381	0.28625	0.23804	0.19592
2.9	0.19836	0.16785	0.15564	0.07629	-0.29907	-0.18005	0.15137	0.28503	0.24414	0.18188
3	0.22278	0.14038	0.12512	0.04883	-0.29602	-0.20752	0.1416	0.28748	0.24902	0.18738
3.1	0.24414	0.14343	0.15564	0.07019	-0.27771	-0.19531	0.16663	0.2832	0.24536	0.17761
3.2	0.20752	0.13428	0.13733	0.06409	-0.29297	-0.15564	0.15869	0.28992	0.2356	0.18127
3.3	0.19531	0.18311	0.13428	0.06409	-0.29907	-0.18005	0.15137	0.28198	0.2478	0.17395
3.4	0.24109	0.12512	0.14343	0.05188	-0.29602	-0.20447	0.15808	0.28748	0.24658	0.17883
3.5	0.21667	0.13733	0.14038	0.06714	-0.28687	-0.1709	0.16785	0.2771	0.24841	0.18677
3.6	0.22583	0.10681	0.14648	0.05493	-0.30212	-0.19836	0.16113	0.28931	0.24963	0.17761
3.7	0.21362	0.13733	0.13428	0.07324	-0.29602	-0.17395	0.14771	0.27588	0.24048	0.18799
3.8	0.19226	0.15869	0.13428	0.04883	-0.30212	-0.16785	0.14587	0.28748	0.23193	0.16968
3.9	0.22888	0.12512	0.14343	0.07324	-0.28992	-0.18921	0.15686	0.28748	0.2417	0.18066
4	0.19226	0.13428	0.14648	0.06104	-0.30212	-0.18005	0.14648	0.27954	0.23376	0.18677
4.1	0.20447	0.13123	0.15259	0.06104	-0.29907	-0.19836	0.14893	0.29053	0.2417	0.18311
4.2	0.22278	0.14954	0.14648	0.06104	-0.28381	-0.16479	0.15686	0.29846	0.24841	0.16724
4.3	0.22278	0.12817	0.13733	0.05798	-0.29907	-0.18616	0.15442	0.28687	0.24109	0.17273
4.4	0.21057	0.16174	0.14038	0.05188	-0.2594	-0.1709	0.15137	0.28564	0.23743	0.17151
4.5	0.21667	0.12817	0.12817	0.07935	-0.28381	-0.20142	0.15442	0.28992	0.23254	0.17456
4.6	0.19836	0.10986	0.14038	0.06714	-0.30518	-0.18311	0.1593	0.27954	0.24414	0.16907
4.7	0.21973	0.1709	0.13733	0.05798	-0.28687	-0.18311	0.15198	0.31311	0.23865	0.17212
4.8	0.22583	0.15564	0.14343	0.0824	-0.28076	-0.18921	0.15747	0.27832	0.24292	0.18372
4.9	0.21362	0.12817	0.14038	0.05188	-0.27771	-0.18921	0.1593	0.29236	0.25391	0.16418
5	0.21362	0.13733	0.12512	0.06409	-0.28076	-0.18311	0.15442	0.29358	0.23926	0.18494
5.1	0.22583	0.15259	0.14648	0.05493	-0.30518	-0.19226	0.15015	0.29663	0.23743	0.17029
5.2	0.21667	0.13428	0.12207	0.06714	-0.29602	-0.18311	0.16052	0.29663	0.23499	0.17517
5.3	0.17395	0.12817	0.13733	0.07935	-0.28992	-0.18311	0.14954	0.28503	0.23804	0.18005
5.4	0.24414	0.15564	0.15259	0.05798	-0.28687	-0.18311	0.15991	0.30396	0.24475	0.18677
5.5	0.21362	0.12817	0.13733	0.07629	-0.28076	-0.18311	0.13855	0.2948	0.22278	0.16479
5.6	0.20142	0.14343	0.13428	0.07629	-0.29907	-0.19226	0.14282	0.29419	0.23254	0.16418
5.7	0.21973	0.12817	0.12512	0.0885	-0.30823	-0.21057	0.16174	0.28931	0.23254	0.19104
5.8	0.23193	0.12817	0.14954	0.06409	-0.27771	-0.1709	0.14893	0.29663	0.2124	0.16357
5.9	0.21973	0.15259	0.12512	0.05798	-0.29602	-0.18005	0.15869	0.28442	0.24414	0.17578
6	0.21362	0.12817	0.11597	0.07019	-0.28992	-0.18311	0.15381	0.29541	0.22766	0.17395
6.1	0.22278	0.13428	0.11902	0.04883	-0.29297	-0.17395	0.15137	0.28442	0.22339	0.16663
6.2	0.19226	0.17395	0.12817	0.07324	-0.30518	-0.177	0.15686	0.30151	0.23254	0.17578
6.3	0.21667	0.14648	0.12512	0.07019	-0.27161	-0.17395	0.1532	0.28625	0.23804	0.16296
6.4	0.24109	0.12207	0.13428	0.05188	-0.30518	-0.18311	0.15686	0.30701	0.22888	0.16174
6.5	0.19226	0.14343	0.13733	0.05188	-0.28687	-0.18921	0.15442	0.2832	0.23376	0.18616
6.6	0.21667	0.12817	0.11902	0.07629	-0.27771	-0.19531	0.1532	0.29846	0.24841	0.16846
6.7	0.25635	0.13733	0.12512	0.05798	-0.29297	-0.177	0.13855	0.29968	0.22583	0.17212
6.8	0.19836	0.14954	0.11902	0.06714	-0.29297	-0.15564	0.1532	0.28687	0.23621	0.17029
6.9	0.23804	0.12207	0.12512	0.07324	-0.27466	-0.18005	0.13428	0.29175	0.23376	0.16724
7	0.20752	0.11292	0.12512	0.07324	-0.31128	-0.20142	0.14648	0.29419	0.23193	0.16296
7.1	0.22888	0.14648	0.12817	0.06714	-0.30518	-0.16479	0.14038	0.27466	0.23621	0.16357
7.2	0.21362	0.13428	0.13428	0.07629	-0.28687	-0.20752	0.14343	0.30884	0.23743	0.17273
7.3	0.20142	0.14648	0.13123	0.05188	-0.28687	-0.1709	0.14648	0.27344	0.22217	0.15442
7.4	0.20142	0.14343	0.13428	0.07019	-0.28992	-0.19531	0.15137	0.30212	0.21912	0.16785
7.5	0.23804	0.13123	0.10986	0.04272	-0.27161	-0.177	0.15686	0.3009	0.24719	0.15991
7.6	0.21057	0.14038	0.10986	0.06104	-0.29907	-0.17395	0.14587	0.28503	0.21729	0.17029
7.7	0.22888	0.13428	0.11597	0.06714	-0.30823	-0.19226	0.14526	0.28687	0.23071	0.16052
7.8	0.23193	0.13428	0.10376	0.06409	-0.28687	-0.19226	0.14343	0.28992	0.23132	0.16846
7.9	0.18616	0.14954	0.11902	0.04578	-0.29907	-0.21362	0.14343	0.28198	0.23499	0.16785
8	0.21057	0.13428	0.09155	0.07324	-0.30823	-0.16174	0.1355	0.30029	0.23743	0.16663
8.1	0.20142	0.14038	0.09766	0.05493	-0.28992	-0.18921	0.14648	0.2887	0.22522	0.16479
8.2	0.21362	0.15259	0.12207	0.06409	-0.25635	-0.19531	0.14221	0.28625	0.23376	0.16724
8.3	0.19531	0.13428	0.10071	0.05798	-0.29297	-0.18005	0.15015	0.28259	0.22339	0.16846
8.4	0.24109	0.14038	0.09766	0.07019	-0.28992	-0.21057	0.16846	0.28198	0.22522	0.16479
8.5	0.20142	0.15564	0.10071	0.06409	-0.29907	-0.177	0.13733	0.27771	0.24109	0.17273
8.6	0.24109	0.14038	0.11597	0.07019	-0.32043	-0.16479	0.14587	0.27649	0.23682	0.15808
8.7	0.23499	0.11292	0.10986	0.06409	-0.28076	-0.19226	0.15564	0.28748	0.22522	0.16418
8.8	0.22888	0.14343	0.11292	0.05798	-0.31433	-0.177	0.14465	0.28381	0.21362	0.16357
8.9	0.18005	0.14343	0.08545	0.07935	-0.29297	-0.20142	0.15076	0.28748	0.22461	0.16907
9	0.22583	0.13733	0.11902	0.05188	-0.29907	-0.16785	0.15076	0.29602	0.22339	0.1709
9.1	0.16174	0.14954	0.10986	0.06104	-0.27466	-0.18921	0.15259	0.29541	0.23804	0.1709
9.2	0.21973	0.12817	0.09155	0.07935	-0.29602	-0.18616	0.15076	0.28381	0.22766	0.17151
9.3	0.21973	0.14343	0.09155	0.03967	-0.30518	-0.18311	0.14832	0.271	0.24109	0.16602
9.4	0.20447	0.10986	0.07935	0.07324	-0.30823	-0.18921	0.13184	0.2832	0.22095	0.16357
9.5	0.23804	0.14648	0.10986	0.04578	-0.28992	-0.18311	0.14038	0.28748	0.23682	0.16846
9.6	0.21973	0.13123	0.10376	0.07019	-0.31128	-0.19226	0.16113	0.28931	0.23682	0.17578
9.7	0.20752	0.14038	0.11292	0.05798	-0.28076	-0.18005	0.14526	0.28137	0.22034	0.17334
9.8	0.21973	0.11902	0.10681	0.0824	-0.28992	-0.18311	0.14954	0.28748	0.22766	0.16907
9.9	0.21362	0.18005	0.09766	0.05188	-0.28076	-0.18311	0.13794	0.28015	0.2356	0.15747
10	0.21362	0.12512	0.0946	0.05188	-0.29602	-0.18311	0.14709	0.28198	0.23254	0.17456
10.1	0.22278	0.10376	0.10071	0.06104	-0.29907	-0.18616	0.14648	0.28076	0.224	0.16235
10.2	0.20752	0.16174	0.0946	0.08545	-0.30212	-0.19836	0.14893	0.28748	0.23132	0.17212
10.3	0.19226	0.14648	0.10071	0.06104	-0.29907	-0.20142	0.14709	0.26001	0.22339	0.16357
10.4	0.23193	0.10986	0.10071	0.07019	-0.29297	-0.19226	0.14954	0.2887	0.22949	0.17395
10.5	0.19836	0.15259	0.0885	0.07019	-0.28076	-0.18005	0.14648	0.27466	0.24109	0.16541
10.6	0.19836	0.17395	0.0885	0.04883	-0.30518	-0.17395	0.14709	0.28137	0.22217	0.17273
10.7	0.19226	0.10681	0.0824	0.07019	-0.28076	-0.16785	0.14832	0.28259	0.23376	0.16663
10.8	0.22278	0.15259	0.0946	0.06714	-0.30518	-0.16785	0.14587	0.27405	0.23743	0.17761
10.9	0.18616	0.13428	0.10681	0.06714	-0.30823	-0.19226	0.15625	0.28015	0.23743	0.17639
11	0.19531	0.13123	0.08545	0.06104	-0.28076	-0.18311	0.13916	0.28198	0.22644	0.16235
11.1	0.22583	0.15564	0.0885	0.07324	-0.29907	-0.18311	0.14832	0.27893	0.22583	0.17334
11.2	0.21667	0.14648	0.10681	0.06409	-0.30212	-0.18311	0.14893	0.28809	0.2301	0.17029
11.3	0.21362	0.13428	0.10071	0.06714	-0.27466	-0.177	0.14771	0.2832	0.24048	0.17334
11.4	0.24109	0.14648	0.09155	0.06409	-0.30212	-0.177	0.14404	0.28137	0.23071	0.17883
11.5	0.1709	0.13123	0.0885	0.07324	-0.2594	-0.1709	0.15686	0.27161	0.24048	0.17273
11.6	0.20752	0.14954	0.11292	0.07935	-0.28381	-0.20752	0.13489	0.27466	0.2356	0.16785
11.7	0.21667	0.13428	0.07935	0.05798	-0.27771	-0.18311	0.16846	0.2887	0.24109	0.17944
11.8	0.22583	0.12512	0.10071	0.07019	-0.29297	-0.20142	0.15381	0.28503	0.22766	0.16296
11.9	0.20142	0.15869	0.10376	0.07629	-0.2655	-0.19226	0.16357	0.27954	0.22827	0.17212
12	0.19531	0.09766	0.0885	0.06714	-0.30212	-0.17395	0.15259	0.26489	0.23193	0.15015
12.1	0.23193	0.18005	0.10681	0.06104	-0.27466	-0.1709	0.15076	0.26184	0.23376	0.18005
12.2	0.16174	0.13428	0.10376	0.05798	-0.26855	-0.177	0.15991	0.27344	0.23621	0.17761
12.3	0.21667	0.16785	0.10071	0.07019	-0.30518	-0.20142	0.15076	0.27466	0.22461	0.1825
12.4	0.21973	0.13428	0.07629	0.06714	-0.29602	-0.18005	0.15808	0.28748	0.2417	0.17578
12.5	0.20752	0.14038	0.10071	0.07935	-0.27771	-0.16479	0.14832	0.26978	0.23743	0.18311
12.6	0.23193	0.15564	0.10681	0.05798	-0.29297	-0.20447	0.16602	0.29114	0.22949	0.17456
12.7	0.18616	0.13123	0.08545	0.07019	-0.28687	-0.19226	0.16052	0.25513	0.23682	0.17395
12.8	0.21057	0.13123	0.10681	0.07324	-0.28076	-0.17395	0.15747	0.27222	0.23987	0.17517
12.9	0.19226	0.14038	0.11292	0.07629	-0.30518	-0.18921	0.1593	0.26306	0.24414	0.18921
13	0.21667	0.12512	0.0946	0.07019	-0.29602	-0.19836	0.16357	0.28564	0.23499	0.16296
13.1	0.21362	0.12512	0.09766	0.06714	-0.28992	-0.18616	0.16541	0.2655	0.23438	0.18799
13.2	0.19836	0.13428	0.10986	0.07935	-0.26855	-0.1709	0.1416	0.28137	0.24353	0.18555
13.3	0.19836	0.11597	0.10071	0.06104	-0.30518	-0.16174	0.16418	0.26367	0.23682	0.18433
13.4	0.23499	0.13428	0.10071	0.05798	-0.27771	-0.19226	0.16174	0.271	0.24353	0.1886
13.5	0.21057	0.1709	0.10681	0.05798	-0.29602	-0.19531	0.15137	0.27649	0.22644	0.18494
13.6	-25.4913	-25.0855	-14.0869	-14.0503	-11.5814	-11.2183	-7.40662	-7.20398	-6.59607	-6.55457
13.7	-43.454	-43.9239	-37.0392	-36.6821	-47.0825	-46.6553	-20	-20	-20	-20
13.8	-26.5564	-25.9888	-28.9185	-27.4567	-36.9263	-35.4004	-20	-20	-20	-20
13.9	-17.2607	-16.2201	-22.7051	-20.2118	-21.5424	-18.2556	-20	-20	-20	-20
14	-11.8591	-10.4187	-19.0033	-15.8569	-17.6148	-13.0432	-19.4928	-20	-20	-18.653
14.1	-8.80432	-7.25403	-16.7206	-13.1714	-17.1387	-12.0575	-16.8762	-20	-20	-16.2543
14.2	-7.09839	-5.47791	-15.2924	-11.4777	-16.4337	-11.1969	-14.9414	-18.9496	-18.4747	-14.3927
14.3	-6.18591	-4.49219	-14.386	-10.3302	-15.6952	-10.2508	-13.4528	-17.8577	-17.3627	-12.9748
14.4	-5.66711	-3.93066	-13.7756	-9.53979	-15.2832	-9.67712	-12.2839	-17.0477	-16.4575	-11.8591
14.5	-5.34973	-3.61633	-13.3301	-9.01794	-15.0879	-9.38416	-11.3751	-16.4062	-15.824	-10.9723
14.6	-5.20325	-3.46985	-13.0554	-8.63953	-14.9963	-9.20715	-10.6775	-15.9345	-15.3149	-10.2643
14.7	-5.07202	-3.35693	-12.8845	-8.35876	-14.9414	-9.10339	-10.0952	-15.5927	-14.9432	-9.70276
14.8	-5.01099	-3.28674	-12.7594	-8.14819	-14.9078	-9.02405	-9.65027	-15.3033	-14.632	-9.25049
14.9	-5.00488	-3.2196	-12.6495	-8.03528	-14.9139	-8.95691	-9.29443	-15.0891	-14.436	-8.87939
15	-4.99573	-3.18298	-12.6221	-7.91321	-14.9445	-8.92639	-9.02161	-14.956	-14.2627	-8.59009
15.1	-4.98352	-3.21045	-12.558	-7.83997	-14.9689	-8.93555	-8.82446	-14.8291	-14.14	-8.3551
15.2	-4.98352	-3.20129	-12.5519	-7.80334	-15.0146	-8.9386	-8.65295	-14.7534	-14.054	-8.17322
15.3	-5.02625	-3.17383	-12.5793	-7.75757	-14.9994	-8.96912	-8.51685	-14.693	-13.9966	-8.0249
15.4	-4.97437	-3.20435	-12.5488	-7.73621	-15.0391	-8.95691	-8.42163	-14.6735	-13.9618	-7.90527
15.5	-5.00793	-3.17078	-12.5732	-7.74536	-15.1123	-8.99048	-8.33679	-14.635	-13.9142	-7.79541
15.6	-5.02319	-3.19824	-12.619	-7.73621	-15.1459	-8.98743	-8.28613	-14.6399	-13.9209	-7.74902
15.7	-5.00488	-3.19214	-12.6221	-7.7301	-15.1886	-9.00574	-8.24829	-14.6356	-13.9093	-7.69958
15.8	-5.0354	-3.16467	-12.6495	-7.75452	-15.2008	-9.021	-8.21289	-14.6381	-13.9117	-7.65198
15.9	-5.02625	-3.17688	-12.6862	-7.75757	-15.2466	-9.05762	-8.17749	-14.657	-13.9172	-7.62024
16	-5.06287	-3.17383	-12.6923	-7.79114	-15.2832	-9.04846	-8.18237	-14.6875	-13.9307	-7.60315
16.1	-5.05676	-3.17078	-12.7258	-7.77588	-15.332	-9.10645	-8.172	-14.6838	-13.9587	-7.60803
16.2	-5.06897	-3.20435	-12.7838	-7.78198	-15.3687	-9.1156	-8.16711	-14.715	-13.963	-7.58789
16.3	-5.08423	-3.17383	-12.7869	-7.8125	-15.39	-9.12781	-8.1781	-14.7259	-14.0002	-7.57996
16.4	-5.05371	-3.20129	-12.8265	-7.82776	-15.4419	-9.14001	-8.18726	-14.765	-14.0021	-7.57629
16.5	-5.08728	-3.16162	-12.8479	-7.85828	-15.4633	-9.16138	-8.2019	-14.7668	-14.0326	-7.58362
16.6	-5.11169	-3.18909	-12.8906	-7.86743	-15.509	-9.17358	-8.2135	-14.779	-14.0643	-7.5885
16.7	-5.10864	-3.19824	-12.9364	-7.89795	-15.5396	-9.20105	-8.22083	-14.8523	-14.0655	-7.60925
16.8	-5.1239	-3.19214	-12.9517	-7.91321	-15.5792	-9.198	-8.2312	-14.8657	-14.1095	-7.62085
16.9	-5.09949	-3.18604	-12.9822	-7.92542	-15.5975	-9.25293	-8.24463	-14.8871	-14.1376	-7.62268
17	-5.14526	-3.14331	-13.0158	-7.94678	-15.6525	-9.24988	-8.27515	-14.9085	-14.1492	-7.63184
17.1	-5.13	-3.20129	-13.0371	-7.96814	-15.6677	-9.26208	-8.26294	-14.9182	-14.1705	-7.64648
17.2	-5.16052	-3.18604	-13.0646	-7.98645	-15.6708	-9.25903	-8.30078	-14.9426	-14.195	-7.65869
17.3	-5.1239	-3.17993	-13.0859	-7.99255	-15.7288	-9.30176	-8.32214	-14.9707	-14.2035	-7.66785
17.4	-5.15747	-3.19824	-13.1226	-8.03223	-15.7471	-9.28955	-8.31726	-15.0128	-14.2377	-7.69104
17.5	-5.15442	-3.15247	-13.1317	-8.04443	-15.7989	-9.31396	-8.3429	-15.0073	-14.2432	-7.69409
17.6	-5.16052	-3.16162	-13.15	-8.03833	-15.8173	-9.33838	-8.33191	-15.0348	-14.2853	-7.724
17.7	-5.2002	-3.18604	-13.208	-8.078	-15.86	-9.35974	-8.35999	-15.0519	-14.2908	-7.71667
17.8	-5.16052	-3.18909	-13.2263	-8.09021	-15.8691	-9.39026	-8.38501	-15.0757	-14.3079	-7.73376
17.9	-5.19104	-3.14941	-13.2538	-8.09021	-15.8844	-9.37805	-8.38745	-15.0873	-14.3256	-7.75269
18	-5.19714	-3.16162	-13.2416	-8.09631	-15.9424	-9.37805	-8.41736	-15.1306	-14.342	-7.76428
18.1	-5.17273	-3.15857	-13.2965	-8.11768	-15.9607	-9.37805	-8.4198	-15.1495	-14.3817	-7.77588
18.2	-5.23071	-3.21045	-13.3179	-8.13599	-15.9607	-9.43604	-8.4198	-15.1471	-14.3903	-7.7832
18.3	-5.17883	-3.18909	-13.327	-8.13904	-15.9973	-9.42688	-8.44727	-15.1776	-14.3982	-7.79602
18.4	-5.23987	-3.16772	-13.3423	-8.15735	-16.0126	-9.4574	-8.46497	-15.1807	-14.4263	-7.81616
18.5	-5.22766	-3.17383	-13.3697	-8.17871	-16.0309	-9.45435	-8.48083	-15.2051	-14.4342	-7.82227
18.6	-5.21545	-3.17078	-13.4064	-8.17566	-16.0858	-9.44214	-8.47839	-15.224	-14.4623	-7.83386
18.7	-5.25513	-3.17993	-13.4094	-8.19092	-16.1041	-9.47876	-8.50342	-15.2344	-14.4665	-7.83752
18.8	-5.22766	-3.18298	-13.4186	-8.21533	-16.1133	-9.49707	-8.50708	-15.235	-14.4849	-7.86133
18.9	-5.23682	-3.17688	-13.4552	-8.23364	-16.1346	-9.52148	-8.51257	-15.2795	-14.5117	-7.86072
19	-5.23987	-3.16162	-13.4735	-8.255	-16.1713	-9.50623	-8.53455	-15.2753	-14.5148	-7.86804
19.1	-5.27039	-3.17993	-13.4888	-8.24585	-16.2018	-9.53674	-8.54187	-15.2881	-14.5367	-7.89124
19.2	-5.22461	-3.14026	-13.504	-8.27026	-16.1896	-9.53674	-8.53882	-15.3046	-14.5514	-7.90161
19.3	-5.26123	-3.15552	-13.5193	-8.26111	-16.2384	-9.53979	-8.55347	-15.3235	-14.5459	-7.8949
19.4	-5.28259	-3.15857	-13.5467	-8.30994	-16.2628	-9.55505	-8.58032	-15.3149	-14.574	-7.91016
19.5	-5.27649	-3.17078	-13.5651	-8.28552	-16.2476	-9.57642	-8.59802	-15.3412	-14.5831	-7.92603
19.6	-5.23376	-3.16772	-13.5956	-8.30688	-16.2781	-9.55811	-8.58521	-15.3387	-14.5807	-7.9248
19.7	-5.28259	-3.16467	-13.6017	-8.31909	-16.3391	-9.58252	-8.59802	-15.3693	-14.6173	-7.92236
19.8	-5.27649	-3.15552	-13.5956	-8.3252	-16.3239	-9.60388	-8.60596	-15.3729	-14.6179	-7.94495
19.9	-5.30396	-3.15857	-13.6536	-8.34656	-16.3788	-9.58557	-8.62122	-15.3961	-14.6411	-7.94556
20	-5.3009	-3.15857	-13.6658	-8.34961	-16.3544	-9.61609	-8.60596	-15.3998	-14.6448	-7.96326
20.1	-5.29785	-3.14636	-13.6841	-8.35266	-16.3788	-9.61304	-8.63098	-15.4053	-14.6527	-7.96387
20.2	-5.29785	-3.18298	-13.7024	-8.35876	-16.452	-9.63135	-8.65662	-15.4279	-14.6558	-7.97913
20.3	-5.2948	-3.16467	-13.7207	-8.37097	-16.4459	-9.65576	-8.6499	-15.4242	-14.6649	-7.96936
20.4	-5.3009	-3.16467	-13.7299	-8.39539	-16.4459	-9.66797	-8.6615	-15.4553	-14.693	-8.00964
20.5	-5.32227	-3.14636	-13.7512	-8.38013	-16.4734	-9.64661	-8.67126	-15.4614	-14.7003	-7.98523
20.6	-5.31311	-3.15857	-13.7543	-8.38928	-16.5161	-9.66492	-8.67859	-15.4645	-14.7125	-8.00659
20.7	-5.31921	-3.14636	-13.7756	-8.40149	-16.51	-9.68018	-8.6908	-15.4712	-14.7223	-8.01086
20.8	-5.36804	-3.13416	-13.7756	-8.4137	-16.51	-9.68933	-8.69568	-15.484	-14.743	-8.02551
20.9	-5.28259	-3.14941	-13.8123	-8.4137	-16.5405	-9.68628	-8.68835	-15.4889	-14.7406	-8.03345
21	-5.33447	-3.12805	-13.8336	-8.4198	-16.5619	-9.70764	-8.70056	-15.5188	-14.7449	-8.02734
21.1	-5.34058	-3.15552	-13.8519	-8.43506	-16.568	-9.7229	-8.69812	-15.5139	-14.7693	-8.04993
21.2	-5.32532	-3.12805	-13.8428	-8.45032	-16.6016	-9.71069	-8.70239	-15.5353	-14.7656	-8.04077
21.3	-5.33752	-3.17993	-13.8763	-8.47168	-16.626	-9.729	-8.72253	-15.5102	-14.787	-8.04382
21.4	-5.33142	-3.13721	-13.8855	-8.44727	-16.6351	-9.729	-8.73047	-15.5487	-14.7919	-8.04871
21.5	-5.32532	-3.13721	-13.8947	-8.48083	-16.6443	-9.72595	-8.7207	-15.5444	-14.7852	-8.06763
21.6	-5.3772	-3.15247	-13.9008	-8.46558	-16.6443	-9.74426	-8.73718	-15.5518	-14.8138	-8.0542
21.7	-5.37415	-3.14636	-13.9252	-8.48083	-16.6656	-9.76868	-8.74939	-15.5658	-14.8114	-8.07068
21.8	-5.33142	-3.13416	-13.9221	-8.48694	-16.6748	-9.75037	-8.74023	-15.5664	-14.8187	-8.07617
21.9	-5.34058	-3.15247	-13.9374	-8.47778	-16.7023	-9.76257	-8.75549	-15.5572	-14.8175	-8.09265
22	-5.39856	-3.10059	-13.9648	-8.51746	-16.7084	-9.77478	-8.74084	-15.5841	-14.8303	-8.07983
22.1	-5.34058	-3.1311	-13.9771	-8.5083	-16.7389	-9.78088	-8.75366	-15.5853	-14.834	-8.08289
22.2	-5.3894	-3.13416	-13.9893	-8.53271	-16.748	-9.76257	-8.75977	-15.5945	-14.8553	-8.10425
22.3	-5.37109	-3.125	-13.9954	-8.52051	-16.7694	-9.78699	-8.77625	-15.6049	-14.8566	-8.09631
22.4	-5.39551	-3.11279	-14.0167	-8.53271	-16.7511	-9.82056	-8.76526	-15.6097	-14.8602	-8.10852
22.5	-5.35889	-3.13721	-14.0167	-8.53271	-16.7694	-9.76868	-8.77747	-15.614	-14.8669	-8.09631
22.6	-5.3772	-3.09753	-14.0411	-8.55408	-16.8121	-9.80225	-8.7915	-15.6378	-14.8675	-8.10669
22.7	-5.3772	-3.13416	-14.0411	-8.54492	-16.8213	-9.79309	-8.79639	-15.6464	-14.8804	-8.12683
22.8	-5.42297	-3.1189	-14.0717	-8.57239	-16.8121	-9.8175	-8.77991	-15.6311	-14.881	-8.12256
22.9	-5.36194	-3.13721	-14.0564	-8.56628	-16.8274	-9.83276	-8.80005	-15.6506	-14.8798	-8.13477
23	-5.40466	-3.11279	-14.0961	-8.56628	-16.8732	-9.82666	-8.79944	-15.6464	-14.8987	-8.13782
23.1	-5.41382	-3.12805	-14.09	-8.58154	-16.8579	-9.83276	-8.80554	-15.6543	-14.8993	-8.13965
23.2	-5.40771	-3.12805	-14.1266	-8.5968	-16.8579	-9.84802	-8.79395	-15.6567	-14.9097	-8.13049
23.3	-5.42603	-3.10364	-14.1235	-8.5907	-16.9037	-9.86328	-8.80432	-15.6653	-14.928	-8.13843
23.4	-5.41382	-3.09448	-14.1327	-8.57544	-16.9037	-9.83887	-8.81042	-15.6934	-14.9097	-8.14697
23.5	-5.3894	-3.09753	-14.1296	-8.58459	-16.922	-9.87244	-8.82935	-15.6909	-14.9335	-8.13049
23.6	-5.41077	-3.14026	-14.154	-8.60596	-16.9067	-9.86633	-8.82019	-15.7007	-14.9164	-8.15125
23.7	-5.40466	-3.10364	-14.1571	-8.61816	-16.9617	-9.89075	-8.81836	-15.7001	-14.9426	-8.14514
23.8	-5.41077	-3.10669	-14.1815	-8.60901	-16.9525	-9.87244	-8.82813	-15.7153	-14.9542	-8.15002
23.9	-5.43213	-3.11584	-14.154	-8.62732	-16.9556	-9.88159	-8.83789	-15.7056	-14.9359	-8.16345
24	-5.45044	-3.10059	-14.1846	-8.62122	-16.9678	-9.88464	-8.82507	-15.7159	-14.9548	-8.1543
24.1	-5.40466	-3.10669	-14.2059	-8.62732	-16.98	-9.8999	-8.85071	-15.7165	-14.9609	-8.15247
24.2	-5.43213	-3.11584	-14.2181	-8.60901	-16.9891	-9.88464	-8.84277	-15.7306	-14.9695	-8.16772
24.3	-5.43518	-3.11279	-14.2517	-8.64258	-17.0105	-9.90601	-8.83118	-15.7312	-14.9725	-8.15857
24.4	-5.39246	-3.06702	-14.212	-8.61206	-17.0166	-9.8938	-8.84338	-15.7227	-14.9829	-8.16528
24.5	-5.45349	-3.10059	-14.2487	-8.66089	-17.0563	-9.93347	-8.8562	-15.7477	-14.9847	-8.17261
24.6	-5.41687	-3.10059	-14.2761	-8.64868	-17.0196	-9.91821	-8.85376	-15.7385	-14.9994	-8.16895
24.7	-5.42297	-3.07617	-14.2425	-8.63953	-17.0715	-9.91211	-8.85071	-15.7477	-14.9847	-8.17383
24.8	-5.42908	-3.09753	-14.3005	-8.65173	-17.0593	-9.91821	-8.85864	-15.7465	-14.9902	-8.18237
24.9	-5.45959	-3.08533	-14.2731	-8.66394	-17.0624	-9.90295	-8.85437	-15.7593	-14.9945	-8.18359
25	-5.44739	-3.08838	-14.3005	-8.65479	-17.0715	-9.93652	-8.85315	-15.7758	-15.0067	-8.17627
25.1	-5.43518	-3.11279	-14.3097	-8.66089	-17.1112	-9.92126	-8.8739	-15.7684	-15.0055	-8.18604
25.2	-5.45044	-3.09448	-14.3066	-8.6792	-17.0929	-9.93958	-8.86108	-15.7556	-15.0073	-8.17078
25.3	-5.44739	-3.09143	-14.3005	-8.6853	-17.1112	-9.94263	-8.86536	-15.7575	-14.9988	-8.19824
25.4	-5.44128	-3.07617	-14.3249	-8.66089	-17.1265	-9.92737	-8.84644	-15.7788	-15.0183	-8.18054
25.5	-5.44128	-3.06702	-14.3066	-8.66394	-17.1204	-9.95178	-8.87878	-15.766	-15.0269	-8.20007
25.6	-5.47791	-3.09753	-14.3433	-8.70056	-17.1387	-9.94873	-8.86536	-15.78	-15.0421	-8.18665
25.7	-5.44128	-3.09753	-14.3372	-8.66089	-17.1539	-9.95178	-8.88	-15.7837	-15.0085	-8.19153
25.8	-5.46265	-3.08228	-14.3433	-8.69141	-17.1692	-9.95483	-8.87939	-15.7904	-15.0372	-8.19763
25.9	-5.43823	-3.07922	-14.3494	-8.6792	-17.157	-9.97314	-8.88428	-15.7867	-15.0409	-8.19641
26	-5.44434	-3.07007	-14.3738	-8.69141	-17.1814	-9.96399	-8.87878	-15.7861	-15.0207	-8.20496
26.1	-5.47485	-3.06396	-14.3677	-8.70972	-17.1661	-9.96704	-8.88367	-15.8264	-15.0348	-8.19824
26.2	-5.46265	-3.07922	-14.4043	-8.69141	-17.2028	-9.97925	-8.88123	-15.7861	-15.0384	-8.20862
26.3	-5.45349	-3.07617	-14.3677	-8.72192	-17.2058	-9.95789	-8.87756	-15.8227	-15.0397	-8.20801
26.4	-5.47485	-3.09143	-14.4012	-8.71887	-17.1997	-9.9884	-8.88428	-15.805	-15.0549	-8.20923
26.5	-5.44128	-3.07007	-14.4012	-8.71582	-17.2424	-9.99451	-8.86963	-15.813	-15.0446	-8.21045
26.6	-5.47485	-3.05176	-14.4104	-8.71277	-17.2363	-9.9762	-8.9032	-15.8221	-15.0494	-8.21228
26.7	-5.49316	-3.0365	-14.4043	-8.71277	-17.2455	-9.98535	-8.86597	-15.8105	-15.0494	-8.20496
26.8	-5.45044	-3.07007	-14.4165	-8.71887	-17.2363	-10.0006	-8.8916	-15.816	-15.0824	-8.21228
26.9	-5.49011	-3.04565	-14.4409	-8.74023	-17.2424	-9.99146	-8.88245	-15.8215	-15.061	-8.21594
27	-5.48096	-3.04565	-14.4165	-8.74023	-17.2699	-10.0067	-8.88184	-15.8252	-15.058	-8.20862
27.1	-5.48706	-3.06091	-14.4318	-8.72803	-17.2882	-9.98535	-8.89771	-15.8521	-15.0537	-8.21899
27.2	-5.48096	-3.05176	-14.447	-8.74939	-17.2699	-10.0189	-8.90747	-15.8356	-15.0665	-8.20984
27.3	-5.46265	-3.08228	-14.4562	-8.74023	-17.2791	-10.0067	-8.90015	-15.8344	-15.0836	-8.22449
27.4	-5.49927	-3.06702	-14.4653	-8.73413	-17.276	-10.0128	-8.91541	-15.8301	-15.072	-8.20679
27.5	-5.46265	-3.04871	-14.4562	-8.72803	-17.3401	-10.0159	-8.90747	-15.8533	-15.0781	-8.22571
27.6	-5.48706	-3.07617	-14.4775	-8.74329	-17.3065	-10.025	-8.89343	-15.8685	-15.0891	-8.22144
27.7	-5.48096	-3.05481	-14.4684	-8.73718	-17.3126	-10.0098	-8.89709	-15.8405	-15.0653	-8.22144
27.8	-5.4657	-3.0304	-14.4806	-8.72803	-17.3554	-10.0067	-8.88428	-15.8533	-15.0873	-8.21472
27.9	-5.48706	-3.06702	-14.4653	-8.74329	-17.3462	-10.0311	-8.90442	-15.8594	-15.094	-8.22021
28	-5.50842	-3.06396	-14.4714	-8.74023	-17.3615	-10.0067	-8.90015	-15.8777	-15.0983	-8.22021
28.1	-5.4657	-3.07922	-14.4745	-8.73718	-17.3462	-10.022	-8.90564	-15.8533	-15.0934	-8.24097
28.2	-5.48401	-3.00903	-14.4928	-8.74329	-17.3645	-10.0281	-8.89709	-15.8728	-15.094	-8.2196
28.3	-5.49011	-3.06702	-14.505	-8.73413	-17.3431	-10.022	-8.91296	-15.8618	-15.1007	-8.20679
28.4	-5.49011	-3.06396	-14.5081	-8.75854	-17.3767	-10.0189	-8.90137	-15.8765	-15.1154	-8.21533
28.5	-5.51147	-3.06091	-14.4867	-8.7616	-17.3737	-10.0555	-8.88794	-15.8734	-15.1068	-8.22876
28.6	-5.48706	-3.04871	-14.5386	-8.75854	-17.3859	-10.0494	-8.92212	-15.8655	-15.0995	-8.24219
28.7	-5.51758	-3.0304	-14.4959	-8.74939	-17.3767	-10.0372	-8.89648	-15.8789	-15.1105	-8.23792
28.8	-5.49622	-3.05481	-14.5233	-8.76465	-17.3889	-10.0525	-8.91602	-15.8887	-15.1099	-8.2428
28.9	-5.50537	-3.00903	-14.5294	-8.75854	-17.4042	-10.0586	-8.89648	-15.8752	-15.1031	-8.21045
29	-5.49011	-3.0304	-14.5416	-8.74023	-17.4072	-10.0494	-8.89771	-15.8813	-15.1062	-8.22693
29.1	-5.49927	-3.0426	-14.5416	-8.78601	-17.4316	-10.0342	-8.90991	-15.8862	-15.1178	-8.21533
29.2	-5.51453	-3.02734	-14.5233	-8.74634	-17.4133	-10.0464	-8.91235	-15.8978	-15.1117	-8.21838
29.3	-5.51758	-3.04871	-14.5477	-8.75854	-17.4225	-10.0433	-8.90564	-15.9082	-15.1086	-8.20984
29.4	-5.50537	-3.03345	-14.5355	-8.75854	-17.4805	-10.0372	-8.91113	-15.8991	-15.1117	-8.21106
29.5	-5.51453	-3.03345	-14.5599	-8.78296	-17.45	-10.0617	-8.9209	-15.8978	-15.1373	-8.22327
29.6	-5.51453	-3.03345	-14.5538	-8.7616	-17.4377	-10.0525	-8.91541	-15.8948	-15.1105	-8.22815
29.7	-5.49927	-3.00598	-14.5569	-8.78296	-17.4408	-10.0922	-8.90564	-15.918	-15.1129	-8.23059
29.8	-5.51758	-3.04871	-14.5508	-8.79211	-17.4744	-10.0647	-8.89893	-15.9106	-15.1202	-8.20679
29.9	-5.50842	-3.03955	-14.5844	-8.77686	-17.4561	-10.0494	-8.90259	-15.8991	-15.1202	-8.23425
30	-5.50537	-3.03955	-14.5477	-8.75549	-17.4469	-10.0647	-8.93066	-15.9271	-15.1471	-8.21411
30.1	-5.49927	-3.00903	-14.5599	-8.79211	-17.4866	-10.083	-8.88611	-15.9119	-15.1294	-8.23364
30.2	-5.52063	-3.0304	-14.5813	-8.7738	-17.4835	-10.08	-8.92151	-15.9076	-15.1135	-8.21838
30.3	-5.50537	-3.0304	-14.5874	-8.78906	-17.4835	-10.0647	-8.89771	-15.9241	-15.1434	-8.21594
30.4	-5.52673	-3.00293	-14.566	-8.79822	-17.511	-10.083	-8.90869	-15.9125	-15.1288	-8.20984
30.5	-5.50842	-3.04565	-14.6027	-8.78906	-17.4988	-10.08	-8.91663	-15.9045	-15.1318	-8.23792
30.6	-5.51453	-3.01208	-14.5813	-8.78601	-17.4805	-10.0739	-8.90747	-15.9235	-15.1379	-8.22083
30.7	-5.52979	-3.01514	-14.5813	-8.76465	-17.5049	-10.0678	-8.90564	-15.9412	-15.1325	-8.22205
30.8	-5.52063	-3.01819	-14.5874	-8.78906	-17.5201	-10.0891	-8.90808	-15.9015	-15.13	-8.21472
30.9	-5.51758	-3.01514	-14.6149	-8.79517	-17.5201	-10.0769	-8.88794	-15.9277	-15.1532	-8.21899
31	-5.52673	-2.99988	-14.6118	-8.78296	-17.5293	-10.1013	-8.90564	-15.9265	-15.1331	-8.21899
31.1	-5.49316	-3.02734	-14.5905	-8.79517	-17.5018	-10.0891	-8.91663	-15.9375	-15.1361	-8.21838
31.2	-5.51453	-2.99683	-14.6057	-8.78906	-17.5598	-10.0769	-8.91602	-15.9192	-15.1379	-8.22876
31.3	-5.51453	-3.01819	-14.5935	-8.80127	-17.5507	-10.08	-8.91479	-15.9241	-15.1312	-8.21655
31.4	-5.52673	-3.01819	-14.6027	-8.80432	-17.5354	-10.083	-8.90869	-15.9308	-15.1343	-8.22266
31.5	-5.54199	-3.01819	-14.6057	-8.80737	-17.5385	-10.0739	-8.89832	-15.9375	-15.1325	-8.2251
31.6	-5.52368	-2.99683	-14.5874	-8.79517	-17.5812	-10.0952	-8.92273	-15.9229	-15.155	-8.22021
31.7	-5.53284	-2.99072	-14.6271	-8.80737	-17.572	-10.1013	-8.89832	-15.9387	-15.1337	-8.22021
31.8	-5.52368	-3.00903	-14.6179	-8.81042	-17.5812	-10.08	-8.9093	-15.9296	-15.1538	-8.2135
31.9	-5.51453	-3.01514	-14.6332	-8.80432	-17.5629	-10.0891	-8.88367	-15.9467	-15.1318	-8.22327
32	-5.53894	-3.00293	-14.6179	-8.78601	-17.5934	-10.1044	-8.93433	-15.9351	-15.1489	-8.19824
32.1	-5.53589	-2.99072	-14.6301	-8.80737	-17.5964	-10.0678	-8.90015	-15.9345	-15.1386	-8.22021
32.2	-5.54199	-3.00293	-14.6515	-8.79211	-17.5903	-10.0983	-8.92212	-15.9454	-15.1434	-8.21472
32.3	-5.51758	-2.99072	-14.6332	-8.79517	-17.5903	-10.1044	-8.91785	-15.9515	-15.1471	-8.2196
32.4	-5.5481	-3.01819	-14.6393	-8.79822	-17.5903	-10.0952	-8.90442	-15.9375	-15.1373	-8.21594
32.5	-5.51758	-2.99377	-14.621	-8.79211	-17.6117	-10.0861	-8.92334	-15.9381	-15.1392	-8.21167
32.6	-5.50232	-2.98157	-14.6393	-8.80127	-17.5934	-10.0861	-8.90625	-15.9613	-15.1617	-8.21777
32.7	-5.53284	-3.00903	-14.6484	-8.80737	-17.6422	-10.0769	-8.90503	-15.9497	-15.1569	-8.20496
32.8	-5.52979	-2.96631	-14.6362	-8.80127	-17.6148	-10.144	-8.90442	-15.9363	-15.1447	-8.23181
32.9	-5.52979	-3.00903	-14.6545	-8.81958	-17.6148	-10.0922	-8.91907	-15.9454	-15.1398	-8.20679
33	-5.50537	-2.98157	-14.6332	-8.82263	-17.6422	-10.0952	-8.90625	-15.9497	-15.1587	-8.21777
33.1	-5.5542	-2.97852	-14.6454	-8.80737	-17.6453	-10.0983	-8.91479	-15.9393	-15.1556	-8.21289
33.2	-5.53284	-2.99072	-14.6515	-8.80737	-17.6209	-10.1013	-8.90503	-15.9558	-15.1538	-8.22266
33.3	-5.53894	-2.98767	-14.6515	-8.81348	-17.6514	-10.1074	-8.90137	-15.9436	-15.1697	-8.2074
33.4	-5.50842	-2.97546	-14.6484	-8.80737	-17.6575	-10.0952	-8.90991	-15.9589	-15.1465	-8.22266
33.5	-5.50232	-3.00293	-14.6606	-8.80737	-17.6666	-10.1288	-8.9093	-15.9436	-15.1666	-8.21533
33.6	-5.53284	-2.96631	-14.6606	-8.79517	-17.6422	-10.1074	-8.89709	-15.946	-15.1611	-8.21594
33.7	-5.53589	-2.95715	-14.6484	-8.81958	-17.6514	-10.1166	-8.90137	-15.957	-15.166	-8.21472
33.8	-5.52063	-2.97852	-14.6668	-8.78601	-17.6483	-10.1074	-8.90381	-15.9619	-15.1581	-8.21167
33.9	-5.54504	-2.99683	-14.6576	-8.80737	-17.6453	-10.0952	-8.90503	-15.9601	-15.1642	-8.20923
34	-5.54199	-2.97241	-14.6851	-8.84399	-17.6605	-10.1013	-8.91174	-15.9546	-15.1721	-8.21167
34.1	-5.53894	-2.97546	-14.6484	-8.79517	-17.6575	-10.1074	-8.89893	-15.957	-15.1599	-8.20801
34.2	-5.56641	-3.00293	-14.6851	-8.81958	-17.6697	-10.0922	-8.89832	-15.9656	-15.1678	-8.20435
34.3	-5.54199	-2.96326	-14.6698	-8.83789	-17.6849	-10.08	-8.89465	-15.9552	-15.1697	-8.19824
34.4	-5.56946	-2.99072	-14.6759	-8.81042	-17.6758	-10.1105	-8.90686	-15.9607	-15.166	-8.21228
34.5	-5.51453	-2.98462	-14.6668	-8.83484	-17.6971	-10.1379	-8.89893	-15.9668	-15.1886	-8.2074
34.6	-5.5542	-2.96021	-14.6759	-8.81348	-17.7033	-10.0983	-8.91418	-15.9644	-15.1703	-8.21533
34.7	-5.53589	-2.97241	-14.6606	-8.82263	-17.6788	-10.1135	-8.91052	-15.9576	-15.1794	-8.21472
34.8	-5.52063	-2.97241	-14.6881	-8.82568	-17.6971	-10.0891	-8.90625	-15.9668	-15.1862	-8.20679
34.9	-5.5603	-2.9541	-14.6881	-8.81042	-17.6727	-10.1196	-8.89099	-15.9485	-15.1855	-8.2019
35	-5.52673	-2.96631	-14.6851	-8.81653	-17.7063	-10.1166	-8.92517	-15.9656	-15.1813	-8.18726
35.1	-5.50537	-2.96631	-14.6698	-8.82874	-17.6849	-10.1044	-8.89954	-15.954	-15.1782	-8.19031
35.2	-5.55115	-2.96021	-14.682	-8.81348	-17.6971	-10.1135	-8.92395	-15.9686	-15.1825	-8.21533
35.3	-5.5603	-2.96326	-14.6729	-8.82263	-17.7216	-10.1044	-8.89954	-15.9595	-15.2008	-8.2135
35.4	-5.53284	-2.98157	-14.6851	-8.80737	-17.7063	-10.1349	-8.93066	-15.9637	-15.1825	-8.21655
35.5	-5.53284	-2.96631	-14.679	-8.82874	-17.7124	-10.1196	-8.90259	-15.9418	-15.1807	-8.19824
35.6	-5.51453	-2.98157	-14.6851	-8.80737	-17.7216	-10.1227	-8.9032	-15.9778	-15.1868	-8.20007
35.7	-5.52673	-2.96631	-14.6912	-8.82568	-17.7338	-10.1044	-8.90686	-15.943	-15.2026	-8.19885
35.8	-5.52368	-2.9541	-14.7095	-8.82568	-17.7277	-10.141	-8.91235	-15.9534	-15.1868	-8.20801
35.9	-5.54504	-2.96936	-14.6729	-8.79517	-17.7155	-10.1318	-8.9209	-15.9656	-15.1849	-8.19946
36	-5.52673	-2.95105	-14.7125	-8.84094	-17.749	-10.1196	-8.88367	-15.9662	-15.1953	-8.20557
36.1	-5.52063	-2.95715	-14.6973	-8.81348	-17.7277	-10.1044	-8.92456	-15.9717	-15.1807	-8.20984
36.2	-5.52979	-2.98462	-14.7003	-8.81042	-17.749	-10.1379	-8.90015	-15.9796	-15.2045	-8.20007
36.3	-5.53894	-2.92664	-14.7064	-8.84705	-17.7429	-10.1227	-8.89404	-15.9631	-15.1733	-8.20129
36.4	-5.56946	-2.97241	-14.6942	-8.79517	-17.7307	-10.1379	-8.90625	-15.9479	-15.1849	-8.19275
36.5	-5.53589	-2.96936	-14.7003	-8.81958	-17.746	-10.141	-8.91418	-15.9711	-15.2039	-8.20679
36.6	-5.53894	-2.9541	-14.7003	-8.83179	-17.7521	-10.1379	-8.90137	-15.9668	-15.1825	-8.20374
36.7	-5.54504	-2.948	-14.7186	-8.82263	-17.7338	-10.0983	-8.90259	-15.9662	-15.191	-8.21411
36.8	-5.53284	-2.948	-14.6942	-8.81653	-17.7826	-10.1288	-8.90503	-15.9637	-15.1898	-8.20801
36.9	-5.56946	-2.94189	-14.7095	-8.81653	-17.7582	-10.1349	-8.91968	-15.9613	-15.1923	-8.19641
37	-5.52673	-2.948	-14.7064	-8.82874	-17.7521	-10.1349	-8.90564	-15.9692	-15.1959	-8.20313
37.1	-5.55725	-2.96631	-14.7186	-8.81958	-17.7704	-10.1166	-8.90808	-15.9692	-15.1904	-8.21716
37.2	-5.53284	-2.96936	-14.7156	-8.81348	-17.7673	-10.1166	-8.89099	-15.9827	-15.202	-8.18054
37.3	-5.55725	-2.93274	-14.7003	-8.81958	-17.7582	-10.1227	-8.89587	-15.957	-15.213	-8.19275
37.4	-5.51758	-2.96326	-14.7339	-8.80737	-17.7673	-10.1105	-8.90625	-15.9863	-15.2026	-8.20068
37.5	-5.56335	-2.90833	-14.7125	-8.82874	-17.7399	-10.1349	-8.89832	-15.9613	-15.1971	-8.20129
37.6	-5.54199	-2.948	-14.7156	-8.80737	-17.7551	-10.1074	-8.91174	-15.9723	-15.1892	-8.18481
37.7	-5.55725	-2.98157	-14.7308	-8.79517	-17.7856	-10.1746	-8.89404	-15.9869	-15.2051	-8.20557
37.8	-5.54199	-2.90527	-14.7553	-8.83484	-17.749	-10.1318	-8.9032	-15.9656	-15.2039	-8.21655
37.9	-5.57251	-2.96021	-14.7278	-8.84094	-17.7795	-10.1105	-8.9209	-15.9717	-15.2148	-8.19336
38	-5.53894	-2.92969	-14.7308	-8.79517	-17.7734	-10.1318	-8.91541	-15.9839	-15.2033	-8.19397
38.1	-5.57251	-2.948	-14.7217	-8.82263	-17.7612	-10.1288	-8.88977	-15.954	-15.2197	-8.20129
38.2	-5.54199	-2.93274	-14.7492	-8.81348	-17.7856	-10.1379	-8.88489	-15.9772	-15.2063	-8.20862
38.3	-5.56335	-2.94189	-14.7217	-8.81653	-17.7918	-10.144	-8.91174	-15.9589	-15.2094	-8.20862
38.4	-5.51453	-2.93579	-14.7369	-8.79211	-17.7643	-10.1074	-8.90503	-15.9821	-15.2106	-8.2074
38.5	-5.56335	-2.95715	-14.743	-8.79822	-17.7856	-10.141	-8.89709	-15.9815	-15.2045	-8.2135
38.6	-5.54199	-2.91748	-14.7492	-8.81958	-17.7612	-10.1227	-8.927	-15.965	-15.2173	-8.20129
38.7	-5.55115	-2.94189	-14.7614	-8.79517	-17.8009	-10.1349	-8.89282	-15.9741	-15.2075	-8.20007
38.8	-5.56641	-2.93274	-14.7369	-8.79822	-17.7856	-10.1166	-8.90442	-15.9802	-15.2228	-8.1958
38.9	-5.55115	-2.91138	-14.7583	-8.81348	-17.8009	-10.1593	-8.89221	-15.9668	-15.2063	-8.19458
39	-5.52368	-2.96631	-14.7339	-8.82263	-17.7979	-10.144	-8.91357	-15.9772	-15.2203	-8.20496
39.1	-5.54199	-2.90527	-14.7766	-8.79822	-17.807	-10.1257	-8.89709	-15.9772	-15.2264	-8.20496
39.2	-5.5542	-2.94189	-14.7522	-8.81958	-17.8162	-10.1379	-8.90686	-15.9753	-15.2271	-8.19763
39.3	-5.54199	-2.90222	-14.7461	-8.80432	-17.804	-10.141	-8.89404	-15.9912	-15.2112	-8.2019
39.4	-5.5603	-2.94495	-14.7858	-8.79517	-17.7887	-10.1379	-8.91418	-15.9717	-15.2228	-8.20801
39.5	-5.56641	-2.91138	-14.7614	-8.82568	-17.8101	-10.1654	-8.90503	-15.9808	-15.2295	-8.19702
39.6	-5.53589	-2.94495	-14.7583	-8.81348	-17.8436	-10.1105	-8.8916	-15.9698	-15.2148	-8.19946
39.7	-5.56335	-2.91748	-14.7705	-8.81958	-17.807	-10.1288	-8.90015	-15.979	-15.213	-8.21289
39.8	-5.53894	-2.92358	-14.7553	-8.82568	-17.8131	-10.1349	-8.90137	-15.9778	-15.2301	-8.20435
39.9	-5.56335	-2.91748	-14.7919	-8.80127	-17.8375	-10.144	-8.91235	-15.9955	-15.2106	-8.20068
40	-5.56946	-2.91443	-14.7644	-8.80432	-17.8101	-10.141	-8.88855	-15.9992	-15.2295	-8.20984
40.1	-5.56946	-2.91443	-14.7583	-8.80432	-17.8101	-10.1502	-8.89954	-15.9784	-15.202	-8.19397
40.2	-5.5542	-2.92664	-14.7827	-8.82568	-17.8131	-10.1379	-8.92273	-15.9961	-15.2386	-8.20618
40.3	-5.53589	-2.88696	-14.7797	-8.81348	-17.8314	-10.141	-8.89465	-15.9839	-15.2228	-8.19214
40.4	-5.57861	-2.91138	-14.7797	-8.82874	-17.8589	-10.1288	-8.90808	-15.979	-15.2313	-8.19824
40.5	-5.53589	-2.93884	-14.8071	-8.81348	-17.8314	-10.1471	-8.90686	-15.9961	-15.2277	-8.19458
40.6	-5.57251	-2.91748	-14.7766	-8.80432	-17.8436	-10.1471	-8.89038	-15.9918	-15.224	-8.18481
40.7	-5.55725	-2.92358	-14.7919	-8.78906	-17.8406	-10.1288	-8.91052	-15.9741	-15.2338	-8.19458
40.8	-5.5542	-2.90222	-14.7766	-8.81653	-17.8558	-10.144	-8.91663	-15.9943	-15.2325	-8.18298
40.9	-5.56335	-2.92358	-14.7949	-8.80127	-17.865	-10.1349	-8.88367	-15.9943	-15.2362	-8.18665
41	-5.57556	-2.91748	-14.8163	-8.83179	-17.8192	-10.141	-8.89648	-15.9882	-15.2508	-8.18909
41.1	-5.54199	-2.91443	-14.8132	-8.81958	-17.8558	-10.1471	-8.9032	-15.9973	-15.2264	-8.17444
41.2	-5.58167	-2.89917	-14.8041	-8.82263	-17.8436	-10.1502	-8.89893	-16.0053	-15.2374	-8.18176
41.3	-5.56641	-2.93884	-14.8041	-8.81042	-17.8314	-10.1379	-8.91602	-15.9937	-15.2362	-8.19885
41.4	-5.55725	-2.89917	-14.8193	-8.81653	-17.8742	-10.1318	-8.89282	-15.9967	-15.2344	-8.18909
41.5	-5.57861	-2.89917	-14.8163	-8.79822	-17.8619	-10.144	-8.89954	-15.9967	-15.2197	-8.1842
41.6	-5.57861	-2.93274	-14.7919	-8.79822	-17.8558	-10.1471	-8.89709	-16.0016	-15.2393	-8.18054
41.7	-5.58777	-2.89001	-14.8102	-8.80737	-17.8467	-10.1532	-8.90503	-16.0059	-15.2551	-8.19275
41.8	-5.5603	-2.88696	-14.8163	-8.81653	-17.8497	-10.1562	-8.89954	-15.9943	-15.2356	-8.16895
41.9	-5.56335	-2.92358	-14.8102	-8.78296	-17.8742	-10.1349	-8.89465	-16.0071	-15.2386	-8.19946
42	-5.5481	-2.89307	-14.798	-8.83179	-17.8589	-10.1257	-8.89343	-16.0028	-15.2435	-8.17322
42.1	-5.59692	-2.90833	-14.8071	-8.80737	-17.868	-10.1471	-8.88733	-15.9882	-15.2246	-8.18115
42.2	-5.52368	-2.88696	-14.8193	-8.80432	-17.8833	-10.1471	-8.90564	-16.001	-15.238	-8.17993
42.3	-5.56335	-2.89307	-14.8041	-8.82263	-17.8894	-10.1349	-8.89954	-16.0065	-15.224	-8.1897
42.4	-5.58472	-2.91748	-14.798	-8.80432	-17.8894	-10.1532	-8.89221	-16.0132	-15.2454	-8.17505
42.5	-5.5603	-2.89612	-14.801	-8.79211	-17.8833	-10.1318	-8.89893	-16.001	-15.2264	-8.18237
42.6	-5.58167	-2.89917	-14.8224	-8.78906	-17.8894	-10.144	-8.88916	-15.9992	-15.2429	-8.18787
42.7	-5.58472	-2.90527	-14.8102	-8.81042	-17.8528	-10.1471	-8.88916	-16.0004	-15.2454	-8.17688
42.8	-5.56335	-2.87781	-14.8102	-8.80127	-17.8986	-10.1502	-8.89038	-16.0089	-15.2362	-8.18787
42.9	-5.55725	-2.89917	-14.8254	-8.80737	-17.8864	-10.1318	-8.88062	-15.9937	-15.2411	-8.17505
43	-5.5481	-2.88391	-14.8285	-8.78906	-17.8864	-10.1379	-8.89465	-16.0144	-15.2319	-8.17444
43.1	-5.57251	-2.88391	-14.8163	-8.81348	-17.868	-10.1318	-8.89465	-16.0004	-15.2283	-8.16467
43.2	-5.58167	-2.91748	-14.8346	-8.81653	-17.9077	-10.1471	-8.88428	-16.0114	-15.2271	-8.18481
43.3	-5.5481	-2.89307	-14.8346	-8.80127	-17.9047	-10.1471	-8.88245	-16.0071	-15.2447	-8.1781
43.4	-5.5542	-2.89612	-14.8132	-8.79517	-17.8864	-10.1532	-8.88	-16.0236	-15.2411	-8.16589
43.5	-5.57251	-2.89612	-14.8346	-8.79517	-17.8864	-10.1196	-8.8916	-16.0169	-15.2582	-8.16895
43.6	-5.56641	-2.94189	-14.8254	-8.80127	-17.8925	-10.1471	-8.89404	-16.0059	-15.2435	-8.17871
43.7	-5.55725	-2.88391	-14.8377	-8.80127	-17.8742	-10.1227	-8.88916	-16.0352	-15.2386	-8.15735
43.8	-5.58167	-2.88696	-14.8407	-8.77686	-17.8986	-10.1349	-8.87939	-16.0199	-15.2264	-8.16406
43.9	-5.56641	-2.88086	-14.8163	-8.78906	-17.9077	-10.1288	-8.88977	-16.0297	-15.2472	-8.17017
44	-5.57251	-2.89001	-14.8407	-8.78906	-17.8955	-10.1502	-8.88916	-16.0223	-15.2441	-8.15796
44.1	-5.58167	-2.89001	-14.8438	-8.80432	-17.8955	-10.1196	-8.86841	-16.0284	-15.2399	-8.16711
44.2	-5.55725	-2.89001	-14.8468	-8.80127	-17.8986	-10.1288	-8.89587	-16.0223	-15.2362	-8.15979
44.3	-5.57861	-2.88086	-14.8285	-8.79822	-17.8894	-10.1166	-8.88245	-16.0333	-15.2313	-8.17261
44.4	-5.55725	-2.88391	-14.8315	-8.78601	-17.8986	-10.1196	-8.87939	-16.0181	-15.246	-8.16833
44.5	-5.5481	-2.91443	-14.8377	-8.7738	-17.9138	-10.1288	-8.87756	-16.0101	-15.2472	-8.14819
44.6	-5.55725	-2.89612	-14.8224	-8.80737	-17.9077	-10.1502	-8.87573	-16.0175	-15.235	-8.15979
44.7	-5.5542	-2.85339	-14.8193	-8.78601	-17.9047	-10.1135	-8.87024	-16.0095	-15.2466	-8.15796
44.8	-5.59692	-2.89307	-14.8346	-8.77686	-17.926	-10.1379	-8.88428	-16.0205	-15.2423	-8.14697
44.9	-5.57556	-2.89307	-14.8407	-8.77686	-17.9077	-10.1349	-8.86414	-16.0278	-15.2435	-8.15552
45	-5.5542	-2.87476	-14.8285	-8.79211	-17.8986	-10.1349	-8.8678	-16.026	-15.2405	-8.17078
45.1	-5.56946	-2.91748	-14.8254	-8.77686	-17.9016	-10.1135	-8.87329	-16.023	-15.246	-8.13232
45.2	-5.58777	-2.8656	-14.8254	-8.79211	-17.923	-10.1502	-8.87451	-16.0291	-15.2508	-8.17017
45.3	-5.56946	-2.86865	-14.856	-8.78601	-17.8955	-10.1471	-8.85437	-16.0162	-15.238	-8.16772
45.4	-5.57556	-2.91138	-14.856	-8.77686	-17.923	-10.1349	-8.86536	-16.0242	-15.2429	-8.15918
45.5	-5.5603	-2.90222	-14.8193	-8.79822	-17.9443	-10.1257	-8.86597	-16.0345	-15.2484	-8.14148
45.6	-5.58167	-2.8595	-14.8438	-8.78906	-17.8955	-10.1074	-8.87085	-16.0175	-15.2307	-8.15491
45.7	-5.57556	-2.89307	-14.8315	-8.7738	-17.9169	-10.1471	-8.86475	-16.0156	-15.2423	-8.1488
45.8	-5.55115	-2.88696	-14.8346	-8.79211	-17.9565	-10.1227	-8.86597	-16.0248	-15.2393	-8.15735
45.9	-5.57861	-2.89307	-14.8377	-8.77991	-17.9443	-10.1196	-8.86414	-16.0217	-15.2582	-8.15002
46	-5.56641	-2.87781	-14.8468	-8.78906	-17.9138	-10.1318	-8.84033	-16.0199	-15.2386	-8.1427
46.1	-5.58777	-2.8656	-14.8438	-8.77991	-17.9535	-10.1288	-8.87268	-16.0266	-15.2362	-8.1488
46.2	-5.55725	-2.90833	-14.8377	-8.78296	-17.926	-10.1166	-8.85986	-16.0266	-15.2502	-8.14209
46.3	-5.59998	-2.84424	-14.8315	-8.79211	-17.923	-10.1349	-8.86597	-16.0303	-15.2545	-8.14514
46.4	-5.56641	-2.89307	-14.8407	-8.76465	-17.9413	-10.1257	-8.85986	-16.0339	-15.2447	-8.15796
46.5	-5.5603	-2.89001	-14.8438	-8.77991	-17.9321	-10.1227	-8.86475	-16.04	-15.2496	-8.14819
46.6	-5.55725	-2.87476	-14.8498	-8.79822	-17.9504	-10.1013	-8.85376	-16.0443	-15.2472	-8.15857
46.7	-5.5603	-2.8717	-14.8651	-8.7738	-17.9352	-10.1227	-8.85376	-16.0352	-15.2411	-8.14087
46.8	-5.57861	-2.85034	-14.8621	-8.78906	-17.9474	-10.1227	-8.86292	-16.0376	-15.2374	-8.14209
46.9	-5.58777	-2.87781	-14.8163	-8.77686	-17.9138	-10.1349	-8.84827	-16.0419	-15.2325	-8.13293
47	-5.58167	-2.88086	-14.8529	-8.77991	-17.9504	-10.1196	-8.87146	-16.04	-15.2484	-8.14575
47.1	-5.58472	-2.86255	-14.8377	-8.77686	-17.9596	-10.1349	-8.8501	-16.0474	-15.2429	-8.13843
47.2	-5.60608	-2.88696	-14.8377	-8.7738	-17.9474	-10.1288	-8.85315	-16.0291	-15.2441	-8.16162
47.3	-5.5542	-2.8656	-14.8498	-8.78601	-17.9504	-10.1288	-8.85376	-16.0297	-15.2496	-8.13049
47.4	-5.57251	-2.83813	-14.8498	-8.77686	-17.9504	-10.1257	-8.85681	-16.0577	-15.2454	-8.13965
47.5	-5.60303	-2.86865	-14.8163	-8.74329	-17.9688	-10.0952	-8.84888	-16.0461	-15.2515	-8.14209
47.6	-5.57251	-2.89307	-14.856	-8.7738	-17.926	-10.1257	-8.85559	-16.0339	-15.2515	-8.14209
47.7	-5.5603	-2.87476	-14.8132	-8.75549	-17.9748	-10.1532	-8.85498	-16.048	-15.2454	-8.12866
47.8	-5.56946	-2.86865	-14.8651	-8.7616	-17.9504	-10.0983	-8.83484	-16.0559	-15.2594	-8.1366
47.9	-5.58167	-2.87476	-14.8071	-8.79211	-17.9382	-10.0952	-8.86353	-16.0364	-15.2466	-8.13232
48	-5.58167	-2.85034	-14.8163	-8.77686	-17.9382	-10.1166	-8.84583	-16.0413	-15.2527	-8.13049
48.1	-5.57861	-2.87781	-14.8377	-8.75854	-17.9504	-10.1288	-8.84399	-16.0541	-15.2545	-8.12195
48.2	-5.57251	-2.84424	-14.8163	-8.75244	-17.9474	-10.141	-8.85254	-16.0333	-15.2338	-8.13782
48.3	-5.58167	-2.8595	-14.8071	-8.75854	-17.9596	-10.1288	-8.84399	-16.0504	-15.2429	-8.13538
48.4	-5.59998	-2.86255	-14.8254	-8.7616	-17.9474	-10.1105	-8.83972	-16.0339	-15.2533	-8.12439
48.5	-5.56335	-2.86255	-14.8315	-8.75854	-17.9535	-10.0922	-8.84583	-16.0272	-15.2252	-8.13599
48.6	-5.55115	-2.86865	-14.8285	-8.7677	-17.9535	-10.1196	-8.80737	-16.0559	-15.2441	-8.13477
48.7	-5.57556	-2.84119	-14.8193	-8.7677	-17.9596	-10.1105	-8.85803	-16.0571	-15.2447	-8.12866
48.8	-5.58777	-2.85339	-14.8377	-8.7616	-17.9688	-10.1135	-8.84705	-16.051	-15.2478	-8.12561
48.9	-5.59082	-2.86865	-14.8132	-8.77075	-17.9474	-10.1105	-8.83606	-16.0504	-15.2496	-8.12744
49	-5.57861	-2.88086	-14.8224	-8.75244	-17.9443	-10.1166	-8.85071	-16.0345	-15.2478	-8.12073
49.1	-5.53284	-2.8717	-14.8346	-8.75854	-17.9596	-10.1044	-8.83972	-16.0498	-15.2435	-8.12561
49.2	-5.60913	-2.8595	-14.8163	-8.74634	-17.9718	-10.1105	-8.83362	-16.0376	-15.2386	-8.12134
49.3	-5.53894	-2.8656	-14.8163	-8.75854	-17.9596	-10.1166	-8.83545	-16.0486	-15.249	-8.12073
49.4	-5.58777	-2.8595	-14.8041	-8.7616	-17.9565	-10.1227	-8.8385	-16.0523	-15.2325	-8.11829
49.5	-5.54504	-2.85034	-14.8071	-8.75244	-17.981	-10.0922	-8.84033	-16.0437	-15.2374	-8.12988
49.6	-5.57251	-2.89612	-14.8285	-8.74939	-17.981	-10.1135	-8.83057	-16.0272	-15.2338	-8.12195
49.7	-5.57861	-2.84729	-14.8163	-8.7616	-17.9748	-10.1196	-8.83545	-16.0467	-15.2332	-8.125
49.8	-5.56946	-2.84119	-14.798	-8.75854	-17.9688	-10.1227	-8.82263	-16.0278	-15.2325	-8.10852
49.9	-5.58167	-2.8717	-14.8071	-8.75854	-17.9596	-10.1105	-8.83789	-16.0376	-15.249	-8.13599
50	-5.55725	-2.82288	-14.8224	-8.75549	-17.9504	-10.1318	-8.84949	-16.0504	-15.2289	-8.11768
50.1	-5.60913	-2.86865	-14.801	-8.74939	-18.0054	-10.1105	-8.83484	-16.0217	-15.2429	-8.11157
50.2	-5.56335	-2.86865	-14.801	-8.75549	-17.9565	-10.1135	-8.81592	-16.0358	-15.2362	-8.13171
50.3	-5.60608	-2.83508	-14.8407	-8.75244	-17.9474	-10.0983	-8.82446	-16.0443	-15.2319	-8.12744
50.4	-5.5542	-2.86865	-14.8071	-8.76465	-17.9748	-10.1196	-8.85071	-16.0223	-15.2252	-8.10547
50.5	-5.58777	-2.8595	-14.8193	-8.74329	-17.9901	-10.1074	-8.8324	-16.0541	-15.2362	-8.11462
50.6	-5.56641	-2.8595	-14.8315	-8.75549	-17.9932	-10.1135	-8.84216	-16.0254	-15.2441	-8.11707
50.7	-5.58167	-2.80457	-14.8132	-8.73718	-17.9779	-10.1044	-8.82751	-16.0242	-15.2429	-8.11707
50.8	-5.5542	-2.85339	-14.8041	-8.7616	-17.9688	-10.1044	-8.82568	-16.0614	-15.246	-8.11218
50.9	-5.57861	-2.85645	-14.8193	-8.74634	-17.9657	-10.1196	-8.82385	-16.023	-15.235	-8.11279
51	-5.5603	-2.85339	-14.7949	-8.74939	-17.9779	-10.1257	-8.82751	-16.0498	-15.2502	-8.11523
51.1	-5.5603	-2.84424	-14.8071	-8.75244	-17.984	-10.1074	-8.83118	-16.0175	-15.2502	-8.12683
51.2	-5.5542	-2.85339	-14.8224	-8.72498	-17.9993	-10.1013	-8.82751	-16.0547	-15.2264	-8.10913
51.3	-5.55725	-2.86255	-14.8193	-8.7677	-17.9962	-10.0983	-8.83728	-16.0217	-15.238	-8.11707
51.4	-5.59692	-2.86255	-14.8224	-8.74023	-17.9535	-10.0983	-8.84094	-16.0345	-15.2386	-8.10486
51.5	-5.5481	-2.8595	-14.8163	-8.73718	-17.981	-10.0891	-8.81775	-16.04	-15.2563	-8.11279
51.6	-5.59387	-2.83813	-14.8132	-8.71887	-17.9871	-10.0861	-8.82568	-16.0406	-15.246	-8.11951
51.7	-5.56946	-2.83508	-14.798	-8.74634	-17.9962	-10.1074	-8.83301	-16.0181	-15.2417	-8.11096
51.8	-5.57556	-2.8717	-14.8071	-8.74329	-17.9748	-10.1227	-8.82629	-16.0309	-15.2515	-8.10852
51.9	-5.58167	-2.82898	-14.8254	-8.70972	-17.9962	-10.1013	-8.84888	-16.0352	-15.2643	-8.1073
52	-5.57556	-2.84424	-14.8071	-8.73413	-17.984	-10.08	-8.82385	-16.0309	-15.2545	-8.09387
52.1	-5.5603	-2.85645	-14.8193	-8.73718	-17.984	-10.1074	-8.8208	-16.0352	-15.2362	-8.10364
52.2	-5.57556	-2.8595	-14.8041	-8.74329	-17.9901	-10.1257	-8.82935	-16.0284	-15.2393	-8.1189
52.3	-5.59387	-2.79846	-14.8071	-8.74329	-17.981	-10.1135	-8.81714	-16.0278	-15.2496	-8.09875
52.4	-5.57251	-2.83203	-14.798	-8.73108	-17.9993	-10.1074	-8.81409	-16.0523	-15.2429	-8.10913
52.5	-5.60303	-2.8656	-14.8071	-8.74023	-17.9962	-10.1044	-8.82813	-16.0406	-15.2417	-8.10486
52.6	-5.56335	-2.83203	-14.8132	-8.71887	-17.9901	-10.0739	-8.82874	-16.0211	-15.2527	-8.1189
52.7	-5.55725	-2.83508	-14.801	-8.75549	-17.9901	-10.1166	-8.81775	-16.0327	-15.2527	-8.09631
52.8	-5.55725	-2.81982	-14.7949	-8.74329	-17.9901	-10.1074	-8.82324	-16.0364	-15.2386	-8.11279
52.9	-5.58472	-2.82593	-14.8193	-8.71582	-17.984	-10.08	-8.82751	-16.0278	-15.2527	-8.09692
53	-5.57251	-2.84119	-14.7919	-8.72498	-17.9993	-10.1105	-8.79761	-16.026	-15.2454	-8.11646
53.1	-5.57556	-2.82288	-14.8132	-8.73718	-17.981	-10.1044	-8.83118	-16.0413	-15.2332	-8.10669
53.2	-5.57861	-2.83203	-14.8102	-8.72192	-17.984	-10.0983	-8.83057	-16.023	-15.2386	-8.09631
53.3	-5.55725	-2.83813	-14.8041	-8.71277	-17.9901	-10.1013	-8.81409	-16.0553	-15.2466	-8.10364
53.4	-5.55725	-2.84119	-14.798	-8.72192	-17.9962	-10.08	-8.81653	-16.0175	-15.2441	-8.12378
53.5	-5.57556	-2.86255	-14.8163	-8.72498	-17.9779	-10.1166	-8.81531	-16.0223	-15.2411	-8.10486
53.6	-5.56641	-2.81982	-14.8224	-8.75854	-18.0115	-10.0952	-8.82446	-16.037	-15.2228	-8.10059
53.7	-5.60303	-2.85034	-14.798	-8.71887	-18.0023	-10.0952	-8.82263	-16.0376	-15.2557	-8.09204
53.8	-5.57556	-2.85034	-14.8163	-8.70972	-18.0267	-10.0983	-8.8208	-16.0425	-15.2539	-8.1012
53.9	-5.59692	-2.84729	-14.8132	-8.72192	-18.0115	-10.0891	-8.83118	-16.04	-15.2557	-8.08044
54	-5.56641	-2.84119	-14.8254	-8.71887	-18.0237	-10.0983	-8.80371	-16.0284	-15.2374	-8.10974
54.1	-5.55115	-2.84424	-14.8041	-8.71582	-18.0084	-10.0861	-8.82263	-16.048	-15.2557	-8.10547
54.2	-5.56946	-2.81982	-14.8163	-8.70972	-17.9779	-10.0922	-8.81653	-16.0193	-15.2551	-8.10486
54.3	-5.56946	-2.8595	-14.8041	-8.71582	-18.0115	-10.0739	-8.80554	-16.0333	-15.2545	-8.1073
54.4	-5.56335	-2.81372	-14.8071	-8.72498	-17.9932	-10.0952	-8.82385	-16.0364	-15.2423	-8.09326
54.5	-5.58777	-2.85034	-14.8254	-8.70361	-18.0115	-10.083	-8.79395	-16.0242	-15.2594	-8.10242
54.6	-5.5603	-2.84119	-14.8041	-8.72803	-18.0023	-10.0952	-8.80371	-16.0382	-15.2496	-8.08167
54.7	-5.5542	-2.84119	-14.8041	-8.72192	-17.9962	-10.0617	-8.81348	-16.0339	-15.2429	-8.10486
54.8	-5.59998	-2.81677	-14.8041	-8.71887	-18.0267	-10.0983	-8.82629	-16.0175	-15.2747	-8.09631
54.9	-5.55725	-2.83508	-14.8071	-8.71277	-18.0145	-10.0647	-8.80188	-16.0242	-15.2515	-8.08594
55	-5.57556	-2.80151	-14.8224	-8.72803	-18.0328	-10.0983	-8.81592	-16.0309	-15.2393	-8.09814
55.1	-5.57861	-2.83813	-14.8041	-8.71887	-18.0176	-10.0952	-8.80798	-16.0138	-15.2533	-8.09875
55.2	-5.5481	-2.80762	-14.8193	-8.72192	-17.9932	-10.0678	-8.80432	-16.0242	-15.2405	-8.08899
55.3	-5.56335	-2.83508	-14.8285	-8.69751	-18.0145	-10.0891	-8.8147	-16.0327	-15.2466	-8.08838
55.4	-5.58167	-2.84119	-14.8071	-8.70056	-18.0176	-10.0617	-8.80005	-16.0278	-15.2588	-8.07922
55.5	-5.56641	-2.80457	-14.8102	-8.70361	-17.984	-10.0861	-8.81226	-16.0413	-15.2508	-8.09326
55.6	-5.57861	-2.84729	-14.8163	-8.70667	-18.0298	-10.0922	-8.8092	-16.0327	-15.2533	-8.09387
55.7	-5.54199	-2.84119	-14.8315	-8.70667	-18.0176	-10.1074	-8.82263	-16.0156	-15.257	-8.09753
55.8	-5.60303	-2.85645	-14.8285	-8.71582	-17.9962	-10.08	-8.80859	-16.0376	-15.2576	-8.08533
55.9	-5.58777	-2.82593	-14.8346	-8.70056	-18.0145	-10.08	-8.81104	-16.0339	-15.2447	-8.09387
56	-5.58777	-2.85034	-14.798	-8.70667	-18.0054	-10.0739	-8.8031	-16.0413	-15.2661	-8.08777
56.1	-5.56946	-2.83508	-14.8193	-8.72192	-18.0206	-10.0769	-8.82996	-16.0431	-15.2551	-8.0896
56.2	-5.57556	-2.81982	-14.8193	-8.71582	-17.9962	-10.0769	-8.79639	-16.0327	-15.2582	-8.08655
56.3	-5.56946	-2.81677	-14.8346	-8.71582	-18.0298	-10.0617	-8.8031	-16.0321	-15.2502	-8.09082
56.4	-5.57556	-2.82593	-14.801	-8.67004	-17.9932	-10.0739	-8.8147	-16.037	-15.2521	-8.08838
56.5	-5.53894	-2.82288	-14.8224	-8.70972	-18.0298	-10.0861	-8.79456	-16.0486	-15.2399	-8.09875
56.6	-5.57251	-2.83813	-14.8315	-8.68835	-17.9993	-10.0769	-8.79517	-16.0223	-15.257	-8.0896
56.7	-5.56641	-2.79541	-14.8285	-8.70667	-18.0145	-10.0708	-8.79822	-16.0541	-15.2563	-8.10486
56.8	-5.54504	-2.82593	-14.8102	-8.68225	-17.981	-10.0525	-8.80432	-16.0492	-15.2612	-8.08167
56.9	-5.59692	-2.82288	-14.8407	-8.68225	-18.0115	-10.0769	-8.81226	-16.0223	-15.2679	-8.1012
57	-5.5481	-2.83508	-14.8285	-8.6853	-18.0115	-10.083	-8.80676	-16.0437	-15.26	-8.08655
57.1	-5.5542	-2.82898	-14.8438	-8.71277	-18.042	-10.083	-8.78784	-16.0425	-15.2722	-8.07922
57.2	-5.60303	-2.79846	-14.8377	-8.69446	-18.0145	-10.0678	-8.79883	-16.0303	-15.2594	-8.08411
57.3	-5.56641	-2.84729	-14.8102	-8.71277	-18.0023	-10.0617	-8.80859	-16.0577	-15.2728	-8.08411
57.4	-5.57556	-2.85645	-14.8254	-8.69446	-18.0054	-10.0922	-8.81958	-16.0291	-15.246	-8.07861
57.5	-5.55115	-2.81982	-14.8346	-8.70667	-17.9932	-10.0555	-8.8031	-16.0376	-15.2551	-8.08105
57.6	-5.59692	-2.86255	-14.8346	-8.6853	-18.0237	-10.083	-8.80066	-16.0437	-15.2716	-8.07556
57.7	-5.59692	-2.82288	-14.8224	-8.69141	-18.0328	-10.0769	-8.79578	-16.0352	-15.2685	-8.08228
57.8	-5.59998	-2.82593	-14.8346	-8.69751	-18.0328	-10.0739	-8.81287	-16.0529	-15.2502	-8.08655
57.9	-5.58167	-2.80151	-14.8407	-8.69751	-18.0054	-10.0464	-8.78784	-16.0297	-15.2692	-8.06702
58	-5.59082	-2.82593	-14.856	-8.67615	-18.042	-10.0891	-8.79211	-16.0486	-15.2631	-8.08472
58.1	-5.5603	-2.82898	-14.8224	-8.68225	-18.0206	-10.0525	-8.81165	-16.0303	-15.2515	-8.08289
58.2	-5.61218	-2.84119	-14.8163	-8.68835	-18.0023	-10.08	-8.80859	-16.0425	-15.2661	-8.08777
58.3	-5.58472	-2.85339	-14.8438	-8.6792	-18.0298	-10.0433	-8.80066	-16.0663	-15.2631	-8.07007
58.4	-5.57556	-2.80151	-14.859	-8.6792	-17.9932	-10.08	-8.7915	-16.0388	-15.2661	-8.07556
58.5	-5.58777	-2.83508	-14.8529	-8.69446	-18.0145	-10.0678	-8.80859	-16.0376	-15.2685	-8.07373
58.6	-5.5542	-2.84424	-14.8315	-8.68225	-18.0298	-10.0433	-8.79272	-16.0467	-15.2606	-8.08838
58.7	-5.58167	-2.81982	-14.8438	-8.65173	-18.0328	-10.0739	-8.78418	-16.0559	-15.2698	-8.07617
58.8	-5.58777	-2.81677	-14.8346	-8.68225	-18.0206	-10.0769	-8.77808	-16.0303	-15.2637	-8.07861
58.9	-5.5603	-2.83203	-14.8315	-8.67615	-18.0206	-10.0617	-8.78479	-16.0315	-15.2692	-8.06274
59	-5.58472	-2.78931	-14.8285	-8.67615	-18.0542	-10.0769	-8.7915	-16.0577	-15.282	-8.08044
59.1	-5.5603	-2.80457	-14.8438	-8.67004	-18.0176	-10.0861	-8.78845	-16.0406	-15.2679	-8.07129
59.2	-5.58777	-2.81067	-14.8254	-8.66699	-18.0206	-10.0769	-8.78418	-16.0382	-15.2557	-8.0896
59.3	-5.60608	-2.82288	-14.8498	-8.67615	-18.0145	-10.0586	-8.79028	-16.0455	-15.2606	-8.078
59.4	-5.56946	-2.83508	-14.8468	-8.66089	-18.0542	-10.0555	-8.79578	-16.0498	-15.2826	-8.08777
59.5	-5.57861	-2.81372	-14.8377	-8.67004	-18.0237	-10.0678	-8.78052	-16.0663	-15.2722	-8.0719
59.6	-5.57556	-2.80457	-14.8407	-8.66699	-18.0542	-10.0586	-8.79456	-16.0541	-15.2624	-8.07983
59.7	-5.60303	-2.81677	-14.8224	-8.67615	-18.0298	-10.0555	-8.79883	-16.0467	-15.2527	-8.05176
59.8	-5.58167	-2.81982	-14.8377	-8.64563	-18.0267	-10.0586	-8.77502	-16.0492	-15.2563	-8.07251
59.9	-5.57556	-2.80151	-14.8468	-8.66699	-18.0328	-10.0678	-8.7738	-16.0339	-15.2667	-8.07556
60	-5.58472	-2.80151	-14.8529	-8.66394	-18.042	-10.0586	-8.78601	-16.0614	-15.2814	-8.07922
60.1	-5.5603	-2.83203	-14.8407	-8.6731	-18.0298	-10.0403	-8.78296	-16.0596	-15.2563	-8.06152
60.2	-5.60303	-2.81372	-14.8315	-8.65479	-18.0298	-10.0617	-8.78784	-16.048	-15.2692	-8.07312
60.3	-5.56641	-2.83813	-14.8315	-8.66699	-18.0237	-10.0678	-8.77258	-16.0492	-15.2527	-8.0603
60.4	-5.57556	-2.84119	-14.856	-8.64868	-18.0389	-10.0708	-8.79211	-16.0626	-15.2643	-8.06274
60.5	-5.5603	-2.81677	-14.8315	-8.6731	-18.0267	-10.0678	-8.78296	-16.0437	-15.2447	-8.0603
60.6	-5.58472	-2.78931	-14.8377	-8.6792	-18.0695	-10.0464	-8.78601	-16.0614	-15.2612	-8.06458
60.7	-5.56335	-2.81982	-14.8529	-8.64868	-18.042	-10.0403	-8.76648	-16.0431	-15.2685	-8.05664
60.8	-5.59692	-2.79236	-14.8315	-8.65784	-18.0511	-10.0555	-8.78601	-16.0455	-15.2588	-8.06519
60.9	-5.60913	-2.83508	-14.8651	-8.67004	-18.0267	-10.0525	-8.78967	-16.0419	-15.2508	-8.06213
61	-5.61218	-2.81677	-14.8407	-8.67004	-18.0267	-10.0525	-8.78235	-16.0645	-15.2576	-8.06396
61.1	-5.56641	-2.81677	-14.8407	-8.67004	-18.0298	-10.0494	-8.76953	-16.0565	-15.2515	-8.05603
61.2	-5.57556	-2.79846	-14.8285	-8.63953	-18.042	-10.0464	-8.77563	-16.0584	-15.2606	-8.05054
61.3	-5.56335	-2.81677	-14.8498	-8.67004	-18.0359	-10.0342	-8.76343	-16.0651	-15.2545	-8.0603
61.4	-5.59387	-2.79541	-14.8529	-8.66394	-18.0359	-10.0494	-8.77991	-16.0443	-15.2472	-8.06458
61.5	-5.58777	-2.82898	-14.8407	-8.64868	-17.9688	-10.0586	-8.77747	-16.0565	-15.271	-8.0481
61.6	-5.60303	-2.79236	-14.859	-8.66699	-18.045	-10.0494	-8.78174	-16.0913	-15.2612	-8.04565
61.7	-5.61218	-2.80762	-14.8529	-8.65784	-18.0115	-10.0525	-8.75671	-16.0596	-15.2539	-8.0426
61.8	-5.57861	-2.81982	-14.8377	-8.65173	-18.0206	-10.0525	-8.77808	-16.0608	-15.2722	-8.06335
61.9	-5.57861	-2.83813	-14.8438	-8.66394	-18.0237	-10.0494	-8.76953	-16.0773	-15.2545	-8.05054
62	-5.59082	-2.78931	-14.8438	-8.66699	-18.0695	-10.0342	-8.77075	-16.0559	-15.2582	-8.05298
62.1	-5.58777	-2.79846	-14.8498	-8.63647	-18.0359	-10.0342	-8.76648	-16.0626	-15.2582	-8.0481
62.2	-5.61218	-2.81982	-14.8377	-8.64258	-18.0267	-10.0403	-8.74512	-16.0608	-15.2484	-8.04321
62.3	-5.58167	-2.78931	-14.8468	-8.66089	-18.0481	-10.0281	-8.77075	-16.0553	-15.2704	-8.02917
62.4	-5.5603	-2.81067	-14.856	-8.63647	-18.0389	-10.0647	-8.77747	-16.0742	-15.2545	-8.02856
62.5	-5.58167	-2.81677	-14.8407	-8.64563	-18.0145	-10.0342	-8.76526	-16.0638	-15.2466	-8.0365
62.6	-5.55725	-2.80457	-14.8315	-8.64868	-18.0298	-10.0525	-8.75671	-16.0553	-15.257	-8.04871
62.7	-5.58777	-2.78931	-14.8407	-8.64868	-18.0389	-10.0433	-8.75854	-16.0877	-15.2557	-8.03467
62.8	-5.57861	-2.80457	-14.8621	-8.66394	-18.0359	-10.0403	-8.76221	-16.0614	-15.2466	-8.02979
62.9	-5.62134	-2.83508	-14.8377	-8.63037	-18.0633	-10.0311	-8.76099	-16.0663	-15.246	-8.03833
63	-5.55725	-2.80151	-14.8346	-8.64868	-18.0572	-10.0311	-8.74329	-16.0718	-15.2533	-8.03406
63.1	-5.61218	-2.79236	-14.8224	-8.63647	-18.0328	-10.0586	-8.75671	-16.0956	-15.2551	-8.02856
63.2	-5.58472	-2.80457	-14.8377	-8.65479	-18.0298	-10.0342	-8.7616	-16.0449	-15.2551	-8.04138
63.3	-5.58167	-2.78931	-14.856	-8.65479	-18.0389	-10.0403	-8.74817	-16.0773	-15.2539	-8.02063
63.4	-5.59998	-2.82593	-14.8438	-8.65173	-18.045	-10.0281	-8.75732	-16.0626	-15.2521	-8.03772
63.5	-5.58472	-2.79846	-14.8407	-8.63647	-18.0695	-10.025	-8.74023	-16.0614	-15.2588	-8.0426
63.6	-5.59692	-2.81982	-14.8102	-8.64563	-18.0328	-10.0433	-8.76221	-16.0626	-15.2527	-8.03589
63.7	-5.57556	-2.79541	-14.8315	-8.65173	-18.0481	-10.0494	-8.7439	-16.0742	-15.2447	-8.03223
63.8	-5.60303	-2.80762	-14.8315	-8.63647	-18.0359	-10.0311	-8.7561	-16.0791	-15.2496	-8.02856
63.9	-5.59692	-2.81677	-14.8224	-8.64868	-18.0481	-10.0189	-8.75671	-16.0675	-15.2399	-8.01575
64	-5.57861	-2.82593	-14.8407	-8.64563	-18.042	-10.0433	-8.75793	-16.0571	-15.2478	-8.03223
64.1	-5.5603	-2.80151	-14.8071	-8.64258	-18.0481	-10.0372	-8.74634	-16.0596	-15.257	-8.03955
64.2	-5.58472	-2.79846	-14.8377	-8.65173	-18.0359	-10.022	-8.7439	-16.0706	-15.2606	-8.02429
64.3	-5.59998	-2.78015	-14.8193	-8.63953	-18.0389	-10.0342	-8.73779	-16.0779	-15.2533	-8.02429
64.4	-5.58167	-2.81982	-14.8315	-8.62122	-18.042	-10.022	-8.73779	-16.0754	-15.2393	-8.01636
64.5	-5.59082	-2.80762	-14.8377	-8.63647	-18.0237	-10.0311	-8.74207	-16.0754	-15.2332	-8.02856
64.6	-5.57556	-2.81982	-14.8163	-8.63647	-18.0511	-10.0555	-8.7561	-16.0669	-15.2545	-8.02063
64.7	-5.62439	-2.79236	-14.8407	-8.63037	-18.042	-10.025	-8.74084	-16.0565	-15.2399	-8.02551
64.8	-5.56946	-2.81677	-14.8254	-8.62732	-18.0481	-10.0372	-8.74451	-16.0529	-15.2631	-8.01025
64.9	-5.58777	-2.80457	-14.8254	-8.63647	-18.0542	-10.0281	-8.74451	-16.0706	-15.2441	-8.02429
65	-5.57556	-2.79846	-14.8254	-8.63953	-18.0298	-10.0159	-8.73291	-16.0883	-15.2545	-8.02063
65.1	-5.57861	-2.81677	-14.8224	-8.64258	-18.0572	-10.0342	-8.74695	-16.0663	-15.249	-8.02002
65.2	-5.57861	-2.79846	-14.801	-8.64563	-18.0542	-10.0372	-8.75549	-16.0675	-15.2423	-8.01636
65.3	-5.58777	-2.80762	-14.8132	-8.62427	-18.0603	-10.0311	-8.74084	-16.0651	-15.2539	-8.01697
65.4	-5.59082	-2.80762	-14.8102	-8.61816	-18.0267	-10.0311	-8.74756	-16.062	-15.2484	-8.00354
65.5	-5.59998	-2.80762	-14.8163	-8.62427	-18.0725	-10.0311	-8.72864	-16.0602	-15.2325	-8.00964
65.6	-5.58777	-2.81067	-14.8193	-8.62427	-18.045	-10.022	-8.74268	-16.0547	-15.2283	-8.00781
65.7	-5.57861	-2.79236	-14.8071	-8.61511	-18.0359	-10.0494	-8.73291	-16.0712	-15.2435	-8.00293
65.8	-5.57861	-2.81372	-14.8346	-8.61816	-18.042	-9.99756	-8.73718	-16.0529	-15.2472	-8.01392
65.9	-5.58777	-2.80457	-14.8193	-8.61816	-18.0298	-10.0128	-8.71948	-16.062	-15.2466	-8.00659
66	-5.5603	-2.81677	-14.7919	-8.60596	-18.0633	-10.0159	-8.72986	-16.0638	-15.2521	-8.01392
66.1	-5.57861	-2.78931	-14.7949	-8.62732	-18.0664	-10.0281	-8.74207	-16.062	-15.238	-8.00232
66.2	-5.55725	-2.84424	-14.8102	-8.60901	-18.045	-10.0128	-8.74451	-16.0577	-15.2484	-8.01575
66.3	-5.57861	-2.7832	-14.8071	-8.63342	-18.0389	-10.0128	-8.72864	-16.0669	-15.2417	-8.01575
66.4	-5.58777	-2.79846	-14.798	-8.60596	-18.045	-10.0067	-8.74878	-16.0596	-15.2289	-7.99683
66.5	-5.58167	-2.81067	-14.7949	-8.61206	-18.0511	-10.0006	-8.72925	-16.0523	-15.2405	-7.99377
66.6	-5.56946	-2.80151	-14.7919	-8.61816	-18.0603	-10.025	-8.71826	-16.0663	-15.2313	-8.00415
66.7	-5.57251	-2.79541	-14.7919	-8.61511	-18.0633	-10.0128	-8.73657	-16.0834	-15.2472	-8.01147
66.8	-5.5542	-2.78625	-14.8163	-8.61816	-18.0633	-10.022	-8.75366	-16.0541	-15.2435	-8.00476
66.9	-5.58167	-2.78625	-14.7858	-8.61206	-18.0267	-10.0006	-8.71765	-16.0718	-15.235	-7.99988
67	-5.58167	-2.80762	-14.8132	-8.61816	-18.0695	-10.0067	-8.73352	-16.059	-15.2393	-8.00903
67.1	-5.59387	-2.80762	-14.801	-8.5907	-18.0542	-9.99756	-8.72314	-16.0638	-15.2368	-7.99377
67.2	-5.56946	-2.82288	-14.7919	-8.61511	-18.0176	-10.0098	-8.73718	-16.0736	-15.2502	-8.00598
67.3	-5.60608	-2.77405	-14.8071	-8.60291	-18.0481	-10.0281	-8.72192	-16.0602	-15.2283	-8.00293
67.4	-5.5542	-2.77405	-14.7919	-8.60291	-18.0633	-10.0098	-8.74329	-16.0748	-15.2155	-8.00293
67.5	-5.58472	-2.80151	-14.8041	-8.60901	-18.0695	-10.0128	-8.72986	-16.0529	-15.2332	-7.99316
67.6	-5.59082	-2.79541	-14.7797	-8.61206	-18.0542	-10.022	-8.72498	-16.0614	-15.2356	-7.99805
67.7	-5.55725	-2.79846	-14.798	-8.62427	-18.0328	-10.0098	-8.71643	-16.0602	-15.2191	-8.00354
67.8	-5.59998	-2.78931	-14.7949	-8.58459	-18.0695	-9.9762	-8.73291	-16.0651	-15.2429	-8.01941
67.9	-5.59387	-2.81372	-14.7766	-8.59985	-18.042	-10.0006	-8.73108	-16.0547	-15.2417	-7.99377
68	-5.56946	-2.771	-14.7919	-8.60291	-18.0359	-10.0006	-8.71704	-16.0651	-15.2325	-8.00232
68.1	-5.59082	-2.82288	-14.7919	-8.58154	-18.0542	-10.0006	-8.72192	-16.0736	-15.2466	-7.99744
68.2	-5.59082	-2.76184	-14.7858	-8.60596	-18.0481	-9.99146	-8.7262	-16.0846	-15.2435	-7.98645
68.3	-5.5603	-2.80151	-14.7827	-8.60596	-18.0359	-10.0128	-8.74268	-16.0516	-15.2338	-8.0127
68.4	-5.56641	-2.82593	-14.7949	-8.5968	-18.0481	-10.0037	-8.72681	-16.0571	-15.2264	-7.97852
68.5	-5.58167	-2.77405	-14.7797	-8.61206	-18.0542	-9.9823	-8.71948	-16.0651	-15.2496	-8.00415
68.6	-5.57556	-2.78625	-14.7858	-8.58154	-18.0511	-9.99756	-8.73413	-16.0626	-15.2338	-7.98767
68.7	-5.58472	-2.80457	-14.7766	-8.5907	-18.042	-9.99451	-8.71277	-16.0584	-15.2435	-7.99988
68.8	-5.58472	-2.78931	-14.7736	-8.61206	-18.045	-10.0098	-8.72742	-16.0675	-15.2411	-7.99255
68.9	-5.57861	-2.80151	-14.7827	-8.57849	-18.0603	-10.022	-8.7323	-16.0498	-15.2399	-7.98218
69	-5.59082	-2.79236	-14.7705	-8.60291	-18.0511	-10.0128	-8.71338	-16.0699	-15.2258	-7.98767
69.1	-5.56946	-2.81982	-14.8163	-8.59375	-18.0206	-10.0128	-8.73413	-16.0553	-15.2307	-7.995
69.2	-5.59692	-2.79846	-14.7858	-8.57544	-18.0298	-9.99451	-8.73169	-16.0736	-15.2496	-7.98584
69.3	-5.58167	-2.76489	-14.7858	-8.59375	-18.0511	-9.9823	-8.72498	-16.0669	-15.2332	-7.9895
69.4	-5.58472	-2.81982	-14.7614	-8.56934	-18.045	-10.0159	-8.72131	-16.0584	-15.2301	-7.97913
69.5	-5.57861	-2.80457	-14.7797	-8.57239	-18.0603	-10.0037	-8.7146	-16.0748	-15.224	-7.995
69.6	-5.59998	-2.76489	-14.7888	-8.58154	-18.045	-10.0006	-8.71643	-16.0474	-15.2441	-7.99194
69.7	-5.56335	-2.80457	-14.7736	-8.57849	-18.0572	-9.97925	-8.72253	-16.059	-15.2374	-7.97974
69.8	-5.59692	-2.79541	-14.7827	-8.59375	-18.0267	-9.97925	-8.72559	-16.062	-15.2399	-7.98584
69.9	-5.57556	-2.771	-14.7675	-8.57849	-18.0695	-9.99756	-8.74268	-16.0559	-15.2502	-7.9657
70	-5.59387	-2.7832	-14.7949	-8.60291	-18.0328	-10.0067	-8.70422	-16.0626	-15.2368	-7.97852
70.1	-5.58472	-2.79236	-14.7705	-8.57849	-18.0633	-10.0098	-8.72559	-16.062	-15.2313	-7.97974
70.2	-5.57251	-2.75574	-14.7858	-8.5968	-18.0572	-9.9884	-8.70667	-16.0474	-15.2344	-7.97974
70.3	-5.57251	-2.7771	-14.7827	-8.56323	-18.0511	-9.97009	-8.70972	-16.073	-15.2539	-7.97546
70.4	-5.59998	-2.7771	-14.8071	-8.58765	-18.0267	-9.9762	-8.71887	-16.0474	-15.2588	-7.96509
70.5	-5.57861	-2.81372	-14.7827	-8.56323	-18.0481	-9.9823	-8.70239	-16.0596	-15.2203	-7.98096
70.6	-5.57251	-2.7832	-14.7827	-8.56323	-18.0633	-9.99451	-8.72253	-16.0632	-15.2441	-7.99194
70.7	-5.60303	-2.79236	-14.7736	-8.57544	-18.0633	-9.98535	-8.70178	-16.0577	-15.2484	-7.98828
70.8	-5.58777	-2.77405	-14.7705	-8.56934	-18.042	-9.97009	-8.72986	-16.0779	-15.2539	-7.99255
70.9	-5.58472	-2.80457	-14.798	-8.57239	-18.0542	-9.9884	-8.71155	-16.04	-15.2319	-7.98096
71	-5.59998	-2.76794	-14.7919	-8.56628	-18.0633	-9.9823	-8.71826	-16.0577	-15.2325	-7.97241
71.1	-5.59387	-2.79236	-14.7797	-8.58154	-18.0359	-9.9762	-8.71643	-16.0449	-15.2386	-7.98584
71.2	-5.61218	-2.76184	-14.7888	-8.56934	-18.0695	-9.97314	-8.703	-16.0529	-15.2515	-7.9895
71.3	-5.58472	-2.7832	-14.7888	-8.56018	-18.0298	-9.96704	-8.7262	-16.0461	-15.2411	-7.96997
71.4	-5.58777	-2.76794	-14.8041	-8.58459	-18.0572	-10.0006	-8.71094	-16.0632	-15.2386	-7.99377
71.5	-5.60303	-2.80151	-14.7888	-8.56934	-18.0542	-9.96704	-8.72559	-16.0632	-15.2533	-7.98401
71.6	-5.5481	-2.79846	-14.7888	-8.57849	-18.0695	-9.9762	-8.70361	-16.0406	-15.2411	-7.96265
71.7	-5.59082	-2.7832	-14.7705	-8.57849	-18.0603	-10.0006	-8.70789	-16.0602	-15.26	-7.98767
71.8	-5.57556	-2.77405	-14.7888	-8.56323	-18.0603	-9.97925	-8.703	-16.0461	-15.2515	-7.97424
71.9	-5.59998	-2.78625	-14.7919	-8.57544	-18.0206	-9.96704	-8.70483	-16.0602	-15.2557	-7.98645
72	-5.58167	-2.79236	-14.7919	-8.56628	-18.0572	-9.96704	-8.69812	-16.0571	-15.2545	-7.97913
72.1	-5.58777	-2.79236	-14.798	-8.56934	-18.0695	-9.97314	-8.70911	-16.0461	-15.2441	-7.97791
72.2	-5.56335	-2.79236	-14.7858	-8.56934	-18.0511	-9.97925	-8.69202	-16.0523	-15.2533	-7.97424
72.3	-5.56946	-2.79846	-14.7827	-8.54797	-18.0603	-9.97925	-8.69385	-16.0504	-15.2429	-7.9834
72.4	-5.59387	-2.75574	-14.7949	-8.55713	-18.0389	-9.99451	-8.69873	-16.0443	-15.2496	-7.97729
72.5	-5.59998	-2.79541	-14.7888	-8.55713	-18.0664	-9.97314	-8.7085	-16.0657	-15.246	-7.98279
72.6	-5.58167	-2.7832	-14.7949	-8.56934	-18.0664	-9.96399	-8.69995	-16.0498	-15.2368	-7.98096
72.7	-5.57251	-2.74658	-14.7827	-8.55713	-18.045	-9.99451	-8.69873	-16.0718	-15.2624	-7.98218
72.8	-5.59998	-2.7771	-14.798	-8.55713	-18.0572	-9.9762	-8.68652	-16.0358	-15.2551	-7.98279
72.9	-5.59692	-2.7771	-14.7797	-8.55103	-18.0633	-9.9762	-8.70117	-16.0608	-15.2655	-7.99377
73	-5.57861	-2.78931	-14.7919	-8.53882	-18.0664	-9.95483	-8.70117	-16.0559	-15.2533	-7.96631
73.1	-5.58777	-2.77405	-14.7827	-8.56323	-18.0603	-9.98535	-8.68408	-16.051	-15.2606	-7.98096
73.2	-5.59082	-2.76184	-14.7797	-8.55103	-18.0725	-9.96704	-8.7146	-16.0584	-15.2508	-7.96875
73.3	-5.53894	-2.78015	-14.801	-8.54797	-18.0359	-9.9884	-8.69568	-16.0596	-15.246	-7.97424
73.4	-5.59082	-2.76489	-14.8071	-8.53577	-18.0633	-9.95789	-8.6853	-16.0449	-15.2563	-7.96204
73.5	-5.57861	-2.76489	-14.7766	-8.57239	-18.045	-9.97009	-8.71704	-16.0516	-15.2478	-7.98279
73.6	-5.60303	-2.80457	-14.7919	-8.54492	-18.0572	-9.96399	-8.68774	-16.0535	-15.2539	-7.96509
73.7	-5.58777	-2.75879	-14.7858	-8.54492	-18.042	-9.9823	-8.71277	-16.0541	-15.2521	-7.96753
73.8	-5.56335	-2.79236	-14.7858	-8.53577	-18.0481	-9.95178	-8.68713	-16.0535	-15.2655	-7.97485
73.9	-5.59998	-2.75269	-14.7919	-8.56018	-18.0695	-9.97009	-8.70117	-16.0577	-15.2606	-7.96448
74	-5.59692	-2.77405	-14.7797	-8.54797	-18.0359	-9.96094	-8.67676	-16.0504	-15.2515	-7.96265
74.1	-5.59387	-2.79236	-14.8041	-8.55103	-18.0786	-9.95178	-8.68835	-16.0608	-15.2588	-7.97058
74.2	-5.60303	-2.79541	-14.7827	-8.54187	-18.0542	-9.9884	-8.68408	-16.037	-15.246	-7.94861
74.3	-5.58472	-2.74658	-14.8163	-8.55408	-18.0481	-9.96094	-8.68774	-16.0553	-15.2582	-7.97729
74.4	-5.59387	-2.74963	-14.798	-8.55103	-18.0542	-9.94263	-8.69385	-16.0529	-15.2582	-7.96082
74.5	-5.58167	-2.76184	-14.7919	-8.54187	-18.0664	-9.94873	-8.69568	-16.0559	-15.2582	-7.98035
74.6	-5.58777	-2.78015	-14.7919	-8.52966	-18.0695	-9.9762	-8.69141	-16.0529	-15.2539	-7.96997
74.7	-5.60608	-2.78931	-14.7888	-8.55408	-18.0633	-9.95178	-8.70239	-16.0559	-15.2606	-7.97241
74.8	-5.59692	-2.79236	-14.8163	-8.53271	-18.045	-9.95178	-8.68713	-16.0632	-15.2612	-7.95776
74.9	-5.57556	-2.771	-14.7736	-8.56323	-18.0481	-9.96094	-8.6853	-16.0645	-15.2539	-7.95532
75	-5.59082	-2.78015	-14.8163	-8.53577	-18.0725	-9.93652	-8.69568	-16.0584	-15.2533	-7.96875
75.1	-5.56946	-2.77405	-14.798	-8.51746	-18.0633	-9.97009	-8.67249	-16.0669	-15.2679	-7.97119
75.2	-5.60303	-2.75269	-14.8102	-8.54187	-18.0389	-9.95483	-8.67004	-16.0608	-15.257	-7.95532
75.3	-5.59082	-2.78015	-14.7888	-8.54797	-18.0603	-9.97009	-8.6792	-16.062	-15.2612	-7.95105
75.4	-5.58777	-2.76794	-14.8071	-8.52356	-18.0725	-9.98535	-8.69263	-16.076	-15.2563	-7.94556
75.5	-5.58777	-2.76489	-14.798	-8.53271	-18.0511	-9.96399	-8.6908	-16.0474	-15.2533	-7.97852
75.6	-5.57251	-2.7771	-14.801	-8.54187	-18.0237	-9.95789	-8.6969	-16.0681	-15.2685	-7.95654
75.7	-5.56946	-2.7771	-14.7949	-8.51746	-18.0664	-9.94263	-8.67065	-16.0254	-15.2319	-7.94495
75.8	-5.59387	-2.79236	-14.801	-8.53577	-18.0695	-9.96094	-8.68225	-16.0565	-15.2649	-7.9364
75.9	-5.60913	-2.79846	-14.8346	-8.52966	-18.0511	-9.97314	-8.67615	-16.048	-15.246	-7.9657
76	-5.59387	-2.77405	-14.8132	-8.54492	-18.0603	-9.93347	-8.68896	-16.0474	-15.2545	-7.94495
76.1	-5.60303	-2.79236	-14.8041	-8.5144	-18.0756	-9.96399	-8.68652	-16.048	-15.2673	-7.93518
76.2	-5.58472	-2.76489	-14.7888	-8.5144	-18.0542	-9.94873	-8.68652	-16.0718	-15.2594	-7.95532
76.3	-5.59692	-2.771	-14.8041	-8.52356	-18.0481	-9.94263	-8.69507	-16.0632	-15.2557	-7.94617
76.4	-5.56335	-2.79541	-14.8132	-8.53271	-18.0878	-9.95483	-8.67981	-16.062	-15.2759	-7.94128
76.5	-5.57861	-2.76184	-14.8071	-8.5144	-18.0695	-9.96094	-8.66455	-16.0626	-15.2649	-7.9541
76.6	-5.57861	-2.76489	-14.8102	-8.52966	-18.0633	-9.91821	-8.67859	-16.0584	-15.2698	-7.94678
76.7	-5.60608	-2.7771	-14.8041	-8.53882	-18.0756	-9.96399	-8.67126	-16.0706	-15.2582	-7.93152
76.8	-5.58472	-2.75879	-14.8163	-8.52661	-18.0481	-9.94263	-8.68774	-16.0687	-15.2521	-7.93579
76.9	-5.59082	-2.75574	-14.8163	-8.50525	-18.0664	-9.97314	-8.68408	-16.0712	-15.2417	-7.93457
77	-5.55725	-2.78931	-14.7888	-8.5144	-18.0664	-9.95178	-8.66882	-16.0663	-15.2557	-7.9541
77.1	-5.60913	-2.79541	-14.801	-8.52051	-18.0328	-9.93958	-8.66638	-16.0602	-15.2472	-7.93884
77.2	-5.57251	-2.80457	-14.8132	-8.52966	-18.0664	-9.97009	-8.69019	-16.062	-15.2655	-7.94495
77.3	-5.57251	-2.76489	-14.798	-8.51135	-18.0786	-9.92737	-8.66882	-16.0748	-15.2576	-7.92847
77.4	-5.59082	-2.78015	-14.798	-8.52051	-18.0664	-9.94568	-8.67371	-16.0821	-15.2545	-7.93274
77.5	-5.56946	-2.79236	-14.7949	-8.52661	-18.0847	-9.93958	-8.67493	-16.059	-15.2576	-7.94128
77.6	-5.56946	-2.76184	-14.8071	-8.52051	-18.0603	-9.93042	-8.66577	-16.0681	-15.2447	-7.94128
77.7	-5.59082	-2.76489	-14.7919	-8.51746	-18.0481	-9.93958	-8.68225	-16.0821	-15.2502	-7.93701
77.8	-5.55725	-2.78015	-14.8346	-8.51135	-18.0664	-9.95178	-8.65967	-16.062	-15.2478	-7.92236
77.9	-5.59692	-2.75269	-14.7888	-8.51746	-18.0572	-9.91821	-8.65906	-16.0846	-15.2582	-7.93274
78	-5.57861	-2.78625	-14.8071	-8.50525	-18.0664	-9.93347	-8.66638	-16.0632	-15.2484	-7.93579
78.1	-5.61523	-2.80457	-14.8041	-8.51135	-18.0786	-9.94873	-8.66394	-16.0718	-15.2557	-7.92297
78.2	-5.59692	-2.74658	-14.8071	-8.49609	-18.0695	-9.97009	-8.67065	-16.0773	-15.2399	-7.9425
78.3	-5.56946	-2.76489	-14.7888	-8.52661	-18.0542	-9.93347	-8.66699	-16.062	-15.2533	-7.92847
78.4	-5.59387	-2.76184	-14.8285	-8.49304	-18.0572	-9.93652	-8.66272	-16.0742	-15.2673	-7.92603
78.5	-5.58472	-2.73743	-14.798	-8.49915	-18.0572	-9.93042	-8.66638	-16.0821	-15.2563	-7.93213
78.6	-5.5542	-2.7832	-14.798	-8.49915	-18.0664	-9.95178	-8.65417	-16.0687	-15.2454	-7.92908
78.7	-5.61218	-2.7832	-14.7949	-8.49304	-18.0756	-9.94263	-8.64319	-16.087	-15.2521	-7.92664
78.8	-5.56946	-2.74353	-14.7949	-8.51746	-18.0481	-9.93042	-8.66821	-16.0748	-15.2454	-7.91199
78.9	-5.60303	-2.79541	-14.798	-8.49609	-18.042	-9.93958	-8.64258	-16.0675	-15.26	-7.92603
79	-5.59387	-2.76184	-14.7888	-8.49915	-18.0969	-9.94873	-8.65601	-16.0919	-15.2338	-7.9187
79.1	-5.5603	-2.78015	-14.8071	-8.48694	-18.0633	-9.92737	-8.6676	-16.0467	-15.2606	-7.93579
79.2	-5.56335	-2.76794	-14.7736	-8.5022	-18.0725	-9.94263	-8.65601	-16.0773	-15.2521	-7.91321
79.3	-5.57251	-2.73438	-14.7858	-8.48999	-18.0756	-9.93347	-8.6554	-16.0797	-15.2612	-7.91077
79.4	-5.59998	-2.78015	-14.8132	-8.50525	-18.0633	-9.92432	-8.64868	-16.0883	-15.2515	-7.92969
79.5	-5.59692	-2.75879	-14.7766	-8.49304	-18.042	-9.90906	-8.64563	-16.0785	-15.2643	-7.93091
79.6	-5.57556	-2.7771	-14.7797	-8.48083	-18.0725	-9.95483	-8.64624	-16.0785	-15.26	-7.92175
79.7	-5.59692	-2.7832	-14.7827	-8.5144	-18.0633	-9.93042	-8.64014	-16.0956	-15.2515	-7.90283
79.8	-5.55115	-2.77405	-14.7919	-8.49915	-18.0786	-9.92737	-8.65723	-16.0895	-15.2667	-7.92542
79.9	-5.60303	-2.76794	-14.7827	-8.48083	-18.0756	-9.91211	-8.65723	-16.0834	-15.249	-7.9071
80	-5.56641	-2.7832	-14.7675	-8.5083	-18.0969	-9.92737	-8.64868	-16.0992	-15.2582	-7.9126
80.1	-5.59082	-2.74963	-14.7919	-8.49915	-18.045	-9.92737	-8.64502	-16.0809	-15.2399	-7.89978
80.2	-5.57556	-2.77405	-14.7858	-8.5022	-18.0572	-9.91516	-8.63525	-16.073	-15.249	-7.90833
80.3	-5.57861	-2.76184	-14.7919	-8.49304	-18.0603	-9.93347	-8.66272	-16.0773	-15.2594	-7.90283
80.4	-5.59692	-2.76794	-14.7736	-8.49609	-18.0542	-9.92432	-8.62183	-16.0693	-15.2502	-7.89368
80.5	-5.57556	-2.75269	-14.7614	-8.49304	-18.0817	-9.8999	-8.6377	-16.098	-15.2344	-7.92175
80.6	-5.57556	-2.77405	-14.7797	-8.51746	-18.0756	-9.93958	-8.63464	-16.0901	-15.2313	-7.90527
80.7	-5.61218	-2.78931	-14.7339	-8.48999	-18.0359	-9.94568	-8.64075	-16.0803	-15.2539	-7.90222
80.8	-5.58167	-2.74963	-14.7675	-8.48694	-18.0969	-9.91211	-8.63647	-16.0895	-15.2295	-7.91321
80.9	-5.59998	-2.78625	-14.7705	-8.49304	-18.0786	-9.91821	-8.64441	-16.073	-15.2673	-7.89124
81	-5.58167	-2.78625	-14.7705	-8.48083	-18.0542	-9.92126	-8.63342	-16.0877	-15.2319	-7.90588
81.1	-5.57556	-2.7771	-14.7766	-8.49609	-18.0572	-9.90601	-8.64929	-16.0944	-15.2374	-7.89063
81.2	-5.60913	-2.771	-14.7705	-8.5022	-18.0847	-9.88464	-8.6261	-16.0693	-15.2454	-7.90771
81.3	-5.57251	-2.77405	-14.743	-8.49304	-18.0664	-9.90906	-8.64075	-16.0907	-15.238	-7.90894
81.4	-5.58167	-2.7832	-14.7797	-8.46252	-18.0511	-9.93652	-8.64685	-16.0815	-15.2472	-7.91199
81.5	-5.60608	-2.79236	-14.7705	-8.47778	-18.0908	-9.91821	-8.63892	-16.0712	-15.2374	-7.89124
81.6	-5.56946	-2.73132	-14.7522	-8.47778	-18.0328	-9.93347	-8.64563	-16.0767	-15.2417	-7.89673
81.7	-5.58777	-2.78931	-14.7705	-8.5022	-18.045	-9.91211	-8.64014	-16.0821	-15.246	-7.90039
81.8	-5.61218	-2.76489	-14.7888	-8.47473	-18.0725	-9.91516	-8.62427	-16.0687	-15.2338	-7.901
81.9	-5.60303	-2.7832	-14.7583	-8.47473	-18.0603	-9.91211	-8.64197	-16.0944	-15.2234	-7.89368
82	-5.56641	-2.76794	-14.7614	-8.48999	-18.0664	-9.89685	-8.63159	-16.0638	-15.2332	-7.901
82.1	-5.59692	-2.771	-14.7492	-8.47473	-18.0572	-9.94263	-8.63037	-16.0913	-15.2447	-7.88879
82.2	-5.60303	-2.77405	-14.7675	-8.46863	-18.0572	-9.89685	-8.62915	-16.0785	-15.2386	-7.88696
82.3	-5.59082	-2.75269	-14.74	-8.48389	-18.0725	-9.91211	-8.63647	-16.0864	-15.2271	-7.88269
82.4	-5.57861	-2.76489	-14.7675	-8.47778	-18.042	-9.92432	-8.63831	-16.0821	-15.2429	-7.89307
82.5	-5.57251	-2.76794	-14.7339	-8.48999	-18.0633	-9.90906	-8.62305	-16.0754	-15.2374	-7.88269
82.6	-5.59082	-2.80762	-14.7461	-8.47778	-18.0695	-9.92432	-8.63464	-16.0669	-15.2472	-7.89673
82.7	-5.57861	-2.78015	-14.7553	-8.48999	-18.045	-9.90906	-8.61511	-16.0944	-15.2447	-7.88086
82.8	-5.57556	-2.77405	-14.7278	-8.48083	-18.0511	-9.92432	-8.64136	-16.084	-15.2307	-7.88513
82.9	-5.57556	-2.76184	-14.7553	-8.48694	-18.0786	-9.8938	-8.62549	-16.0809	-15.2576	-7.87354
83	-5.5603	-2.7771	-14.6973	-8.47473	-18.0633	-9.90601	-8.60474	-16.0681	-15.2405	-7.8949
83.1	-5.59082	-2.74353	-14.7614	-8.47168	-18.0511	-9.90295	-8.62793	-16.0754	-15.2466	-7.87903
83.2	-5.55725	-2.7771	-14.7339	-8.46863	-18.0542	-9.91821	-8.6145	-16.0821	-15.2271	-7.87292
83.3	-5.58777	-2.77405	-14.7217	-8.46863	-18.0633	-9.91821	-8.62122	-16.0663	-15.2252	-7.88757
83.4	-5.58777	-2.74658	-14.7278	-8.47168	-18.0756	-9.8999	-8.60413	-16.0797	-15.2399	-7.86926
83.5	-5.56946	-2.7771	-14.7461	-8.48389	-18.0633	-9.90295	-8.63342	-16.0645	-15.2307	-7.88025
83.6	-5.55725	-2.77405	-14.7247	-8.47473	-18.0603	-9.89685	-8.6145	-16.0797	-15.2307	-7.87292
83.7	-5.59082	-2.76184	-14.7461	-8.46863	-18.0237	-9.8877	-8.62488	-16.0681	-15.221	-7.88086
83.8	-5.57251	-2.77405	-14.7339	-8.46252	-18.0603	-9.91821	-8.62793	-16.0754	-15.2222	-7.89612
83.9	-5.57556	-2.7832	-14.7186	-8.46863	-18.0817	-9.90906	-8.61938	-16.0852	-15.2173	-7.87231
84	-5.60608	-2.78931	-14.7492	-8.44421	-18.0633	-9.89685	-8.62061	-16.062	-15.2478	-7.88269
84.1	-5.56335	-2.77405	-14.7339	-8.45337	-18.0603	-9.90295	-8.62122	-16.0736	-15.2216	-7.87292
84.2	-5.57861	-2.771	-14.7308	-8.47473	-18.0695	-9.90906	-8.62061	-16.0834	-15.2319	-7.87537
84.3	-5.60913	-2.80151	-14.7369	-8.45947	-18.0603	-9.90601	-8.61267	-16.0699	-15.2429	-7.86621
84.4	-5.59998	-2.76489	-14.7308	-8.45947	-18.0511	-9.89075	-8.62122	-16.0889	-15.2472	-7.87415
84.5	-5.58777	-2.77405	-14.74	-8.46252	-18.0633	-9.88159	-8.60535	-16.0858	-15.2289	-7.87659
84.6	-5.60303	-2.74353	-14.7186	-8.45642	-18.0756	-9.91516	-8.61267	-16.0681	-15.2362	-7.88757
84.7	-5.58777	-2.7771	-14.7125	-8.47473	-18.0511	-9.8999	-8.61389	-16.0596	-15.2203	-7.88269
84.8	-5.56335	-2.75879	-14.7278	-8.45032	-18.0481	-9.90295	-8.60962	-16.0785	-15.2405	-7.8772
84.9	-5.59387	-2.75879	-14.7125	-8.44421	-18.0298	-9.8938	-8.61633	-16.0736	-15.2411	-7.88757
85	-5.60303	-2.76489	-14.7186	-8.47473	-18.0572	-9.89075	-8.61511	-16.0931	-15.2319	-7.89063
85.1	-5.55115	-2.76184	-14.7278	-8.43506	-18.0725	-9.88464	-8.61328	-16.0669	-15.2161	-7.88452
85.2	-5.61523	-2.7771	-14.7247	-8.45337	-18.0756	-9.87854	-8.60352	-16.0718	-15.2289	-7.87842
85.3	-5.56946	-2.771	-14.7247	-8.45947	-18.0664	-9.89075	-8.60596	-16.0577	-15.2368	-7.88147
85.4	-5.60303	-2.75269	-14.7247	-8.45337	-18.0664	-9.90601	-8.60901	-16.0791	-15.2417	-7.88452
85.5	-5.58777	-2.78015	-14.7156	-8.44116	-18.0695	-9.89075	-8.61389	-16.0645	-15.2332	-7.88086
85.6	-5.58777	-2.78015	-14.7034	-8.43811	-18.0267	-9.87549	-8.59436	-16.0681	-15.2307	-7.86804
85.7	-5.57556	-2.74658	-14.7339	-8.45337	-18.0756	-9.90601	-8.60962	-16.0791	-15.2283	-7.88635
85.8	-5.59082	-2.74353	-14.7247	-8.45642	-18.0695	-9.88464	-8.59558	-16.0443	-15.2423	-7.8656
85.9	-5.58167	-2.78015	-14.7278	-8.45947	-18.0664	-9.90906	-8.59924	-16.073	-15.2466	-7.87231
86	-5.56946	-2.74963	-14.7156	-8.45337	-18.0389	-9.8877	-8.61206	-16.0602	-15.2338	-7.87476
86.1	-5.55725	-2.78931	-14.7034	-8.46252	-18.0664	-9.88159	-8.5907	-16.0638	-15.2277	-7.8717
86.2	-5.59082	-2.76184	-14.7308	-8.44116	-18.0603	-9.88464	-8.61328	-16.0736	-15.2295	-7.854
86.3	-5.58472	-2.76489	-14.7278	-8.43506	-18.0786	-9.90601	-8.60901	-16.0712	-15.2319	-7.87231
86.4	-5.58777	-2.76184	-14.7064	-8.45642	-18.0511	-9.87549	-8.60291	-16.0596	-15.2319	-7.85889
86.5	-5.55725	-2.75574	-14.7308	-8.43201	-18.1061	-9.89685	-8.59558	-16.0584	-15.2313	-7.87415
86.6	-5.57861	-2.74963	-14.7217	-8.43506	-18.0359	-9.8999	-8.60046	-16.0736	-15.2271	-7.86133
86.7	-5.56946	-2.79236	-14.7247	-8.43506	-18.0756	-9.86328	-8.5907	-16.0553	-15.2374	-7.85889
86.8	-5.57861	-2.73438	-14.743	-8.43201	-18.0603	-9.86938	-8.60291	-16.0651	-15.2277	-7.86438
86.9	-5.57556	-2.74658	-14.7278	-8.45642	-18.0695	-9.88159	-8.59924	-16.0571	-15.2277	-7.85278
87	-5.56335	-2.76489	-14.7125	-8.42285	-18.0695	-9.89075	-8.59741	-16.0736	-15.2197	-7.85828
87.1	-5.56946	-2.76794	-14.7095	-8.43506	-18.0664	-9.87854	-8.61206	-16.0449	-15.235	-7.87415
87.2	-5.57556	-2.75879	-14.7217	-8.42285	-18.0786	-9.86023	-8.60107	-16.0712	-15.2362	-7.86499
87.3	-5.56335	-2.75879	-14.7034	-8.43201	-18.0511	-9.87549	-8.61511	-16.0632	-15.2197	-7.87354
87.4	-5.56946	-2.75879	-14.7186	-8.42896	-18.0756	-9.87854	-8.59314	-16.051	-15.2478	-7.86011
87.5	-5.57556	-2.75269	-14.7308	-8.44116	-18.0633	-9.87244	-8.61511	-16.0681	-15.2423	-7.86865
87.6	-5.57861	-2.75879	-14.7156	-8.42896	-18.0786	-9.84802	-8.60168	-16.0577	-15.2338	-7.84912
87.7	-5.57251	-2.75574	-14.7247	-8.43506	-18.0817	-9.88159	-8.59863	-16.048	-15.2429	-7.87415
87.8	-5.58167	-2.74658	-14.7064	-8.41064	-18.0695	-9.87244	-8.60657	-16.0492	-15.2502	-7.87354
87.9	-5.59387	-2.75879	-14.7064	-8.42896	-18.0511	-9.86328	-8.60657	-16.0577	-15.2252	-7.88818
88	-5.58472	-2.771	-14.7217	-8.43506	-18.0847	-9.89075	-8.60168	-16.0492	-15.2405	-7.86743
88.1	-5.55725	-2.74658	-14.7278	-8.43811	-18.0511	-9.86023	-8.59924	-16.0504	-15.2393	-7.8595
88.2	-5.5542	-2.74658	-14.7217	-8.41675	-18.0695	-9.87244	-8.58398	-16.0602	-15.2441	-7.8656
88.3	-5.57251	-2.74963	-14.7125	-8.41675	-18.045	-9.86328	-8.59497	-16.0602	-15.235	-7.86011
88.4	-5.58472	-2.76184	-14.7247	-8.40149	-18.0359	-9.87244	-8.60168	-16.0547	-15.2307	-7.86865
88.5	-5.58167	-2.77405	-14.7217	-8.4259	-18.0572	-9.87549	-8.59558	-16.0449	-15.2368	-7.85889
88.6	-5.57251	-2.75574	-14.7217	-8.4137	-18.0572	-9.86938	-8.60474	-16.0638	-15.2417	-7.84973
88.7	-5.59387	-2.74048	-14.7247	-8.42285	-18.0481	-9.86633	-8.59131	-16.0406	-15.2393	-7.85583
88.8	-5.56335	-2.75269	-14.7217	-8.40149	-18.0511	-9.87244	-8.5907	-16.0663	-15.2338	-7.86072
88.9	-5.56946	-2.79846	-14.7247	-8.41675	-18.045	-9.87854	-8.60779	-16.0461	-15.2551	-7.85217
89	-5.58167	-2.75574	-14.7308	-8.4198	-18.045	-9.88159	-8.57849	-16.0645	-15.2399	-7.86804
89.1	-5.58472	-2.76794	-14.7034	-8.41064	-18.0756	-9.85107	-8.59131	-16.0809	-15.246	-7.85706
89.2	-5.57251	-2.72827	-14.7369	-8.42896	-18.0939	-9.85107	-8.60291	-16.037	-15.2435	-7.86316
89.3	-5.57251	-2.72522	-14.7064	-8.40149	-18.0695	-9.8999	-8.61145	-16.0785	-15.2563	-7.86987
89.4	-5.58777	-2.74048	-14.7369	-8.41064	-18.0511	-9.86328	-8.58582	-16.0419	-15.2466	-7.85767
89.5	-5.56946	-2.76184	-14.7308	-8.42285	-18.0542	-9.86023	-8.5968	-16.0492	-15.2478	-7.85156
89.6	-5.58167	-2.72217	-14.7369	-8.4198	-18.0756	-9.87244	-8.59009	-16.0461	-15.2399	-7.86072
89.7	-5.57861	-2.78015	-14.7186	-8.41064	-18.0389	-9.85718	-8.60413	-16.0687	-15.246	-7.86499
89.8	-5.57861	-2.771	-14.7339	-8.41675	-18.0572	-9.86938	-8.58154	-16.0565	-15.2521	-7.85217
89.9	-5.58167	-2.74658	-14.7461	-8.40454	-18.0695	-9.84802	-8.60229	-16.0553	-15.2386	-7.87354
90	-5.59998	-2.75269	-14.6912	-8.41064	-18.0633	-9.87549	-8.58765	-16.0541	-15.2502	-7.85767
90.1	-5.58167	-2.76794	-14.7461	-8.4137	-18.0328	-9.88464	-8.60229	-16.0523	-15.2356	-7.85645
90.2	-5.59082	-2.73438	-14.7308	-8.4137	-18.042	-9.84802	-8.5907	-16.0584	-15.2527	-7.85706
90.3	-5.59082	-2.76184	-14.7125	-8.40759	-18.0878	-9.86328	-8.59802	-16.0535	-15.2399	-7.85217
90.4	-5.58167	-2.74658	-14.7125	-8.39844	-18.0695	-9.85718	-8.59314	-16.0608	-15.2435	-7.86133
90.5	-5.5542	-2.74353	-14.7247	-8.41675	-18.0328	-9.86938	-8.60229	-16.0614	-15.2399	-7.86316
90.6	-5.57861	-2.76184	-14.7125	-8.41675	-18.0572	-9.84497	-8.58398	-16.0577	-15.2496	-7.84363
90.7	-5.56946	-2.75574	-14.7247	-8.38928	-18.0725	-9.85413	-8.60168	-16.0565	-15.2551	-7.85645
90.8	-5.58777	-2.73132	-14.7156	-8.4137	-18.045	-9.87244	-8.57361	-16.0596	-15.2374	-7.85645
90.9	-5.61218	-2.76794	-14.7369	-8.38928	-18.0664	-9.85107	-8.56689	-16.0358	-15.2521	-7.85583
91	-5.59692	-2.71912	-14.743	-8.40759	-18.0511	-9.86328	-8.57849	-16.0565	-15.2441	-7.85828
91.1	-5.58167	-2.78015	-14.7369	-8.4137	-18.0542	-9.85413	-8.57971	-16.0547	-15.235	-7.83875
91.2	-5.57251	-2.73743	-14.74	-8.38623	-18.0664	-9.85413	-8.5968	-16.0663	-15.2447	-7.84363
91.3	-5.59387	-2.74353	-14.7675	-8.40759	-18.045	-9.85413	-8.59863	-16.0645	-15.2362	-7.84668
91.4	-5.56641	-2.73438	-14.74	-8.41064	-18.0695	-9.85413	-8.57605	-16.0651	-15.2399	-7.8302
91.5	-5.60303	-2.74658	-14.74	-8.38623	-18.0511	-9.87854	-8.58459	-16.0455	-15.2393	-7.85583
91.6	-5.57861	-2.75269	-14.7369	-8.39539	-18.0572	-9.83582	-8.5968	-16.0577	-15.2338	-7.83569
91.7	-5.57861	-2.74353	-14.7461	-8.38928	-18.0359	-9.84192	-8.58215	-16.0559	-15.2515	-7.85156
91.8	-5.57251	-2.75574	-14.7583	-8.38623	-18.0786	-9.85413	-8.5907	-16.0474	-15.2301	-7.84485
91.9	-5.58777	-2.74658	-14.7492	-8.39233	-18.0756	-9.85107	-8.57544	-16.0565	-15.2435	-7.8479
92	-5.57556	-2.76489	-14.7583	-8.37708	-18.0511	-9.87854	-8.56567	-16.0651	-15.2405	-7.85339
92.1	-5.58472	-2.74048	-14.7614	-8.38623	-18.0633	-9.84192	-8.60229	-16.0645	-15.2429	-7.85156
92.2	-5.5542	-2.76184	-14.7156	-8.37708	-18.0756	-9.82971	-8.57239	-16.0669	-15.2441	-7.84119
92.3	-5.59692	-2.74658	-14.7522	-8.38318	-18.0481	-9.86633	-8.57422	-16.0553	-15.238	-7.85034
92.4	-5.59082	-2.75574	-14.743	-8.38928	-18.0633	-9.85718	-8.57178	-16.0584	-15.2283	-7.85645
92.5	-5.59387	-2.76184	-14.7461	-8.39844	-18.0664	-9.85413	-8.58154	-16.0626	-15.2356	-7.82776
92.6	-5.57251	-2.74963	-14.7461	-8.39844	-18.0725	-9.86328	-8.56018	-16.0541	-15.2374	-7.8479
92.7	-5.56946	-2.75879	-14.7583	-8.38318	-18.0481	-9.85107	-8.58032	-16.0596	-15.2521	-7.83142
92.8	-5.58777	-2.75879	-14.7553	-8.37402	-18.0511	-9.83582	-8.58093	-16.0516	-15.2338	-7.83386
92.9	-5.59387	-2.74353	-14.7675	-8.38623	-18.0756	-9.83887	-8.57605	-16.0645	-15.2496	-7.85278
93	-5.57861	-2.73743	-14.7492	-8.40149	-18.045	-9.86023	-8.56262	-16.0651	-15.2484	-7.83142
93.1	-5.58777	-2.73132	-14.7217	-8.37097	-18.0572	-9.83276	-8.56995	-16.0535	-15.2435	-7.82837
93.2	-5.56641	-2.76794	-14.7553	-8.37097	-18.0572	-9.84802	-8.56445	-16.0651	-15.235	-7.84119
93.3	-5.5481	-2.76184	-14.7369	-8.38318	-18.0603	-9.83276	-8.57117	-16.0724	-15.2386	-7.8302
93.4	-5.60913	-2.73438	-14.7583	-8.38013	-18.0572	-9.85107	-8.58765	-16.0638	-15.2472	-7.83447
93.5	-5.59998	-2.75269	-14.7278	-8.37402	-18.0664	-9.86938	-8.56262	-16.0651	-15.2307	-7.8363
93.6	-5.59998	-2.74353	-14.7522	-8.35876	-18.0389	-9.84802	-8.56323	-16.0651	-15.2356	-7.82715
93.7	-5.58777	-2.76489	-14.743	-8.38318	-18.0908	-9.83582	-8.56384	-16.0669	-15.2393	-7.83508
93.8	-5.58472	-2.75879	-14.7461	-8.36792	-18.0511	-9.82056	-8.5614	-16.0681	-15.2478	-7.82837
93.9	-5.59998	-2.74963	-14.7461	-8.37097	-18.045	-9.8175	-8.55164	-16.0669	-15.2307	-7.82227
94	-5.58777	-2.72827	-14.7675	-8.36487	-18.0603	-9.83276	-8.58215	-16.062	-15.249	-7.81921
94.1	-5.57861	-2.75879	-14.7492	-8.38013	-18.0603	-9.85413	-8.55957	-16.0754	-15.2496	-7.8302
94.2	-5.58472	-2.72217	-14.743	-8.36792	-18.042	-9.83887	-8.55713	-16.0669	-15.2508	-7.8363
94.3	-5.57861	-2.75269	-14.7583	-8.34656	-18.0786	-9.82666	-8.56873	-16.062	-15.2362	-7.82776
94.4	-5.57861	-2.74963	-14.7186	-8.37708	-18.042	-9.85718	-8.54614	-16.0742	-15.2289	-7.82043
94.5	-5.56641	-2.73438	-14.7644	-8.38013	-18.042	-9.83276	-8.56934	-16.073	-15.2222	-7.82166
94.6	-5.59692	-2.73438	-14.7125	-8.38013	-18.0511	-9.8053	-8.55591	-16.0657	-15.2368	-7.80823
94.7	-5.57861	-2.75574	-14.7369	-8.38013	-18.0481	-9.85413	-8.55591	-16.0803	-15.2313	-7.82776
94.8	-5.56335	-2.7771	-14.7461	-8.35876	-18.0664	-9.84802	-8.5614	-16.0681	-15.257	-7.81555
94.9	-5.57556	-2.74353	-14.743	-8.34961	-18.0511	-9.83887	-8.55286	-16.073	-15.246	-7.81982
95	-5.60913	-2.74658	-14.7278	-8.35876	-18.0572	-9.8175	-8.5437	-16.0797	-15.2417	-7.81555
95.1	-5.56946	-2.73132	-14.7308	-8.36487	-18.0298	-9.84497	-8.56018	-16.0706	-15.2368	-7.81555
95.2	-5.58777	-2.73743	-14.7461	-8.36792	-18.0572	-9.83887	-8.55713	-16.0785	-15.2478	-7.82288
95.3	-5.55725	-2.7832	-14.74	-8.36792	-18.045	-9.83582	-8.54919	-16.0651	-15.2478	-7.81494
95.4	-5.60303	-2.73743	-14.7125	-8.36182	-18.0389	-9.85413	-8.54736	-16.0632	-15.2466	-7.81799
95.5	-5.58167	-2.78625	-14.7247	-8.34656	-18.0328	-9.8175	-8.53943	-16.0748	-15.2283	-7.82349
95.6	-5.57556	-2.75269	-14.7339	-8.36792	-18.0633	-9.80835	-8.55713	-16.0754	-15.2332	-7.81616
95.7	-5.59082	-2.75574	-14.7461	-8.35266	-18.0603	-9.83582	-8.54431	-16.0779	-15.2441	-7.82349
95.8	-5.57556	-2.74963	-14.7156	-8.34961	-18.042	-9.84497	-8.54248	-16.0657	-15.2344	-7.80884
95.9	-5.59692	-2.76184	-14.7339	-8.36487	-18.0603	-9.83582	-8.54553	-16.0614	-15.2271	-7.80334
96	-5.57861	-2.75269	-14.7308	-8.34656	-18.0389	-9.82361	-8.55286	-16.0803	-15.2508	-7.81433
96.1	-5.57251	-2.73438	-14.7186	-8.35876	-18.0572	-9.82056	-8.54919	-16.0736	-15.246	-7.80884
96.2	-5.56335	-2.73438	-14.7186	-8.34961	-18.0633	-9.82361	-8.52478	-16.076	-15.2252	-7.80334
96.3	-5.5542	-2.74963	-14.7278	-8.34351	-18.042	-9.84497	-8.54858	-16.0992	-15.2295	-7.81677
96.4	-5.61218	-2.73438	-14.7095	-8.35876	-18.0664	-9.82056	-8.54248	-16.0529	-15.2515	-7.82532
96.5	-5.56641	-2.75269	-14.7278	-8.35571	-18.0572	-9.82971	-8.53943	-16.076	-15.2454	-7.79541
96.6	-5.58777	-2.75269	-14.7369	-8.35266	-18.0633	-9.81445	-8.52356	-16.0608	-15.2289	-7.81433
96.7	-5.59998	-2.75879	-14.6942	-8.36182	-18.0542	-9.84497	-8.55042	-16.0791	-15.2283	-7.79663
96.8	-5.58167	-2.74658	-14.743	-8.36487	-18.0237	-9.82361	-8.53088	-16.0638	-15.2094	-7.80884
96.9	-5.59082	-2.75269	-14.7095	-8.34351	-18.0572	-9.8114	-8.52295	-16.0724	-15.238	-7.80029
97	-5.57861	-2.73743	-14.7186	-8.36487	-18.0664	-9.83582	-8.54004	-16.0864	-15.2222	-7.79419
97.1	-5.57861	-2.74048	-14.7064	-8.35266	-18.0542	-9.79309	-8.53699	-16.0773	-15.2332	-7.80151
97.2	-5.59082	-2.74658	-14.7064	-8.36182	-18.042	-9.82056	-8.52539	-16.0742	-15.2295	-7.80151
97.3	-5.59387	-2.72827	-14.7217	-8.35876	-18.0511	-9.82056	-8.53271	-16.0809	-15.2307	-7.79541
97.4	-5.57251	-2.76489	-14.6973	-8.34656	-18.0481	-9.8053	-8.52661	-16.0791	-15.2307	-7.79846
97.5	-5.61218	-2.75879	-14.7064	-8.34045	-18.045	-9.83887	-8.55225	-16.0785	-15.2319	-7.8009
97.6	-5.57861	-2.75879	-14.6881	-8.35571	-18.0695	-9.8114	-8.52173	-16.0742	-15.2142	-7.7948
97.7	-5.57861	-2.7832	-14.7095	-8.36487	-18.0481	-9.82056	-8.526	-16.0846	-15.2393	-7.79053
97.8	-5.59998	-2.73438	-14.7034	-8.33435	-18.0664	-9.8114	-8.52783	-16.0614	-15.2338	-7.79114
97.9	-5.56335	-2.78015	-14.6973	-8.34351	-18.0328	-9.81445	-8.5199	-16.0986	-15.2344	-7.79785
98	-5.58167	-2.73743	-14.6851	-8.34045	-18.042	-9.82361	-8.52173	-16.059	-15.2362	-7.78381
98.1	-5.59692	-2.76184	-14.6881	-8.34351	-18.0786	-9.83276	-8.52295	-16.0852	-15.2295	-7.78809
98.2	-5.59998	-2.75269	-14.7156	-8.3374	-18.0481	-9.78088	-8.51074	-16.0815	-15.2283	-7.8009
98.3	-5.59387	-2.76489	-14.7125	-8.34961	-18.0298	-9.82056	-8.526	-16.0748	-15.2191	-7.80029
98.4	-5.56641	-2.74963	-14.7003	-8.3374	-18.0572	-9.8114	-8.52478	-16.0931	-15.2191	-7.77832
98.5	-5.58472	-2.75879	-14.7125	-8.34656	-18.0633	-9.81445	-8.53577	-16.0931	-15.2319	-7.78809
98.6	-5.58777	-2.73743	-14.7034	-8.32825	-18.0481	-9.8175	-8.53638	-16.0706	-15.2185	-7.78992
98.7	-5.59692	-2.74963	-14.7003	-8.3374	-18.0633	-9.81445	-8.5321	-16.0748	-15.2271	-7.78931
98.8	-5.59387	-2.771	-14.7217	-8.3374	-18.0542	-9.79309	-8.5144	-16.0791	-15.2203	-7.76978
98.9	-5.58167	-2.73132	-14.6942	-8.3252	-18.0633	-9.8114	-8.5199	-16.0602	-15.2222	-7.79663
99	-5.58167	-2.771	-14.6973	-8.33435	-18.0359	-9.78699	-8.50647	-16.0681	-15.2289	-7.77527
99.1	-5.58167	-2.74658	-14.7034	-8.3374	-18.0695	-9.8114	-8.51868	-16.0797	-15.2069	-7.78809
99.2	-5.60303	-2.75269	-14.682	-8.3313	-18.045	-9.82361	-8.5199	-16.098	-15.2252	-7.77954
99.3	-5.55115	-2.74963	-14.6851	-8.33435	-18.0542	-9.80225	-8.51929	-16.059	-15.2167	-7.7887
99.4	-5.60913	-2.74658	-14.7003	-8.33435	-18.042	-9.80225	-8.51196	-16.0809	-15.2435	-7.79541
99.5	-5.55725	-2.74658	-14.6637	-8.32825	-18.0359	-9.79614	-8.51013	-16.0797	-15.2258	-7.78687
99.6	-5.58777	-2.71606	-14.6545	-8.3313	-18.042	-9.80225	-8.50891	-16.0675	-15.2124	-7.7771
99.7	-5.55725	-2.74658	-14.682	-8.3252	-18.0633	-9.79919	-8.51807	-16.0785	-15.2197	-7.7887
99.8	-5.59692	-2.76794	-14.6973	-8.34656	-18.0603	-9.8175	-8.50769	-16.0785	-15.2179	-7.78076
99.9	-5.58167	-2.73438	-14.682	-8.33435	-18.0481	-9.79004	-8.52417	-16.0724	-15.2222	-7.78137
100	-5.58777	-2.75574	-14.6851	-8.3374	-18.0389	-9.8114	-8.52112	-16.0632	-15.2338	-7.77893
100.1	-5.60303	-2.73438	-14.6698	-8.32214	-18.0267	-9.8175	-8.5022	-16.0559	-15.2289	-7.76917
100.2	-5.61218	-2.771	-14.6851	-8.3252	-18.0359	-9.78699	-8.50159	-16.062	-15.2142	-7.77466
100.3	-5.59692	-2.76184	-14.6698	-8.3313	-18.0511	-9.79919	-8.51501	-16.0712	-15.2155	-7.771
100.4	-5.55725	-2.75574	-14.682	-8.3252	-18.0664	-9.8053	-8.51868	-16.0791	-15.2142	-7.77588
100.5	-5.59082	-2.76184	-14.679	-8.31909	-18.045	-9.8114	-8.51807	-16.0846	-15.2197	-7.77405
100.6	-5.57556	-2.72827	-14.6698	-8.30994	-18.0542	-9.80225	-8.50952	-16.0718	-15.21	-7.77039
100.7	-5.57251	-2.76184	-14.6606	-8.34045	-18.0603	-9.79614	-8.52234	-16.0754	-15.2203	-7.77771
100.8	-5.58167	-2.73438	-14.6606	-8.31604	-18.0145	-9.79614	-8.50525	-16.0571	-15.2344	-7.76184
100.9	-5.60608	-2.75879	-14.6698	-8.32825	-18.0481	-9.78699	-8.51013	-16.0669	-15.2203	-7.76245
101	-5.58472	-2.74963	-14.679	-8.3313	-18.0572	-9.79309	-8.49609	-16.0724	-15.2124	-7.78809
101.1	-5.60303	-2.75269	-14.6668	-8.31299	-18.0389	-9.77478	-8.49915	-16.0626	-15.2167	-7.75513
101.2	-5.57251	-2.78625	-14.6729	-8.32214	-18.0542	-9.8114	-8.50647	-16.0706	-15.2295	-7.78076
101.3	-5.57861	-2.73743	-14.6668	-8.30994	-18.0664	-9.8053	-8.50159	-16.0651	-15.2264	-7.76978
101.4	-5.57556	-2.74963	-14.6759	-8.3313	-18.0389	-9.79004	-8.51379	-16.0693	-15.2191	-7.77588
101.5	-5.58777	-2.74658	-14.6729	-8.30994	-18.0542	-9.78699	-8.48633	-16.0547	-15.2313	-7.75757
101.6	-5.56641	-2.76184	-14.6576	-8.32214	-18.0695	-9.77478	-8.50464	-16.062	-15.2087	-7.7771
101.7	-5.59387	-2.73132	-14.6668	-8.30688	-18.0572	-9.76257	-8.50769	-16.0748	-15.2271	-7.76428
101.8	-5.57556	-2.72827	-14.6454	-8.31909	-18.0176	-9.79004	-8.49609	-16.0748	-15.202	-7.7771
101.9	-5.59387	-2.78931	-14.6668	-8.32214	-18.045	-9.77478	-8.49792	-16.0669	-15.2289	-7.75879
102	-5.58167	-2.75879	-14.6454	-8.29773	-18.0603	-9.76257	-8.49609	-16.0467	-15.1965	-7.76672
102.1	-5.60608	-2.73743	-14.6576	-8.32214	-18.0389	-9.79309	-8.50647	-16.0498	-15.2222	-7.76489
102.2	-5.57861	-2.74353	-14.6668	-8.30688	-18.0572	-9.78394	-8.50281	-16.0638	-15.2051	-7.76611
102.3	-5.57556	-2.75574	-14.6637	-8.31604	-18.0695	-9.79309	-8.49854	-16.0675	-15.2118	-7.76062
102.4	-5.58472	-2.72827	-14.6729	-8.30078	-18.0542	-9.78394	-8.49548	-16.0474	-15.2167	-7.74109
102.5	-5.59692	-2.75574	-14.6423	-8.29773	-18.0786	-9.77783	-8.49976	-16.0767	-15.2039	-7.74841
102.6	-5.59692	-2.73132	-14.6606	-8.29773	-18.042	-9.80225	-8.50891	-16.0443	-15.2203	-7.77344
102.7	-5.59998	-2.74963	-14.6423	-8.31299	-18.0389	-9.76563	-8.51929	-16.0651	-15.2094	-7.76001
102.8	-5.59082	-2.73743	-14.6698	-8.30688	-18.0572	-9.79004	-8.50342	-16.0474	-15.2197	-7.76062
102.9	-5.57861	-2.76794	-14.6423	-8.29163	-18.0328	-9.79309	-8.51135	-16.0523	-15.2271	-7.75513
103	-5.5603	-2.76794	-14.6393	-8.31909	-18.042	-9.76257	-8.51318	-16.0425	-15.2173	-7.73682
103.1	-5.59998	-2.72827	-14.6393	-8.30688	-18.0695	-9.79004	-8.51746	-16.0632	-15.2179	-7.76367
103.2	-5.57556	-2.76794	-14.6637	-8.29163	-18.0511	-9.78394	-8.50037	-16.062	-15.213	-7.75513
103.3	-5.58472	-2.75269	-14.6668	-8.29468	-18.0664	-9.77478	-8.49609	-16.0663	-15.2313	-7.76367
103.4	-5.56641	-2.75269	-14.6423	-8.31604	-18.0511	-9.77173	-8.49304	-16.0638	-15.2106	-7.7478
103.5	-5.61218	-2.74963	-14.6515	-8.30688	-18.0481	-9.77173	-8.51501	-16.0547	-15.2179	-7.75085
103.6	-5.5481	-2.72827	-14.6454	-8.30078	-18.0542	-9.77478	-8.50525	-16.0571	-15.2063	-7.76245
103.7	-5.56946	-2.76184	-14.6454	-8.30994	-18.0206	-9.76868	-8.50342	-16.0632	-15.2271	-7.76001
103.8	-5.58472	-2.75879	-14.6484	-8.30688	-18.0633	-9.78394	-8.49548	-16.0724	-15.2185	-7.76184
103.9	-5.5542	-2.73132	-14.6545	-8.29468	-18.042	-9.77173	-8.49243	-16.0687	-15.2271	-7.76184
104	-5.60913	-2.72217	-14.6423	-8.28552	-18.0359	-9.80225	-8.50098	-16.0467	-15.2136	-7.74292
104.1	-5.5481	-2.74048	-14.6393	-8.28857	-18.0359	-9.75647	-8.50525	-16.0638	-15.2295	-7.75269
104.2	-5.59387	-2.76489	-14.6362	-8.28247	-18.0542	-9.75342	-8.48694	-16.0467	-15.221	-7.75208
104.3	-5.60608	-2.72522	-14.6301	-8.29773	-18.042	-9.76868	-8.50525	-16.0614	-15.2179	-7.7533
104.4	-5.55725	-2.74048	-14.6484	-8.30994	-18.0633	-9.78394	-8.51318	-16.0584	-15.2264	-7.74475
104.5	-5.56335	-2.75879	-14.6179	-8.29773	-18.0756	-9.79004	-8.48572	-16.0559	-15.2301	-7.75269
104.6	-5.56641	-2.76184	-14.6362	-8.28552	-18.0176	-9.75342	-8.50464	-16.0559	-15.2222	-7.74902
104.7	-5.53284	-2.74353	-14.6301	-8.28247	-18.0786	-9.74731	-8.50281	-16.0364	-15.2447	-7.74475
104.8	-5.57861	-2.74963	-14.6576	-8.29163	-18.0145	-9.76563	-8.48572	-16.0553	-15.2173	-7.74841
104.9	-5.57861	-2.74963	-14.6545	-8.29468	-18.0267	-9.77478	-8.50098	-16.0406	-15.2301	-7.76001
105	-5.59082	-2.74658	-14.6332	-8.255	-18.0298	-9.76563	-8.49731	-16.0443	-15.2252	-7.74963
105.1	-5.56641	-2.76794	-14.6484	-8.27637	-18.0481	-9.74121	-8.49609	-16.0449	-15.2368	-7.74109
105.2	-5.59387	-2.71912	-14.6393	-8.28247	-18.0481	-9.78088	-8.49365	-16.0474	-15.2307	-7.76123
105.3	-5.53894	-2.76184	-14.6423	-8.27332	-18.0389	-9.75952	-8.48877	-16.0565	-15.2441	-7.74902
105.4	-5.59998	-2.73743	-14.6606	-8.27637	-18.0267	-9.76868	-8.48938	-16.0541	-15.2301	-7.74963
105.5	-5.57251	-2.75269	-14.6668	-8.27332	-18.0176	-9.75342	-8.50647	-16.0413	-15.2313	-7.7533
105.6	-5.58472	-2.75269	-14.6484	-8.27026	-18.0359	-9.79309	-8.48633	-16.0309	-15.2277	-7.75085
105.7	-5.58777	-2.71912	-14.6729	-8.25806	-18.0206	-9.76257	-8.49731	-16.0553	-15.2197	-7.7417
105.8	-5.5542	-2.76184	-14.6545	-8.29163	-18.0359	-9.75037	-8.48816	-16.0541	-15.2393	-7.74719
105.9	-5.56946	-2.74658	-14.6545	-8.27942	-18.0633	-9.75037	-8.49609	-16.0608	-15.2307	-7.75391
106	-5.57251	-2.74658	-14.6362	-8.28247	-18.0237	-9.75952	-8.4967	-16.0437	-15.2411	-7.75024
106.1	-5.55725	-2.7771	-14.6301	-8.26416	-18.0511	-9.75952	-8.49304	-16.0413	-15.2234	-7.75024
106.2	-5.5542	-2.73743	-14.6545	-8.28247	-18.0664	-9.75037	-8.4967	-16.0486	-15.2216	-7.74353
106.3	-5.57861	-2.72827	-14.6545	-8.28247	-18.0359	-9.75342	-8.5083	-16.0584	-15.246	-7.74963
106.4	-5.58777	-2.74963	-14.6484	-8.26416	-18.0542	-9.75037	-8.48633	-16.0455	-15.2264	-7.74231
106.5	-5.56946	-2.71912	-14.6698	-8.29163	-18.0481	-9.74731	-8.50708	-16.0431	-15.2155	-7.73621
106.6	-5.59082	-2.72827	-14.6454	-8.27332	-18.0542	-9.75647	-8.49792	-16.0455	-15.2441	-7.75452
106.7	-5.55725	-2.75574	-14.6576	-8.27637	-18.0389	-9.75037	-8.49365	-16.0492	-15.2222	-7.74353
106.8	-5.59082	-2.73438	-14.6423	-8.255	-18.0481	-9.75342	-8.48022	-16.0547	-15.221	-7.74292
106.9	-5.56335	-2.72827	-14.624	-8.27026	-18.0572	-9.76257	-8.47778	-16.0474	-15.2264	-7.75513
107	-5.57861	-2.75269	-14.6576	-8.26416	-18.0878	-9.74426	-8.49609	-16.0431	-15.2264	-7.74597
107.1	-5.57251	-2.75879	-14.6515	-8.27332	-18.0511	-9.75037	-8.48022	-16.0736	-15.2417	-7.72339
107.2	-5.58472	-2.771	-14.6637	-8.28857	-18.0359	-9.76563	-8.48328	-16.0498	-15.2197	-7.75146
107.3	-5.57861	-2.71912	-14.6393	-8.25806	-18.045	-9.73206	-8.4668	-16.0492	-15.2319	-7.74536
107.4	-5.59692	-2.76184	-14.6576	-8.27332	-18.0603	-9.76257	-8.48328	-16.0645	-15.2258	-7.7301
107.5	-5.59998	-2.73438	-14.6576	-8.25806	-18.045	-9.76563	-8.4967	-16.0492	-15.2283	-7.74963
107.6	-5.56946	-2.75269	-14.6545	-8.25195	-18.0481	-9.73511	-8.49121	-16.0584	-15.2356	-7.74231
107.7	-5.54199	-2.77405	-14.6423	-8.2489	-18.0633	-9.73816	-8.46924	-16.0523	-15.221	-7.73804
107.8	-5.59082	-2.72217	-14.679	-8.26111	-18.0481	-9.73511	-8.48755	-16.0449	-15.2264	-7.72644
107.9	-5.61523	-2.74353	-14.6576	-8.27332	-18.0664	-9.74731	-8.47961	-16.0474	-15.2271	-7.72522
108	-5.57251	-2.72217	-14.6484	-8.26721	-18.0633	-9.77173	-8.48816	-16.076	-15.2173	-7.73987
108.1	-5.5481	-2.74048	-14.6759	-8.24585	-18.0511	-9.74426	-8.48328	-16.0486	-15.2289	-7.72766
108.2	-5.58472	-2.73438	-14.6637	-8.27637	-18.0511	-9.74426	-8.48022	-16.0461	-15.2405	-7.72827
108.3	-5.55725	-2.771	-14.6606	-8.22754	-18.0328	-9.75037	-8.46558	-16.0742	-15.2362	-7.73315
108.4	-5.59692	-2.71301	-14.6698	-8.26416	-18.0206	-9.74121	-8.46924	-16.0443	-15.21	-7.72278
108.5	-5.57251	-2.75574	-14.6637	-8.26416	-18.042	-9.75037	-8.47351	-16.0663	-15.2264	-7.724
108.6	-5.59082	-2.71606	-14.6668	-8.255	-18.042	-9.73206	-8.46619	-16.0565	-15.2222	-7.73682
108.7	-5.57251	-2.74658	-14.6606	-8.25806	-18.0389	-9.73206	-8.47595	-16.0724	-15.2319	-7.72339
108.8	-5.59387	-2.73132	-14.6851	-8.23669	-18.0481	-9.73511	-8.47168	-16.0425	-15.2161	-7.73132
108.9	-5.58777	-2.7771	-14.6576	-8.25195	-18.0481	-9.74731	-8.47961	-16.073	-15.2405	-7.73071
109	-5.57556	-2.74658	-14.6698	-8.25806	-18.0481	-9.72595	-8.47046	-16.051	-15.2319	-7.72461
109.1	-5.5542	-2.74353	-14.6606	-8.2489	-18.0511	-9.729	-8.4613	-16.0608	-15.2563	-7.72278
109.2	-5.58167	-2.7771	-14.6515	-8.23975	-18.0389	-9.729	-8.46375	-16.0773	-15.2264	-7.73071
109.3	-5.59082	-2.75879	-14.6637	-8.26416	-18.042	-9.73511	-8.47412	-16.0437	-15.2228	-7.71301
109.4	-5.57251	-2.72827	-14.6637	-8.23059	-18.045	-9.73816	-8.46558	-16.062	-15.2325	-7.74048
109.5	-5.56641	-2.76489	-14.6729	-8.25806	-18.0267	-9.73511	-8.46436	-16.0834	-15.2234	-7.72705
109.6	-5.5603	-2.73743	-14.6729	-8.24585	-18.042	-9.71985	-8.48267	-16.0681	-15.2411	-7.7301
109.7	-5.56335	-2.74963	-14.682	-8.26111	-18.0695	-9.74121	-8.46252	-16.0584	-15.2124	-7.71484
109.8	-5.61218	-2.73132	-14.6668	-8.25806	-18.0542	-9.75037	-8.47473	-16.0748	-15.2264	-7.72705
109.9	-5.56946	-2.74353	-14.679	-8.23975	-18.0481	-9.76257	-8.48633	-16.0547	-15.2289	-7.72827
110	-5.59692	-2.75879	-14.6759	-8.24585	-18.0267	-9.70459	-8.45398	-16.0553	-15.2271	-7.71851
110.1	-5.59998	-2.73132	-14.679	-8.2489	-18.045	-9.729	-8.47717	-16.0535	-15.2344	-7.70569
110.2	-5.56946	-2.73743	-14.6759	-8.23364	-18.0389	-9.76257	-8.44849	-16.0504	-15.2325	-7.72522
110.3	-5.56641	-2.71301	-14.6729	-8.23975	-18.0115	-9.75037	-8.46436	-16.073	-15.213	-7.71423
110.4	-5.57861	-2.72522	-14.6545	-8.2428	-18.0328	-9.69849	-8.4552	-16.0657	-15.2502	-7.71667
110.5	-5.57556	-2.75574	-14.6606	-8.25195	-18.0298	-9.74731	-8.4668	-16.0474	-15.2289	-7.71057
110.6	-5.58777	-2.70081	-14.6606	-8.23975	-18.0603	-9.72595	-8.44116	-16.0791	-15.2283	-7.71973
110.7	-5.5603	-2.75574	-14.6698	-8.2428	-18.0237	-9.72595	-8.46863	-16.0358	-15.2289	-7.70813
110.8	-5.58472	-2.73132	-14.6668	-8.23364	-18.0511	-9.72595	-8.45215	-16.0596	-15.2271	-7.72644
110.9	-5.58777	-2.73132	-14.679	-8.23364	-18.0359	-9.71985	-8.45764	-16.0651	-15.2155	-7.72095
111	-5.57556	-2.73743	-14.6606	-8.2489	-18.0633	-9.71985	-8.44482	-16.0736	-15.235	-7.69348
111.1	-5.54199	-2.74658	-14.6606	-8.23059	-18.042	-9.729	-8.43872	-16.0602	-15.2289	-7.70996
111.2	-5.58167	-2.72217	-14.7003	-8.23975	-18.045	-9.71985	-8.45764	-16.0486	-15.2344	-7.70996
111.3	-5.58777	-2.74963	-14.6698	-8.22754	-18.0359	-9.70154	-8.46008	-16.0461	-15.2374	-7.70813
111.4	-5.58167	-2.72827	-14.6637	-8.23669	-18.0603	-9.7229	-8.45825	-16.0523	-15.2124	-7.71179
111.5	-5.56946	-2.74048	-14.6576	-8.2428	-18.0206	-9.72595	-8.45581	-16.062	-15.2454	-7.70264
111.6	-5.59082	-2.74048	-14.6759	-8.22754	-18.042	-9.73511	-8.45764	-16.059	-15.221	-7.70874
111.7	-5.5542	-2.73743	-14.6576	-8.23364	-18.0603	-9.729	-8.4552	-16.0736	-15.2405	-7.71667
111.8	-5.58167	-2.72827	-14.6515	-8.2428	-18.0267	-9.7168	-8.45398	-16.0541	-15.2106	-7.71484
111.9	-5.58777	-2.77405	-14.6637	-8.22144	-18.0328	-9.73206	-8.44971	-16.0858	-15.2502	-7.71179
112	-5.56641	-2.77405	-14.6545	-8.23364	-18.045	-9.70154	-8.44055	-16.0675	-15.2136	-7.70386
112.1	-5.58777	-2.74048	-14.6668	-8.22449	-18.0237	-9.71375	-8.43872	-16.0547	-15.2301	-7.69897
112.2	-5.59082	-2.74963	-14.6423	-8.20618	-18.0633	-9.75647	-8.44666	-16.0681	-15.221	-7.70142
112.3	-5.5542	-2.73438	-14.6545	-8.24585	-18.0542	-9.71375	-8.44055	-16.0608	-15.2222	-7.70325
112.4	-5.5542	-2.75879	-14.6423	-8.22754	-18.0176	-9.7168	-8.43445	-16.0559	-15.2399	-7.6947
112.5	-5.57861	-2.70386	-14.6668	-8.21838	-18.0481	-9.71069	-8.43079	-16.0651	-15.2142	-7.69653
112.6	-5.57861	-2.74963	-14.6515	-8.23364	-18.0389	-9.73206	-8.43872	-16.0803	-15.2258	-7.69958
112.7	-5.5603	-2.74353	-14.6637	-8.20923	-18.0267	-9.71985	-8.43323	-16.04	-15.224	-7.71301
112.8	-5.56641	-2.74963	-14.6545	-8.23364	-18.0328	-9.72595	-8.44849	-16.0785	-15.2191	-7.68494
112.9	-5.58167	-2.71912	-14.6515	-8.22144	-18.0725	-9.71069	-8.43628	-16.0638	-15.2045	-7.70935
113	-5.60608	-2.74963	-14.6606	-8.23364	-18.0359	-9.71069	-8.42957	-16.0657	-15.2118	-7.70691
113.1	-5.58472	-2.74658	-14.6454	-8.23975	-18.0389	-9.7168	-8.43506	-16.059	-15.2185	-7.68677
113.2	-5.56335	-2.73743	-14.6606	-8.23059	-18.0328	-9.70154	-8.4259	-16.0663	-15.2136	-7.70081
113.3	-5.58472	-2.76489	-14.6637	-8.21838	-18.0298	-9.73511	-8.43323	-16.0651	-15.2283	-7.70691
113.4	-5.57861	-2.74658	-14.6668	-8.22754	-18.0328	-9.69543	-8.44421	-16.0687	-15.2057	-7.69226
113.5	-5.58167	-2.771	-14.6423	-8.22449	-18.0572	-9.68323	-8.43872	-16.0895	-15.2045	-7.69409
113.6	54.4403	56.9733	14.4806	19.9768	5.78003	12.0972	6.42761	0.03723	-0.70984	5.51331
113.7	93.3899	96.0846	63.4796	69.1834	86.6974	98.2971	19.9994	19.9994	19.9994	19.9994
113.8	55.188	55.6702	46.1761	48.4467	58.2092	60.9436	19.9994	19.9994	19.9994	19.9994
113.9	33.6914	32.9864	33.0566	33.4747	25.7721	25.6348	19.9994	19.9994	19.9994	19.9994
114	20.9168	19.5801	24.826	24.2432	18.9209	18.0206	19.9994	19.9994	19.9994	19.9994
114.1	13.5895	12.0422	19.6167	18.4418	17.5415	15.8173	19.9994	19.9994	19.9994	19.9994
114.2	9.42993	7.8125	16.272	14.6729	15.6128	13.1561	19.9994	19.9994	19.9994	19.9994
114.3	7.00073	5.43518	14.0045	12.1216	13.7116	10.8856	17.7618	19.7717	19.5496	17.9065
114.4	5.6366	4.14734	12.3932	10.2997	12.5366	9.48486	15.2588	17.746	17.4561	15.4932
114.5	4.82178	3.39966	11.1938	8.96301	11.8988	8.70667	13.2434	16.095	15.8069	13.5382
114.6	4.32129	2.93274	10.2966	7.97119	11.4624	8.12683	11.6602	14.8114	14.4568	11.9574
114.7	4.04053	2.72522	9.60388	7.1991	11.0626	7.68738	10.365	13.7238	13.3539	10.6488
114.8	3.81775	2.59705	9.03931	6.5979	10.7513	7.39441	9.32861	12.8644	12.4762	9.58862
114.9	3.71094	2.49329	8.60291	6.10962	10.5652	7.12891	8.48145	12.1374	11.7358	8.70544
115	3.61938	2.45056	8.255	5.76172	10.4065	6.92139	7.7887	11.5448	11.1395	7.97729
115.1	3.57666	2.46277	7.98035	5.43518	10.2417	6.78711	7.21985	11.0376	10.6488	7.37366
115.2	3.52478	2.4353	7.724	5.20325	10.1318	6.67114	6.74866	10.6561	10.2429	6.88232
115.3	3.49426	2.45972	7.52869	5.01709	10.0372	6.58264	6.37146	10.3027	9.88586	6.4563
115.4	3.49731	2.45667	7.36084	4.83093	9.96094	6.52161	6.03577	10.0256	9.59412	6.13037
115.5	3.45764	2.4353	7.2113	4.6936	9.85718	6.43616	5.77942	9.75769	9.36462	5.82703
115.6	3.43628	2.5116	7.1106	4.57764	9.82361	6.41479	5.57129	9.54529	9.14795	5.6073
115.7	3.45154	2.45667	7.01294	4.50134	9.74426	6.33545	5.38574	9.37256	8.96729	5.38879
115.8	3.45764	2.52075	6.90918	4.42505	9.64966	6.31409	5.25208	9.21753	8.82446	5.22888
115.9	3.41797	2.52686	6.8512	4.37012	9.61914	6.27747	5.09827	9.07898	8.68591	5.08545
116	3.40881	2.52075	6.79321	4.27856	9.58557	6.22559	5.01343	8.95691	8.58582	4.98291
116.1	3.3783	2.54211	6.69861	4.25415	9.53064	6.21948	4.93591	8.86902	8.48022	4.87549
116.2	3.35388	2.54211	6.66809	4.21448	9.47266	6.20117	4.85229	8.76465	8.39844	4.77966
116.3	3.35693	2.53601	6.5918	4.18396	9.45129	6.1615	4.81323	8.6731	8.31909	4.71497
116.4	3.3844	2.55127	6.56738	4.14124	9.39331	6.14929	4.7345	8.62	8.23792	4.6405
116.5	3.35693	2.55737	6.53687	4.11987	9.33228	6.11877	4.70825	8.54431	8.17932	4.59351
116.6	3.35083	2.57568	6.49719	4.09546	9.32922	6.11877	4.66431	8.47229	8.13965	4.54712
116.7	3.33557	2.57874	6.43311	4.06799	9.26208	6.073	4.62524	8.42346	8.07434	4.49402
116.8	3.32336	2.58789	6.40564	4.06494	9.24377	6.05469	4.58801	8.35327	8.01941	4.47388
116.9	3.32336	2.6062	6.37817	4.03137	9.18274	6.03943	4.56604	8.3252	7.98035	4.42871
117	3.302	2.56348	6.34766	4.01306	9.16748	6.02417	4.54651	8.27759	7.92786	4.39636
117.1	3.28979	2.59705	6.32019	4.01917	9.09729	6.00891	4.53247	8.21228	7.89001	4.38721
117.2	3.26843	2.56958	6.28052	3.9978	9.08508	5.99976	4.50256	8.18604	7.84912	4.37866
117.3	3.25012	2.63062	6.24084	3.96729	9.05151	5.9906	4.48792	8.14941	7.81616	4.3457
117.4	3.26843	2.60925	6.23169	3.98254	9.01184	5.94482	4.46045	8.09753	7.77954	4.32434
117.5	3.27454	2.6001	6.19202	3.93982	8.97827	5.94482	4.45251	8.05237	7.7533	4.31763
117.6	3.26843	2.6123	6.14624	3.94592	8.93555	5.93872	4.4342	8.02673	7.71179	4.28589
117.7	3.22571	2.62451	6.13708	3.92456	8.92639	5.93262	4.41711	7.995	7.68311	4.27795
117.8	3.25623	2.62146	6.12488	3.91846	8.8623	5.90515	4.41345	7.94922	7.6532	4.26941
117.9	3.23486	2.62756	6.08826	3.91846	8.88062	5.85938	4.40491	7.92114	7.63184	4.25659
118	3.22571	2.62756	6.06689	3.88794	8.83484	5.89294	4.38965	7.89917	7.59033	4.23218
118.1	3.21045	2.63977	6.04248	3.89404	8.80127	5.87158	4.37256	7.86682	7.57263	4.23889
118.2	3.2196	2.64282	6.01501	3.88489	8.77075	5.84412	4.36096	7.83264	7.54761	4.22424
118.3	3.18909	2.62756	6.01196	3.83606	8.74329	5.82886	4.34448	7.80579	7.51587	4.2041
118.4	3.21655	2.63367	5.99976	3.86963	8.72192	5.83496	4.34021	7.79297	7.50183	4.20532
118.5	3.2074	2.63977	5.97229	3.85437	8.70361	5.81665	4.32983	7.74963	7.47131	4.17786
118.6	3.18604	2.63672	5.94482	3.85132	8.67004	5.79224	4.31702	7.72644	7.45972	4.18579
118.7	3.16772	2.64587	5.92041	3.82385	8.64868	5.77087	4.31396	7.7002	7.44202	4.17053
118.8	3.19519	2.64893	5.90515	3.8208	8.61206	5.78613	4.30664	7.66541	7.41028	4.1626
118.9	3.16162	2.66113	5.88989	3.84827	8.57544	5.76782	4.2981	7.62695	7.3938	4.16687
119	3.16162	2.62146	5.86853	3.80554	8.56628	5.74951	4.29443	7.60071	7.37793	4.15588
119.1	3.13416	2.6886	5.85022	3.79944	8.55408	5.74951	4.28711	7.54883	7.34558	4.14978
119.2	3.17688	2.62146	5.82886	3.80249	8.50525	5.72815	4.26453	7.52197	7.3468	4.13208
119.3	3.1311	2.65808	5.82886	3.78418	8.49304	5.71899	4.27002	7.49695	7.31384	4.13269
119.4	3.13416	2.65503	5.80444	3.79333	8.47778	5.70068	4.26636	7.47559	7.29919	4.12964
119.5	3.09753	2.66113	5.77087	3.77197	8.45337	5.72815	4.24988	7.47131	7.27173	4.11743
119.6	3.13721	2.63672	5.76782	3.76587	8.43506	5.70068	4.24683	7.46582	7.24976	4.10767
119.7	3.10974	2.6825	5.76172	3.77502	8.39844	5.67322	4.25903	7.46582	7.23816	4.1095
119.8	3.10364	2.64893	5.7373	3.76282	8.37402	5.67322	4.24011	7.46887	7.22412	4.10461
119.9	3.10059	2.65808	5.70984	3.75671	8.35571	5.70374	4.23096	7.453	7.20581	4.10095
120	3.08838	2.62451	5.70374	3.75366	8.37097	5.67322	4.22485	7.44629	7.20459	4.08875
120.1	3.1189	2.6825	5.67322	3.74756	8.31604	5.66711	4.20959	7.43103	7.18201	4.09363
120.2	3.08533	2.63977	5.67322	3.7323	8.30383	5.63049	4.22058	7.40601	7.17896	4.08142
120.3	3.07922	2.67029	5.67322	3.7323	8.30383	5.6366	4.20288	7.41943	7.16797	4.06555
120.4	3.08533	2.63672	5.6427	3.7262	8.28247	5.62439	4.2041	7.40784	7.146	4.06494
120.5	3.09448	2.67944	5.6366	3.72314	8.24585	5.63965	4.1925	7.39197	7.10266	4.05762
120.6	3.07922	2.64282	5.62134	3.7262	8.22144	5.63049	4.19678	7.3645	7.10693	4.06555
120.7	3.03955	2.66724	5.61218	3.72009	8.20313	5.60913	4.19434	7.36267	7.09106	4.05579
120.8	3.06702	2.65808	5.58472	3.71399	8.19092	5.59998	4.17542	7.35535	7.09229	4.03931
120.9	3.05176	2.67029	5.57861	3.70789	8.1665	5.60913	4.18396	7.3291	7.0813	4.04602
121	3.06396	2.67334	5.5542	3.69873	8.18176	5.58167	4.17419	7.32056	7.07336	4.02893
121.1	3.06396	2.67334	5.56641	3.71399	8.15735	5.59387	4.16931	7.30835	7.04163	4.03687
121.2	3.08228	2.63672	5.5542	3.68652	8.13904	5.56946	4.1687	7.30286	7.04041	4.02405
121.3	3.05176	2.64587	5.52673	3.69263	8.10242	5.57251	4.16748	7.29614	7.02637	4.02405
121.4	3.0426	2.64282	5.51758	3.68652	8.10852	5.54504	4.15894	7.27051	7.00928	4.03564
121.5	3.01514	2.67639	5.51453	3.70483	8.10547	5.56335	4.15405	7.27112	7.01477	4.01733
121.6	3.0426	2.65198	5.50537	3.66821	8.0719	5.57251	4.15833	7.25525	7.00745	4.01672
121.7	3.05176	2.66113	5.49011	3.68042	8.05664	5.53284	4.15771	7.23328	6.99097	4.01489
121.8	3.00903	2.65808	5.46265	3.69873	8.04138	5.56946	4.14368	7.2345	6.98547	4.01184
121.9	3.03955	2.65503	5.46875	3.67737	8.05054	5.54199	4.15039	7.22107	6.97205	4.01428
122	3.03345	2.66113	5.45654	3.67737	8.02002	5.53894	4.13879	7.21558	6.97815	4.00024
122.1	3.01514	2.66113	5.44434	3.68347	8.02002	5.52673	4.13208	7.20459	6.95313	4.00269
122.2	3.01514	2.64282	5.43213	3.67126	7.98035	5.52979	4.14063	7.1875	6.93848	4.00391
122.3	3.00598	2.62756	5.43823	3.68042	7.99255	5.50842	4.11743	7.17773	6.9458	3.9917
122.4	3.01514	2.67029	5.39551	3.65906	7.96814	5.48401	4.1272	7.17834	6.91833	3.99902
122.5	3.00903	2.64893	5.39551	3.66211	7.94983	5.51147	4.11865	7.16309	6.91162	3.99536
122.6	2.98767	2.67029	5.41382	3.68042	7.91931	5.52063	4.12964	7.14539	6.92383	3.98987
122.7	3.01208	2.64587	5.39246	3.65601	7.93762	5.49927	4.12292	7.15088	6.91101	3.98193
122.8	3.00598	2.68555	5.39246	3.6377	7.94373	5.50232	4.11438	7.13379	6.90125	3.98315
122.9	3.00903	2.67029	5.36194	3.6438	7.9071	5.46875	4.12048	7.12524	6.89758	3.9801
123	2.96936	2.63062	5.37415	3.65906	7.901	5.49927	4.10645	7.12402	6.87683	3.98499
123.1	2.97852	2.6825	5.35278	3.64685	7.88879	5.48706	4.10522	7.09839	6.89148	3.97522
123.2	2.99072	2.66418	5.34363	3.66516	7.89185	5.45959	4.11133	7.10693	6.87195	3.97583
123.3	2.98462	2.63672	5.35278	3.6438	7.88269	5.49927	4.10583	7.11121	6.8573	3.98315
123.4	2.97546	2.6947	5.33752	3.63159	7.85828	5.47791	4.10461	7.09473	6.85425	3.97827
123.5	2.95715	2.63367	5.33142	3.64685	7.85828	5.48096	4.10583	7.07642	6.84387	3.97217
123.6	2.98157	2.6947	5.32837	3.6377	7.84607	5.44739	4.10522	7.07886	6.8512	3.96362
123.7	2.97852	2.63977	5.31921	3.64685	7.84912	5.44739	4.09668	7.06482	6.82678	3.95447
123.8	2.96631	2.62756	5.29175	3.64075	7.83081	5.48706	4.11011	7.05688	6.83167	3.96362
123.9	2.95715	2.65808	5.3009	3.66211	7.81555	5.43823	4.09912	7.06238	6.81213	3.96729
124	2.94495	2.65198	5.29785	3.62549	7.80334	5.46875	4.09607	7.04407	6.80725	3.96057
124.1	2.99072	2.64893	5.28259	3.6438	7.79114	5.45654	4.09363	7.04712	6.80969	3.95508
124.2	2.93274	2.63672	5.27344	3.63464	7.80029	5.44739	4.0918	7.04529	6.79871	3.95691
124.3	2.95715	2.66113	5.26733	3.63159	7.77283	5.45044	4.09363	7.03186	6.80481	3.95386
124.4	2.93884	2.63977	5.24902	3.62244	7.77588	5.44128	4.09851	7.01843	6.78345	3.95813
124.5	2.95715	2.66724	5.24902	3.63464	7.76367	5.45044	4.09119	7.00562	6.77917	3.94836
124.6	2.90527	2.64587	5.24902	3.6377	7.74841	5.44128	4.0979	7.01599	6.77185	3.95508
124.7	2.95715	2.65808	5.22766	3.61938	7.74841	5.43518	4.09851	7.01233	6.76697	3.95203
124.8	2.93884	2.67029	5.23071	3.62854	7.75146	5.44434	4.0918	6.99768	6.77856	3.95081
124.9	2.90833	2.63977	5.22766	3.61938	7.73315	5.41992	4.09607	6.99097	6.74744	3.94836
125	2.94189	2.64587	5.2124	3.62549	7.72705	5.44128	4.08875	6.9873	6.75354	3.94653
125.1	2.9541	2.65503	5.21851	3.62244	7.72095	5.41382	4.07593	6.97327	6.74194	3.94775
125.2	2.948	2.65198	5.21545	3.63159	7.70264	5.43823	4.08142	6.96899	6.73401	3.94653
125.3	2.92969	2.67334	5.2063	3.63159	7.69653	5.42297	4.09363	6.95801	6.74438	3.94287
125.4	2.95715	2.66113	5.2002	3.62549	7.71484	5.43823	4.08325	6.97144	6.72974	3.94897
125.5	2.93579	2.62451	5.19714	3.62244	7.67822	5.40466	4.08325	6.95251	6.70898	3.95203
125.6	2.93884	2.62756	5.18799	3.62549	7.67212	5.39551	4.08752	6.96777	6.72729	3.94714
125.7	2.91748	2.64893	5.18799	3.62244	7.68433	5.41687	4.08997	6.94946	6.71021	3.94958
125.8	2.92664	2.67639	5.17883	3.62244	7.66296	5.39551	4.0863	6.94153	6.71387	3.95081
125.9	2.91748	2.62756	5.18494	3.62244	7.67212	5.42297	4.08325	6.93604	6.70593	3.9386
126	2.91748	2.64893	5.17578	3.6377	7.68433	5.39246	4.08691	6.93726	6.69861	3.94287
126.1	2.90222	2.63367	5.17883	3.61328	7.65381	5.40466	4.08325	6.92688	6.71082	3.94348
126.2	2.91748	2.63672	5.16968	3.61938	7.64465	5.40161	4.07349	6.93359	6.68091	3.94531
126.3	2.89612	2.62451	5.15442	3.62549	7.65381	5.41077	4.08508	6.92078	6.70105	3.9624
126.4	2.92358	2.66724	5.17578	3.62244	7.62329	5.39551	4.08691	6.91406	6.69434	3.9447
126.5	2.90222	2.67334	5.16968	3.62854	7.64771	5.40771	4.08081	6.91223	6.67969	3.95142
126.6	2.89612	2.63062	5.13916	3.63464	7.63855	5.40466	4.07837	6.90369	6.68091	3.9502
126.7	2.91138	2.63977	5.16052	3.63159	7.60803	5.38635	4.0741	6.91223	6.6748	3.9447
126.8	2.90833	2.62756	5.15747	3.61938	7.61719	5.40466	4.08691	6.90979	6.67603	3.94653
126.9	2.89612	2.64282	5.14526	3.62549	7.60498	5.40161	4.08691	6.91223	6.66748	3.95203
127	2.90833	2.63367	5.13611	3.62854	7.60803	5.37415	4.08142	6.88538	6.67236	3.94958
127.1	2.88696	2.62146	5.14221	3.62549	7.61414	5.3833	4.08264	6.88782	6.66992	3.9447
127.2	2.87476	2.64893	5.12085	3.62244	7.59583	5.41077	4.08936	6.89209	6.67542	3.94104
127.3	2.91138	2.65198	5.1239	3.62244	7.57446	5.40771	4.09302	6.87012	6.65955	3.94287
127.4	2.89917	2.66418	5.13611	3.63464	7.60803	5.3894	4.08508	6.87622	6.65039	3.95935
127.5	2.90527	2.63062	5.12085	3.6377	7.5592	5.39246	4.0741	6.87378	6.63757	3.95203
127.6	2.88696	2.64587	5.10864	3.62854	7.55005	5.39551	4.08508	6.86646	6.66138	3.96057
127.7	2.88391	2.62756	5.12695	3.62854	7.56531	5.39856	4.08936	6.8573	6.64368	3.94348
127.8	2.87476	2.66418	5.10559	3.62854	7.56531	5.3833	4.08203	6.87378	6.64917	3.94897
127.9	2.85339	2.63977	5.10864	3.6377	7.55005	5.40466	4.08936	6.86157	6.65161	3.94775
128	2.91138	2.65198	5.11169	3.61633	7.55005	5.40466	4.08508	6.85852	6.65405	3.94836
128.1	2.88086	2.63672	5.1239	3.62244	7.5592	5.38635	4.09668	6.8512	6.62903	3.96423
128.2	2.89001	2.66418	5.12085	3.62549	7.54395	5.3772	4.08875	6.84875	6.63757	3.95081
128.3	2.90222	2.64282	5.11169	3.62854	7.57141	5.40161	4.09546	6.84387	6.65222	3.95874
128.4	2.8717	2.64282	5.1178	3.64075	7.54089	5.34973	4.08691	6.85974	6.63574	3.95142
128.5	2.86865	2.64587	5.09949	3.61938	7.53174	5.39551	4.08508	6.85181	6.64246	3.95752
128.6	2.88696	2.63062	5.11169	3.62244	7.5531	5.38025	4.09058	6.83228	6.63269	3.95691
128.7	2.86865	2.66724	5.10559	3.63159	7.51953	5.38025	4.10828	6.8396	6.61987	3.95691
128.8	2.8656	2.62451	5.10254	3.62244	7.53479	5.3772	4.09851	6.83411	6.61804	3.95691
128.9	2.87781	2.61536	5.10254	3.62854	7.52869	5.36804	4.0918	6.828	6.63635	3.95691
129	2.86255	2.62756	5.10254	3.6438	7.51038	5.37109	4.08997	6.82678	6.64001	3.96179
129.1	2.85645	2.65808	5.09033	3.62549	7.51343	5.37109	4.09424	6.83594	6.62842	3.95935
129.2	2.85339	2.63367	5.08118	3.62549	7.52563	5.37109	4.09607	6.82495	6.62903	3.95935
129.3	2.86865	2.64587	5.09949	3.64075	7.50122	5.3833	4.10156	6.82556	6.62048	3.96301
129.4	2.8656	2.63062	5.10254	3.66516	7.51038	5.37109	4.09119	6.82556	6.61926	3.96301
129.5	2.8595	2.64893	5.07202	3.62244	7.51343	5.38635	4.104	6.82556	6.63147	3.96912
129.6	2.83508	2.63977	5.09338	3.6499	7.47681	5.39246	4.10278	6.8219	6.6272	3.96973
129.7	2.88086	2.63367	5.09338	3.6438	7.51953	5.37415	4.10583	6.80115	6.61682	3.97339
129.8	2.82288	2.64282	5.07202	3.63159	7.47986	5.37109	4.09485	6.81335	6.61682	3.97522
129.9	2.84424	2.65808	5.08118	3.64075	7.50122	5.36194	4.09973	6.80237	6.61499	3.97034
130	2.87781	2.64893	5.08118	3.63159	7.49207	5.3772	4.09363	6.80054	6.61072	3.98132
130.1	2.84119	2.64282	5.08423	3.64685	7.48596	5.3833	4.10156	6.80176	6.62048	3.97034
130.2	2.84729	2.63367	5.08118	3.62244	7.48596	5.37415	4.10339	6.79565	6.62415	3.97034
130.3	2.87781	2.63062	5.06897	3.63464	7.47986	5.3833	4.09546	6.80481	6.6095	3.97339
130.4	2.85645	2.65503	5.08118	3.64685	7.4646	5.3772	4.09851	6.79993	6.60645	3.97156
130.5	2.81677	2.63977	5.08728	3.64075	7.46765	5.37109	4.10706	6.79199	6.60645	3.97949
130.6	2.8595	2.65808	5.09033	3.6438	7.47681	5.38635	4.10522	6.79688	6.61682	3.97339
130.7	2.83203	2.62756	5.09949	3.62854	7.46155	5.38025	4.09729	6.79321	6.61499	3.97766
130.8	2.84424	2.64893	5.09033	3.6438	7.46765	5.37415	4.10217	6.7865	6.61133	3.97522
130.9	2.8717	2.63672	5.07507	3.65295	7.45239	5.39551	4.11316	6.80298	6.58752	3.97644
131	2.81067	2.64893	5.07507	3.64685	7.47681	5.39246	4.10645	6.79077	6.60461	3.96973
131.1	2.86255	2.62146	5.09338	3.64075	7.4646	5.35583	4.10339	6.78406	6.59668	3.98254
131.2	2.84424	2.62756	5.09949	3.6377	7.4646	5.36499	4.11194	6.77734	6.60034	3.98132
131.3	2.84424	2.63062	5.08423	3.65295	7.4585	5.39246	4.11194	6.78162	6.60278	3.97522
131.4	2.82898	2.6123	5.07813	3.6499	7.44019	5.36499	4.11255	6.78406	6.61011	3.97522
131.5	2.85645	2.66113	5.07507	3.65295	7.4585	5.3772	4.11377	6.79016	6.58997	3.98254
131.6	2.82593	2.6123	5.08118	3.6438	7.43103	5.36804	4.12354	6.77185	6.60706	3.97461
131.7	2.81677	2.64282	5.08423	3.63159	7.43713	5.38025	4.10095	6.78711	6.59485	3.97705
131.8	2.81982	2.6123	5.06592	3.65906	7.45239	5.3772	4.11499	6.77612	6.59424	3.98499
131.9	2.82288	2.65808	5.08423	3.6438	7.43103	5.3894	4.1095	6.7749	6.60645	3.97766
132	2.84424	2.64587	5.09644	3.66821	7.43408	5.38635	4.12415	6.77673	6.59241	3.98987
132.1	2.82288	2.62756	5.07507	3.67126	7.45239	5.3772	4.10767	6.77551	6.5863	3.98804
132.2	2.83508	2.63062	5.09949	3.6499	7.43103	5.39246	4.10828	6.78162	6.59485	3.99536
132.3	2.83508	2.62756	5.07507	3.65295	7.44019	5.37109	4.12781	6.76636	6.59363	3.98499
132.4	2.8595	2.62451	5.09033	3.66821	7.41882	5.38025	4.11255	6.7804	6.58813	3.98682
132.5	2.80762	2.63672	5.07813	3.66211	7.45239	5.39246	4.10889	6.75537	6.59241	3.9856
132.6	2.81982	2.63672	5.09949	3.65906	7.42188	5.3833	4.1156	6.77063	6.59424	3.98438
132.7	2.83203	2.6123	5.10559	3.66516	7.41577	5.38635	4.12354	6.76941	6.57532	3.99353
132.8	2.82593	2.65808	5.08118	3.66211	7.40662	5.35889	4.11621	6.76025	6.5863	3.99048
132.9	2.85034	2.63977	5.08728	3.67126	7.44019	5.36499	4.12781	6.7627	6.5741	3.98865
133	2.85645	2.62451	5.09644	3.67126	7.40662	5.39551	4.12598	6.76819	6.5918	3.98804
133.1	2.82288	2.65503	5.09644	3.66516	7.39441	5.3833	4.11377	6.76453	6.58142	3.99231
133.2	2.83203	2.6123	5.09644	3.68042	7.40967	5.3894	4.11743	6.76575	6.58875	3.99109
133.3	2.83203	2.63367	5.09033	3.66516	7.42493	5.37109	4.11621	6.76208	6.59485	3.99597
133.4	2.83508	2.63977	5.10559	3.68347	7.41882	5.39246	4.12109	6.76636	6.59363	3.99109
133.5	2.78625	2.63367	5.10559	3.67432	7.40967	5.37415	4.12842	6.75293	6.56799	3.9978
133.6	2.82898	2.60315	5.09033	3.67737	7.38831	5.38635	4.12598	6.7688	6.58386	4.01062
133.7	2.81372	2.63977	5.09033	3.68042	7.40356	5.3833	4.13025	6.76392	6.58203	3.99414
133.8	2.86255	2.63062	5.10864	3.68042	7.41577	5.38635	4.12292	6.76514	6.58447	3.99109
133.9	2.81372	2.63367	5.10254	3.67126	7.41882	5.39246	4.12292	6.7511	6.57654	4.00391
134	2.82898	2.60315	5.09644	3.69263	7.38525	5.3894	4.11865	6.75415	6.58081	3.9917
134.1	2.82288	2.65198	5.07813	3.68042	7.40051	5.36499	4.12048	6.75842	6.57654	4.0094
134.2	2.81067	2.63367	5.11169	3.66821	7.39136	5.36499	4.12354	6.76086	6.57898	4.00085
134.3	2.83508	2.63977	5.09644	3.68652	7.3822	5.40161	4.12781	6.75293	6.56982	3.99841
134.4	2.79846	2.64587	5.09338	3.68652	7.38525	5.3833	4.12231	6.75049	6.57654	3.99475
134.5	2.82593	2.62756	5.09644	3.69873	7.40662	5.3772	4.13635	6.74561	6.58081	4.00085
134.6	2.80151	2.63977	5.11475	3.67126	7.39746	5.39246	4.12231	6.74377	6.58569	4.00452
134.7	2.82898	2.64893	5.11169	3.69263	7.38525	5.38635	4.1333	6.75232	6.57532	4.0094
134.8	2.81677	2.62146	5.09949	3.68042	7.38525	5.37415	4.14307	6.7572	6.56738	3.98804
134.9	2.79236	2.63062	5.10254	3.69873	7.3761	5.37415	4.12537	6.74194	6.56799	3.99475
135	2.81982	2.66113	5.08423	3.68958	7.39746	5.40161	4.12964	6.74316	6.5625	4.00208
135.1	2.81982	2.64893	5.10254	3.68042	7.38525	5.38635	4.11987	6.73584	6.57227	4.01428
135.2	2.84119	2.64282	5.11475	3.70483	7.38831	5.40161	4.13269	6.74377	6.56006	4.021
135.3	2.80151	2.63062	5.09949	3.68958	7.37305	5.3894	4.14124	6.74744	6.55945	4.00757
135.4	2.84424	2.63062	5.09644	3.69873	7.3761	5.39856	4.13269	6.75903	6.56189	3.99658
135.5	2.79236	2.62756	5.12085	3.68347	7.35779	5.3833	4.14185	6.75659	6.57288	4.00391
135.6	2.82593	2.62756	5.10559	3.69568	7.3761	5.3894	4.12354	6.75293	6.56921	4.00696
135.7	2.81982	2.64893	5.09644	3.67737	7.3761	5.3833	4.13635	6.74622	6.55701	4.0094
135.8	2.84729	2.6123	5.1178	3.70178	7.39136	5.39551	4.14673	6.74377	6.56982	4.00269
135.9	2.80762	2.63062	5.08728	3.70789	7.3822	5.38635	4.14368	6.74744	6.55701	4.00635
136	2.81067	2.61841	5.10559	3.68652	7.3822	5.3894	4.12598	6.73889	6.56311	4.00391
136.1	2.82593	2.63062	5.09033	3.69568	7.38525	5.40771	4.12781	6.75049	6.56494	4.01001
136.2	2.81067	2.64282	5.11475	3.69263	7.37	5.39246	4.13818	6.75293	6.55884	4.01184
136.3	2.81677	2.62756	5.07813	3.69873	7.36389	5.37109	4.13696	6.74866	6.55212	4.0094
136.4	2.81982	2.63062	5.10254	3.71704	7.36084	5.39246	4.1333	6.74744	6.55579	4.00574
136.5	2.80457	2.61536	5.09033	3.69568	7.35474	5.39246	4.12903	6.74011	6.56311	4.01489
136.6	2.82898	2.64282	5.08728	3.71704	7.36694	5.40771	4.13574	6.74683	6.55334	4.01611
136.7	2.81677	2.62756	5.09033	3.69568	7.35779	5.40161	4.14429	6.74805	6.56433	4.01001
136.8	2.81372	2.63977	5.09644	3.69873	7.36694	5.39246	4.1217	6.74438	6.55823	4.00818
136.9	2.81982	2.63367	5.09033	3.7262	7.35779	5.39246	4.14978	6.73218	6.55518	4.01062
137	2.80762	2.59705	5.10254	3.69873	7.35779	5.3894	4.13086	6.74133	6.55701	4.01733
137.1	2.79236	2.62756	5.09949	3.7262	7.34253	5.39856	4.14063	6.745	6.55823	4.02405
137.2	2.83813	2.59094	5.10559	3.71094	7.36084	5.41382	4.13513	6.74072	6.53687	4.01184
137.3	2.80457	2.65198	5.1178	3.69873	7.36694	5.39246	4.14734	6.73889	6.55701	4.0033
137.4	2.83813	2.66113	5.09338	3.69873	7.37915	5.40466	4.15955	6.73645	6.54602	4.01062
137.5	2.80151	2.62756	5.09644	3.72314	7.34863	5.39856	4.12903	6.7395	6.55457	4.00757
137.6	2.81372	2.62756	5.1178	3.71399	7.35779	5.40466	4.13818	6.74377	6.54419	4.021
137.7	2.81982	2.62146	5.08423	3.72009	7.34863	5.39856	4.1449	6.7334	6.54358	4.01245
137.8	2.78931	2.62756	5.09338	3.7262	7.34863	5.41077	4.13757	6.74072	6.54724	4.02039
137.9	2.80151	2.61841	5.07202	3.71094	7.3761	5.40466	4.14978	6.74194	6.55518	4.01428
138	2.81982	2.63672	5.09644	3.71399	7.36389	5.40466	4.14795	6.72913	6.55273	4.01672
138.1	2.81372	2.63977	5.10864	3.75061	7.35168	5.40771	4.14368	6.73523	6.54968	4.01306
138.2	2.78625	2.63977	5.09644	3.71399	7.33643	5.40161	4.14124	6.74011	6.54968	4.03381
138.3	2.81067	2.61536	5.08118	3.7262	7.35779	5.40771	4.15466	6.74988	6.54358	4.01123
138.4	2.81982	2.63672	5.09338	3.7323	7.33337	5.41077	4.13574	6.73828	6.54419	4.02283
138.5	2.82288	2.62451	5.08118	3.74146	7.36084	5.41077	4.13757	6.74072	6.5509	4.02649
138.6	2.7832	2.61536	5.10254	3.72314	7.34558	5.38635	4.15344	6.73462	6.53992	4.02344
138.7	2.8595	2.62756	5.08423	3.74451	7.35779	5.40771	4.14063	6.73523	6.53442	4.01978
138.8	2.80151	2.62756	5.05066	3.7384	7.33643	5.41077	4.15222	6.72119	6.54541	4.02527
138.9	2.79236	2.62756	5.07813	3.74756	7.34558	5.38635	4.14917	6.7334	6.54297	4.02283
139	2.78015	2.65198	5.09949	3.74146	7.35474	5.39551	4.16565	6.74622	6.54968	4.01611
139.1	2.82288	2.61841	5.09033	3.73535	7.34253	5.41382	4.14917	6.7157	6.54175	4.01917
139.2	2.78625	2.65198	5.08423	3.75061	7.35168	5.42908	4.14673	6.72791	6.55151	4.0271
139.3	2.81677	2.62451	5.09033	3.73535	7.36389	5.42297	4.14246	6.72974	6.54053	4.01794
139.4	2.81067	2.6062	5.08118	3.74756	7.34253	5.42297	4.15344	6.72363	6.5387	4.02893
139.5	2.81372	2.62146	5.09949	3.75671	7.35168	5.40771	4.15466	6.72302	6.54175	4.02588
139.6	2.79541	2.64893	5.09338	3.7323	7.33032	5.41382	4.15955	6.73523	6.53259	4.02344
139.7	2.80762	2.63977	5.07813	3.7384	7.33948	5.42603	4.15039	6.72302	6.52771	4.02405
139.8	2.81677	2.62146	5.10254	3.75061	7.33643	5.40771	4.15833	6.73035	6.5448	4.02039
139.9	2.78931	2.61841	5.05371	3.74146	7.34253	5.40771	4.15161	6.72852	6.52527	4.02588
140	2.80762	2.66113	5.09644	3.74756	7.36389	5.42908	4.13513	6.73523	6.53503	4.02954
140.1	2.7832	2.63672	5.11169	3.76282	7.33948	5.41992	4.14978	6.72241	6.53625	4.01917
140.2	2.82593	2.62451	5.07507	3.75061	7.33948	5.43213	4.16138	6.72119	6.52649	4.02405
140.3	2.77405	2.6123	5.10864	3.74146	7.35168	5.41382	4.16077	6.73096	6.53687	4.03259
140.4	2.82288	2.65503	5.07507	3.76282	7.31506	5.43213	4.16199	6.73035	6.52588	4.02405
140.5	2.7832	2.63672	5.07507	3.76587	7.32727	5.40771	4.14612	6.72729	6.52771	4.03015
140.6	2.75574	2.62146	5.07507	3.75977	7.34558	5.42603	4.16748	6.70166	6.52039	4.03381
140.7	2.79846	2.63367	5.09644	3.75977	7.37	5.42297	4.15771	6.72729	6.52588	4.02344
140.8	2.78015	2.61841	5.08118	3.78113	7.32117	5.40466	4.15833	6.71326	6.53931	4.02832
140.9	2.80457	2.65198	5.07813	3.74756	7.33337	5.42908	4.1571	6.72607	6.53076	4.03076
141	2.80762	2.58484	5.07202	3.77197	7.32422	5.42297	4.16748	6.71875	6.53625	4.03931
141.1	2.75269	2.65808	5.06287	3.76587	7.35779	5.43213	4.17053	6.71997	6.5332	4.03442
141.2	2.79236	2.60925	5.07507	3.77197	7.34863	5.41687	4.16687	6.72119	6.52283	4.03503
141.3	2.80151	2.63672	5.05066	3.77197	7.33643	5.42603	4.16931	6.71631	6.52588	4.04907
141.4	2.78625	2.63367	5.05981	3.76282	7.32727	5.43823	4.1748	6.71753	6.52771	4.03748
141.5	2.76794	2.64282	5.06287	3.76892	7.34863	5.41077	4.16809	6.72302	6.53564	4.03748
141.6	2.78931	2.63062	5.06287	3.77197	7.33948	5.41992	4.16748	6.7218	6.53625	4.03931
141.7	2.80151	2.64282	5.06592	3.76892	7.30591	5.42908	4.17175	6.71631	6.53137	4.03809
141.8	2.7832	2.63062	5.07202	3.78113	7.34558	5.43213	4.17542	6.71448	6.52222	4.02893
141.9	2.80762	2.64282	5.05981	3.76587	7.34863	5.43823	4.1748	6.70532	6.53442	4.03748
142	2.79541	2.60315	5.06592	3.78723	7.32727	5.43823	4.1748	6.71387	6.53381	4.03748
142.1	2.79236	2.65503	5.05676	3.77197	7.33948	5.42603	4.16992	6.71204	6.5387	4.04236
142.2	2.78625	2.65198	5.07813	3.77808	7.33948	5.43518	4.16931	6.7157	6.53809	4.04114
142.3	2.79541	2.63977	5.06592	3.76282	7.32422	5.45654	4.16687	6.71448	6.52039	4.04968
142.4	2.80151	2.6123	5.06592	3.77197	7.32422	5.42297	4.17603	6.70166	6.52466	4.04968
142.5	2.79846	2.60315	5.05676	3.79028	7.33032	5.43823	4.1687	6.71143	6.53625	4.0387
142.6	2.74658	2.65503	5.06897	3.78113	7.33643	5.42297	4.17175	6.70532	6.51917	4.04968
142.7	2.82898	2.63977	5.06592	3.78113	7.33948	5.45044	4.18213	6.70654	6.52466	4.04602
142.8	2.79236	2.60925	5.08423	3.77502	7.33643	5.43213	4.17419	6.71021	6.5332	4.04907
142.9	2.76184	2.62146	5.06287	3.78113	7.31201	5.42603	4.17419	6.70776	6.52954	4.05334
143	2.82898	2.60315	5.06592	3.78723	7.33032	5.45044	4.17114	6.70654	6.52649	4.0625
143.1	2.75879	2.64587	5.06592	3.79028	7.34558	5.43213	4.1925	6.72119	6.52649	4.04724
143.2	2.75879	2.59705	5.05676	3.80249	7.34558	5.45349	4.16992	6.70532	6.53442	4.0448
143.3	2.79846	2.63977	5.06897	3.78418	7.32117	5.43823	4.17969	6.70471	6.52893	4.05334
143.4	2.7771	2.64893	5.04761	3.79028	7.33032	5.44434	4.1864	6.69922	6.53503	4.05396
143.5	2.78625	2.64587	5.06592	3.79028	7.33643	5.45349	4.1803	6.70349	6.52283	4.06067
143.6	2.77405	2.63672	5.04761	3.8147	7.34253	5.45349	4.18152	6.69617	6.52832	4.05579
143.7	2.81067	2.64587	5.06897	3.77808	7.34863	5.45654	4.19128	6.68945	6.51794	4.0509
143.8	2.7832	2.62451	5.07202	3.79944	7.33337	5.43823	4.18701	6.698	6.50818	4.05701
143.9	2.78625	2.61841	5.04761	3.80859	7.33643	5.45044	4.18762	6.69617	6.52588	4.05945
144	2.78015	2.64282	5.05676	3.80859	7.32117	5.45959	4.19495	6.68274	6.51611	4.05884
144.1	2.7832	2.62756	5.07813	3.79639	7.33337	5.4718	4.19312	6.68701	6.53503	4.05945
144.2	2.7832	2.62451	5.06287	3.79944	7.32727	5.45349	4.17786	6.69067	6.52527	4.06311
144.3	2.7832	2.6001	5.05981	3.80859	7.32727	5.45044	4.18945	6.69434	6.52466	4.06067
144.4	2.78625	2.63672	5.08423	3.78723	7.31812	5.46265	4.19128	6.69434	6.52161	4.05884
144.5	2.771	2.64893	5.06897	3.80859	7.30591	5.45959	4.19739	6.69983	6.52954	4.06067
144.6	2.78625	2.65503	5.08118	3.79944	7.33948	5.46875	4.198	6.6864	6.52588	4.0686
144.7	2.771	2.6062	5.07813	3.79944	7.32422	5.4657	4.20105	6.70593	6.52527	4.06555
144.8	2.77405	2.65503	5.05676	3.8147	7.31201	5.44128	4.20776	6.69495	6.52771	4.05884
144.9	2.7832	2.6001	5.07507	3.80859	7.35779	5.46265	4.19922	6.68823	6.51611	4.06555
145	2.79541	2.63062	5.06592	3.80859	7.34253	5.45654	4.19678	6.69861	6.52771	4.07227
145.1	2.78625	2.64893	5.06897	3.81165	7.34558	5.45959	4.19983	6.68701	6.52649	4.06799
145.2	2.81372	2.63062	5.06287	3.81775	7.33643	5.45044	4.20715	6.69067	6.52344	4.07104
145.3	2.75879	2.61536	5.06592	3.80249	7.33337	5.4657	4.20776	6.6925	6.52893	4.06555
145.4	2.80457	2.63672	5.07813	3.82385	7.32727	5.45959	4.20654	6.69067	6.53015	4.07837
145.5	2.80762	2.63672	5.08118	3.8208	7.31201	5.46875	4.21204	6.69128	6.53748	4.07166
145.6	2.771	2.63977	5.06897	3.81775	7.32727	5.4718	4.21082	6.68701	6.53625	4.07959
145.7	2.81067	2.61841	5.07813	3.8208	7.31201	5.4657	4.21204	6.68396	6.53564	4.08447
145.8	2.78625	2.64893	5.06897	3.82385	7.31812	5.46875	4.20837	6.68091	6.52832	4.07532
145.9	2.76794	2.66724	5.07813	3.8208	7.33032	5.4718	4.22607	6.68213	6.52527	4.08691
146	2.80762	2.6123	5.06897	3.80859	7.34558	5.49316	4.21875	6.69128	6.54297	4.0863
146.1	2.78931	2.66418	5.08423	3.83301	7.33032	5.45959	4.20959	6.68945	6.53748	4.07837
146.2	2.771	2.62146	5.07202	3.8269	7.32117	5.45654	4.21753	6.67908	6.5332	4.07471
146.3	2.78931	2.59399	5.07813	3.82996	7.32422	5.46265	4.21082	6.68213	6.52954	4.08447
146.4	2.80151	2.64587	5.06897	3.83606	7.30591	5.47485	4.21753	6.68701	6.5387	4.08386
146.5	2.76794	2.64282	5.07507	3.8269	7.32117	5.47791	4.21021	6.66809	6.52893	4.09302
146.6	2.78625	2.63977	5.09338	3.83301	7.34558	5.46875	4.22302	6.68335	6.53564	4.09119
146.7	2.78015	2.63977	5.08118	3.83301	7.32117	5.45654	4.22668	6.66931	6.53687	4.07959
146.8	2.771	2.60315	5.08423	3.81775	7.31812	5.4718	4.2218	6.67908	6.53137	4.09058
146.9	2.79236	2.62756	5.08728	3.84216	7.34253	5.48706	4.24255	6.69006	6.53381	4.09485
147	2.76489	2.63977	5.09033	3.8147	7.33032	5.47791	4.23157	6.67847	6.52344	4.09546
147.1	2.76794	2.6062	5.09644	3.83911	7.31812	5.46875	4.21997	6.67725	6.54602	4.09302
147.2	2.7771	2.65198	5.09033	3.82996	7.30591	5.45654	4.22363	6.68396	6.53015	4.09241
147.3	2.81677	2.64893	5.09033	3.84521	7.32727	5.50842	4.23218	6.67847	6.52039	4.09363
147.4	2.7771	2.6123	5.11169	3.83606	7.35779	5.49927	4.2218	6.67175	6.53137	4.09119
147.5	2.7832	2.64587	5.07507	3.84827	7.30591	5.47791	4.23279	6.67236	6.52771	4.09241
147.6	2.79846	2.62756	5.10559	3.83911	7.34253	5.47485	4.22913	6.68518	6.52161	4.09302
147.7	2.78625	2.6123	5.09644	3.83606	7.31201	5.49316	4.23523	6.67542	6.54236	4.09119
147.8	2.80151	2.64893	5.09949	3.86047	7.32117	5.49316	4.24072	6.67664	6.52283	4.10217
147.9	2.81372	2.6123	5.10864	3.83911	7.32727	5.48401	4.23218	6.67114	6.53442	4.09241
148	2.771	2.6001	5.09644	3.83301	7.31506	5.48096	4.23889	6.67725	6.53503	4.104
148.1	2.79846	2.61536	5.10559	3.83911	7.33643	5.48096	4.22668	6.6626	6.52771	4.10339
148.2	2.76489	2.64282	5.10864	3.86047	7.31201	5.48401	4.22668	6.67542	6.53687	4.10461
148.3	2.78931	2.6123	5.12085	3.83606	7.31506	5.48401	4.25232	6.67603	6.54175	4.11011
148.4	2.79541	2.63367	5.08118	3.85742	7.35779	5.48401	4.245	6.66382	6.54114	4.10706
148.5	2.74963	2.6062	5.11169	3.85437	7.32117	5.48096	4.23462	6.67542	6.54663	4.10645
148.6	2.82593	2.65503	5.09949	3.84827	7.31812	5.47485	4.23035	6.68152	6.53259	4.11987
148.7	2.80762	2.61536	5.10864	3.84827	7.31201	5.47791	4.24194	6.67175	6.54602	4.11926
148.8	2.7771	2.65198	5.10254	3.86353	7.33643	5.49316	4.24194	6.67603	6.53992	4.11011
148.9	2.76184	2.63367	5.1178	3.86047	7.31812	5.48096	4.24133	6.67847	6.54724	4.11072
149	2.81677	2.60925	5.10254	3.86047	7.32727	5.48706	4.24133	6.67419	6.53564	4.10828
149.1	2.78625	2.66113	5.10864	3.85132	7.31506	5.48401	4.24988	6.66992	6.53442	4.11194
149.2	2.77405	2.61536	5.13916	3.84216	7.33337	5.49927	4.24683	6.67969	6.5387	4.11255
149.3	2.78931	2.63367	5.13306	3.85742	7.30896	5.50232	4.24377	6.67969	6.53381	4.11377
149.4	2.81067	2.63977	5.12695	3.86353	7.33337	5.48706	4.23889	6.67969	6.53809	4.11255
149.5	2.7832	2.6001	5.15137	3.86658	7.32422	5.48706	4.23889	6.68457	6.53442	4.11133
149.6	2.7771	2.60925	5.13	3.84827	7.31506	5.49622	4.25354	6.66626	6.53687	4.11865
149.7	2.80151	2.64282	5.13611	3.86353	7.31201	5.49927	4.24622	6.68274	6.53198	4.12109
149.8	2.79541	2.6062	5.13	3.86047	7.35168	5.49316	4.24866	6.67358	6.54297	4.11316
149.9	2.76489	2.62756	5.12695	3.86963	7.32727	5.49622	4.24377	6.68884	6.53564	4.11377
150	2.7832	2.63672	5.14526	3.86963	7.32727	5.50232	4.25903	6.67542	6.5387	4.11621
150.1	2.77405	2.64282	5.14221	3.87268	7.33032	5.50537	4.25354	6.68762	6.53381	4.1272
150.2	2.75879	2.63672	5.13916	3.85437	7.31812	5.48706	4.25171	6.65955	6.53564	4.11926
150.3	2.79236	2.63367	5.13	3.87268	7.33643	5.49011	4.25049	6.66992	6.52405	4.11926
150.4	2.77405	2.63062	5.12695	3.86963	7.31812	5.50537	4.25354	6.67786	6.54602	4.11926
150.5	2.75879	2.62146	5.13916	3.86353	7.33643	5.50537	4.24744	6.6748	6.5332	4.12231
150.6	2.76489	2.63062	5.14526	3.87878	7.32727	5.50537	4.25232	6.67114	6.53931	4.12659
150.7	2.76489	2.63062	5.14221	3.88794	7.29675	5.49316	4.2572	6.67725	6.53137	4.13635
150.8	2.771	2.64282	5.16052	3.87268	7.32727	5.50537	4.25476	6.67175	6.53564	4.1217
150.9	2.76794	2.63977	5.13306	3.86963	7.33032	5.51453	4.25476	6.67236	6.53259	4.12537
151	2.78015	2.64282	5.14832	3.89099	7.30896	5.49927	4.2572	6.6626	6.52405	4.1217
151.1	2.79541	2.62451	5.15137	3.88794	7.33643	5.50232	4.25842	6.66504	6.53931	4.1333
151.2	2.771	2.63367	5.14832	3.88794	7.32422	5.50842	4.26086	6.67419	6.53015	4.12109
151.3	2.80762	2.60925	5.14221	3.88184	7.31812	5.49316	4.25964	6.67603	6.53442	4.11804
151.4	2.78931	2.62756	5.16357	3.87573	7.33032	5.51147	4.25476	6.67236	6.53137	4.12659
151.5	2.77405	2.60925	5.15137	3.88489	7.31506	5.51758	4.25964	6.66748	6.53076	4.11316
151.6	2.76794	2.64893	5.15137	3.88794	7.32727	5.52063	4.27124	6.66504	6.52161	4.12781
151.7	2.79236	2.6123	5.14526	3.87878	7.32422	5.51147	4.25476	6.6748	6.52832	4.12598
151.8	2.75879	2.63977	5.16968	3.88794	7.31812	5.50842	4.26025	6.66931	6.53259	4.12537
151.9	2.76184	2.62756	5.14221	3.88184	7.32727	5.50537	4.2572	6.67603	6.52161	4.11499
152	2.78015	2.60925	5.16663	3.88489	7.32422	5.50537	4.25476	6.66565	6.5271	4.14001
152.1	2.74353	2.66113	5.14832	3.89099	7.33948	5.52063	4.27673	6.68152	6.51062	4.13147
152.2	2.78015	2.59705	5.16663	3.88184	7.32727	5.50842	4.24683	6.67358	6.52283	4.12537
152.3	2.80762	2.62146	5.16968	3.90625	7.33032	5.49622	4.26941	6.67053	6.53198	4.14368
152.4	2.7771	2.63062	5.16052	3.89099	7.32422	5.49011	4.26331	6.68213	6.53442	4.1217
152.5	2.78931	2.63672	5.17578	3.89404	7.32422	5.51147	4.25781	6.69006	6.52466	4.14429
152.6	2.75574	2.65503	5.17273	3.91541	7.30896	5.51453	4.26331	6.66565	6.521	4.12964
152.7	2.76489	2.64893	5.15137	3.91235	7.32422	5.50537	4.26453	6.67114	6.53259	4.13452
152.8	2.76489	2.57874	5.16357	3.88489	7.33032	5.51453	4.26758	6.68213	6.52893	4.13574
152.9	2.78931	2.64282	5.16357	3.89099	7.32727	5.52063	4.25842	6.67297	6.52466	4.1217
153	2.75574	2.64893	5.18494	3.91235	7.31812	5.52368	4.26208	6.66565	6.51917	4.14368
153.1	2.7832	2.60315	5.16052	3.91541	7.31506	5.50842	4.25964	6.67603	6.52283	4.13879
153.2	2.771	2.63062	5.16968	3.89404	7.32727	5.52673	4.26575	6.67786	6.52344	4.1394
153.3	2.78931	2.65808	5.17883	3.92151	7.31506	5.52979	4.26575	6.66504	6.53931	4.14673
153.4	2.78015	2.61536	5.16052	3.89099	7.31201	5.51453	4.26331	6.66504	6.52893	4.13147
153.5	2.76794	2.62146	5.16663	3.92151	7.30896	5.52063	4.26575	6.67114	6.53748	4.13452
153.6	2.78625	2.64893	5.16357	3.91541	7.31506	5.52673	4.26514	6.67664	6.51794	4.14063
153.7	2.76184	2.61536	5.16357	3.89709	7.33643	5.52673	4.26025	6.67969	6.53442	4.1449
153.8	2.79846	2.65808	5.19104	3.92151	7.30896	5.51758	4.27063	6.66992	6.5094	4.13696
153.9	2.771	2.62451	5.16052	3.92456	7.31201	5.51758	4.27307	6.67114	6.5271	4.14612
154	2.74353	2.65503	5.18494	3.90625	7.32117	5.54199	4.25842	6.67358	6.51611	4.1394
154.1	2.7832	2.66113	5.18799	3.9093	7.31201	5.53589	4.25537	6.67053	6.52466	4.14429
154.2	2.78015	2.64587	5.16357	3.91846	7.32117	5.52368	4.26392	6.66687	6.521	4.14307
154.3	2.79846	2.62146	5.17578	3.91541	7.32422	5.54199	4.26331	6.66687	6.51672	4.14368
154.4	2.76184	2.62756	5.17883	3.91846	7.31201	5.51453	4.27185	6.68152	6.52161	4.14307
154.5	2.7771	2.62146	5.16663	3.93372	7.31201	5.53284	4.26758	6.6748	6.52039	4.13635
154.6	2.74658	2.64893	5.18188	3.91541	7.31812	5.53589	4.27612	6.68152	6.51855	4.14551
154.7	2.78931	2.63672	5.16663	3.91846	7.32727	5.53894	4.27246	6.67419	6.51428	4.1449
154.8	2.79541	2.61536	5.16052	3.9093	7.33032	5.54199	4.27002	6.67664	6.52649	4.13086
154.9	2.75879	2.65808	5.17883	3.92761	7.32727	5.53284	4.27673	6.6748	6.51184	4.14368
155	2.78015	2.6123	5.16968	3.93677	7.33337	5.54504	4.27124	6.68762	6.52771	4.13879
155.1	2.75269	2.64282	5.18494	3.93372	7.32117	5.52368	4.27612	6.66931	6.51733	4.15039
155.2	2.74353	2.63672	5.16663	3.93372	7.31201	5.52979	4.27063	6.6748	6.51123	4.14673
155.3	2.79846	2.63367	5.17273	3.93066	7.32422	5.53589	4.27673	6.6748	6.52405	4.14246
155.4	2.74048	2.62451	5.16357	3.95508	7.32422	5.55725	4.26758	6.67542	6.51306	4.14185
155.5	2.76184	2.61536	5.17273	3.94287	7.32727	5.52368	4.26086	6.67358	6.51794	4.14124
155.6	2.77405	2.6062	5.16968	3.95508	7.30896	5.53284	4.2749	6.67664	6.51428	4.15039
155.7	2.78931	2.63062	5.17273	3.93372	7.33337	5.53894	4.27673	6.66748	6.51611	4.15894
155.8	2.76184	2.64282	5.16663	3.93982	7.31812	5.52979	4.27185	6.66321	6.51367	4.15039
155.9	2.75269	2.62451	5.17273	3.94287	7.33032	5.54504	4.2804	6.67114	6.51733	4.14429
156	2.77405	2.66724	5.18494	3.93372	7.32727	5.55725	4.28223	6.66443	6.51001	4.14612
156.1	2.77405	2.62451	5.16052	3.94897	7.2998	5.56946	4.27368	6.66809	6.50574	4.14551
156.2	2.78931	2.60315	5.19409	3.94287	7.31201	5.54504	4.27612	6.66809	6.51245	4.14246
156.3	2.75879	2.65808	5.16663	3.94897	7.32422	5.53894	4.28162	6.67419	6.51123	4.15344
156.4	2.78625	2.63367	5.17883	3.94897	7.32727	5.57251	4.27979	6.67542	6.51001	4.15588
156.5	2.76794	2.63977	5.18494	3.94897	7.2998	5.53894	4.28467	6.67053	6.51489	4.14612
156.6	2.77405	2.65808	5.17273	3.95813	7.33643	5.53894	4.27612	6.6748	6.51184	4.15222
156.7	2.73743	2.62451	5.16663	3.94897	7.31506	5.5542	4.27246	6.67542	6.51428	4.14429
156.8	2.78931	2.64282	5.17273	3.95508	7.33032	5.54199	4.28162	6.65833	6.50635	4.15039
156.9	2.79236	2.62756	5.16968	3.94897	7.31201	5.5481	4.29199	6.67786	6.50024	4.1626
157	2.771	2.66113	5.19104	3.95508	7.32117	5.5603	4.28467	6.66199	6.51611	4.15527
157.1	2.7771	2.65503	5.16663	3.95813	7.32422	5.54504	4.2804	6.66809	6.50208	4.14795
157.2	2.81677	2.6062	5.16052	3.95508	7.32422	5.55115	4.2804	6.66687	6.51611	4.14612
157.3	2.76794	2.62451	5.16052	3.95203	7.31812	5.54199	4.28833	6.66687	6.51245	4.14978
157.4	2.75574	2.64587	5.17578	3.97339	7.31506	5.54199	4.28528	6.66382	6.51245	4.15222
157.5	2.78015	2.65503	5.18494	3.95813	7.31201	5.5542	4.28711	6.67358	6.49963	4.15894
157.6	2.76184	2.66113	5.14526	3.94592	7.31506	5.55725	4.28467	6.67419	6.5155	4.14673
157.7	2.76489	2.61841	5.15137	3.96118	7.30896	5.53589	4.29199	6.66748	6.50635	4.15527
157.8	2.79846	2.63367	5.17883	3.96118	7.33032	5.5542	4.28833	6.66626	6.5033	4.14978
157.9	2.75574	2.63977	5.14221	3.97034	7.31201	5.5481	4.28772	6.66809	6.49902	4.1687
158	2.78931	2.64893	5.17273	3.97644	7.31201	5.56335	4.28101	6.65833	6.49475	4.16016
158.1	2.77405	2.66418	5.15137	3.94592	7.32727	5.55725	4.2926	6.65344	6.51306	4.15039
158.2	2.75879	2.63977	5.17273	3.94897	7.32422	5.5481	4.29199	6.67603	6.52039	4.16199
158.3	2.79541	2.65808	5.15442	3.95813	7.31201	5.5603	4.29749	6.65955	6.49963	4.15955
158.4	2.77405	2.62756	5.15137	3.97339	7.30896	5.55115	4.28589	6.66504	6.49963	4.16321
158.5	2.76794	2.62451	5.16663	3.97034	7.31506	5.54504	4.30847	6.67114	6.4978	4.16199
158.6	2.72522	2.64893	5.14832	3.96118	7.34558	5.56641	4.28833	6.67236	6.49963	4.16138
158.7	2.76184	2.62146	5.17273	3.97644	7.33337	5.54199	4.30054	6.66443	6.5094	4.16443
158.8	2.76794	2.63062	5.14832	3.9856	7.29675	5.56335	4.30298	6.66748	6.51428	4.16321
158.9	2.81372	2.64587	5.16968	3.97339	7.32422	5.55115	4.29443	6.67175	6.51184	4.15771
159	2.75574	2.61841	5.16052	3.9917	7.32117	5.5603	4.2981	6.66321	6.5094	4.17236
159.1	2.78931	2.63977	5.15442	3.97034	7.30896	5.5542	4.30725	6.64917	6.50391	4.16443
159.2	2.7832	2.63062	5.15442	3.96729	7.32727	5.57251	4.29626	6.6626	6.51245	4.16321
159.3	2.75879	2.64587	5.15442	3.94592	7.32422	5.5481	4.30481	6.66687	6.50818	4.16443
159.4	2.78015	2.64587	5.16052	3.9917	7.30896	5.56335	4.2981	6.66687	6.51123	4.17236
159.5	2.78015	2.6123	5.16052	3.97644	7.33643	5.56946	4.29749	6.65649	6.50208	4.16809
159.6	2.76794	2.64282	5.14832	3.97949	7.31812	5.56335	4.29626	6.65649	6.51062	4.16992
159.7	2.78625	2.63062	5.16052	3.97949	7.31201	5.56641	4.31213	6.66077	6.51062	4.17358
159.8	2.74658	2.65198	5.16052	3.98865	7.32727	5.56335	4.30664	6.66138	6.51062	4.16687
159.9	2.76184	2.62756	5.15747	3.98254	7.31812	5.57251	4.30725	6.64307	6.50818	4.17297
160	2.79236	2.62451	5.15442	3.98865	7.30896	5.5542	4.31091	6.65955	6.50879	4.17603
160.1	2.75879	2.61536	5.15747	3.98865	7.32727	5.53284	4.30847	6.66321	6.49719	4.18152
160.2	2.7832	2.62451	5.14526	3.9917	7.33032	5.56946	4.30908	6.66687	6.50085	4.18518
160.3	2.74658	2.63367	5.16052	3.9917	7.32422	5.5603	4.30359	6.65771	6.50757	4.17969
160.4	2.771	2.65198	5.13916	3.9856	7.33032	5.58167	4.31458	6.6449	6.51001	4.18152
160.5	2.76794	2.60315	5.16968	3.99475	7.32117	5.57251	4.31335	6.65283	6.50879	4.17053
160.6	2.7771	2.63367	5.16357	3.9917	7.31506	5.57556	4.3103	6.64795	6.51733	4.18335
160.7	2.75574	2.65198	5.13916	3.9856	7.31812	5.59998	4.31885	6.64734	6.50757	4.18823
160.8	2.76184	2.66418	5.14526	3.9856	7.31812	5.56335	4.30847	6.64246	6.51611	4.18213
160.9	2.78015	2.63062	5.15747	3.9978	7.33643	5.57861	4.31641	6.65466	6.51428	4.17847
161	2.79541	2.61536	5.15137	4.00085	7.31201	5.57556	4.32251	6.63635	6.51001	4.18152
161.1	2.77405	2.63367	5.16663	3.97644	7.32727	5.58777	4.32129	6.65894	6.50757	4.19067
161.2	2.7832	2.63672	5.16968	3.9917	7.31812	5.5603	4.32251	6.64795	6.50574	4.18213
161.3	2.78015	2.63977	5.17883	4.01306	7.30896	5.58777	4.32007	6.64612	6.50635	4.19556
161.4	2.75574	2.60925	5.14832	3.99475	7.33337	5.57556	4.32007	6.64063	6.51672	4.19983
161.5	2.78015	2.6123	5.14832	4.00085	7.34253	5.56641	4.32861	6.65405	6.50269	4.19495
161.6	2.7832	2.6062	5.16052	4.01306	7.31506	5.57556	4.32495	6.64124	6.50574	4.198
161.7	2.7771	2.64587	5.15442	3.99475	7.32422	5.57556	4.32861	6.65344	6.50024	4.19373
161.8	2.771	2.61536	5.17578	4.00085	7.31201	5.56946	4.32983	6.64612	6.51306	4.19067
161.9	2.78625	2.63367	5.16357	4.00696	7.32117	5.57556	4.33594	6.64063	6.51489	4.20532
162	2.771	2.64282	5.16663	4.00391	7.33032	5.57556	4.32678	6.63513	6.51123	4.198
162.1	2.75269	2.64282	5.15747	3.9856	7.34558	5.56335	4.32373	6.65405	6.50085	4.19373
162.2	2.75879	2.61536	5.16968	3.9917	7.32422	5.57861	4.33411	6.6449	6.52161	4.19983
162.3	2.76794	2.64587	5.18188	4.00085	7.32727	5.58777	4.33167	6.64612	6.51367	4.20227
162.4	2.78015	2.64587	5.16968	4.00696	7.30896	5.58777	4.3396	6.6394	6.51978	4.20166
162.5	2.76794	2.62451	5.17578	4.01611	7.31812	5.57556	4.32983	6.64856	6.51917	4.20837
162.6	2.7832	2.64893	5.17578	4.00696	7.33032	5.57251	4.33655	6.6449	6.51184	4.20349
162.7	2.76184	2.63672	5.18494	4.00391	7.32727	5.59692	4.34021	6.64734	6.51245	4.20471
162.8	2.771	2.62451	5.16357	4.01306	7.32117	5.59692	4.32983	6.63879	6.50452	4.19983
162.9	2.76184	2.63977	5.17578	4.01306	7.32422	5.58167	4.34387	6.63513	6.51428	4.20288
163	2.771	2.65198	5.18799	4.02222	7.33643	5.58777	4.33594	6.64307	6.52893	4.2157
163.1	2.76794	2.62451	5.18188	4.00696	7.32422	5.57861	4.33044	6.63879	6.521	4.20288
163.2	2.771	2.62756	5.16663	4.01611	7.31201	5.59998	4.3457	6.62903	6.51306	4.20288
163.3	2.76794	2.61841	5.18188	4.00696	7.32422	5.56946	4.33167	6.65344	6.51733	4.20715
163.4	2.74658	2.62451	5.18494	4.00391	7.32117	5.60608	4.35059	6.64001	6.51184	4.21021
163.5	2.80762	2.63367	5.17883	4.00696	7.32117	5.58777	4.34692	6.64429	6.50391	4.20959
163.6	2.75574	2.62756	5.18799	4.01306	7.30896	5.58777	4.34753	6.64307	6.51245	4.21082
163.7	2.7832	2.63672	5.18188	4.03137	7.33948	5.59082	4.34509	6.63635	6.51855	4.20166
163.8	2.75879	2.63672	5.20325	4.01306	7.30896	5.59082	4.3512	6.64063	6.51672	4.2157
163.9	2.75269	2.63367	5.18188	4.01306	7.30286	5.59998	4.34937	6.63208	6.52161	4.21875
164	2.78931	2.63367	5.18799	4.03442	7.32117	5.58777	4.34753	6.64673	6.52222	4.21265
164.1	2.74963	2.65198	5.18799	4.01917	7.34253	5.58777	4.36401	6.64368	6.51489	4.21692
164.2	2.76794	2.62146	5.18494	4.01917	7.32422	5.59387	4.35791	6.63574	6.51611	4.22241
164.3	2.73438	2.62756	5.19714	4.02222	7.33032	5.58167	4.35913	6.64673	6.52466	4.20959
164.4	2.75879	2.62146	5.2063	4.02832	7.32727	5.59998	4.35303	6.64795	6.52344	4.21387
164.5	2.7832	2.63062	5.2002	4.01917	7.2998	5.60608	4.35242	6.6394	6.52222	4.23218
164.6	2.73438	2.64587	5.20325	4.02832	7.33337	5.59692	4.35181	6.64246	6.52649	4.21814
164.7	2.79236	2.61841	5.2063	4.02832	7.33032	5.59082	4.35852	6.64307	6.52649	4.22241
164.8	2.74353	2.62146	5.18799	4.01611	7.31201	5.59998	4.35913	6.63879	6.52954	4.22363
164.9	2.75574	2.63977	5.20325	4.03442	7.33032	5.59387	4.36096	6.64551	6.521	4.22668
165	2.77405	2.62146	5.22461	4.01917	7.32117	5.61218	4.35425	6.64429	6.53198	4.22363
165.1	2.76794	2.63977	5.2124	4.03748	7.33337	5.59387	4.34509	6.64368	6.52405	4.22241
165.2	2.74963	2.62146	5.21545	4.03442	7.33032	5.60303	4.35791	6.651	6.52771	4.22546
165.3	2.7771	2.64282	5.18799	4.02222	7.32422	5.57556	4.36584	6.6394	6.521	4.23096
165.4	2.73438	2.63977	5.20325	4.02832	7.32422	5.61829	4.35364	6.62903	6.53442	4.22913
165.5	2.78931	2.63062	5.19714	4.03748	7.31812	5.59692	4.3634	6.63635	6.53381	4.23645
165.6	2.76184	2.63062	5.23376	4.03748	7.32117	5.59998	4.36707	6.64368	6.5271	4.23035
165.7	2.78931	2.63367	5.2002	4.03137	7.32727	5.59387	4.36707	6.6394	6.52649	4.24194
165.8	2.78931	2.62756	5.20935	4.01306	7.34253	5.61829	4.36584	6.65344	6.53564	4.23828
165.9	2.78625	2.63672	5.22156	4.02527	7.31201	5.58472	4.36279	6.63452	6.53137	4.23828
166	2.771	2.62756	5.23071	4.04053	7.32422	5.60303	4.35608	6.64368	6.53259	4.23401
166.1	2.75879	2.62146	5.23376	4.02527	7.33948	5.60303	4.35852	6.64124	6.53076	4.23462
166.2	2.76489	2.61536	5.21851	4.04358	7.31812	5.60608	4.38538	6.63269	6.53259	4.23157
166.3	2.72522	2.61841	5.23682	4.03442	7.32422	5.60913	4.36523	6.63696	6.53259	4.24316
166.4	2.80151	2.64893	5.24597	4.04358	7.34253	5.61523	4.35913	6.62842	6.52344	4.22729
166.5	2.7771	2.61841	5.24902	4.03748	7.32117	5.61218	4.35242	6.65955	6.53931	4.23279
166.6	2.75269	2.65808	5.23376	4.05273	7.33337	5.61218	4.36035	6.64246	6.52832	4.23279
166.7	2.74658	2.63062	5.23987	4.03748	7.33948	5.59692	4.37256	6.63757	6.52954	4.23889
166.8	2.76489	2.63062	5.23987	4.04053	7.31506	5.61829	4.36584	6.64124	6.52771	4.24133
166.9	2.76794	2.63367	5.22461	4.04663	7.33337	5.60913	4.37012	6.63757	6.52893	4.24622
167	2.75574	2.6123	5.23987	4.04053	7.33032	5.61218	4.37134	6.6394	6.52588	4.24316
167.1	2.76489	2.61536	5.2124	4.04663	7.32727	5.61218	4.37012	6.63208	6.52588	4.24316
167.2	2.76184	2.60315	5.23987	4.06189	7.33643	5.60608	4.36157	6.64307	6.53442	4.24561
167.3	2.771	2.64893	5.22766	4.03748	7.33337	5.61218	4.37927	6.64185	6.53625	4.2395
167.4	2.72827	2.62146	5.24902	4.06799	7.32727	5.62744	4.36584	6.63818	6.52954	4.24255
167.5	2.75879	2.64893	5.23376	4.06799	7.32727	5.61829	4.36707	6.63513	6.51611	4.24377
167.6	2.77405	2.64282	5.23987	4.05273	7.33032	5.61829	4.37622	6.63635	6.52039	4.24438
167.7	2.74353	2.62146	5.26733	4.06494	7.33337	5.60608	4.375	6.6626	6.53564	4.25476
167.8	2.75574	2.65808	5.24292	4.06189	7.32727	5.60913	4.37378	6.63269	6.53015	4.2395
167.9	2.76489	2.60925	5.25513	4.04663	7.31506	5.61829	4.37866	6.63391	6.53687	4.24561
168	2.76794	2.62756	5.23987	4.04663	7.33032	5.61218	4.3866	6.6333	6.52466	4.24133
168.1	2.75879	2.62146	5.26123	4.04968	7.33337	5.62744	4.36646	6.64185	6.52344	4.24988
168.2	2.74963	2.62756	5.25208	4.06799	7.31506	5.61829	4.38354	6.64673	6.53076	4.24866
168.3	2.76184	2.62146	5.25208	4.06189	7.31201	5.61218	4.37256	6.64001	6.52527	4.25476
168.4	2.75269	2.63367	5.26733	4.06189	7.34253	5.61829	4.36707	6.64307	6.52588	4.24683
168.5	2.76794	2.63062	5.24292	4.04663	7.33337	5.62134	4.37622	6.64307	6.53076	4.2511
168.6	2.74963	2.63367	5.25818	4.0802	7.34558	5.59998	4.37866	6.63452	6.5271	4.24561
168.7	2.7771	2.65503	5.26733	4.06189	7.31506	5.62134	4.37866	6.64734	6.5332	4.25171
168.8	2.76489	2.6123	5.26123	4.06189	7.31201	5.62744	4.37378	6.65161	6.53259	4.26208
168.9	2.74658	2.64893	5.27039	4.07715	7.31812	5.60913	4.38477	6.64185	6.53076	4.25293
169	2.76794	2.66113	5.26733	4.06494	7.33643	5.61829	4.38477	6.64063	6.52466	4.24744
169.1	2.75574	2.61841	5.26428	4.06189	7.33643	5.61829	4.39026	6.63818	6.52344	4.25537
169.2	2.77405	2.62756	5.25513	4.06494	7.34253	5.60913	4.38232	6.6449	6.53442	4.25842
169.3	2.73743	2.63977	5.24902	4.06189	7.34253	5.61829	4.38477	6.6449	6.51672	4.25049
169.4	2.771	2.63977	5.2887	4.08936	7.33337	5.61829	4.37439	6.64429	6.52466	4.25842
169.5	2.75879	2.62451	5.25513	4.06189	7.33643	5.61829	4.38782	6.6394	6.5271	4.2627
169.6	2.76184	2.59094	5.26123	4.08325	7.33643	5.6427	4.37256	6.65283	6.53442	4.25537
169.7	2.78015	2.63977	5.26123	4.0802	7.32422	5.62744	4.37683	6.64856	6.51978	4.24866
169.8	2.76184	2.64587	5.27039	4.07715	7.33337	5.63049	4.38293	6.63879	6.52161	4.26025
169.9	2.74048	2.61841	5.26428	4.0741	7.33032	5.61218	4.37988	6.64612	6.5155	4.2572
170	2.76184	2.63977	5.24902	4.0802	7.31506	5.63354	4.38538	6.64429	6.51917	4.26025
170.1	2.75574	2.62756	5.27344	4.06494	7.33032	5.62134	4.39758	6.64551	6.52649	4.25171
170.2	2.75269	2.62451	5.24902	4.0741	7.32727	5.63354	4.37866	6.64978	6.5155	4.25781
170.3	2.771	2.66724	5.28564	4.09241	7.31506	5.63965	4.39514	6.66016	6.51672	4.25293
170.4	2.76184	2.6062	5.27649	4.07715	7.32727	5.61218	4.38904	6.65649	6.51672	4.25354
170.5	2.7771	2.6123	5.26123	4.09546	7.34558	5.63049	4.38721	6.65222	6.51184	4.25842
170.6	2.75269	2.65503	5.29175	4.0741	7.33032	5.6366	4.38843	6.64978	6.51489	4.25598
170.7	2.771	2.61536	5.25513	4.0802	7.33032	5.6366	4.37195	6.64551	6.51123	4.26086
170.8	2.76184	2.64282	5.27954	4.08936	7.33643	5.63965	4.37744	6.64063	6.52344	4.25842
170.9	2.7771	2.63672	5.29175	4.0741	7.32727	5.62439	4.38965	6.63879	6.51611	4.25842
171	2.74353	2.61841	5.26428	4.0741	7.33948	5.63965	4.39697	6.64978	6.521	4.25842
171.1	2.77405	2.65503	5.26733	4.07715	7.33337	5.64575	4.3927	6.6571	6.51855	4.26514
171.2	2.78931	2.60315	5.27954	4.09546	7.31201	5.63049	4.3866	6.64246	6.50879	4.26575
171.3	2.75269	2.63062	5.28564	4.08325	7.34558	5.6427	4.39087	6.66687	6.51001	4.25171
171.4	2.75879	2.64893	5.25513	4.08936	7.32727	5.64575	4.38354	6.63879	6.50452	4.27063
171.5	2.73743	2.64282	5.27039	4.09851	7.35168	5.6366	4.3988	6.65283	6.50024	4.26147
171.6	2.78015	2.64893	5.25818	4.0802	7.33032	5.63354	4.38538	6.65527	6.50818	4.26636
171.7	2.74353	2.61841	5.26428	4.10156	7.33032	5.63965	4.38599	6.64856	6.5033	4.25598
171.8	2.76184	2.6123	5.27344	4.09241	7.32727	5.65491	4.38904	6.65466	6.50818	4.26147
171.9	2.74963	2.62451	5.25818	4.08936	7.33948	5.63965	4.39331	6.64917	6.51123	4.26208
172	2.74048	2.63977	5.25818	4.11072	7.35474	5.63354	4.40247	6.6449	6.51733	4.26697
172.1	2.75879	2.6062	5.27039	4.09851	7.32117	5.6427	4.38293	6.64368	6.5033	4.25964
172.2	2.77405	2.62756	5.27649	4.11072	7.32727	5.64575	4.39758	6.65161	6.52222	4.26575
172.3	2.78625	2.61841	5.26123	4.11072	7.34558	5.6488	4.3988	6.65039	6.51306	4.26147
172.4	2.73743	2.63672	5.25818	4.11072	7.33032	5.65491	4.39087	6.64185	6.50696	4.25659
172.5	2.78931	2.65198	5.26123	4.09546	7.33948	5.65796	4.38965	6.64307	6.50757	4.26025
172.6	2.75574	2.63062	5.25513	4.09546	7.34253	5.63354	4.39331	6.64551	6.51062	4.26147
172.7	2.7832	2.63977	5.27039	4.10767	7.32727	5.6366	4.40002	6.64368	6.51978	4.26392
172.8	2.75879	2.65198	5.26123	4.09546	7.33032	5.6488	4.39026	6.64551	6.50879	4.26392
172.9	2.7832	2.64282	5.26428	4.10461	7.33948	5.65186	4.39697	6.65588	6.51184	4.25842
173	2.76489	2.65503	5.25818	4.10156	7.33948	5.66101	4.38965	6.64856	6.52344	4.2688
173.1	2.76794	2.62451	5.26733	4.10461	7.33643	5.6488	4.39575	6.64856	6.50574	4.26514
173.2	2.75574	2.64587	5.27039	4.11682	7.33643	5.65491	4.39514	6.64734	6.50391	4.27185
173.3	2.78625	2.60925	5.24902	4.10156	7.33948	5.62134	4.39636	6.66687	6.5094	4.2627
173.4	2.74963	2.63977	5.26123	4.11072	7.32422	5.66711	4.38721	6.64001	6.5033	4.25659
173.5	2.75879	2.64587	5.25513	4.11682	7.32422	5.67017	4.4043	6.63879	6.49597	4.27429
173.6	2.77405	2.6123	5.27344	4.10461	7.34863	5.6366	4.39819	6.651	6.51184	4.26392
173.7	2.74353	2.65503	5.27039	4.11682	7.34558	5.63354	4.39392	6.64917	6.51001	4.25171
173.8	2.75879	2.64893	5.26123	4.11072	7.33948	5.6366	4.40125	6.64734	6.51245	4.26208
173.9	2.76489	2.63977	5.26733	4.11682	7.33337	5.65796	4.38721	6.65161	6.50146	4.27368
174	2.74353	2.62756	5.27039	4.11682	7.35779	5.6488	4.39453	6.64917	6.50513	4.27185
174.1	2.74353	2.62451	5.25513	4.11987	7.33032	5.66101	4.40247	6.64185	6.51794	4.27063
174.2	2.76489	2.63672	5.24902	4.11072	7.33337	5.6488	4.40674	6.64429	6.49597	4.26208
174.3	2.75879	2.62146	5.25818	4.11072	7.33643	5.66101	4.39087	6.65466	6.50574	4.27307
174.4	2.771	2.61841	5.26428	4.11987	7.33643	5.66101	4.40308	6.65894	6.50879	4.27795
174.5	2.74353	2.61841	5.23682	4.10461	7.32727	5.6488	4.41284	6.6394	6.50818	4.27124
174.6	2.75269	2.63062	5.25513	4.12903	7.34253	5.65796	4.41101	6.64856	6.50452	4.2749
174.7	2.73743	2.62146	5.23682	4.11072	7.33643	5.65796	4.40857	6.6449	6.51123	4.2749
174.8	2.75879	2.64893	5.25513	4.12292	7.35168	5.65796	4.40308	6.64124	6.50146	4.26819
174.9	2.74963	2.63367	5.23682	4.12903	7.33643	5.65491	4.41406	6.63452	6.51001	4.27979
175	2.74048	2.63977	5.24597	4.13513	7.32727	5.65186	4.40125	6.65039	6.50024	4.27185
175.1	2.74963	2.63977	5.23376	4.12903	7.34558	5.65491	4.41284	6.63879	6.51306	4.27185
175.2	2.75879	2.64893	5.25208	4.11987	7.35168	5.67322	4.4104	6.63635	6.52161	4.27673
175.3	2.77405	2.62451	5.24292	4.12903	7.33337	5.65491	4.40735	6.6449	6.50024	4.27917
175.4	2.7771	2.64893	5.27039	4.12292	7.33643	5.64575	4.41895	6.63757	6.5033	4.27429
175.5	2.73743	2.63367	5.25513	4.12292	7.33337	5.65491	4.41406	6.63574	6.50513	4.25964
175.6	2.76489	2.63367	5.25208	4.12598	7.33948	5.63965	4.422	6.63269	6.51367	4.28406
175.7	2.75879	2.60925	5.24902	4.12598	7.33337	5.66711	4.4104	6.63391	6.51367	4.2688
175.8	2.73743	2.65808	5.25818	4.15039	7.32727	5.66101	4.42749	6.64368	6.51245	4.27856
175.9	2.7771	2.64893	5.24292	4.12292	7.32727	5.67017	4.4104	6.64307	6.49109	4.2865
176	2.75879	2.59399	5.26428	4.13208	7.34253	5.67932	4.43115	6.64246	6.52283	4.26819
176.1	2.74658	2.65808	5.24292	4.13818	7.32727	5.66711	4.42688	6.63086	6.50574	4.28284
176.2	2.76489	2.6123	5.25208	4.13818	7.34558	5.65491	4.42078	6.63574	6.51245	4.27979
176.3	2.75574	2.60925	5.24292	4.13818	7.32727	5.67932	4.41711	6.64795	6.51733	4.27673
176.4	2.74048	2.64282	5.24902	4.12903	7.33948	5.67932	4.4165	6.64185	6.50696	4.28528
176.5	2.75879	2.63062	5.24902	4.15039	7.33337	5.65491	4.42139	6.64429	6.50818	4.28467
176.6	2.74658	2.65198	5.26733	4.12903	7.33948	5.67017	4.42261	6.63574	6.51001	4.29443
176.7	2.75574	2.66113	5.25208	4.13818	7.33948	5.67322	4.42322	6.62537	6.51001	4.27795
176.8	2.74048	2.62451	5.24597	4.14124	7.35474	5.68237	4.422	6.64063	6.50879	4.28345
176.9	2.73438	2.61536	5.24902	4.14124	7.33948	5.67627	4.43848	6.63147	6.51184	4.2865
177	2.7832	2.61841	5.23682	4.13818	7.32422	5.65491	4.41589	6.62964	6.50635	4.28101
177.1	2.75574	2.63672	5.24902	4.14124	7.32117	5.66711	4.42932	6.62415	6.51611	4.28589
177.2	2.76184	2.63672	5.23682	4.14429	7.35168	5.66406	4.43726	6.6272	6.51917	4.29016
177.3	2.75269	2.64587	5.25513	4.12292	7.32727	5.68237	4.4281	6.64063	6.50208	4.28284
177.4	2.74658	2.65503	5.24292	4.13818	7.33643	5.67017	4.4342	6.62842	6.51428	4.28711
177.5	2.74048	2.62451	5.25513	4.14429	7.32422	5.69458	4.4342	6.63574	6.52649	4.28101
177.6	2.74048	2.62146	5.24902	4.15649	7.34863	5.67932	4.43481	6.6333	6.51733	4.29688
177.7	2.75269	2.63062	5.25513	4.14429	7.33948	5.67322	4.43115	6.62842	6.52039	4.2926
177.8	2.771	2.64282	5.24597	4.15039	7.32117	5.70679	4.43359	6.62598	6.5155	4.2865
177.9	2.75574	2.61536	5.24292	4.13513	7.33032	5.66101	4.42993	6.62109	6.50452	4.29382
178	2.78625	2.61536	5.26428	4.15039	7.34863	5.67932	4.44885	6.63757	6.51001	4.2926
178.1	2.77405	2.62451	5.26733	4.15649	7.35168	5.68848	4.44031	6.63269	6.51184	4.30115
178.2	2.74353	2.64282	5.26428	4.14124	7.34253	5.67932	4.44153	6.63086	6.52832	4.29321
178.3	2.75574	2.62756	5.24597	4.14734	7.33337	5.69153	4.43848	6.62659	6.5094	4.29321
178.4	2.76489	2.6062	5.27344	4.15039	7.33337	5.67627	4.43848	6.62903	6.51672	4.29993
178.5	2.77405	2.65503	5.26123	4.15039	7.34558	5.68237	4.43481	6.63574	6.51001	4.29871
178.6	2.75879	2.62756	5.23071	4.1626	7.33337	5.67627	4.45251	6.62781	6.5271	4.28894
178.7	2.72827	2.63672	5.25208	4.15344	7.36084	5.68542	4.44824	6.62537	6.51855	4.30481
178.8	2.77405	2.66113	5.25208	4.16565	7.34558	5.67627	4.43909	6.63025	6.52527	4.30298
178.9	2.74048	2.62451	5.25818	4.15649	7.33643	5.69763	4.44702	6.63452	6.51794	4.28833
179	2.76794	2.62756	5.26123	4.14429	7.35168	5.68848	4.43848	6.63269	6.52161	4.31213
179.1	2.75269	2.63062	5.26733	4.15955	7.35474	5.67932	4.45068	6.6095	6.51794	4.3103
179.2	2.78625	2.61536	5.26428	4.17175	7.34253	5.68848	4.45129	6.63818	6.53442	4.31091
179.3	2.74658	2.64587	5.27649	4.16565	7.33643	5.68237	4.45313	6.62842	6.52527	4.31396
179.4	2.771	2.65198	5.26733	4.1687	7.34253	5.68848	4.44397	6.62415	6.51062	4.31091
179.5	2.76794	2.6825	5.27649	4.15649	7.34253	5.69458	4.43909	6.62842	6.52039	4.30847
179.6	2.74658	2.63062	5.26733	4.1626	7.34253	5.69763	4.45251	6.63269	6.51306	4.31458
179.7	2.75269	2.63672	5.25818	4.15039	7.34863	5.68848	4.45435	6.61621	6.51672	4.30969
179.8	2.76489	2.64587	5.27039	4.15955	7.34253	5.68542	4.46228	6.61743	6.51794	4.30847
179.9	2.74658	2.63977	5.25513	4.1626	7.34558	5.69153	4.45618	6.62659	6.51917	4.32007
180	2.72827	2.62146	5.27649	4.15649	7.34863	5.68542	4.45374	6.62048	6.5271	4.31641
180.1	2.76184	2.64587	5.27039	4.1626	7.33337	5.69153	4.46228	6.61987	6.51489	4.31152
180.2	2.75574	2.63367	5.27344	4.15344	7.32117	5.69458	4.45557	6.62354	6.52649	4.31946
180.3	2.72827	2.61536	5.28564	4.1626	7.33643	5.69763	4.45984	6.6156	6.52588	4.31824
180.4	2.74353	2.62451	5.27344	4.15649	7.34558	5.68237	4.45496	6.61926	6.53442	4.31213
180.5	2.79236	2.62756	5.28259	4.17786	7.35779	5.70068	4.45251	6.61926	6.53748	4.32434
180.6	2.70996	2.65808	5.27039	4.16565	7.35474	5.69153	4.45984	6.61987	6.5155	4.32129
180.7	2.7771	2.62756	5.27344	4.14734	7.34863	5.70068	4.46777	6.62292	6.54175	4.31458
180.8	2.76489	2.62451	5.26733	4.1626	7.33643	5.68848	4.4635	6.61987	6.51733	4.30847
180.9	2.771	2.64282	5.30396	4.15649	7.34558	5.70068	4.45496	6.61682	6.53503	4.32861
181	2.73132	2.64282	5.28564	4.15344	7.35779	5.67627	4.46228	6.62415	6.51672	4.32068
181.1	2.78015	2.65503	5.27344	4.18091	7.35474	5.70068	4.45984	6.62598	6.53381	4.32007
181.2	2.75574	2.61841	5.27039	4.17786	7.33337	5.71289	4.46167	6.6095	6.521	4.3219
181.3	2.76184	2.66724	5.2887	4.1626	7.32727	5.69153	4.46777	6.61499	6.53442	4.32251
181.4	2.76489	2.6001	5.29175	4.17786	7.35168	5.70068	4.45984	6.61865	6.52954	4.32434
181.5	2.73743	2.63367	5.27954	4.17786	7.35168	5.69153	4.4751	6.62415	6.52649	4.33411
181.6	2.77405	2.61536	5.29785	4.16565	7.33948	5.70374	4.46838	6.62231	6.52283	4.3219
181.7	2.71912	2.64282	5.28259	4.1687	7.34253	5.70068	4.46838	6.62292	6.52832	4.32556
181.8	2.7832	2.61536	5.2887	4.19922	7.34863	5.70068	4.46533	6.60767	6.54114	4.33105
181.9	2.73438	2.63367	5.2948	4.1748	7.34863	5.68848	4.47815	6.61865	6.54053	4.33105
182	2.74963	2.62451	5.27649	4.1687	7.35168	5.70984	4.46777	6.62415	6.5448	4.33899
182.1	2.74048	2.63977	5.2948	4.18396	7.33948	5.71289	4.46716	6.61438	6.52954	4.33472
182.2	2.76794	2.62756	5.28564	4.19617	7.34253	5.69153	4.47083	6.62476	6.52893	4.33716
182.3	2.79236	2.64282	5.3009	4.17786	7.32117	5.70068	4.45923	6.61682	6.52466	4.33533
182.4	2.75269	2.60925	5.30396	4.19922	7.34253	5.70984	4.47327	6.62476	6.53687	4.32617
182.5	2.75879	2.65808	5.30396	4.17786	7.34253	5.69458	4.47083	6.6272	6.54053	4.33716
182.6	2.78015	2.64282	5.32227	4.19006	7.34863	5.70679	4.48242	6.61804	6.53137	4.328
182.7	2.75269	2.61536	5.31921	4.18701	7.35168	5.70984	4.47021	6.61682	6.53503	4.33411
182.8	2.7771	2.63367	5.30701	4.18091	7.35168	5.70679	4.46594	6.61316	6.52649	4.3219
182.9	2.75269	2.66418	5.31311	4.17786	7.33337	5.70068	4.48059	6.62292	6.52954	4.33228
183	2.76489	2.62756	5.32227	4.20227	7.35168	5.69763	4.47632	6.61865	6.53625	4.34021
183.1	2.75879	2.62451	5.31006	4.18396	7.34863	5.69458	4.47937	6.6333	6.53381	4.34204
183.2	2.7832	2.61536	5.32837	4.19006	7.35168	5.70984	4.47327	6.61926	6.53809	4.34082
183.3	2.75879	2.65198	5.30396	4.19617	7.34558	5.71899	4.47144	6.61865	6.53076	4.34082
183.4	2.78931	2.63062	5.31616	4.17786	7.35779	5.69763	4.46716	6.63391	6.53442	4.34143
183.5	2.72827	2.63977	5.32227	4.1748	7.35168	5.71289	4.46411	6.63208	6.53564	4.3457
183.6	2.75574	2.62146	5.31921	4.19922	7.34558	5.71289	4.47266	6.62231	6.52466	4.34631
183.7	2.7771	2.64587	5.31311	4.20532	7.33948	5.71594	4.48608	6.62109	6.53809	4.33533
183.8	2.75269	2.63977	5.32532	4.18396	7.34863	5.71899	4.48059	6.62476	6.53931	4.34204
183.9	2.74963	2.6123	5.31311	4.18091	7.33948	5.70984	4.48303	6.61682	6.53198	4.33899
184	2.76794	2.64282	5.30701	4.20227	7.34558	5.70679	4.48486	6.62354	6.53259	4.34509
184.1	2.75574	2.6123	5.33752	4.19006	7.34253	5.71289	4.47876	6.62659	6.5271	4.34998
184.2	2.74048	2.65808	5.32227	4.19922	7.34558	5.69458	4.47266	6.63025	6.5271	4.34814
184.3	2.79541	2.61841	5.33142	4.20532	7.32727	5.71899	4.47998	6.61804	6.53076	4.34631
184.4	2.74048	2.62756	5.34363	4.20532	7.34863	5.72205	4.47693	6.61316	6.53687	4.33899
184.5	2.74048	2.61841	5.33142	4.19006	7.36389	5.70068	4.47205	6.6217	6.54053	4.33228
184.6	2.73743	2.67334	5.32532	4.20837	7.35474	5.71899	4.48486	6.62292	6.53381	4.34692
184.7	2.73438	2.62451	5.31921	4.19006	7.35474	5.71594	4.47205	6.62598	6.51672	4.34631
184.8	2.75879	2.63672	5.34973	4.21448	7.36084	5.70984	4.47021	6.62354	6.53381	4.33838
184.9	2.75574	2.62146	5.33447	4.18701	7.34558	5.71899	4.48608	6.63086	6.5332	4.34326
185	2.76184	2.60925	5.34363	4.21753	7.33643	5.72815	4.48425	6.61011	6.5332	4.34875
185.1	2.76184	2.65198	5.35278	4.19922	7.34253	5.72205	4.48914	6.62476	6.52832	4.3512
185.2	2.74963	2.63977	5.32227	4.18701	7.36084	5.7251	4.48303	6.6217	6.52588	4.34448
185.3	2.75879	2.61841	5.34973	4.19922	7.33948	5.70679	4.48792	6.62354	6.52222	4.35303
185.4	2.73743	2.62451	5.34363	4.20837	7.34863	5.71899	4.48792	6.61926	6.54053	4.34814
185.5	2.75879	2.6123	5.34363	4.21753	7.3761	5.7251	4.47571	6.63818	6.52954	4.34753
185.6	2.7832	2.63367	5.34058	4.20532	7.36084	5.71594	4.47937	6.62842	6.52344	4.34326
185.7	2.77405	2.62146	5.34363	4.20227	7.34863	5.71594	4.48608	6.62964	6.53442	4.34998
185.8	2.74963	2.64893	5.34668	4.20227	7.34253	5.70068	4.48303	6.61987	6.52832	4.34509
185.9	2.74658	2.6062	5.35278	4.20227	7.33948	5.70984	4.49829	6.62537	6.52649	4.35364
186	2.73438	2.64282	5.34668	4.21753	7.35474	5.73425	4.49646	6.63086	6.5271	4.34265
186.1	2.78625	2.63977	5.34973	4.20227	7.32117	5.71899	4.48486	6.63269	6.53381	4.3512
186.2	2.75879	2.61841	5.34668	4.20227	7.36389	5.69763	4.48059	6.62598	6.52405	4.34753
186.3	2.74963	2.66724	5.35278	4.22363	7.35168	5.71594	4.47327	6.6394	6.5271	4.34875
186.4	2.76794	2.6062	5.34973	4.22058	7.33948	5.7312	4.47937	6.63025	6.52344	4.34082
186.5	2.771	2.63977	5.33142	4.20227	7.32727	5.72815	4.48547	6.62537	6.53442	4.34265
186.6	2.7771	2.63977	5.34973	4.22363	7.32422	5.72815	4.47632	6.63635	6.52771	4.35547
186.7	2.74658	2.63367	5.34973	4.21143	7.34558	5.7251	4.4928	6.62354	6.52283	4.34326
186.8	2.75574	2.62451	5.33142	4.22668	7.33948	5.71594	4.48853	6.6217	6.54846	4.35059
186.9	2.74658	2.63062	5.34973	4.22058	7.32422	5.7251	4.48486	6.62415	6.52466	4.36096
187	2.7832	2.62146	5.35278	4.20837	7.34558	5.74036	4.48914	6.63147	6.51306	4.35364
187.1	2.75879	2.61536	5.33447	4.21448	7.34558	5.72815	4.47937	6.63147	6.52466	4.34692
187.2	2.75879	2.64282	5.34668	4.22058	7.34863	5.71594	4.49585	6.62292	6.5271	4.34814
187.3	2.77405	2.62756	5.34668	4.21448	7.35168	5.71594	4.49341	6.6272	6.52283	4.35974
187.4	2.71606	2.62146	5.36194	4.22668	7.33948	5.72815	4.48669	6.63879	6.51367	4.36096
187.5	2.771	2.62146	5.34058	4.21753	7.34863	5.73425	4.48547	6.62476	6.51978	4.35913
187.6	2.73743	2.62756	5.35278	4.22668	7.34863	5.74341	4.48975	6.62659	6.52283	4.34448
187.7	2.75269	2.63062	5.34973	4.23584	7.35474	5.7312	4.48853	6.63086	6.50208	4.35608
187.8	2.74963	2.64282	5.34973	4.21753	7.34863	5.72205	4.48608	6.63208	6.52283	4.35181
187.9	2.76489	2.61841	5.34668	4.22058	7.34558	5.71289	4.48914	6.62476	6.521	4.35608
188	2.75269	2.65808	5.35889	4.23279	7.34863	5.74341	4.49219	6.62415	6.52466	4.35791
188.1	2.74963	2.63062	5.33752	4.22058	7.33643	5.74341	4.47815	6.63757	6.53687	4.35608
188.2	2.72522	2.62451	5.35278	4.22668	7.36084	5.7312	4.48914	6.63147	6.50757	4.35059
188.3	2.76184	2.62146	5.34058	4.22058	7.34558	5.72205	4.48975	6.63513	6.51184	4.3573
188.4	2.771	2.63367	5.34668	4.22363	7.34253	5.74036	4.49463	6.6272	6.52161	4.35547
188.5	2.74963	2.64893	5.34668	4.22363	7.35168	5.72815	4.48914	6.6217	6.51672	4.36096
188.6	2.74353	2.61841	5.33752	4.23584	7.34558	5.7373	4.4928	6.63757	6.5271	4.35669
188.7	2.771	2.64893	5.35583	4.22363	7.34558	5.72815	4.47998	6.6217	6.52649	4.34326
188.8	2.74963	2.62451	5.34363	4.24194	7.37305	5.7312	4.49463	6.62781	6.51672	4.35913
188.9	2.76184	2.60925	5.34973	4.24194	7.36694	5.74951	4.48242	6.64124	6.52161	4.35364
189	2.7832	2.65198	5.34363	4.245	7.34253	5.74036	4.49646	6.64795	6.51611	4.35608
189.1	2.74658	2.62451	5.33752	4.23889	7.33643	5.73425	4.4928	6.63208	6.52161	4.36279
189.2	2.7832	2.63062	5.35278	4.23279	7.33948	5.74646	4.48242	6.63879	6.50635	4.3573
189.3	2.78015	2.62756	5.33142	4.22974	7.33032	5.7373	4.49463	6.62903	6.51733	4.36035
189.4	2.75574	2.63367	5.34363	4.24194	7.35168	5.7373	4.48364	6.62476	6.50513	4.3573
189.5	2.76184	2.65503	5.34363	4.22974	7.35474	5.75256	4.50012	6.63879	6.50574	4.35059
189.6	2.78015	2.61841	5.34668	4.22974	7.33948	5.74341	4.50134	6.63025	6.51672	4.35669
189.7	2.73743	2.61841	5.33447	4.26025	7.35779	5.7251	4.49036	6.63635	6.51611	4.35669
189.8	2.78625	2.63367	5.34973	4.23889	7.33337	5.73425	4.49646	6.63269	6.50757	4.35486
189.9	2.78931	2.63367	5.35278	4.23889	7.33337	5.74646	4.48853	6.63147	6.51428	4.36096
190	2.73132	2.65198	5.34058	4.22974	7.35474	5.74646	4.49402	6.63391	6.51184	4.35242
190.1	2.74658	2.62451	5.32532	4.24194	7.34863	5.74341	4.49219	6.63818	6.51672	4.36218
190.2	2.75574	2.64893	5.35583	4.2511	7.33948	5.74341	4.4989	6.61926	6.5033	4.36096
190.3	2.771	2.60315	5.34668	4.22974	7.34558	5.7251	4.49707	6.6394	6.51306	4.35669
190.4	2.75269	2.61841	5.34058	4.25415	7.36084	5.74646	4.50378	6.63696	6.50757	4.3634
190.5	2.74658	2.6062	5.33752	4.23889	7.33643	5.7373	4.50623	6.61865	6.50696	4.3512
190.6	2.74048	2.64893	5.34363	4.245	7.36694	5.74951	4.50073	6.62598	6.51001	4.35669
190.7	2.73743	2.63062	5.34973	4.25415	7.34558	5.75256	4.49036	6.63025	6.51001	4.34875
190.8	2.74353	2.62451	5.33752	4.24194	7.33337	5.74951	4.49341	6.62354	6.51245	4.35364
190.9	2.75269	2.6123	5.32532	4.2511	7.33643	5.74646	4.50195	6.64124	6.51917	4.36462
191	2.74048	2.63977	5.31921	4.2572	7.33948	5.75562	4.49524	6.6394	6.51428	4.36096
191.1	2.74963	2.65808	5.32532	4.23889	7.35474	5.74646	4.49463	6.63269	6.51428	4.36279
191.2	2.76184	2.6062	5.32532	4.2511	7.36084	5.7373	4.50195	6.64124	6.5155	4.36646
191.3	2.74963	2.64893	5.33752	4.25415	7.36389	5.74951	4.50073	6.6272	6.4978	4.3573
191.4	2.73438	2.65808	5.33142	4.24194	7.36084	5.74341	4.50562	6.63269	6.5094	4.35913
191.5	2.74963	2.63367	5.3009	4.2572	7.35474	5.74341	4.50684	6.61804	6.49902	4.36462
191.6	2.75269	2.62451	5.33447	4.23889	7.33643	5.74951	4.50134	6.62537	6.5094	4.36401
191.7	2.771	2.63672	5.32227	4.2572	7.35168	5.74036	4.50256	6.61987	6.50818	4.36462
191.8	2.74658	2.67334	5.32227	4.24805	7.34863	5.73425	4.50623	6.62415	6.50391	4.36096
191.9	2.76794	2.64282	5.33142	4.24805	7.34253	5.74951	4.51538	6.62415	6.49902	4.37256
192	2.74048	2.62451	5.34363	4.245	7.35779	5.75256	4.50867	6.62537	6.51855	4.37134
192.1	2.76794	2.62756	5.33752	4.2572	7.37	5.75867	4.5105	6.63574	6.51062	4.35852
192.2	2.72522	2.64282	5.31006	4.26636	7.33643	5.75562	4.49707	6.62231	6.51001	4.37378
192.3	2.76794	2.63977	5.32227	4.24805	7.34863	5.75867	4.50806	6.61926	6.5094	4.36584
192.4	2.74963	2.63672	5.33142	4.2511	7.34863	5.74036	4.51111	6.6217	6.51672	4.37378
192.5	2.76489	2.64282	5.32227	4.26331	7.34558	5.76782	4.51904	6.62598	6.51062	4.37256
192.6	2.74048	2.59094	5.32532	4.26941	7.35474	5.75867	4.51782	6.61682	6.52283	4.36462
192.7	2.73743	2.62146	5.32837	4.26025	7.35474	5.75562	4.50439	6.63208	6.50696	4.36462
192.8	2.7832	2.63367	5.32837	4.2572	7.36694	5.75562	4.50684	6.62659	6.51367	4.36462
192.9	2.72217	2.63977	5.33752	4.27246	7.36084	5.74951	4.50378	6.63635	6.49963	4.36218
193	2.77405	2.62451	5.31006	4.26636	7.34863	5.74646	4.52026	6.61743	6.51855	4.38171
193.1	2.73438	2.62756	5.33447	4.27856	7.36084	5.75256	4.50928	6.62048	6.51428	4.37622
193.2	2.74658	2.64282	5.33142	4.26025	7.35168	5.76172	4.50928	6.62292	6.51123	4.37683
193.3	2.73438	2.63977	5.31921	4.2572	7.35168	5.76172	4.51782	6.62476	6.51367	4.38354
193.4	2.79541	2.65503	5.31311	4.27246	7.36389	5.74951	4.50928	6.61438	6.52405	4.37195
193.5	2.74353	2.63062	5.31006	4.2511	7.34253	5.74036	4.52332	6.62231	6.51489	4.36462
193.6	2.76184	2.63062	5.32227	4.27246	7.35474	5.74646	4.52271	6.62109	6.51428	4.37561
193.7	2.75269	2.6123	5.33752	4.26331	7.34253	5.74951	4.52454	6.61377	6.50085	4.37561
193.8	2.74353	2.6062	5.32227	4.26331	7.36084	5.74951	4.51782	6.61377	6.50574	4.38232
193.9	2.75574	2.67029	5.31921	4.27551	7.34253	5.78003	4.51965	6.6095	6.49658	4.37561
194	2.73438	2.66113	5.31921	4.26941	7.36084	5.77698	4.51843	6.62415	6.50818	4.37134
194.1	2.75269	2.62451	5.31006	4.27246	7.36389	5.74951	4.52332	6.6095	6.51367	4.37439
194.2	2.771	2.62451	5.33447	4.27856	7.34253	5.74951	4.52637	6.61438	6.50879	4.38293
194.3	2.76184	2.63672	5.32227	4.26331	7.35168	5.77393	4.51538	6.61255	6.51306	4.3927
194.4	2.73132	2.62146	5.32837	4.28467	7.36694	5.76782	4.5343	6.61804	6.49902	4.37805
194.5	2.76794	2.62146	5.33447	4.26636	7.33948	5.76172	4.5282	6.61926	6.52039	4.37622
194.6	2.74048	2.62451	5.32227	4.28772	7.35168	5.77393	4.52637	6.61621	6.51306	4.37317
194.7	2.74963	2.64893	5.31616	4.27551	7.35474	5.75256	4.52087	6.61865	6.50818	4.38293
194.8	2.78015	2.60315	5.34363	4.27856	7.34863	5.77087	4.52393	6.6095	6.50757	4.39514
194.9	2.73743	2.64587	5.32227	4.26941	7.33643	5.76782	4.52393	6.61438	6.51855	4.37622
195	2.76794	2.62756	5.34058	4.27856	7.36694	5.75256	4.53918	6.60889	6.50024	4.38354
195.1	2.73132	2.62146	5.33447	4.27551	7.35779	5.74951	4.53552	6.60706	6.50391	4.38599
195.2	2.72827	2.63672	5.32532	4.27551	7.36389	5.78308	4.5282	6.61926	6.51428	4.38477
195.3	2.73743	2.66418	5.33752	4.28467	7.34863	5.75867	4.54407	6.61011	6.51306	4.38232
195.4	2.74048	2.60315	5.33142	4.28467	7.34253	5.76477	4.53308	6.61194	6.52344	4.38599
195.5	2.74353	2.6001	5.33752	4.29382	7.34863	5.75867	4.54224	6.61072	6.51306	4.38232
195.6	2.74353	2.63672	5.33752	4.29382	7.37305	5.76782	4.5343	6.6095	6.51855	4.39575
195.7	2.79541	2.60315	5.32837	4.27246	7.36389	5.76172	4.53491	6.61865	6.53625	4.38293
195.8	2.76794	2.67029	5.34973	4.28467	7.34558	5.78003	4.52637	6.61438	6.51794	4.39514
195.9	2.75269	2.63367	5.32227	4.28772	7.34863	5.77393	4.54407	6.60583	6.51245	4.38782
196	2.73438	2.61841	5.32532	4.29382	7.35779	5.78003	4.53979	6.61438	6.521	4.38599
196.1	2.75574	2.63672	5.33752	4.28772	7.36084	5.75867	4.54529	6.61011	6.51489	4.40186
196.2	2.73132	2.63977	5.34973	4.27856	7.33948	5.78308	4.53796	6.60828	6.51489	4.40002
196.3	2.76489	2.61841	5.34058	4.29382	7.34253	5.75562	4.53918	6.61438	6.51428	4.40125
196.4	2.73438	2.63672	5.33752	4.29077	7.33643	5.78308	4.54102	6.6156	6.5271	4.40247
196.5	2.74963	2.63672	5.33752	4.30298	7.35168	5.77393	4.54163	6.60461	6.52039	4.39514
196.6	2.73438	2.63062	5.34668	4.27551	7.36694	5.78613	4.54163	6.58997	6.5271	4.40002
196.7	2.73743	2.64282	5.34668	4.27856	7.35168	5.76172	4.5459	6.61743	6.5094	4.39575
196.8	2.74963	2.62451	5.34668	4.29077	7.36694	5.78308	4.54407	6.60217	6.51672	4.40125
196.9	2.7771	2.61536	5.34668	4.27551	7.34253	5.76477	4.54285	6.61194	6.51855	4.4043
197	2.75879	2.63367	5.36804	4.30298	7.35168	5.78003	4.54102	6.59607	6.52222	4.40125
197.1	2.76489	2.63977	5.35278	4.27856	7.36389	5.78613	4.53979	6.60828	6.52405	4.41589
197.2	2.76184	2.65198	5.35583	4.28467	7.33948	5.78003	4.55566	6.6095	6.52588	4.39697
197.3	2.75574	2.66724	5.34058	4.26941	7.34253	5.76477	4.5575	6.6156	6.52649	4.40247
197.4	2.75574	2.60925	5.36499	4.29077	7.3761	5.77698	4.54407	6.6095	6.52283	4.40735
197.5	2.74658	2.62146	5.36804	4.28467	7.35779	5.79529	4.55688	6.61621	6.52649	4.39697
197.6	2.72522	2.6001	5.34668	4.29077	7.34253	5.78003	4.55017	6.60339	6.52954	4.40796
197.7	2.7771	2.64893	5.34668	4.29993	7.37	5.76782	4.55139	6.61438	6.50208	4.40247
197.8	2.74048	2.61536	5.36499	4.28772	7.35474	5.78308	4.54895	6.60156	6.51978	4.40247
197.9	2.73743	2.64282	5.36194	4.29688	7.33948	5.77087	4.54773	6.60522	6.52954	4.41223
198	2.76489	2.6123	5.37415	4.28467	7.35474	5.76782	4.55994	6.6156	6.51794	4.40552
198.1	2.73132	2.62756	5.35889	4.29993	7.34558	5.76477	4.55933	6.60889	6.52893	4.422
198.2	2.771	2.62451	5.34973	4.29993	7.34863	5.79224	4.5575	6.59485	6.52222	4.40369
198.3	2.75269	2.63062	5.34668	4.29688	7.33337	5.79224	4.55444	6.6095	6.52222	4.41711
198.4	2.74963	2.64282	5.37109	4.29688	7.35168	5.78613	4.54285	6.6217	6.51611	4.41101
198.5	2.76794	2.61841	5.36804	4.30908	7.36389	5.77393	4.56543	6.59912	6.53381	4.41711
198.6	2.71606	2.63367	5.35889	4.29382	7.35474	5.78308	4.55383	6.60767	6.521	4.41528
198.7	2.771	2.63062	5.37109	4.30603	7.33948	5.78308	4.55566	6.60767	6.52954	4.42078
198.8	2.73132	2.65198	5.36804	4.29077	7.36084	5.78308	4.56238	6.61011	6.5387	4.41711
198.9	2.76794	2.64893	5.37415	4.30298	7.35474	5.79529	4.5575	6.61438	6.51611	4.41284
199	2.74658	2.60925	5.3772	4.29688	7.35474	5.79834	4.552	6.6095	6.53015	4.41162
199.1	2.74048	2.63672	5.36499	4.30908	7.37	5.76782	4.56299	6.60217	6.53198	4.41956
199.2	2.771	2.63367	5.36804	4.30603	7.36389	5.78918	4.56299	6.6095	6.52222	4.42322
199.3	2.75574	2.63367	5.39246	4.30603	7.36084	5.79529	4.55994	6.6156	6.53259	4.4165
199.4	2.74658	2.65808	5.39856	4.29382	7.36389	5.78918	4.5575	6.61194	6.52527	4.42688
199.5	2.74658	2.61841	5.37415	4.30908	7.34253	5.79224	4.55811	6.60217	6.52893	4.41467
199.6	2.7771	2.64893	5.3894	4.28772	7.34558	5.80139	4.57092	6.61072	6.53442	4.42017
[truncated: 104 more rows]
