# Supplementary material for: Blocking Kir6.2 channels with SpTx1 potentiates glucose-stimulated insulin secretion from murine pancreatic β cells and lowers blood glucose in diabetic mice
Source: eLife. 2022 Feb 25;11:e77026. doi: 10.7554/eLife.77026 (PMC8880991; doi:10.7554/eLife.77026)
Supplement: Figure 6—source data 1. [file elife-77026-fig6-data1.xlsx]

## Sheet: Figure 6
A					Vm (V)								Vm (mV)
	Condition				islet 1	islet 2	islet 3	islet 4	islet 5	islet 6	Mean	SEM	Mean	SEM
	buffer without glucose				-0.0799711	-0.0879942	-0.08303	-0.0814858	-0.0763811	-0.0780264	-0.0811481	0.00167709	-81.1481	1.67709
	15 or 25 mM Glucose				-0.0493116	-0.0258068	-0.0398083	-0.0386	-0.0358535	-0.0287141	-0.0363491	0.00343869	-36.349	3.43869
	buffer without glucose				n/a		-0.0845415	-0.0832919	-0.0860207	-0.08336	-0.0843035	0.000640244	-84.3035	0.640244
	0.2 µM SpTx1 in buffer without glucose				-0.0750338	-0.0763886	-0.0788433	-0.0756194	-0.0728115	-0.0714445	-0.0750235	0.00107256	-75.0235	1.07256
	Glibenclamide in buffer without glucose				n/a		-0.0413699	-0.0386535	-0.0422542	-0.0271221	-0.0373499	0.00349428	-37.3499	3.49428
B					Vm (V)									Vm (mV)
	Condition				islet 1	islet 2	islet 3	islet 4	islet 5	islet 6	islet 7	Mean	SEM	Mean	SEM
	5 mM Glucose				-0.0842421	-0.0777791	-0.0864017	-0.0701058	-0.0819759	-0.0644115	-0.0817538	-0.0780957	0.00303316	-78.0957	3.03316
	15 mM Glucose				-0.0583785	-0.0445388	-0.0415016	-0.0423122	-0.0446514	-0.0393892	-0.0575737	-0.0469065	0.00293954	-46.9065	2.93954
	5 mM Glucose				-0.0835562	-0.0791046	-0.0865178	-0.0662989	-0.0840316	-0.0614357	-0.0866842	-0.0782327	0.00386484	-78.2327	3.86484
	0.2 µM SpTx1 in 5 mM Glucose				-0.0795147	-0.0714293	-0.0520589	-0.0178774	-0.0733388	-0.0191347	-0.0866842	-0.0571483	0.010748	-57.1483	10.748
	Glibenclamide in 5 mM Glucose				-0.0422803	-0.048111	-0.0173343	-0.0140193	-0.0206655	-0.0171508	-0.0503497	-0.0299873	0.00609637	-29.9873	6.09637
C					Vm (V)									Vm (mV)
	Condition				islet 1	islet 2	islet 3	islet 4	islet 5	islet 6	islet 7	Mean	SEM	Mean	SEM
	8 mM Glucose				-0.0644115	-0.0736547	-0.0573403	-0.0712641	-0.0639845	-0.0690778	-0.0548255	-0.0649369	0.00264716	-64.9369	2.64716
	15 mM Glucose				-0.0393892	-0.0483011	-0.0448759	-0.0520109	-0.0419231	-0.0440172	-0.0389592	-0.0442109	0.00178694	-44.2109	1.78694
	8 mM Glucose				-0.0614357	-0.0774667	-0.0887634	-0.0867645	-0.0806007	-0.0616862	-0.0769542	-0.0762388	0.00413928	-76.2388	4.13928
	0.2 µM SpTx in 8 mM Glucose				-0.0191347	-0.0589778	-0.0334081	-0.0550147	-0.0619203	-0.0216782	-0.0576395	-0.0439676	0.00703995	-43.9676	7.03995
