# Supplementary material for: Blocking Kir6.2 channels with SpTx1 potentiates glucose-stimulated insulin secretion from murine pancreatic β cells and lowers blood glucose in diabetic mice
Source: eLife. 2022 Feb 25;11:e77026. doi: 10.7554/eLife.77026 (PMC8880991; doi:10.7554/eLife.77026)
Supplement: Figure 7—source data 1. [file elife-77026-fig7-data1.xlsx]

## Sheet: Figure 7
A to C	Time (min)	insulin seretion as % total					SEM [stdev/sqrt(n)]						D	Time (min)	insulin seretion as % total (n = 3)				SEM [stdev/sqrt(n)]				G/SpTx1 2uM ratio	G/SpTx1 0.5uM ratio		E	Secreted insulin (ng/mL)									Total insulin (ng/mL)									Amount of insulin (secreted/total)
		added 10 min early		added at glucose elevation			added 10 min early		added at glucose elevation						16.7 mM glucose	+ 0.5uM SpTx1	+ 2uM SpTx1	+ 1uM Glibenclamide	16.7 mM glucose	+ 0.5uM SpTx1	+ 2uM SpTx1	+ 1uM Glibenclamide					[Glucose]	[diazoxide]	[SpTx1]	mouse 1	mouse 2	mouse 3	mouse 4	mouse 5	mouse 6	[Glucose]	[diazoxide]	[SpTx1]	mouse 1	mouse 2	mouse 3	mouse 4	mouse 5	mouse 6	[Glucose]	[diazoxide]	[SpTx1]	mouse 1	mouse 2
		0.5 uM SpTx1 (n=4)	1 uM Glibenclamide (n=4)	no drug (n=6)	0.5 uM toxin (n=6)	1 uM glib (n=4)	0.5 uM SpTx1 (n=4)	1 uM Glibenclamide (n=4)	no drug (n=6)	0.5 uM toxin (n=6)	1 uM glib (n=4)			10	0.00573525	0.00615953	0.00661496	0.0107196	0.00110701	0.000795945	0.00138857	0.00258416	1.62051	3.24666			3 mM	0 µM	0 µM	0.0817259	0.4	0.420649	1.04745	1.75046	2.59692	3 mM	0 µM	0 µM	120.692	257.522	273.746	511.909	992.488	595.181	3 mM	0 µM	0 µM	0.0677147	0.155326
	10	0.00124304	0.00193002	0.00174324	0.00161115	0.00198488	0.000244982	0.000323083	0.000429533	0.00034587	0.000544379			11	0.00557723	0.00669191	0.00528099	0.008943	0.000916096	0.00113994	0.00101771	0.00239866	1.69343	2.1042				100 µM	0 µM	0.249194	0.411799	0.438348	1.04379	2.7325	2.54196		100 µM	0 µM	112.597	331.268	480.236	577.867	572.92	569.256		100 µM	0 µM	0.221315	0.12431
	11	0.000657119	0.00128008	0.00157141	0.001465	0.00227541	0.000218517	0.000393327	0.000439496	0.000302674	0.000673924			12	0.00589647	0.00583496	0.00467795	0.00746533	0.000938036	0.000653014	0.000768458	0.00292135	1.59585	4.47364				100 µM	0.02 µM	0.422803	0.435398	0.429499	2.86314	3.86845	1.75412		100 µM	0.02 µM	179.942	446.313	365.192	1060.46	944.852	688.622		100 µM	0.02 µM	0.234966	0.0975545
	12	0.000724681	0.00120035	0.00139924	0.00149147	0.00237002	0.000211043	0.000405923	0.00026992	0.000262175	0.000706048			13	0.00606775	0.00574147	0.00439066	0.00683306	0.00194812	0.000718083	0.00081181	0.00242091	1.55627	3.37135				100 µM	1.0 µM	0.217895	0.842478	0.748083	1.83529	2.86808	2.03994		100 µM	1.0 µM	145.619	636.578	627.729	680.469	889.886	608.923		100 µM	1.0 µM	0.149634	0.132345
	13	0.00058557	0.000945931	0.00124354	0.00134432	0.00218874	0.000102448	0.000399385	0.000228941	0.000216092	0.000562556			14	0.00651341	0.0051207	0.0043411	0.00668983	0.00247082	0.000486968	0.00081326	0.00167868	1.54104	3.44721			16.7 mM	0 µM	0 µM	0.423279	1.21121	2.59174	2.53335	3.4727	3.90143	16.7 mM	0 µM	0 µM	176.05	344.543	329.794	493.587	723.433	1067.88	16.7 mM	0 µM	0 µM	0.240431	0.351541
	14	0.000626035	0.000939582	0.00113407	0.0012252	0.0020091	0.000144569	0.000292388	0.000235465	0.000159699	0.000662253			15	0.00545017	0.0052254	0.00518835	0.00749203	0.00237262	0.000697869	0.00103544	0.00140203	1.44401	2.00901				100 µM	0 µM	0.178204	0.712684	0.59764	3.68029	1.79077	1.71015		100 µM	0 µM	116.466	415.339	372.566	1009.16	601.594	687.706		100 µM	0 µM	0.15301	0.171591
	15	0.000526451	0.000871199	0.000939073	0.00128858	0.00177491	9.60154e-05	0.000247602	0.000209988	0.000261265	0.000521457			16	0.00435078	0.00451315	0.00410275	0.00616494	0.00237566	0.000531988	0.00087463	0.00135651	1.50264	2.5499				100 µM	0.02 µM	0.413779	1.27906	0.553392	0.838586	2.86075	2.27446		100 µM	0.02 µM	156.521	348.968	486.136	240.748	659.307	1002.84		100 µM	0.02 µM	0.26436	0.366526
	16	0.000444448	0.000797391	0.00104742	0.000929708	0.00167974	4.97837e-05	0.000197875	0.000240285	0.000170905	0.000752337			17	0.00530876	0.00457752	0.0037143	0.00567954	0.00285601	0.000553158	0.00049609	0.00163246	1.5291	2.95116				100 µM	1.0 µM	1.18783	1.62124	2.60944	3.47508	4.32283	5.4771		100 µM	1.0 µM	170.314	405.015	347.493	1038.48	802.217	984.518		100 µM	1.0 µM	0.697435	0.400291
	17	0.000428279	0.000866192	0.000929026	0.00108252	0.00141809	0.000166953	0.000223541	0.000173733	0.000207908	0.000572743			18	0.00653552	0.00435972	0.00362466	0.00561594	0.00381373	0.000689839	0.000471618	0.00129843	1.54937	1.88222
	18	0.000399481	0.000774801	0.000798806	0.000991794	0.00175052	8.58204e-05	0.000176807	0.000128559	0.00013776	0.000634522			19	0.00581401	0.00368539	0.00284488	0.00583055	0.00343069	0.000543143	0.000929593	0.000866634	2.04949	1.59559																						Student's t-test, two-tailed and heteroscedastic
	19	0.000399481	0.000710233	0.000740375	0.000881183	0.00162602	8.58204e-05	0.000231572	0.000121076	0.00016355	0.000708837			20	0.00702923	0.00352038	0.00295429	0.00574005	0.00391532	0.000527946	0.00110237	0.00128985	1.94295	2.44315																						P value =	0.034	between the glucose only group and the glucose + 100 μM diazoxide group in the presence of 16.7 mM glucose
	20	0.000811154	0.00136941	0.000795527	0.000994673	0.00153572	0.000261871	0.000143862	0.00011331	0.000150984	0.000549615			21	0.00731547	0.00376539	0.00265701	0.00451801	0.00277578	0.000489168	0.000887766	0.00148973	1.70041	3.04544																						P value =	0.003	between the glucose + 100 μM diazoxide group and the glucose + 100 μM diazoxide + 1 μM SpTx1 group in the presence of 16.7 mM glucose
	21	0.000420586	0.000793298	0.000642545	0.000784587	0.00151435	6.93976e-05	0.000148174	9.32401e-05	9.31683e-05	0.000581151			22	0.00559233	0.00325441	0.00322602	0.00516297	0.00265164	0.000742156	0.00114543	0.00150003	1.60042	2.02117
	22	0.00046451	0.000694506	0.000671862	0.000850021	0.00132407	5.9074e-05	0.000242619	8.69945e-05	0.000171783	0.000482794			23	0.00551607	0.00400189	0.016488	0.0363601	0.00282477	0.000654831	0.00318944	0.0232017	2.20525	35.4315
	23	0.00149686	0.00357128	0.000636627	0.000913771	0.00175144	0.000718761	0.00101582	6.50294e-05	0.000182705	0.000734042			24	0.00587828	0.00501966	0.0306914	0.0735656	0.00300136	0.000714004	0.000929541	0.0333723	2.39695	46.7396
	24	0.000647013	0.0101912	0.000606488	0.00104761	0.00159145	8.28785e-05	0.00238119	7.91204e-05	0.000142234	0.000527179			25	0.00518176	0.00498204	0.0340605	0.084635	0.00282905	0.000851677	0.00239816	0.0269053	2.48484	31.5909
	25	0.000892514	0.0127146	0.000556919	0.000719947	0.00120807	0.000312355	0.00319822	4.75489e-05	8.99872e-05	0.000450185			26	0.00586041	0.00494785	0.0258252	0.0706266	0.00177878	0.00088016	0.00248276	0.018709	2.7348	21.2564
	26	0.000884014	0.0130595	0.000688881	0.000831748	0.00130973	0.000133494	0.00287659	9.57697e-05	8.98253e-05	0.000399636			27	0.00439386	0.00478252	0.0214473	0.0688675	0.00199825	0.00094847	0.00279742	0.018686	3.21101	19.7012
	27	0.000634061	0.0129272	0.000538175	0.000764527	0.00119564	9.12006e-05	0.00290307	4.70746e-05	7.67609e-05	0.000367861			28	0.00418997	0.00409573	0.0173414	0.0592456	0.001228	0.00073101	0.00210025	0.0150746	3.41642	20.6216
	28	0.000545221	0.00929897	0.000575614	0.000823095	0.00145662	6.82715e-05	0.00224329	6.95588e-05	0.000105332	0.000604523			29	0.00363022	0.00393545	0.0180154	0.0537552	0.00115037	0.000674483	0.0023844	0.0143637	2.98385	21.2959
	29	0.00039458	0.00904134	0.000589991	0.000796578	0.00118012	6.2883e-05	0.00226815	0.000116737	9.06233e-05	0.000429825			30	0.00380699	0.00517196	0.0163225	0.0508739	0.00162442	0.00150017	0.00224163	0.0134924	3.1168	8.99388
	30	0.00115896	0.00982983	0.000488501	0.000706423	0.00149054	0.000332307	0.00136336	4.01101e-05	5.09507e-05	0.000582627			31	0.00382057	0.00398792	0.0155816	0.0520769	0.00122294	0.000711393	0.00185971	0.0135333	3.34219	19.0237
	31	0.000413688	0.00816551	0.000597523	0.00074721	0.00117161	3.67798e-05	0.00147241	5.93291e-05	6.99605e-05	0.000368069			32	0.00356561	0.00429423	0.0199763	0.0539388	0.00159797	0.000869998	0.00494132	0.0150368	2.70015	17.2837
	32	0.000502219	0.00945806	0.000526217	0.00101886	0.00111852	7.30356e-05	0.00280781	3.25744e-05	0.000183341	0.000442452			33	0.0153628	0.0263429	0.0424393	0.0467069	0.00915703	0.00948219	0.0181251	0.0119349	1.10056	1.25866
	33	0.00465501	0.00564208	0.00185125	0.00488845	0.00154586	0.00164122	0.00142285	0.000437715	0.00145786	0.000137373			34	0.0624746	0.087883	0.113714	0.036421	0.0199027	0.0294424	0.0338816	0.00274695	0.320285	0.0932989
	34	0.0109391	0.00848596	0.0103329	0.0133755	0.00705709	0.00157223	0.00341433	0.00222139	0.0022001	0.000853707			35	0.0836635	0.110233	0.154257	0.124196	0.00962185	0.0326457	0.032104	0.0123581	0.805126	0.378551
	35	0.0124208	0.0187406	0.0138432	0.0186933	0.0196409	0.000605912	0.00415571	0.00157931	0.00152381	0.00165328			36	0.0832023	0.105822	0.179944	0.179521	0.0122782	0.0275939	0.0377092	0.0472621	0.997648	1.71277
	36	0.0113213	0.0229283	0.00748653	0.0156028	0.0217421	0.00133444	0.0036237	0.000601751	0.00175056	0.00250348			37	0.0738862	0.129441	0.207536	0.187416	0.0114418	0.0382973	0.0409719	0.0433034	0.903054	1.13072
	37	0.0104062	0.0218769	0.00414855	0.0116999	0.0195108	0.0013726	0.00329134	0.000581266	0.000878308	0.00218676			38	0.0712976	0.143424	0.225173	0.195368	0.0163598	0.0456526	0.0430914	0.0445195	0.867636	0.97518
	38	0.0119193	0.0237617	0.00303495	0.0111684	0.0231553	0.00222419	0.00315239	0.000502113	0.000926949	0.00420854			39	0.0618613	0.139553	0.251286	0.213679	0.0134148	0.040488	0.0608772	0.04931	0.850343	1.21789
	39	0.0112095	0.0227197	0.00238548	0.00996581	0.0242901	0.00187708	0.0032041	0.00046099	0.00116438	0.00260256			40	0.0436308	0.136648	0.221377	0.210428	0.00917467	0.0398303	0.042801	0.0456863	0.950541	1.14702
	40	0.00876627	0.0233131	0.00211434	0.00838661	0.0220934	0.000273053	0.00195855	0.000447446	0.00104237	0.00350204			41	0.04104	0.146164	0.222739	0.212153	0.0116085	0.0488212	0.0441265	0.0448252	0.952473	0.918149
	41	0.00725183	0.0189061	0.00181616	0.00751188	0.0227522	0.000553074	0.0019775	0.000384121	0.00113622	0.00348512			42	0.0400508	0.118449	0.223197	0.225698	0.0126809	0.0354284	0.0426083	0.0487574	1.0112	1.37622
	42	0.00739297	0.0206662	0.00179867	0.00699331	0.024047	0.000821112	0.00226321	0.000365509	0.00100168	0.00506184			43	0.0380191	0.12213	0.225545	0.226866	0.0125945	0.0407204	0.0436018	0.0512327	1.00586	1.25816
	43	0.00784634	0.0204343	0.00192056	0.00702152	0.022259	0.0010761	0.00150833	0.000369457	0.00114269	0.00418944			44	0.0387115	0.121757	0.211825	0.217413	0.0154912	0.0404164	0.0444196	0.0495311	1.02638	1.22552
	44	0.00788444	0.0213483	0.0021025	0.00724732	0.0228907	0.00107797	0.00102513	0.000356743	0.000965077	0.00481905			45	0.0470782	0.128128	0.215104	0.245812	0.0203256	0.0449607	0.050784	0.0550653	1.14276	1.22474
	45	0.00837538	0.022155	0.00190376	0.00719402	0.022775	0.00106132	0.00245688	0.000385056	0.00105995	0.00393152			46	0.0391934	0.116953	0.209884	0.234076	0.0132643	0.0390529	0.0427681	0.0547212	1.11526	1.40121
	46	0.00878032	0.0187891	0.00196893	0.00762853	0.0194393	0.00225925	0.00197915	0.000468952	0.00135474	0.00340081			47	0.0375673	0.131212	0.215622	0.237918	0.0120521	0.0477382	0.0448346	0.0525377	1.10341	1.10054
	47	0.00834188	0.0229215	0.00206098	0.00785375	0.0193132	0.000657263	0.00314926	0.000468797	0.00117848	0.00208713			48	0.0410024	0.121554	0.1982	0.260247	0.0146547	0.0430559	0.0361877	0.0617467	1.31305	1.43411
	48	0.00839793	0.0217766	0.00233888	0.00860892	0.0233015	0.000971824	0.00255744	0.000356342	0.00106749	0.00409658			49	0.0418948	0.12585	0.230153	0.244232	0.0154873	0.0452117	0.0469686	0.0568557	1.06117	1.25754
	49	0.00854576	0.0199675	0.00227981	0.00887475	0.0218145	0.00110952	0.00252776	0.000379353	0.00129967	0.0032712			50	0.0455721	0.129175	0.202977	0.276177	0.0171066	0.0459309	0.0390404	0.0673339	1.36063	1.46598
	50	0.0109744	0.0278853	0.00250712	0.0105261	0.0248346	0.00138839	0.00324082	0.000467993	0.0015911	0.00433716			51	0.0533791	0.151374	0.248694	0.307395	0.0223323	0.056156	0.0619216	0.0797806	1.23604	1.4207
	51	0.010004	0.0246797	0.00240539	0.010105	0.0237359	0.00134263	0.00399881	0.000410689	0.00145389	0.00364185			52	0.043878	0.154594	0.22601	0.307919	0.0150177	0.057939	0.0452125	0.0815022	1.36241	1.40669
	52	0.00864932	0.0229446	0.0023916	0.00970006	0.0226228	0.000899844	0.00257543	0.000522776	0.0015541	0.00447515			53	0.0464192	0.160048	0.267328	0.30061	0.0167335	0.060729	0.0709741	0.0736103	1.1245	1.21211
	53	0.00976595	0.0239723	0.00238	0.00962339	0.0246394	0.00102482	0.00234445	0.000495875	0.00162272	0.00452434			54	0.0466274	0.158259	0.256794	0.301912	0.0167834	0.0564126	0.0585027	0.0743888	1.1757	1.31866
	54	0.0105525	0.0275133	0.00258012	0.0106949	0.0280878	0.000769771	0.00361276	0.000409633	0.00146082	0.00507286			55	0.0515809	0.175834	0.289697	0.319857	0.0186676	0.0627806	0.0730825	0.083743	1.10411	1.3339
	55	0.0103812	0.027193	0.00275977	0.0110298	0.028377	0.000841979	0.003744	0.000430464	0.00154608	0.00518469			56	0.0528724	0.188632	0.277442	0.341142	0.0201169	0.0711516	0.0673226	0.088178	1.2296	1.2393
	56	0.0122511	0.0292662	0.00300353	0.0123405	0.031298	0.000611441	0.00370273	0.000529195	0.00167116	0.00536246			57	0.0572768	0.203796	0.312904	0.380898	0.0223049	0.0788084	0.0777687	0.100374	1.2173	1.27364
	57	0.0111675	0.0303963	0.00294075	0.0116572	0.0320506	0.000530067	0.00405217	0.000494219	0.00129292	0.00627566			58	0.0587914	0.21135	0.323835	0.371504	0.0218294	0.0814495	0.0810597	0.102349	1.1472	1.25659
	58	0.0115182	0.0290032	0.00301059	0.0117441	0.027997	0.00131991	0.00294625	0.000535367	0.00157814	0.00477083			59	0.0685515	0.227259	0.330019	0.379028	0.0309266	0.0890701	0.0787897	0.105362	1.1485	1.18291
	59	0.013351	0.030504	0.00309501	0.0113662	0.0292306	0.00147145	0.00342214	0.000571968	0.00133126	0.00446356			60	0.0581654	0.212254	0.315039	0.386918	0.0214658	0.0784144	0.0830568	0.112332	1.22816	1.43255
	60	0.0169884	0.0362904	0.00288125	0.0127051	0.0325944	0.00353524	0.00244008	0.000426467	0.00150004	0.00314359			61	0.063123	0.220705	0.326776	0.381425	0.0215047	0.0807453	0.0725359	0.10639	1.16724	1.3176
	61	0.0138631	0.0310884	0.0031179	0.0139414	0.0340813	0.00192525	0.00351784	0.000458308	0.00150251	0.00454527			62	0.0734173	0.226163	0.351592	0.366802	0.0328153	0.0842622	0.0884517	0.0918967	1.04326	1.0906
	62	0.014988	0.0359214	0.00335316	0.0150556	0.039079	0.00261405	0.00434845	0.00044189	0.00138186	0.00877735			63	0.0583839	0.16437	0.328336	0.36688	0.0243182	0.0616408	0.0803179	0.0975195	1.11739	1.58206
	63	0.00913203	0.0357371	0.00206269	0.0100408	0.0378492	0.00128828	0.00367596	0.000282043	0.00113417	0.00729031			64	0.0315481	0.0614647	0.188598	0.339925	0.0092793	0.0187035	0.0666635	0.0924871	1.80237	4.9449
	64	0.00532819	0.0330699	0.00144417	0.00563495	0.0354868	0.00103772	0.0049547	0.000232959	0.00101989	0.00645276			65	0.0223211	0.0462789	0.141274	0.357178	0.00680394	0.0171065	0.0442952	0.0934683	2.52827	5.46392
	65	0.00429803	0.0293692	0.00107332	0.0033427	0.0375694	0.000699647	0.00451406	0.000173938	0.000588508	0.00678969			66	0.0186147	0.0354569	0.106264	0.344574	0.00641448	0.0132513	0.0344615	0.0898481	3.24263	6.78031
	66	0.00331517	0.0284917	0.000864338	0.00261227	0.0376877	0.000692331	0.00341578	0.00013542	0.000449692	0.00624493			67	0.0170753	0.0264636	0.0913536	0.296049	0.00613492	0.00974927	0.0329885	0.0777207	3.2407	7.97195
	67	0.00247962	0.0269124	0.00098807	0.0022608	0.0331342	0.000357074	0.00350896	0.000135624	0.000442899	0.00795902			68	0.0145745	0.0237472	0.0603564	0.269738	0.00638881	0.00869764	0.0171033	0.0734945	4.46909	8.44994
	68	0.00221635	0.0250452	0.000783526	0.0022946	0.0345007	0.000354149	0.00283692	0.00012048	0.000424088	0.00520607			69	0.0105923	0.0199843	0.0560312	0.240557	0.00345305	0.00817634	0.0179534	0.0660794	4.29327	8.08179
	69	0.00193808	0.0229963	0.000687301	0.00181837	0.0315711	0.000361741	0.00328576	7.73919e-05	0.000326139	0.00474693			70	0.00840236	0.0145962	0.0420689	0.242245	0.00264398	0.00594762	0.00988276	0.0711736	5.7583	11.9667
	70	0.00227708	0.0236473	0.000643103	0.001577	0.0271589	0.000481091	0.00226977	7.49677e-05	0.000356048	0.00360552			71	0.00819286	0.0128225	0.0399363	0.20586	0.00288919	0.00423821	0.0118552	0.0550416	5.15469	12.987
	71	0.00152361	0.020076	0.000652511	0.00141639	0.0268004	0.000393659	0.00105826	0.000106278	0.000329715	0.00346742			72	0.00742818	0.01181	0.0358671	0.190818	0.00259502	0.00424767	0.0113057	0.0511961	5.32015	12.0527
	72	0.00140691	0.020887	0.000603064	0.0013336	0.0275743	0.000205712	0.00241827	7.25132e-05	0.000219802	0.00264524			73	0.00747348	0.0115104	0.0323507	0.209859	0.00229912	0.00391412	0.00913873	0.0588959	6.487	15.047
	73	0.00113597	0.0223501	0.000583012	0.00127916	0.0275549	0.000171056	0.00308072	6.326e-05	0.000239295	0.00169496			74	0.00716394	0.0110671	0.0279565	0.196759	0.00215532	0.0044238	0.00797035	0.0533397	7.03806	12.0574
	74	0.00115828	0.0230676	0.00057367	0.00144191	0.0292481	0.000162572	0.00245162	5.33336e-05	0.00040988	0.00191492			75	0.00683834	0.00897383	0.0281363	0.192903	0.00304013	0.00351597	0.00932025	0.05337	6.85603	15.1793
	75	0.00114582	0.022046	0.000510523	0.00110847	0.030634	0.000196569	0.00332779	3.66694e-05	0.000213099	0.00329954			76	0.00601169	0.00756947	0.0241814	0.202065	0.0021175	0.00230195	0.00768677	0.0636221	8.35619	27.6383
	76	0.000958451	0.0191692	0.000671308	0.0010409	0.0280269	0.000184942	0.00259649	0.000165629	0.000221637	0.00441396			77	0.00487213	0.00694974	0.0216776	0.187208	0.00219174	0.00263135	0.00619521	0.0528517	8.63601	20.0854
	77	0.00098821	0.0185431	0.000583012	0.00116179	0.0317132	0.000155743	0.00197127	6.326e-05	0.000153286	0.00456069			78	0.00492159	0.00662005	0.0178988	0.170436	0.00193149	0.00239438	0.0044331	0.0449448	9.52221	18.771
	78	0.000876184	0.0189178	0.000508737	0.000995535	0.0330477	0.00015993	0.0017806	3.6203e-05	0.000111047	0.00473497			79	0.00494616	0.0080716	0.0195222	0.173318	0.00187167	0.00359056	0.00553045	0.0438854	8.87798	12.2225
	79	0.000855516	0.0194722	0.000594349	0.000934553	0.0294085	0.000192272	0.00211602	9.72395e-05	0.000152471	0.00438978			80	0.00471715	0.00614641	0.0178405	0.189221	0.00204142	0.0021724	0.00419568	0.0551068	10.6063	25.3668
	80	0.00118299	0.0227262	0.000512517	0.00107522	0.0321426	0.000215997	0.00204492	2.97198e-05	0.000141258	0.00409263
[truncated: 6 more columns]
