# Supplementary material for: Blocking Kir6.2 channels with SpTx1 potentiates glucose-stimulated insulin secretion from murine pancreatic β cells and lowers blood glucose in diabetic mice
Source: eLife. 2022 Feb 25;11:e77026. doi: 10.7554/eLife.77026 (PMC8880991; doi:10.7554/eLife.77026)
Supplement: Figure 8—figure supplement 2—source data 1. [file elife-77026-fig8-figsupp2-data1.xlsx]

## Sheet: Figure 8-figure supplement 2
	[SpTx1]	hKir6.2bgd		mKir6.2bgd+N107YV108
	Molar	I/I0	SEM	I/I0	SEM
	1e-09	0.936	0.02063	0.923	0.013
	3e-09	0.8698	0.02094	0.823	0.015
	1e-08	0.6272	0.02026	0.573	0.023
	3e-08	0.4278	0.01974	0.3845	0.021
	1e-07	0.2154	0.02093	0.1656	0.016
	3e-07	0.101	0.02634	0.06534	0.011
