# Supplementary material for: Blocking Kir6.2 channels with SpTx1 potentiates glucose-stimulated insulin secretion from murine pancreatic β cells and lowers blood glucose in diabetic mice
Source: eLife. 2022 Feb 25;11:e77026. doi: 10.7554/eLife.77026 (PMC8880991; doi:10.7554/eLife.77026)
Supplement: Figure 8—source data 1. [file elife-77026-fig8-data1.xlsx]

## Sheet: Figure 8
A	Blood glucose	Rosa-Kir6.2-NDM (saline, vehicle)							Rosa-Kir6.2-NDM (SpTx1, 1 mg/kg)							Rosa-Kir6.2-NDMV108E (DMSO, vehicle)							Rosa-Kir6.2-NDMV108E (glibenclamide, 40 mg/kg)
		male	male	male	female	female	Mean (n=5)	SEM (n=5)	male	male	male	female	female	Mean (n=5)	SEM (n=5)	male	male	female	female	female	Mean (n=5)	SEM (n=5)	male	male	female	female	female	Mean (n=5)	SEM (n=5)
	Minutes	Mouse 1	Mouse 2	Mouse 3	Mouse 4	Mouse 5			Mouse 1	Mouse 2	Mouse 3	Mouse 4	Mouse 5			Mouse 1	Mouse 2	Mouse 3	Mouse 4	Mouse 5			Mouse 1	Mouse 2	Mouse 3	Mouse 4	Mouse 5
	0	793	769	889	770	788	801.8	22.3146	746	803	856	665	1017	817.4	59.1021	941	571	687	787	779	753	61.0966	694	908	722	850	570.5	748.9	59.6231
	5	762	807	924	675	746	782.8	41.1891	668	848	823	731	980	810	53.347	850	697	551	793	587	695.6	57.4592	561	713	795	670	562	660.2	45.0216
	10	740	815	814	853	770	798.4	19.6433	804	888	756	777	867	818.4	25.5159	922	741	701	747	650	752.2	45.8535	530.5	637	599	735	787	657.7	46.2319
	15	789	737	973	820	712	806.2	45.8098	800	833	713	675	674	739	32.8283	834	597.5	658	682	679	690.1	39.052	564	566	651	777	819	675.4	52.8759
	25	784	734	897	770	831	803.2	28.1343	723	737	604.667	606.5	650	664.233	28.1358	788	722	577.5	936	747	754.1	57.6651	552	456.5	672	563	711	590.9	45.4732
	40	698	727	764	748	686	724.6	14.6683	613	623.333	704	569.5	746	651.167	32.1602	790	693.5	674	861	733	750.3	34.0425	457.5	435	650	560.5	774	575.4	62.786
	70	655	653	665	701	734	681.6	15.6895	650	697	712	614	805	695.6	32.3861	780	554	595	694	784	681.4	46.9591	463.5	530	822	519.5	763	619.6	72.0919
	120	787	709	731	733	836	759.2	23.1006	618	523	677	555	550	584.6	27.8579	644	621.5	535.5	665	736	640.4	32.4952	701	498.333	622	515.5	618	590.967	37.4682
C	Plasma insulin	Rosa-Kir6.2-NDM (saline, vehicle)							Rosa-Kir6.2-NDM (SpTx1, 1 mg/kg)							Rosa-Kir6.2-NDMV108E (DMSO, vehicle)							Rosa-Kir6.2-NDMV108E (glibenclamide, 40 mg/kg)
		male	male	female	female	female	Mean (n=5)	SEM (n=5)	male	male	female	female	female	Mean (n=5)	SEM (n=5)	male	male	female	female	female	Mean (n=5)	SEM (n=5)	male	male	female	female	female	Mean (n=5)	SEM (n=5)
	Minutes	Mouse 1	Mouse 2	Mouse 3	Mouse 4	Mouse 5			Mouse 1	Mouse 2	Mouse 3	Mouse 4	Mouse 5			Mouse 1	Mouse 2	Mouse 3	Mouse 4	Mouse 5			Mouse 1	Mouse 2	Mouse 3	Mouse 4	Mouse 5
	0	0.209694	0.142957	0.225959	0.230769	0.283456	0.218567	0.0225939	0.228909	0.208992	0.192308	0.197284	0.213822	0.208263	0.00645285	0.224029	0.236865	0.251784	0.318691	0.241171	0.254508	0.0166508	0.361757	0.239889	0.243854	0.236865	0.223945	0.261262	0.0253445
	5	0.272919	0.269406	0.234808	0.322093	0.434492	0.306744	0.0348341	0.240708	0.199157	0.200238	0.237794	0.234282	0.222436	0.00934004	0.212133	0.228252	0.224029	0.305771	0.245478	0.243132	0.0165476	0.322997	0.319191	0.220063	0.223945	0.206718	0.258583	0.0256866
	10	0.255357	0.234282	0.228909	0.304531	0.367756	0.278167	0.0260709	0.220059	0.262381	0.247819	0.192132	0.234282	0.231335	0.0120588	0.224029	0.219638	0.220063	0.228252	0.236865	0.225769	0.00318157	0.301464	0.600714	0.220063	0.228252	0.202412	0.310581	0.0744756
	15	0.220232	0.206182	0.20531	0.329118	0.343168	0.260802	0.0309516	0.220059	0.183087	0.212133	0.613628	0.167545	0.279291	0.0841256	0.196273	0.223945	0.239889	0.288544	0.245478	0.238826	0.0150823	0.333764	0.267645	0.259715	0.223945	0.211025	0.259219	0.0214419
	25	0.223744	0.220232	0.20236	0.248332	0.343168	0.247567	0.0249986	0.217109	0.135933	0.208168	0.128908	0.181595	0.174342	0.0181182	0.204203	0.271318	0.283505	0.348837	0.245478	0.270668	0.0237989	0.35745	0.315226	0.259715	0.236865	0.215332	0.276917	0.026121
	40	0.308044	0.255357	0.237758	0.265894	0.480155	0.309441	0.0442182	0.243658	0.192132	0.200238	0.220232	0.357218	0.242696	0.0299836	0.200238	0.223945	0.323156	0.344531	0.245478	0.26747	0.028229	0.37037	0.366772	0.259715	0.223945	0.202412	0.284643	0.0354698
	70	0.343168	0.248332	0.302655	0.221578	0.317878	0.286722	0.0225037	0.252507	0.209694	0.212133	0.269406	0.399368	0.268622	0.0346541	0.208168	0.236865	0.366772	0.267011	0.254091	0.266582	0.0269162	0.391904	0.354877	0.27161	0.236865	0.228252	0.296701	0.0326675
	120	0.272919	0.202669	0.258407	0.262381	0.24512	0.248299	0.012245	0.258407	0.318581	0.339017	0.181595	0.441517	0.307823	0.0432079	0.212133	0.245478	0.378668	0.297158	0.232558	0.273199	0.0298721	0.39621	0.382633	0.267645	0.258398	0.211025	0.303182	0.0365569
B	Blood glucose	Endo-Kir6.2-V108E (saline, vehicle)							Endo-Kir6.2-V108E (SpTx1, 1 mg/kg)							Rosa-Kir6.2-NDMV108E (saline, vehicle)												Rosa-Kir6.2-NDMV108E (SpTx1, 1 mg/kg)
		male	male	male	female	female	Mean (n=5)	SEM (n=5)	female	female	female	female	male	Mean (n=5)	SEM (n=5)	male	male	male	male	male	female	female	female	female	female	Mean (n=10)	SEM (n=10)	male	male	male	male	male	female	female	female	female	female	Mean (n=10)	SEM (n=10)
	Minutes	Mouse 1	Mouse 2	Mouse 3	Mouse 4	Mouse 5			Mouse 1	Mouse 2	Mouse 3	Mouse 4	Mouse 5			Mouse 1	Mouse 2	Mouse 3	Mouse 4	Mouse 5	Mouse 6	Mouse 7	Mouse 8	Mouse 9	Mouse 10			Mouse 1	Mouse 2	Mouse 3	Mouse 4	Mouse 5	Mouse 6	Mouse 7	Mouse 8	Mouse 9	Mouse 10
	0	179	221	218.5	176.5	183.5	195.7	9.89015	177.5	252	167.5	127	247.5	194.3	24.1757	960	976	844	816	1000	933	1190	1068	966	1152	990.5	37.8504	1113	1032	892	832	768	939	1080	1160	846	934	959.6	41.4965
	5	180	233	202.5	173.5	204	198.6	10.4969	256.5	224.5	164	149.5	260	210.9	23.0702	872	924	812	832	968	945	1198	632	968	1144	929.5	51.2578	1071	1020	798	792	712	1014	1195	1215	858	1058	973.3	55.1058
	10	190.5	234	240.5	169	198	206.4	13.5031	246.5	231	204.5	131	272.5	217.1	24.1854	1108	980	978	914	860	1107	952	1036	976	1022	993.3	24.7665	996	873	796	850	744	879	1270	1135	668	946	915.7	57.1196
	15	209	211.5	217.5	170.5	169	195.5	10.6054	260.5	210	199	124.5	251.5	209.1	24.1865	916	998	968	806	884	771	1038	1072	996	1016	946.5	31.6042	990	879	686	471.5	531.5	807	1185	1430	575	474	802.9	102.053
	25	190	215	237.5	185.5	187.5	203.1	10.1235	236	198.5	211	121	234	200.1	20.9955	856	606	958	974	922	760.5	928	834	916	796	855.05	35.4594	861	807	539.5	505	561.5	492	485	475	424.5	473	562.35	46.9522
	40	168.5	214	244	169	198	198.7	14.2843	190	201	171.5	116	222.5	180.2	18.049	964	662	964	1166	888	822	878	820	802	818	878.4	42.212	519.5	471	527.5	500.5	415.5	516.5	377.5	405.5	394.5	477	460.5	18.0688
	70	162.5	229.5	210.5	137.5	135	175	19.2263	163	137	128	120.5	186	146.9	12.1248	736	984	878	992	834	669	682	706	778	796	805.5	36.8442	478.5	544	475	473.5	399.5	500	374.5	397.5	452	478.5	457.3	16.538
	120	155	199	187.5	145.5	138.5	165.1	11.9262	112.5	112.5	136	111	163	127	10.1329	972	934	884	932	822	814.5	664	724	798	782	832.65	31.0294	519.5	518	460.5	488	556	528.5	439	467.5	427	471.5	487.55	13.2183
D	Plasma insulin	Endo-Kir6.2-V108E (saline, vehicle)							Endo-Kir6.2-V108E (SpTx1, 1 mg/kg)							Rosa-Kir6.2-NDMV108E (saline, vehicle)												Rosa-Kir6.2-NDMV108E (SpTx1, 1 mg/kg)
		male	male	male	female	female	Mean (n=5)	SEM (n=5)	female	female	female	female	male	Mean (n=5)	SEM (n=5)	male	male	male	male	male	female	female	female	female	female	Mean (n=10)	SEM (n=10)	male	male	male	male	male	female	female	female	female	female	Mean (n=10)	SEM (n=10)
	Minutes	Mouse 1	Mouse 2	Mouse 3	Mouse 4	Mouse 5			Mouse 1	Mouse 2	Mouse 3	Mouse 4	Mouse 5			Mouse 1	Mouse 2	Mouse 3	Mouse 4	Mouse 5	Mouse 6	Mouse 7	Mouse 8	Mouse 9	Mouse 10			Mouse 1	Mouse 2	Mouse 3	Mouse 4	Mouse 5	Mouse 6	Mouse 7	Mouse 8	Mouse 9	Mouse 10
	0	0.656497	0.721751	0.577401	0.48318	0.457696	0.579305	0.0501407	0.168363	0.3148	0.150352	0.064213	0.48318	0.236182	0.0737321	0.40226	0.350282	0.111198	0.22083	0.0563821	0.39024	0.213048	0.232558	0.228252	0.258398	0.246345	0.0353697	0.280406	0.357669	0.247197	0.207951	0.243629	0.321543	0.231424	0.280406	0.289501	0.197757	0.265748	0.0158224
	5	0.922034	1.03202	0.938983	0.38634	0.498471	0.755569	0.130423	0.452232	0.181676	0.178152	0.138998	0.518858	0.293983	0.0792659	0.72693	0.566855	0.00939702	0.158183	0.111198	0.424859	0.223242	0.228252	0.219638	0.267011	0.293556	0.0689162	0.447878	0.544082	0.213048	0.187564	0.223242	0.231424	0.321543	0.0349022	0.264016	0.213048	0.268075	0.0449253
	10	0.978531	0.786441	0.967232	0.376147	0.513761	0.724422	0.121047	0.472461	0.285826	0.361785	0.689115	0.406728	0.443183	0.0685768	0.877589	0.877589	0	0.181676	0	0.487006	0.243629	0.232558	0.228252	0.262705	0.3391	0.0997312	1.99257	0.938983	1.00306	3.40367	0.289501	0.0746031	0.111026	0.0746031	0.523955	2.02752	1.04395	0.350198
	15	1.11723	1.02373	0.848399	0.584862	0.493374	0.813519	0.120918	0.289742	0.236492	0.138998	0.258418	0.472987	0.279327	0.0545788	0.463277	0.369115	0.111198	0.134691	0.0563821	0.6	0.238532	0.228252	0.215332	0.254091	0.267087	0.0528235	1.16008	4.67345	1.44648	0.529052	6.263	2.5527	9.08023	6.35141	0.763507	0.56473	3.33846	0.963443
	25	0.882486	0.763842	0.927684	0.416922	0.559633	0.710113	0.0970932	0.346124	0.346124	0.259984	0.36805	0.518858	0.367828	0.042061	0.737288	0.566855	0.197338	0.181676	0.166014	0.185044	0.233435	0.223945	0.228252	0.236865	0.295671	0.0612192	0.426073	0.44287	0.223242	0.269113	0.717635	0.306342	1.60616	0.688866	0.294597	0.248726	0.522363	0.132627
	40	0.651601	1.02938	1.07458	0.447503	0.610601	0.762732	0.123128	0.698512	0.37	0.481597	0.493344	0.508665	0.510424	0.0530197	0.510358	0.587571	0.158183	0.236492	0.119029	0.138783	0.233435	0.219638	0.219638	0.245478	0.266861	0.0493481	0.271481	0.338802	0.197757	0.218145	0.223242	0.167084	0.384044	0.291797	0.289501	0.207951	0.25898	0.0215817
	70	0.871186	1.18785	0.922034	0.518858	0.427115	0.785409	0.139178	0.563821	0.491386	0.330462	0.295615	0.544343	0.445125	0.055486	0.864407	0.566855	0.212999	0.346124	0.150352	0.322836	0.243629	0.223945	0.219638	0.236865	0.338765	0.0688604	0.146176	0.150352	0.202854	0.207951	0.218145	0.0349022	0.212999	0.158183	0.330275	0.218145	0.187998	0.0237575
	120	1.05198	0.955932	0.80904	0.523955	0.376147	0.74341	0.12801	0.498564	0.415035	0.18011	0.395458	0.56473	0.410779	0.0651415	0.453861	0.525424	0.0877056	0.22083	0.0955364	0.759534	0.233435	0.211025	0.206718	0.228252	0.302232	0.0670779	0.0955364	0.168363	0.192661	0.207951	0.233435	0.357669	0.103367	0.12686	0.432212	0.218145	0.21362	0.0341715
																												Student's t-test, two-tailed and heteroscedastic
																												P value =	0.011	between the vehicle group and the SpTx1 group for the comparison of the plasma insulin levels of Rosa26mKir6.2NDM-V108E mice at 5 minutes post administration
